# Supplementary material for: Modular synthesis of 3,3-disubstituted oxindoles from nitrones and acrylic acids
Source: Royal Society of Chemistry journal article supplement (doi:10.1039/d4ob00964a), 2024-01-01

10. Copies of  $^1\text{H}$  a

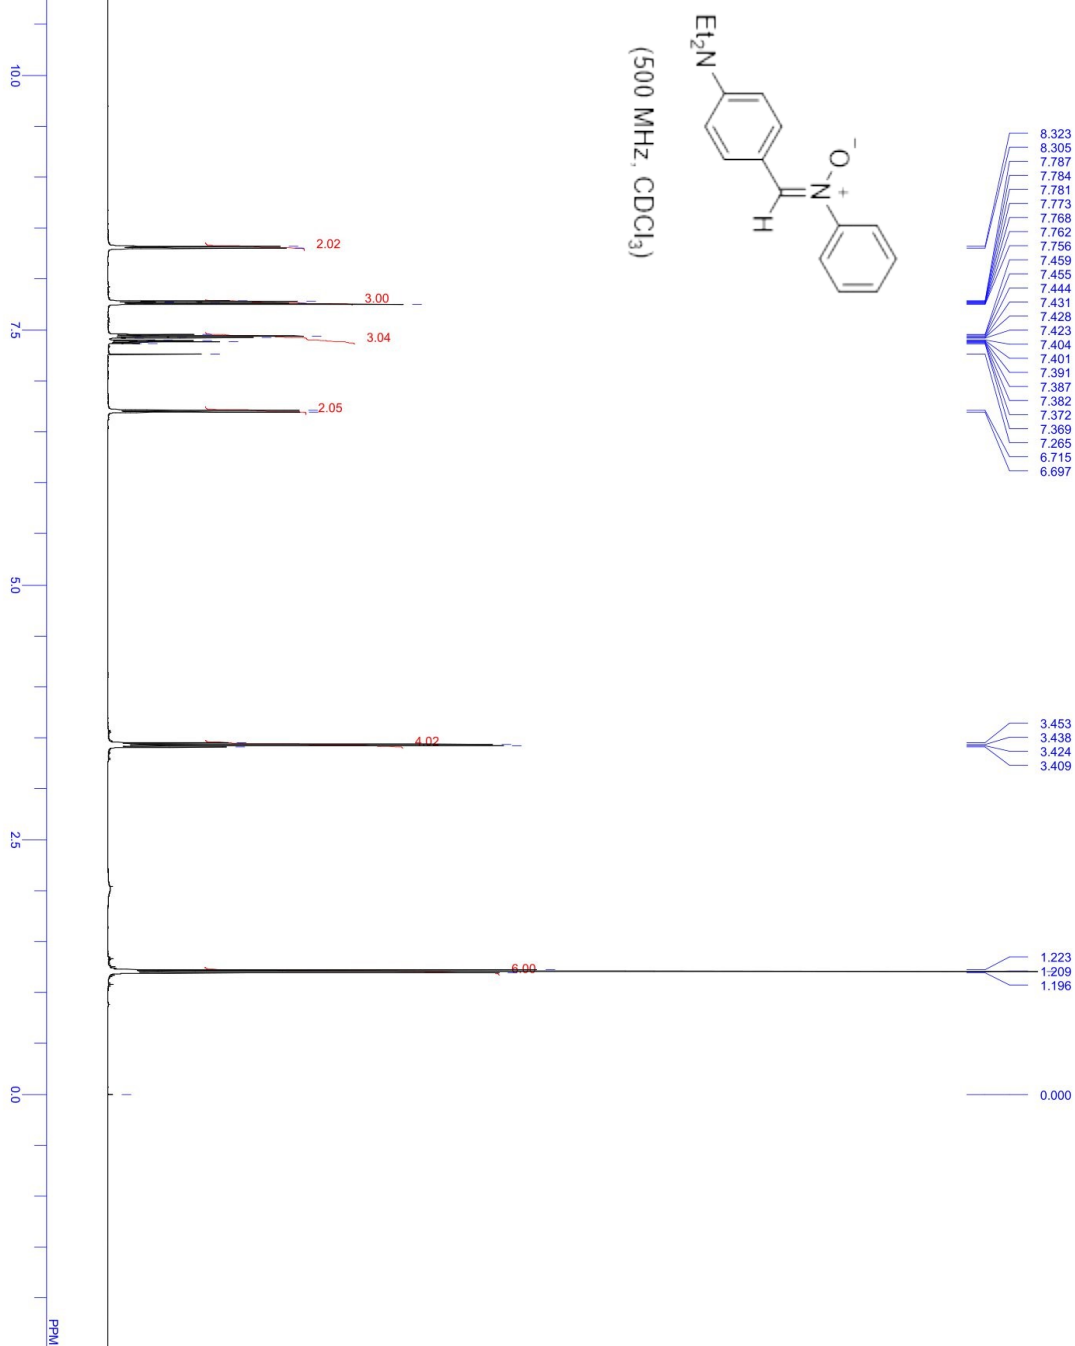

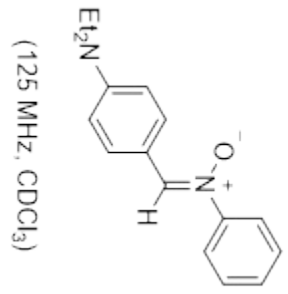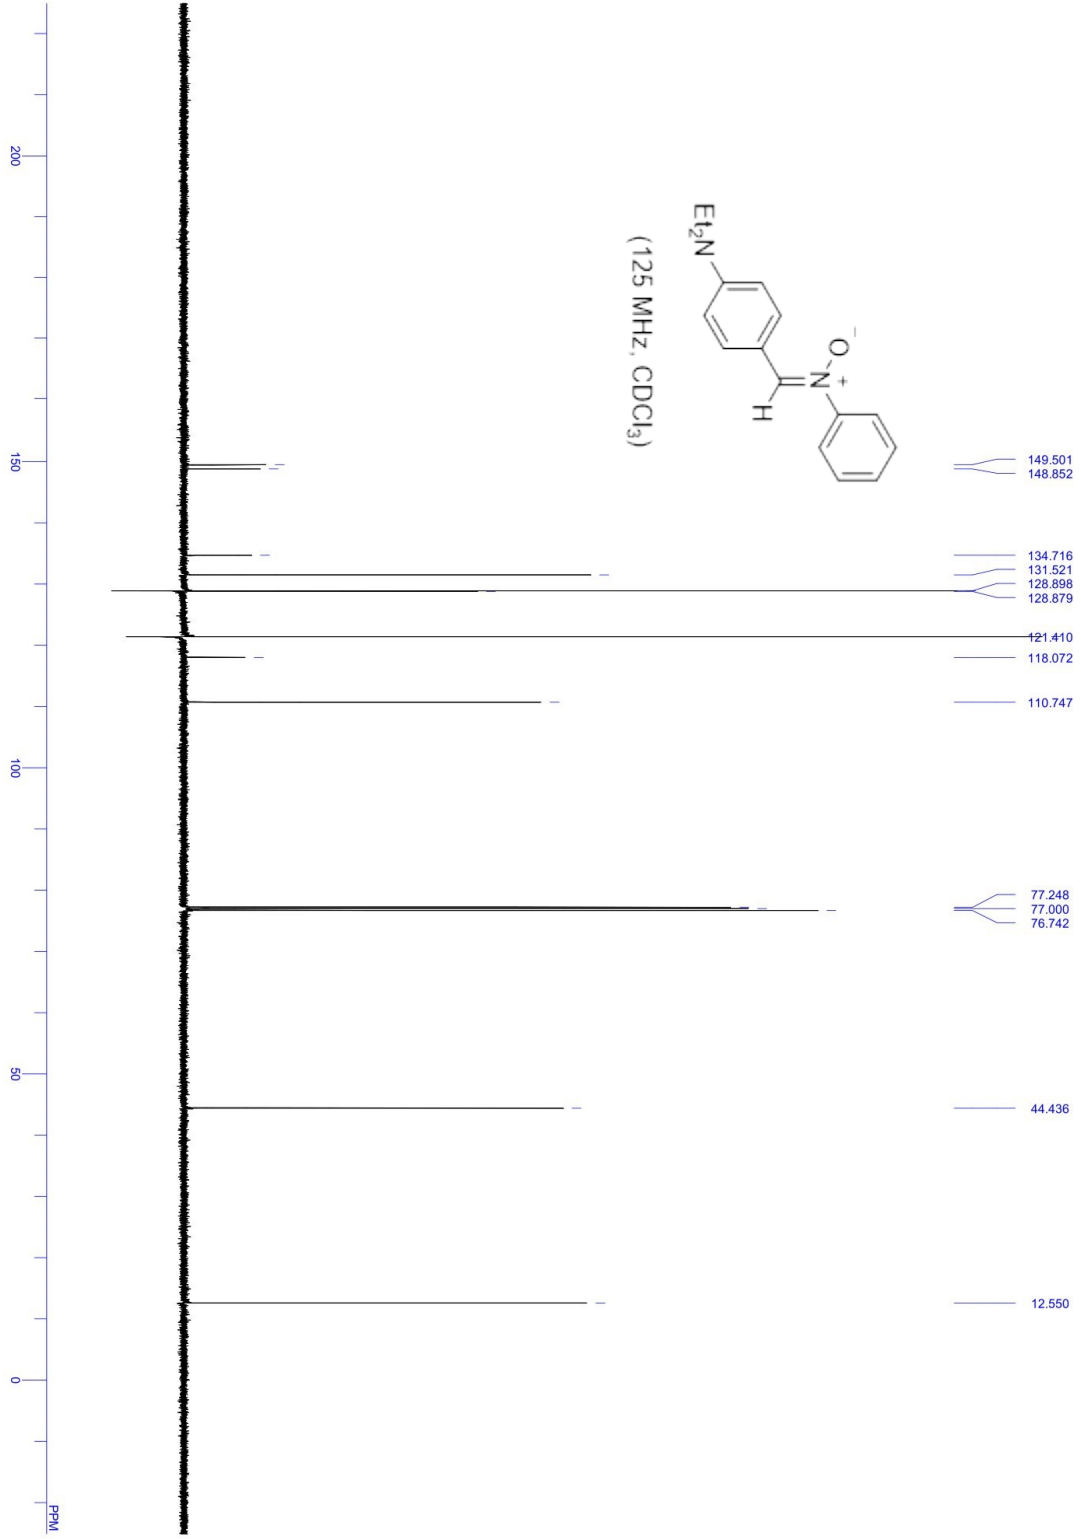

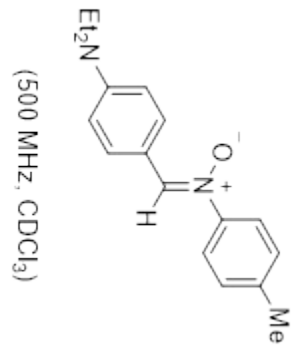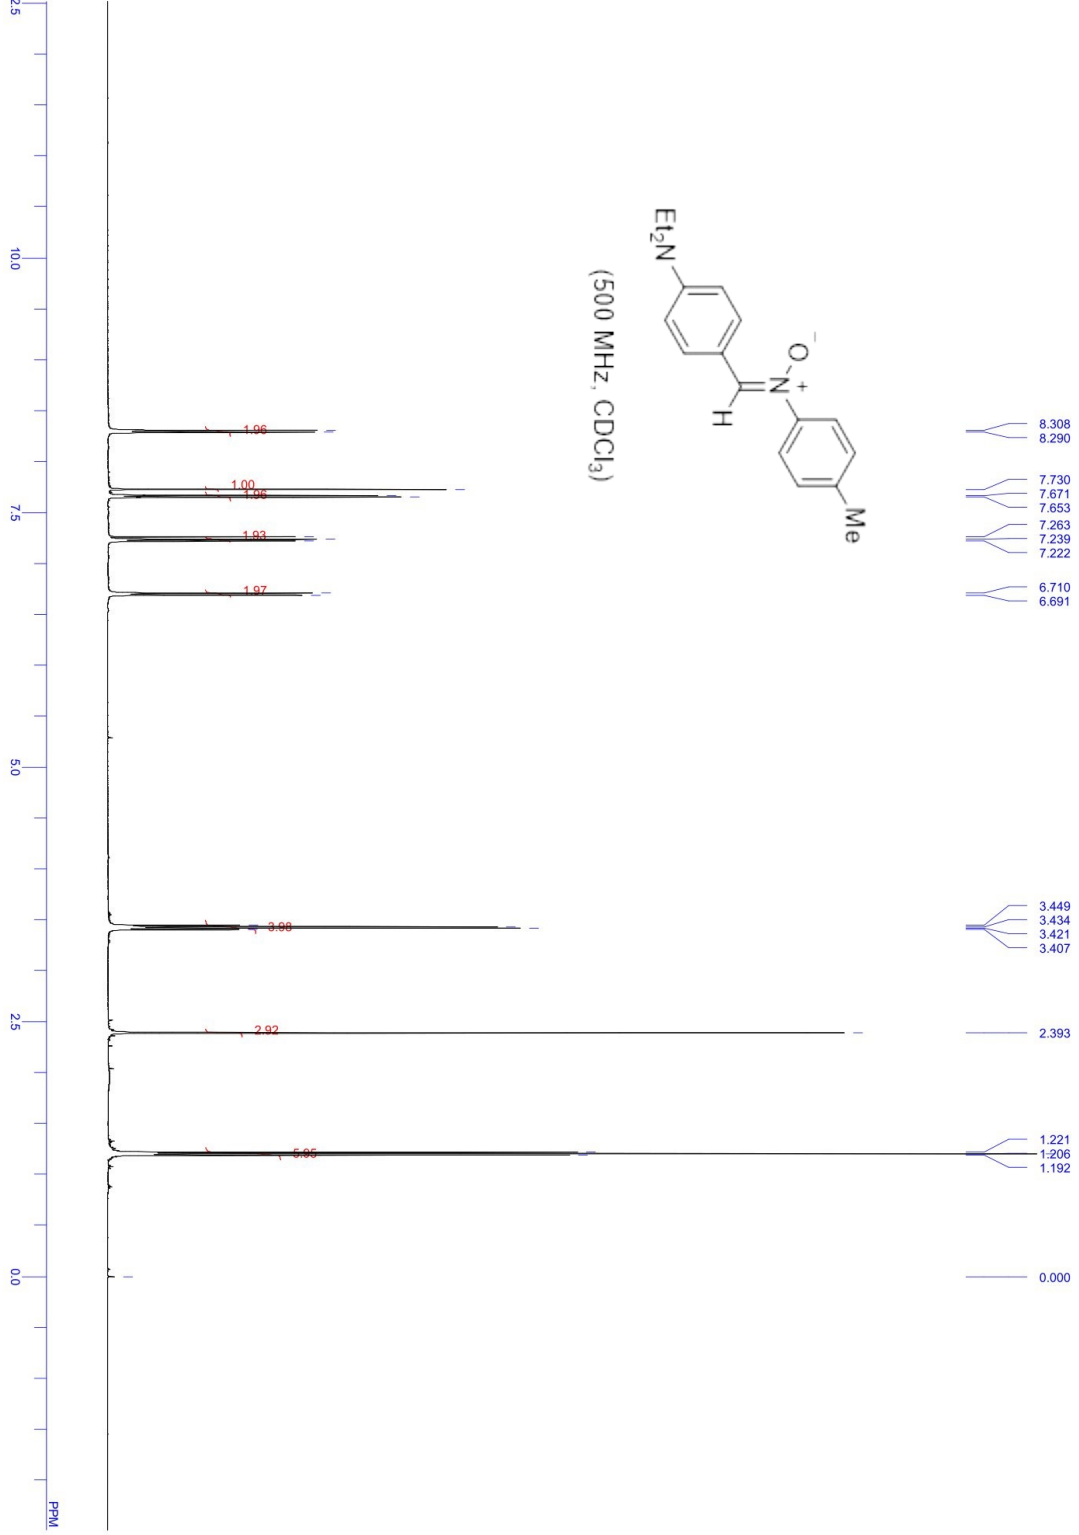

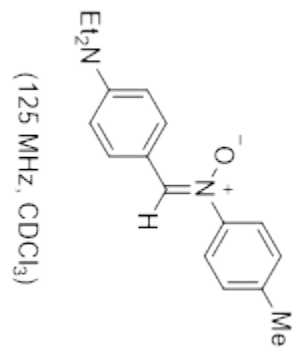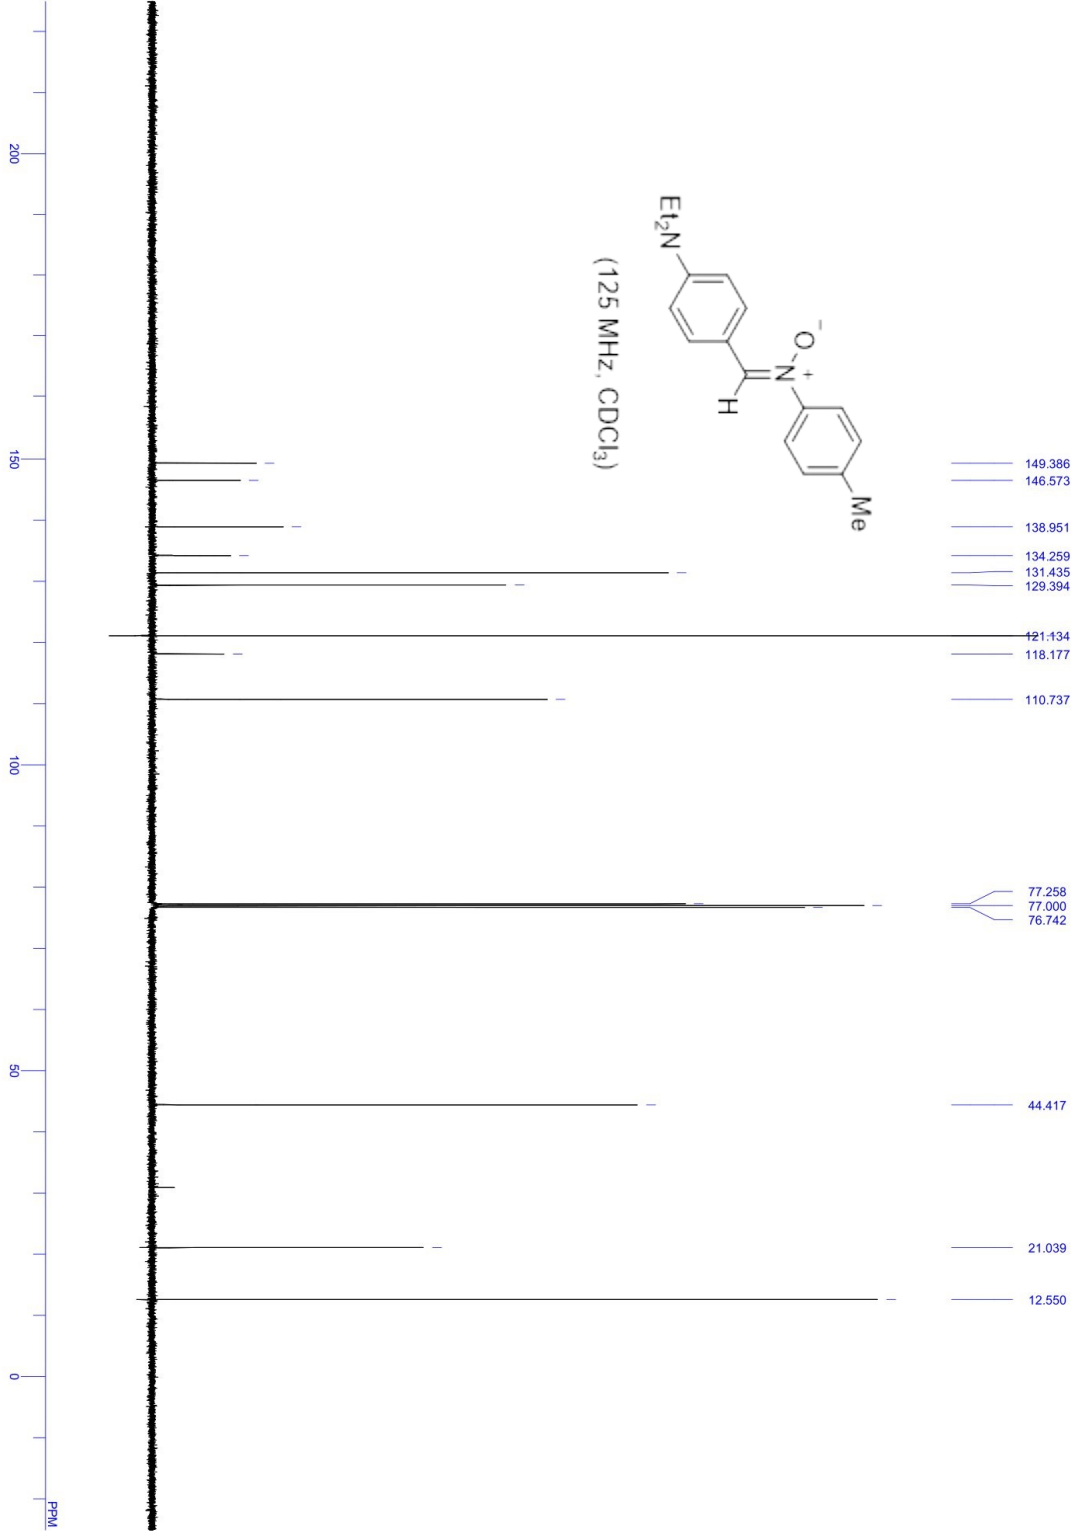

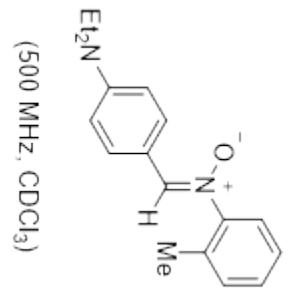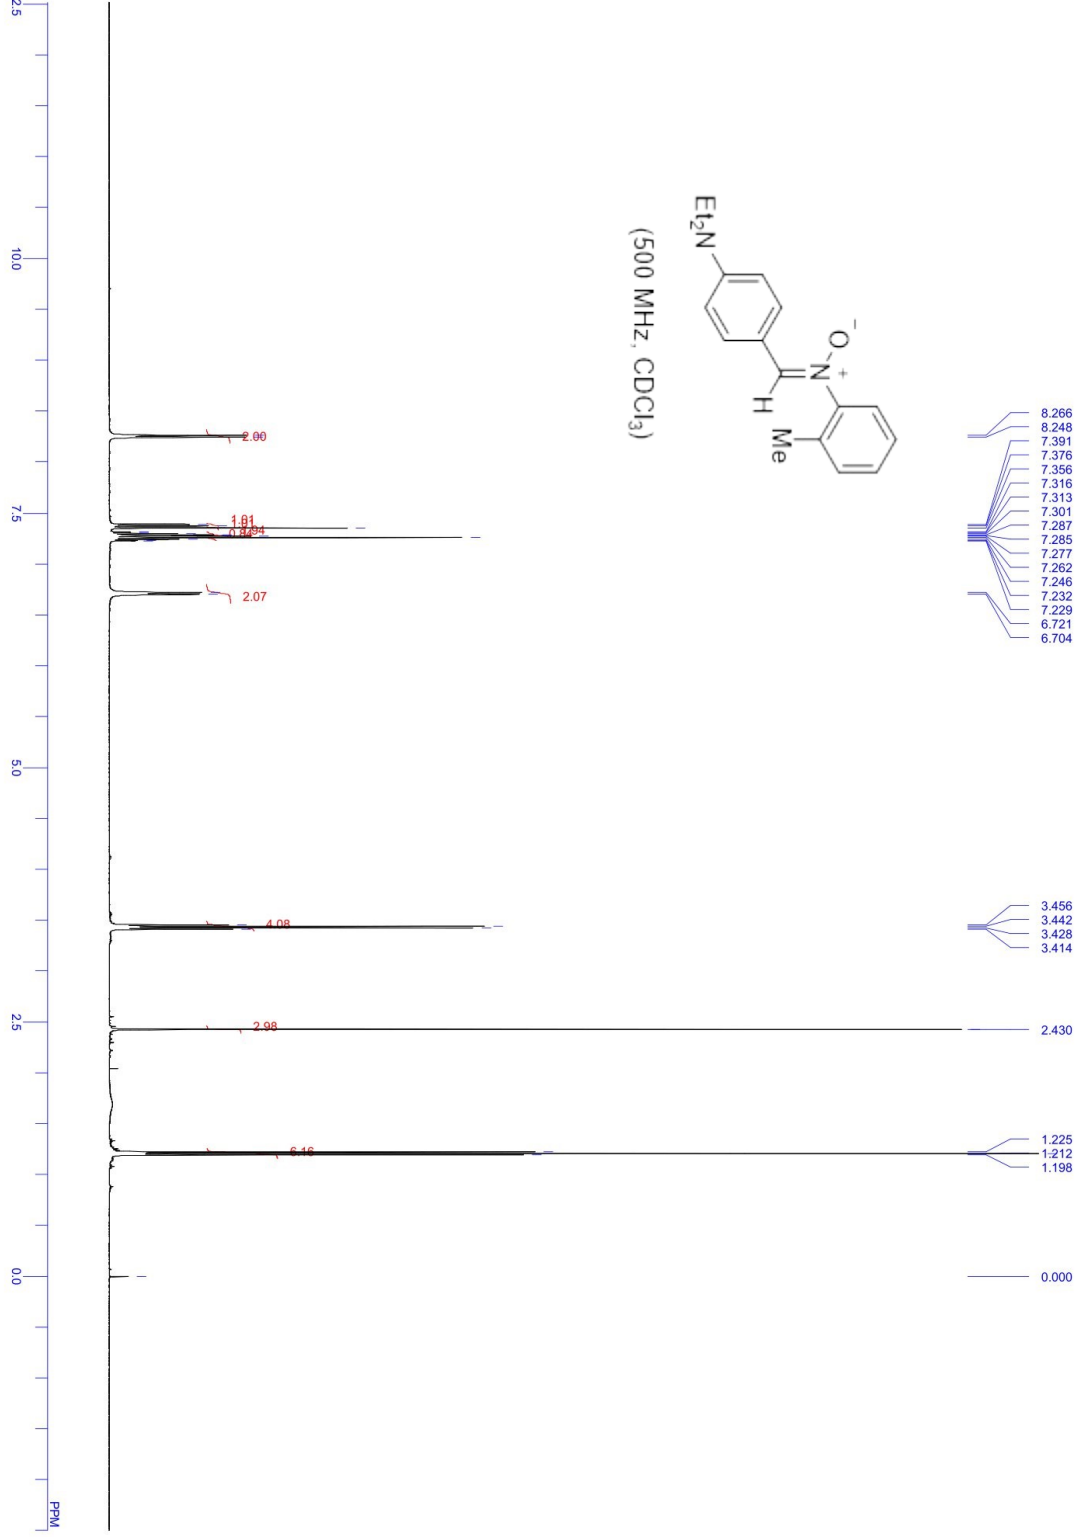

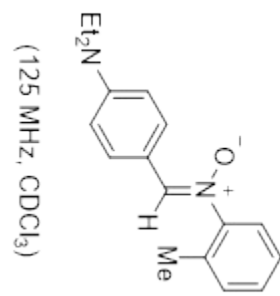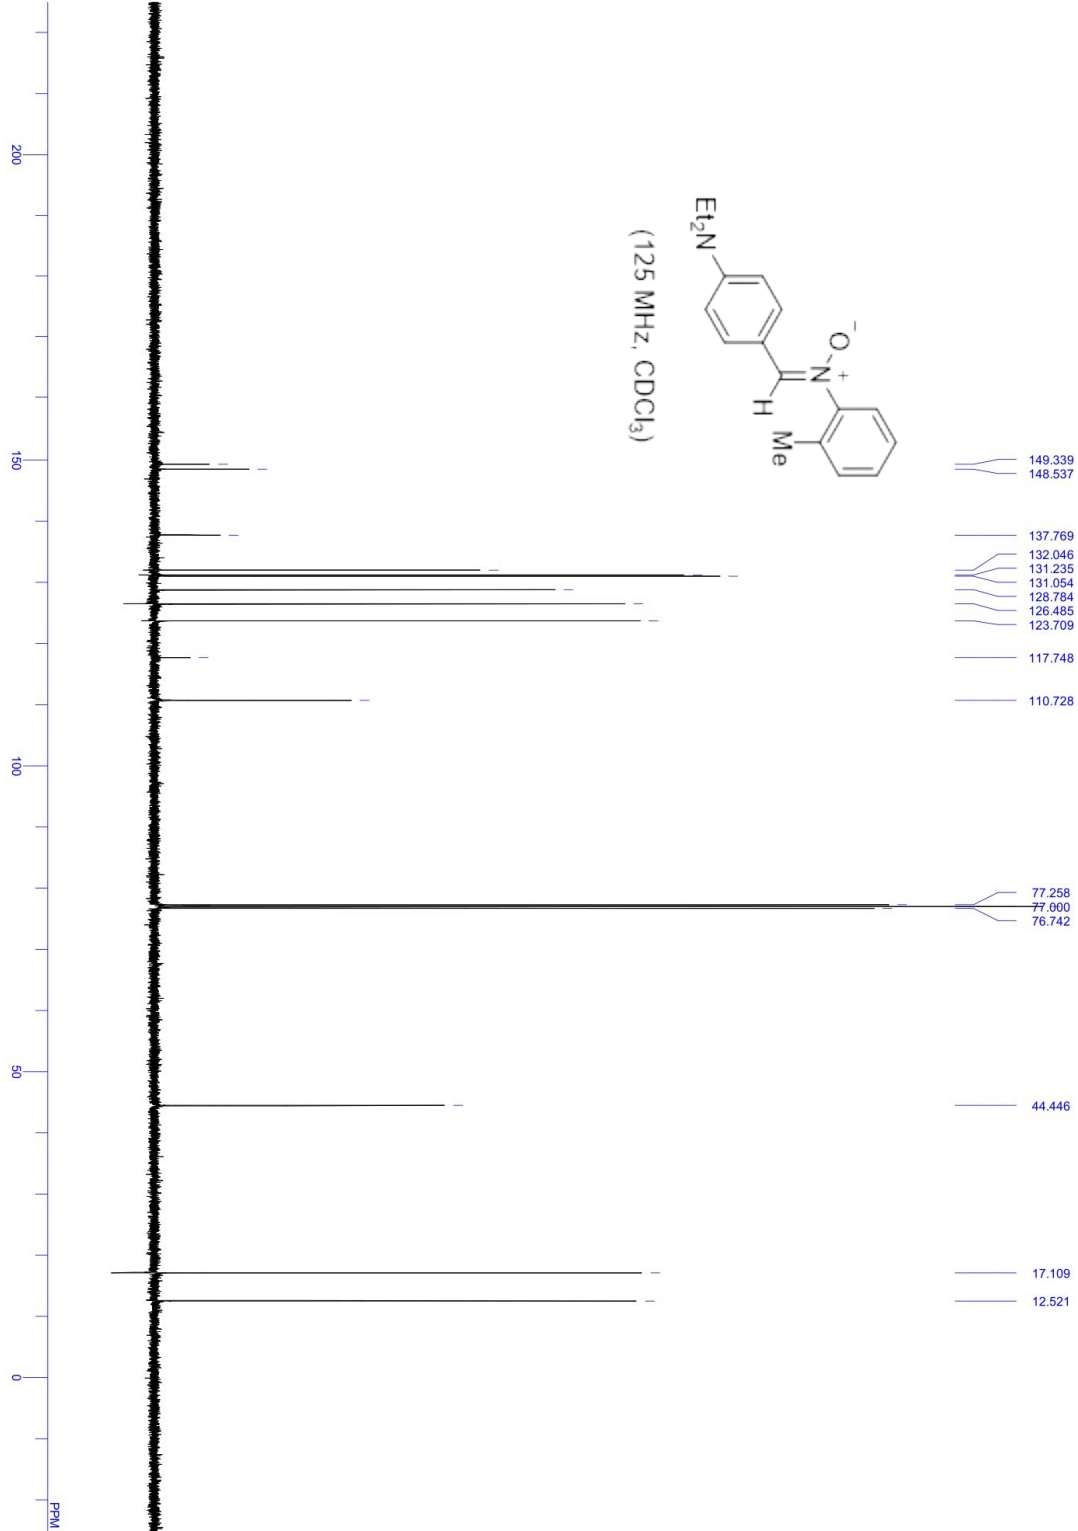

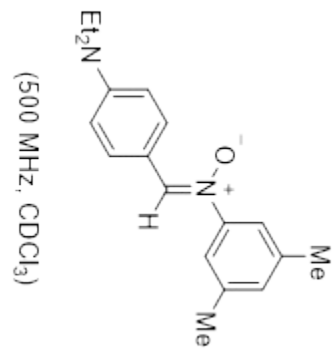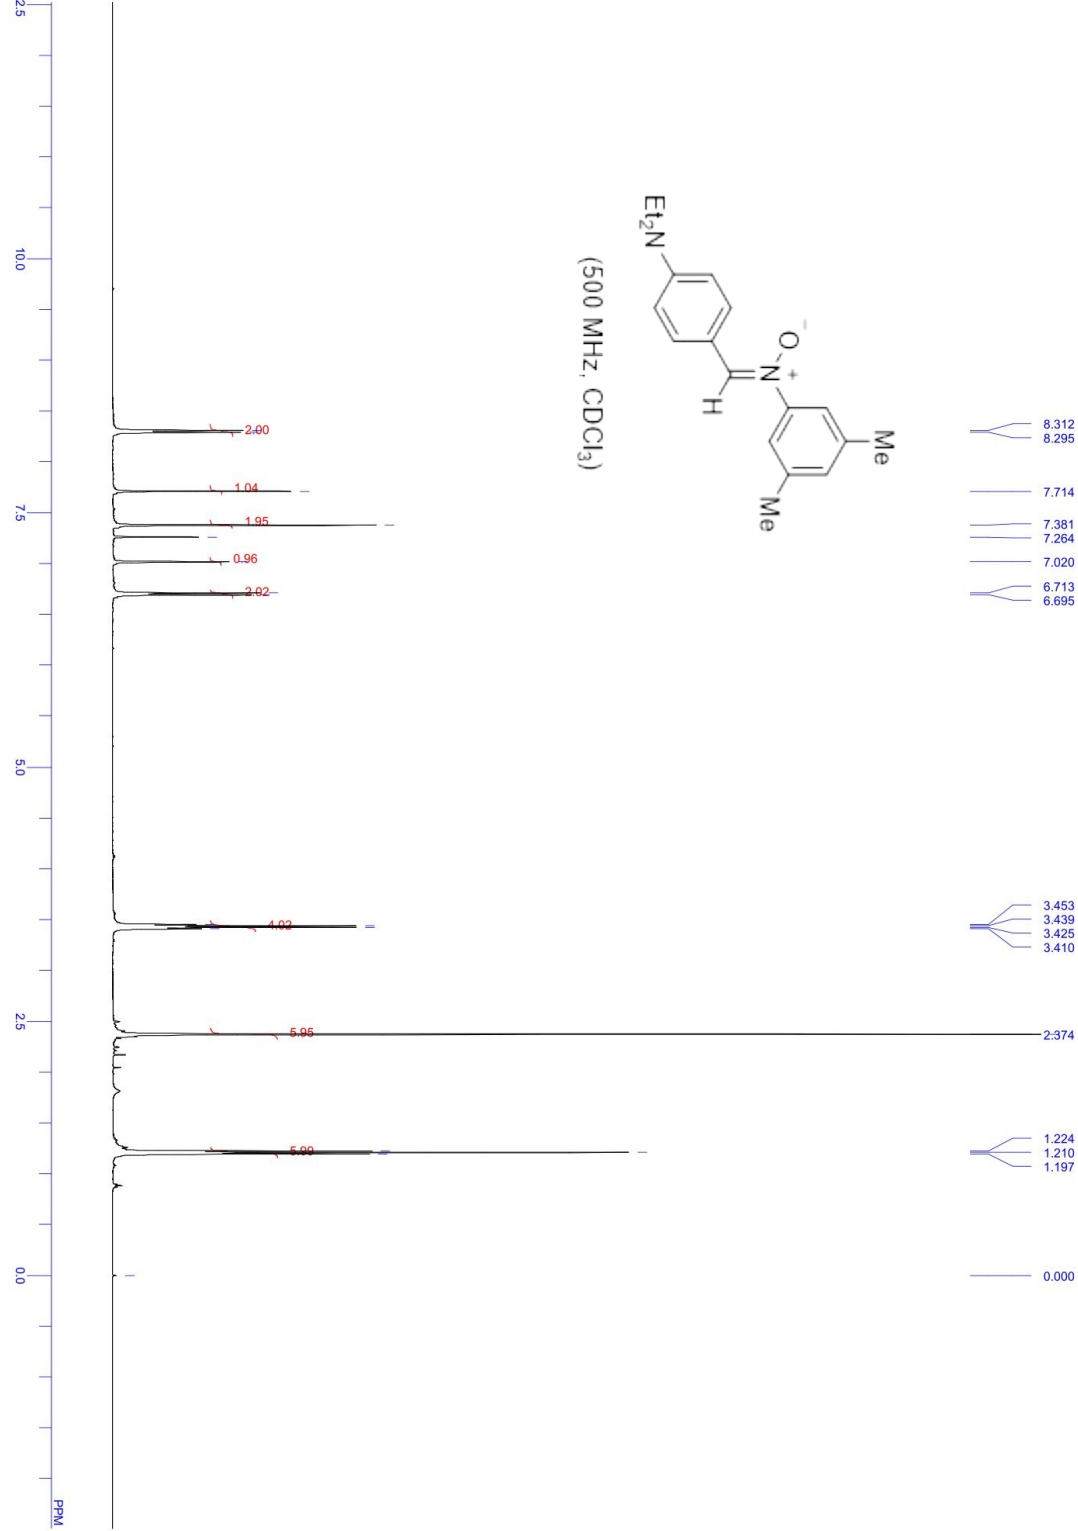

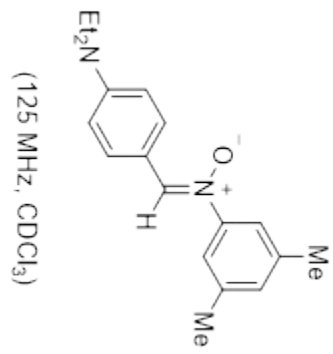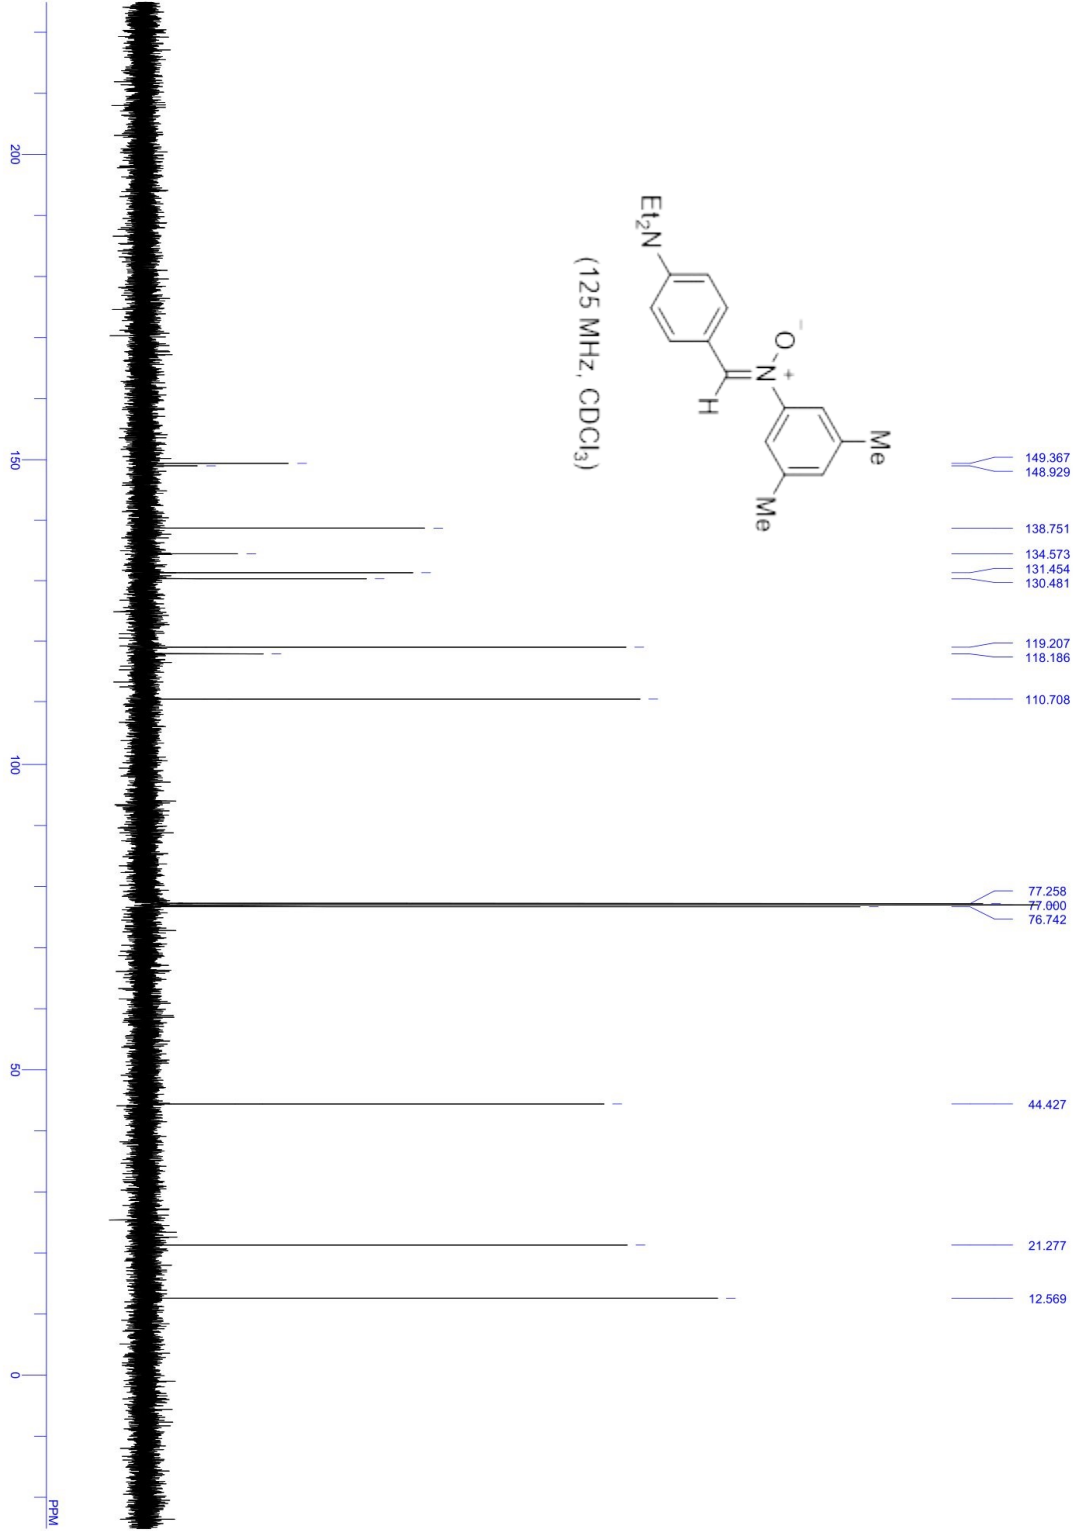



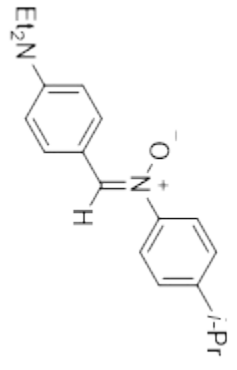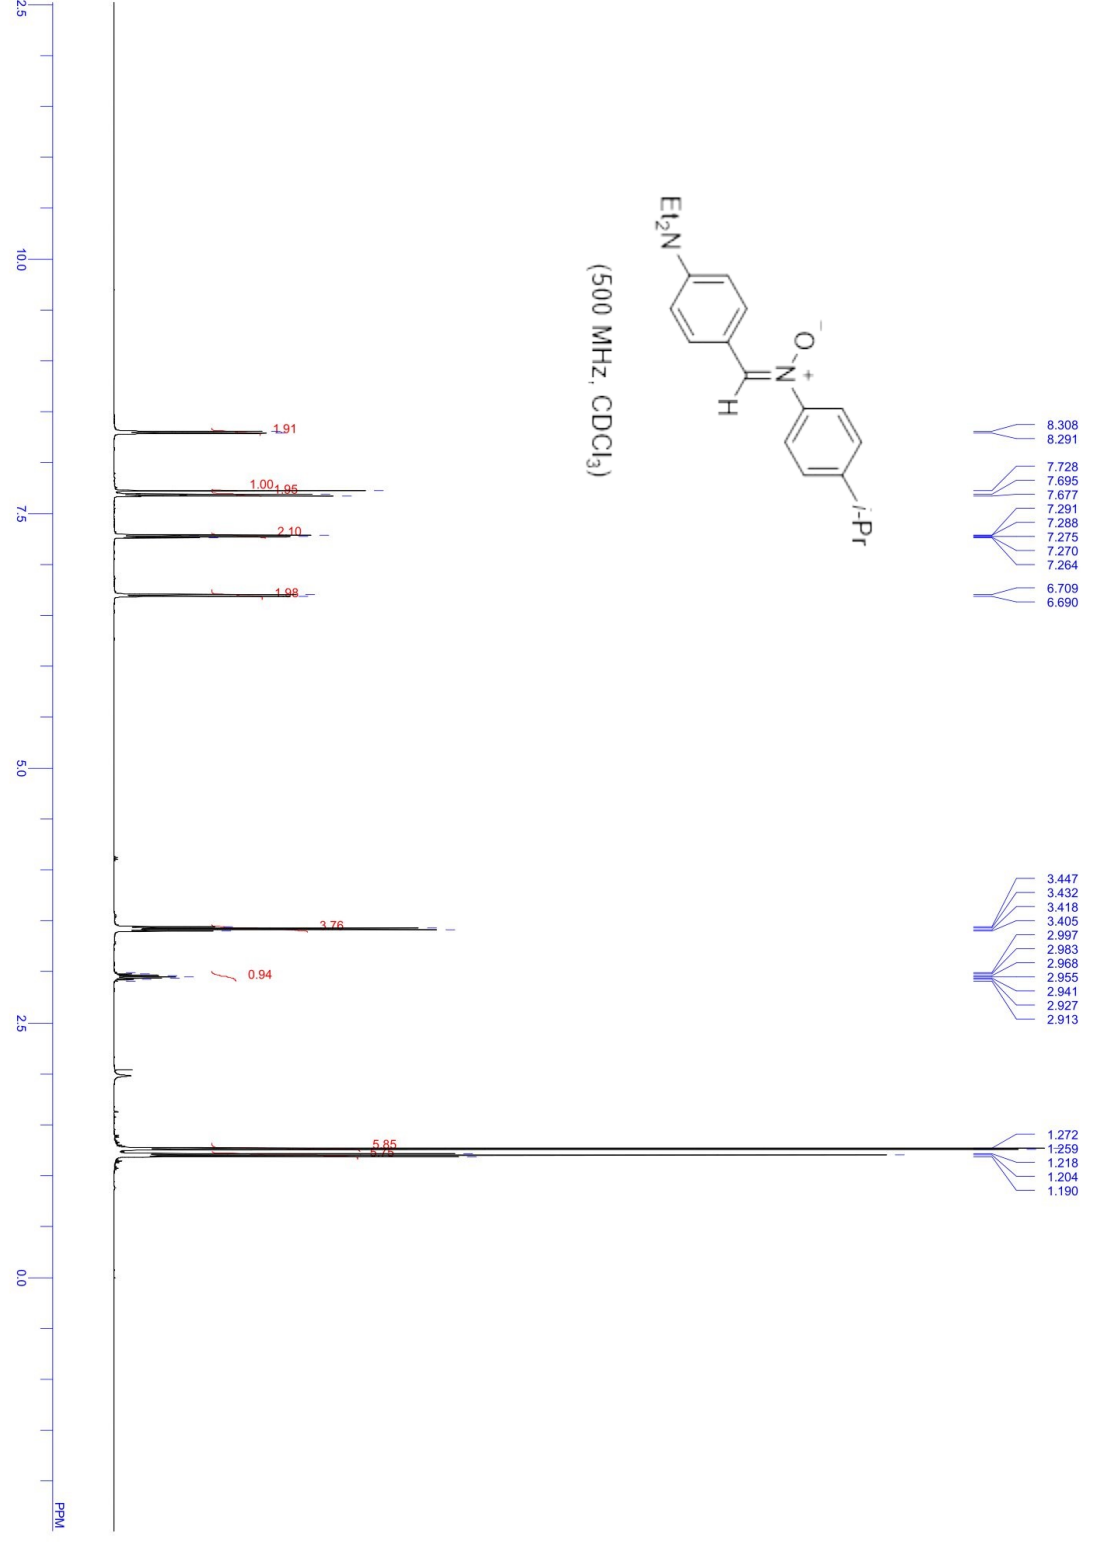

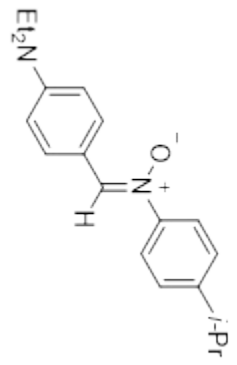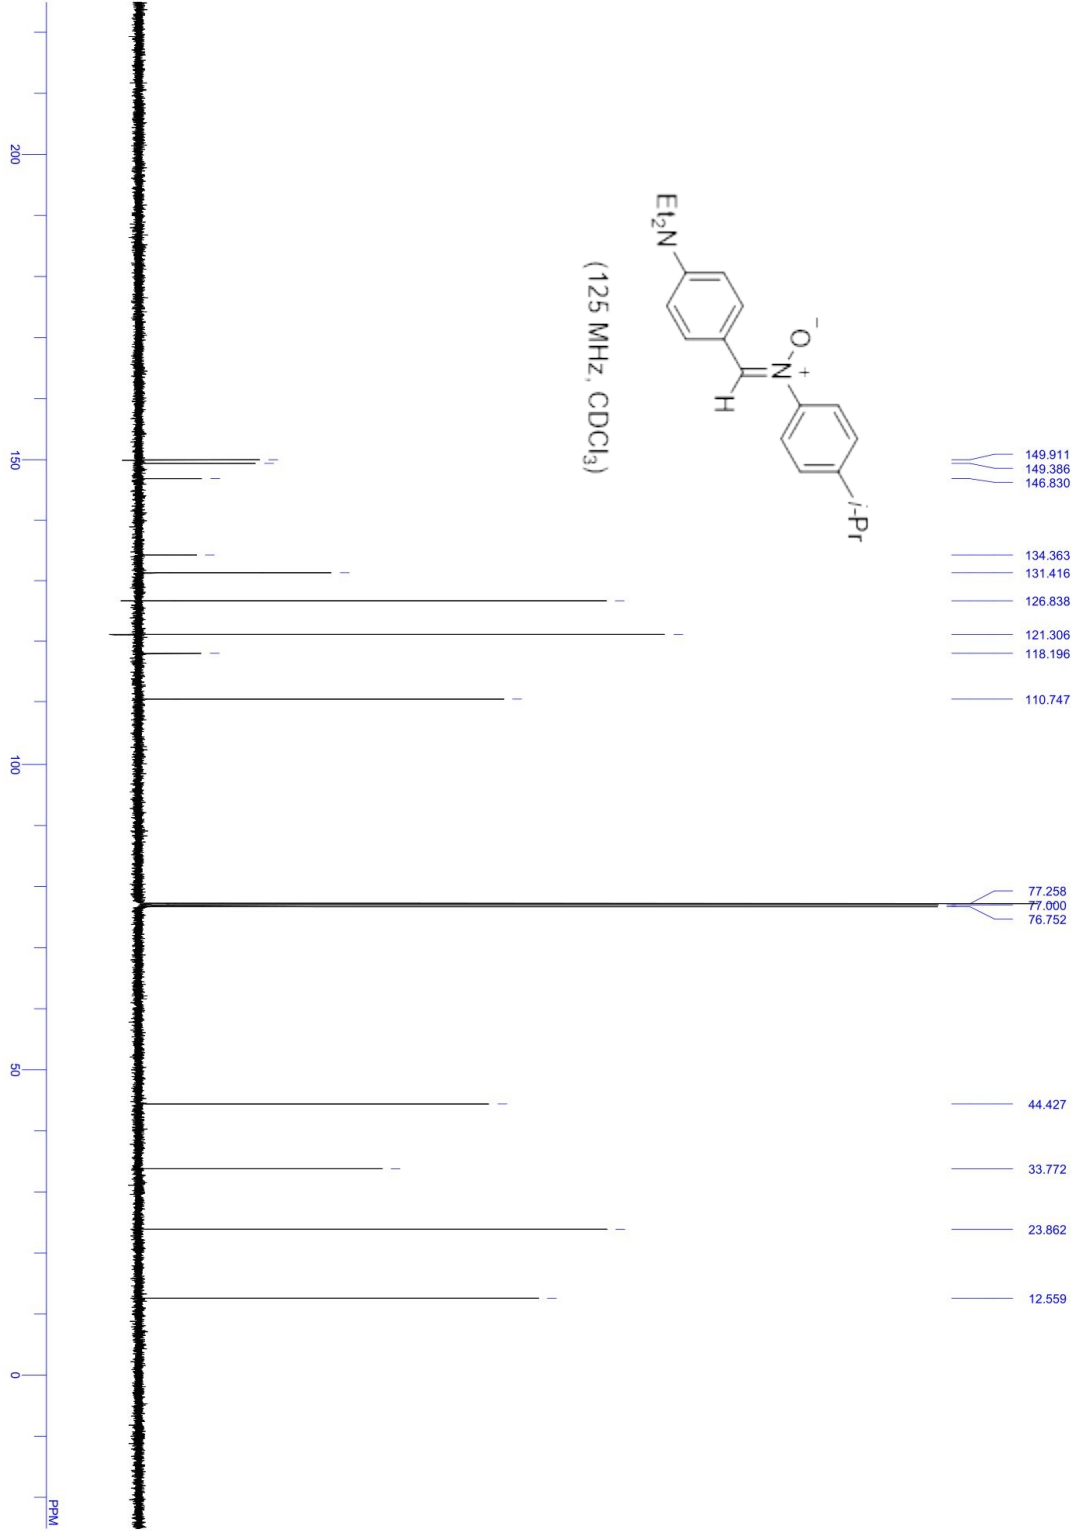

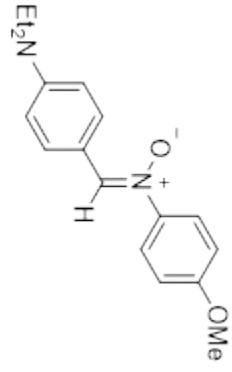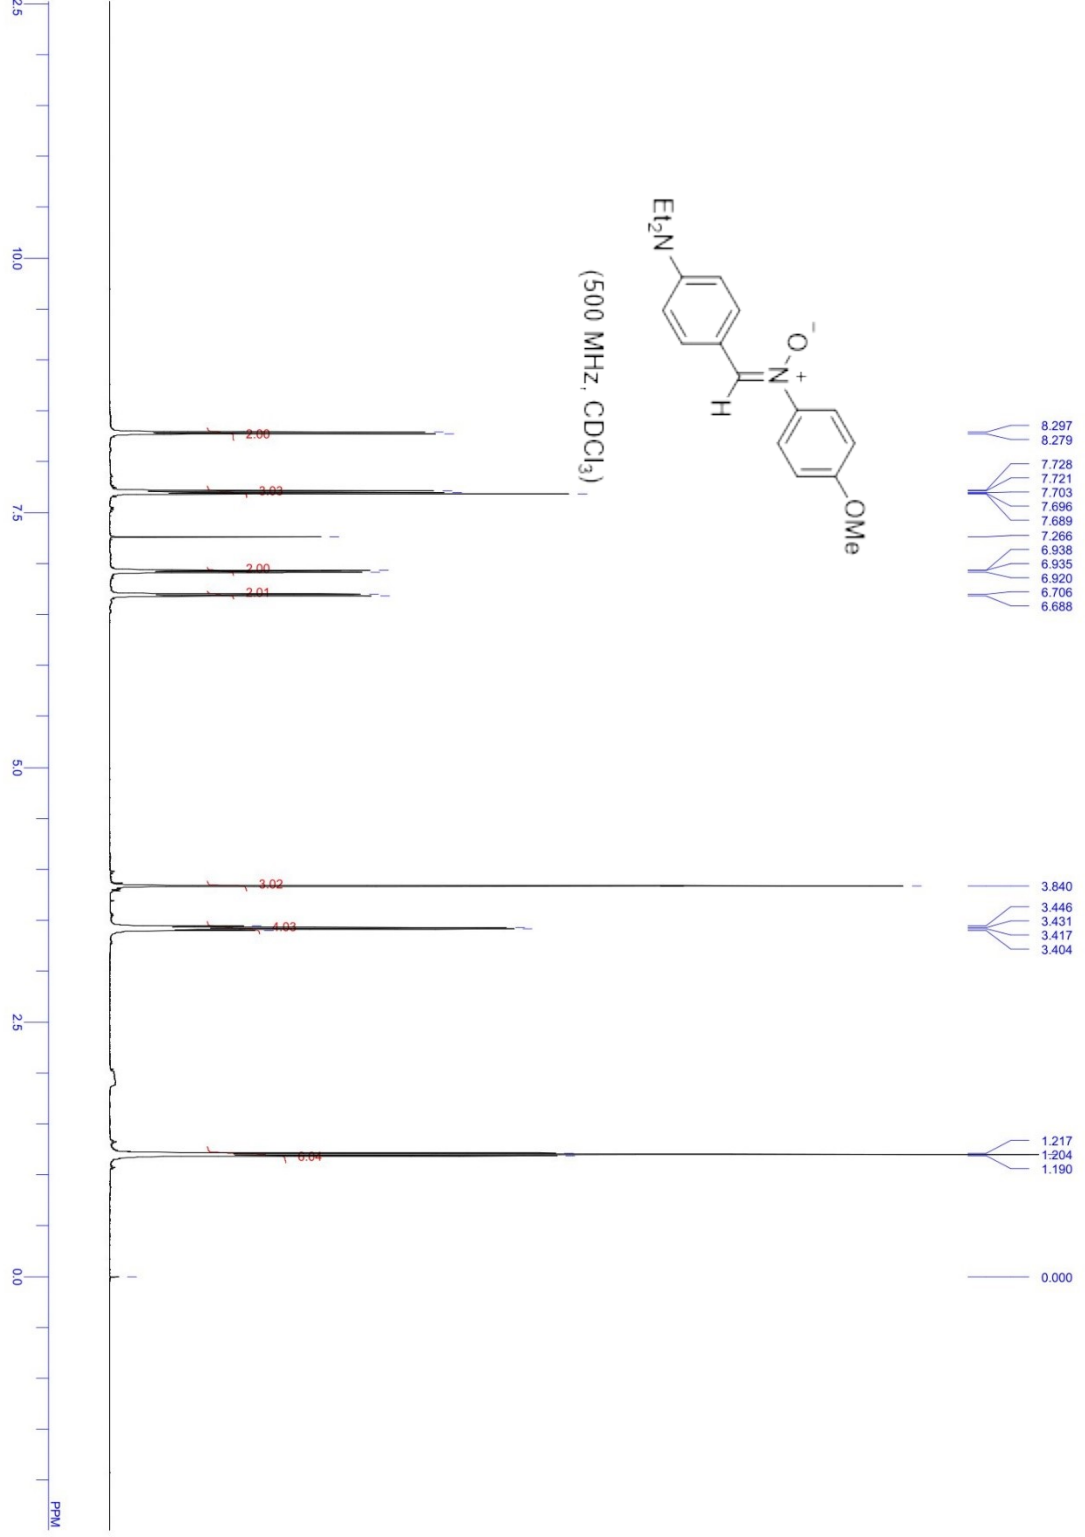

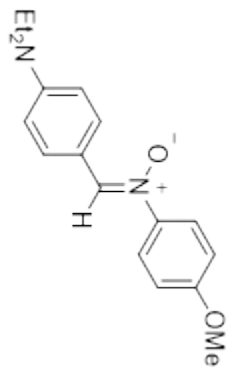

(125 MHz, CDCl<sub>3</sub>)

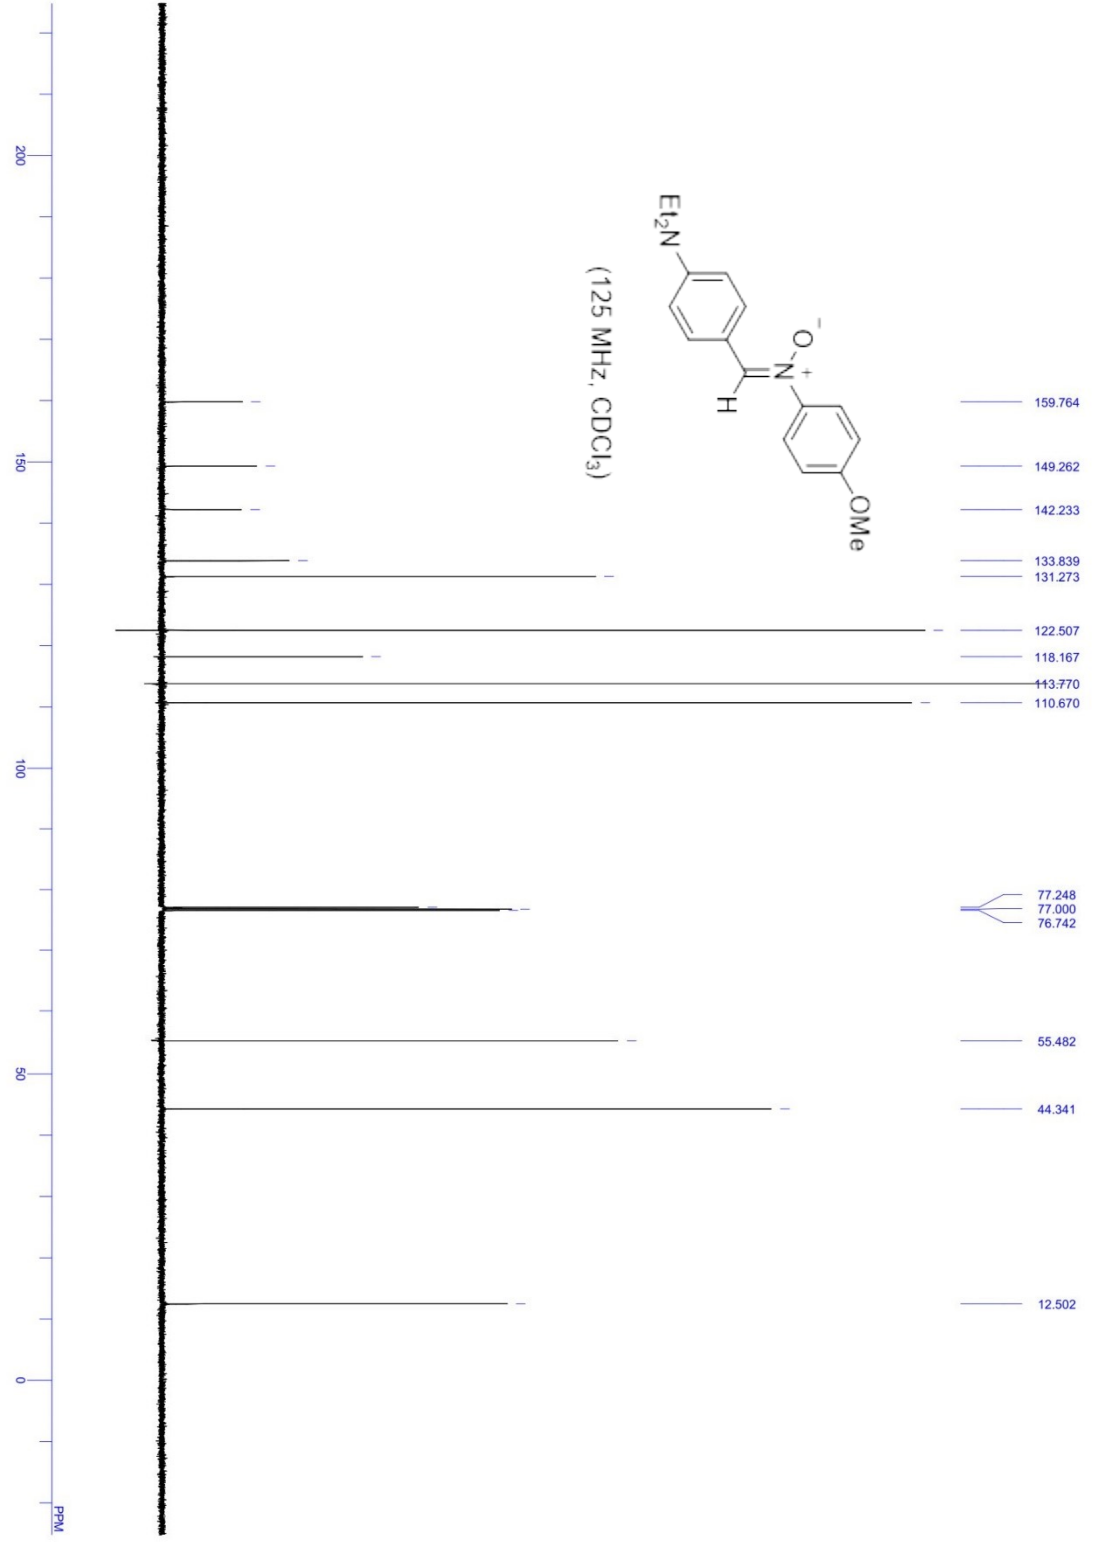

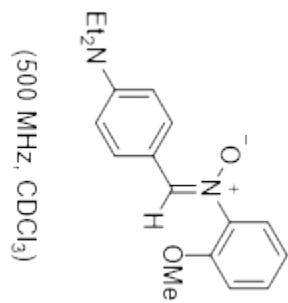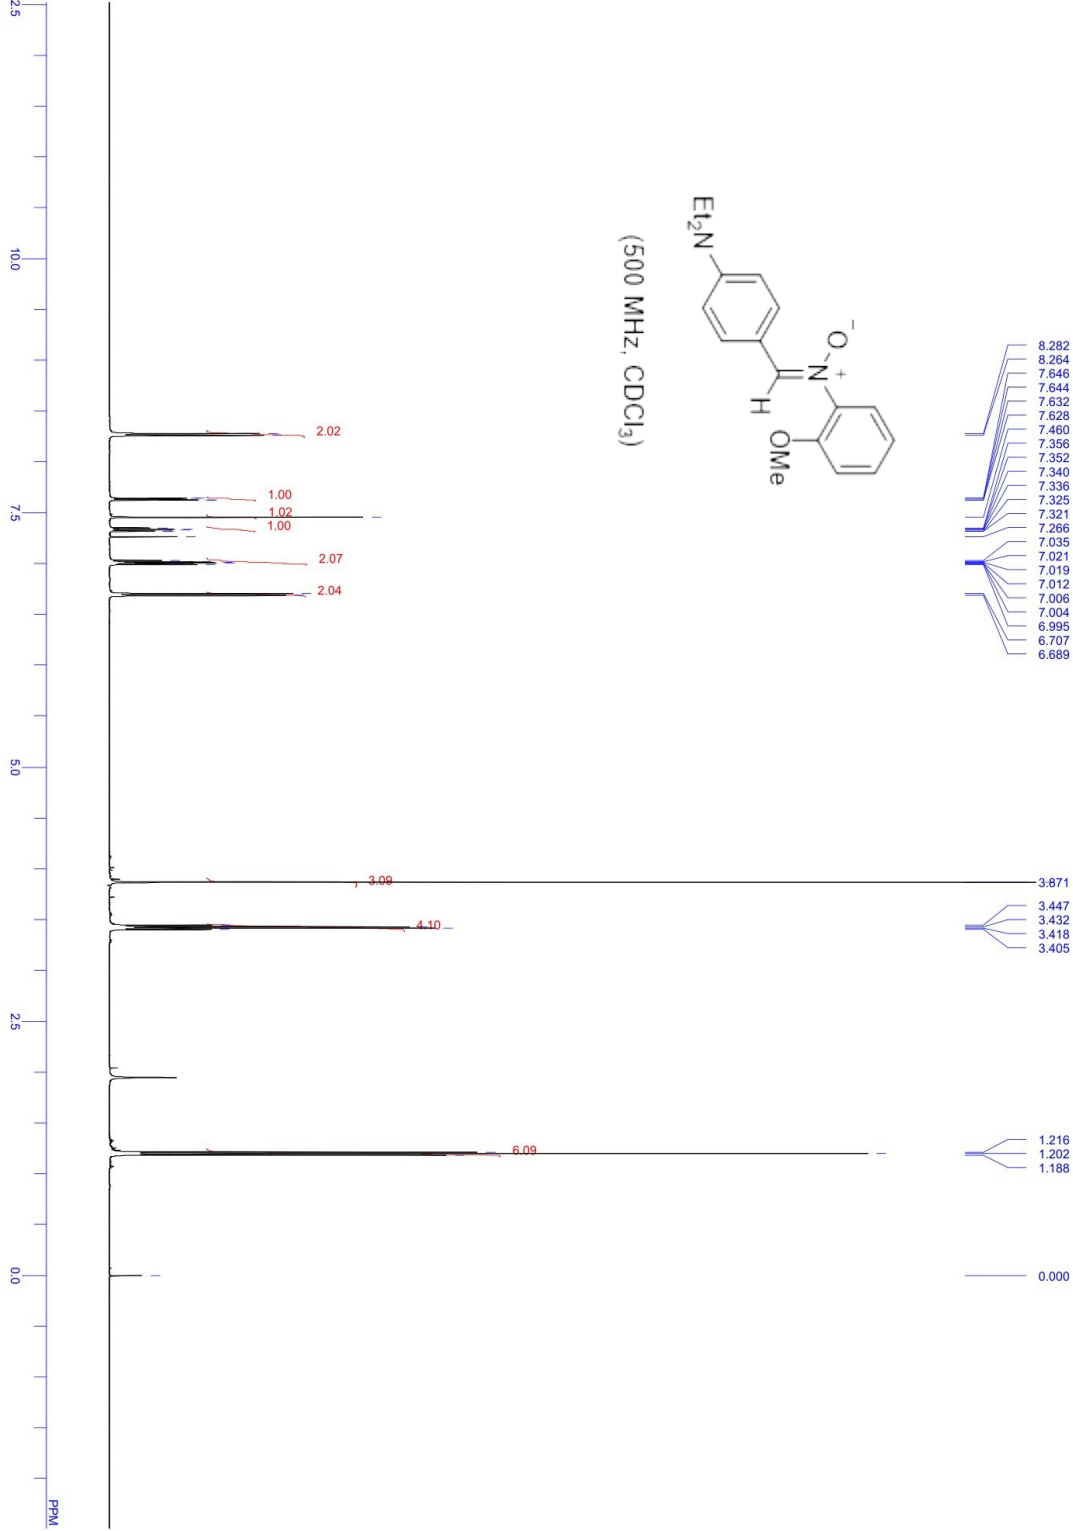

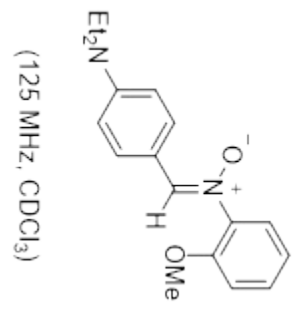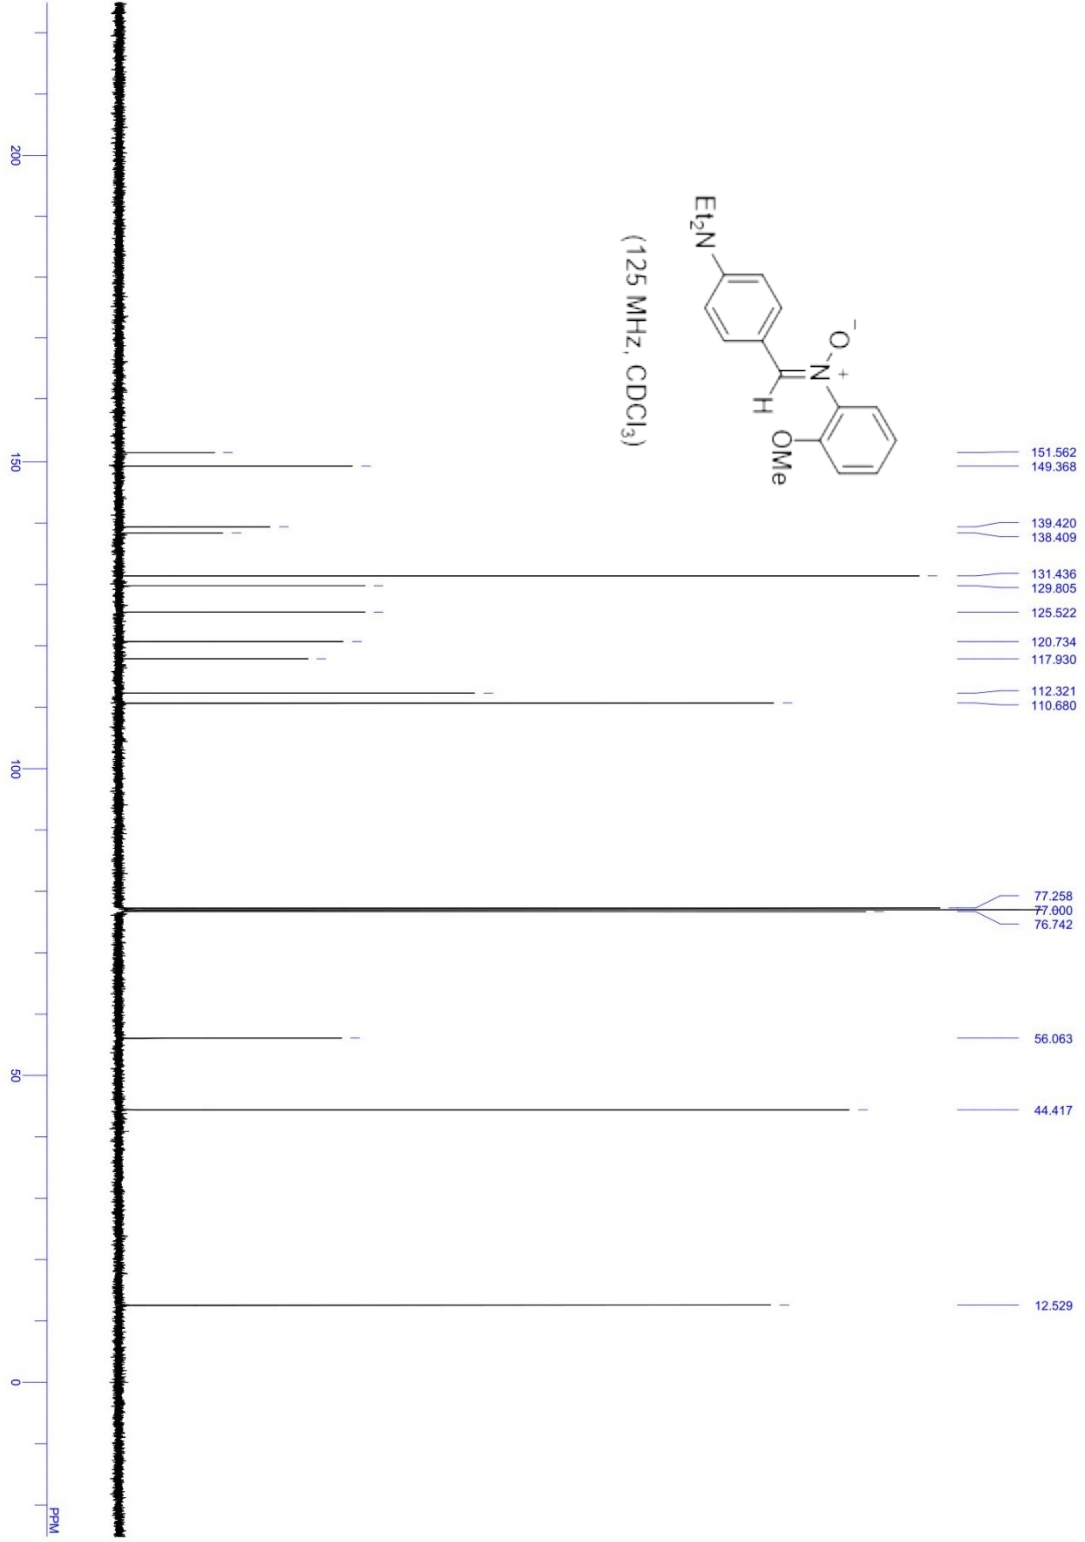

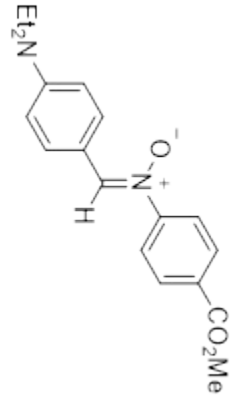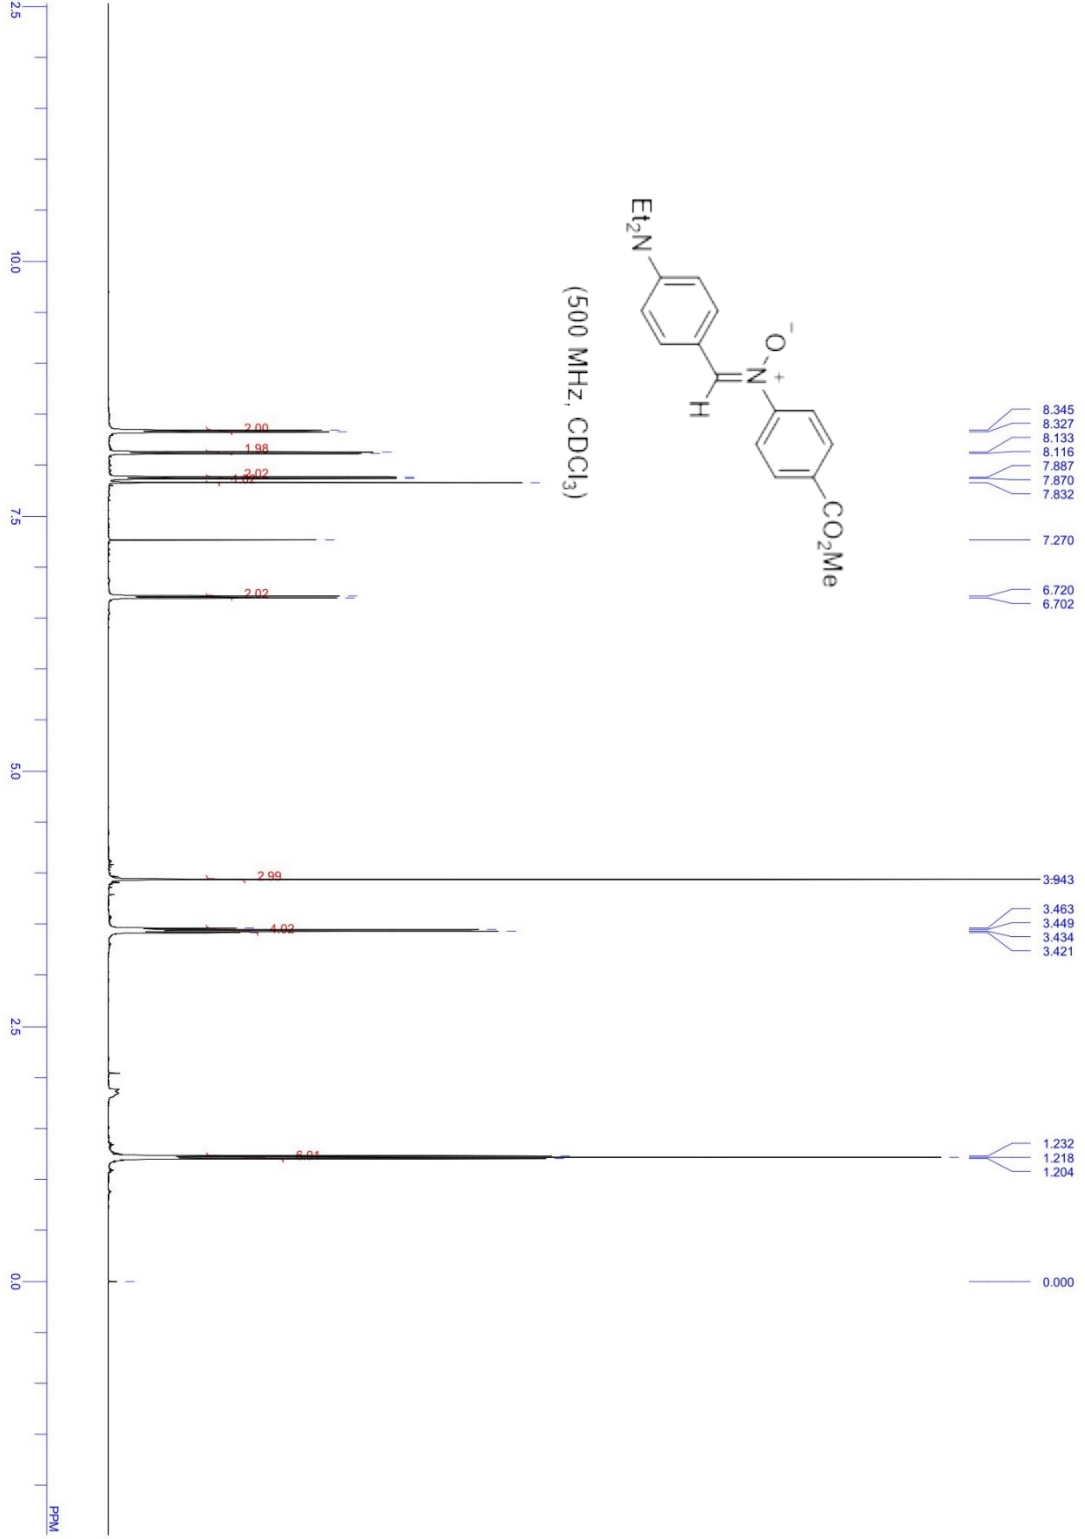

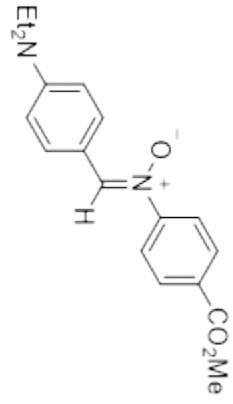

(125 MHz, CDCl<sub>3</sub>)

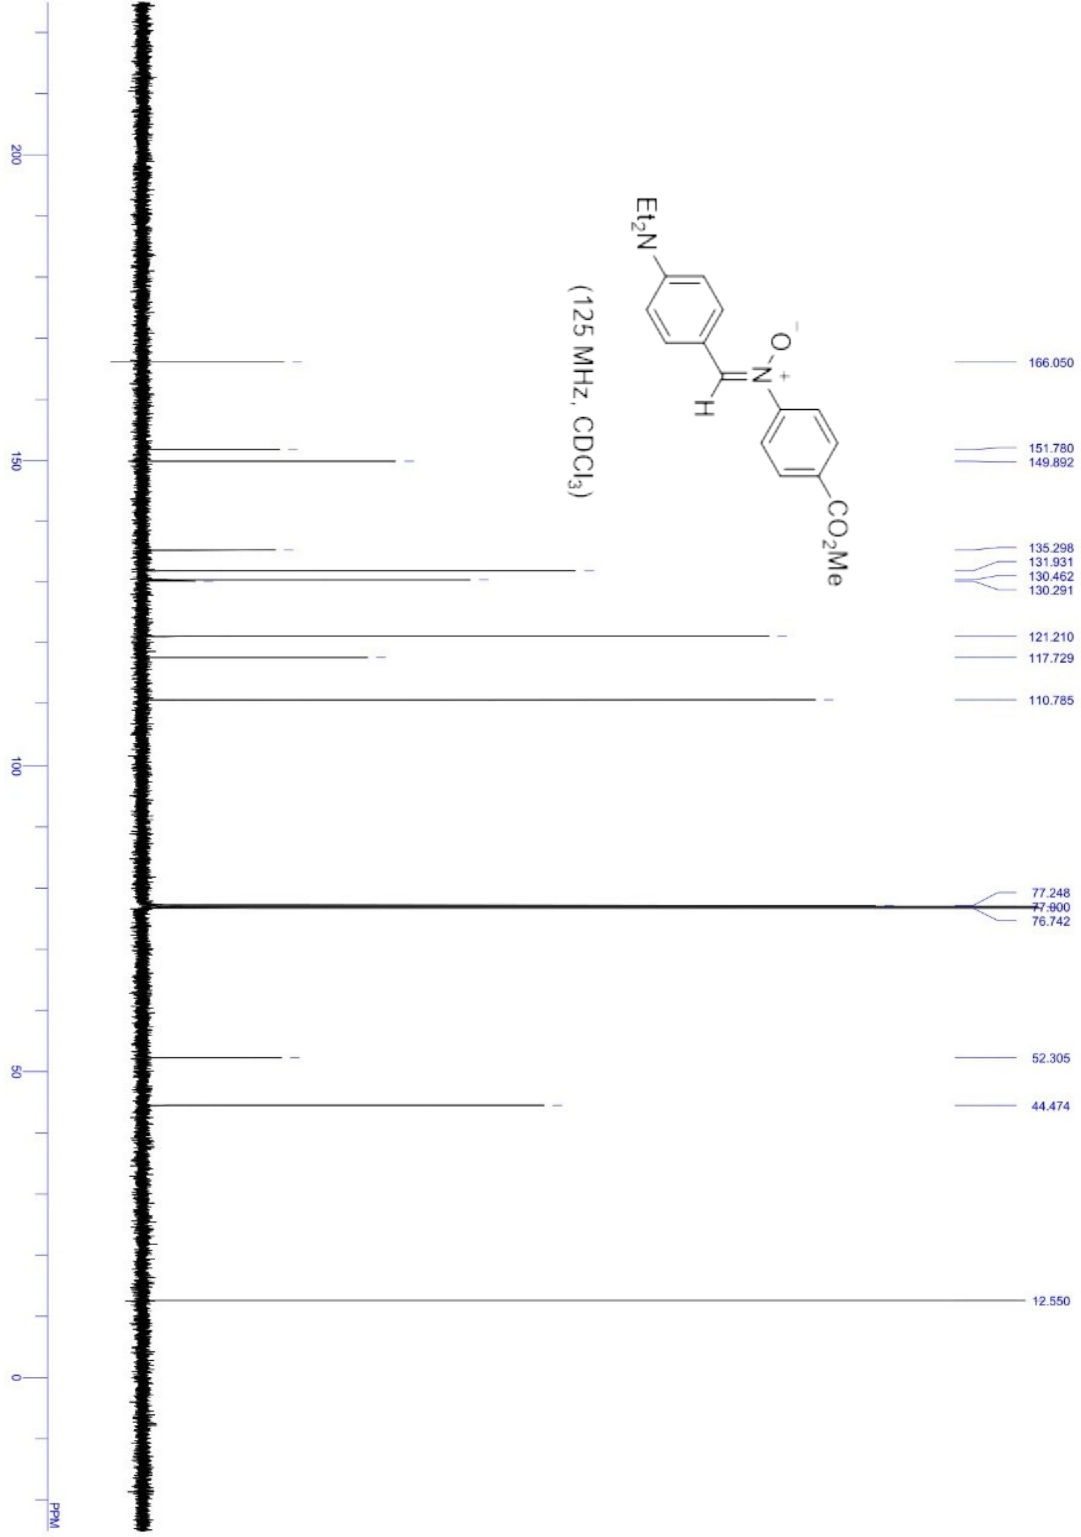



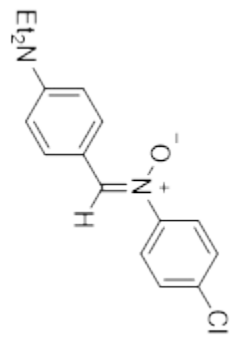

(500 MHz, CDCl<sub>3</sub>)

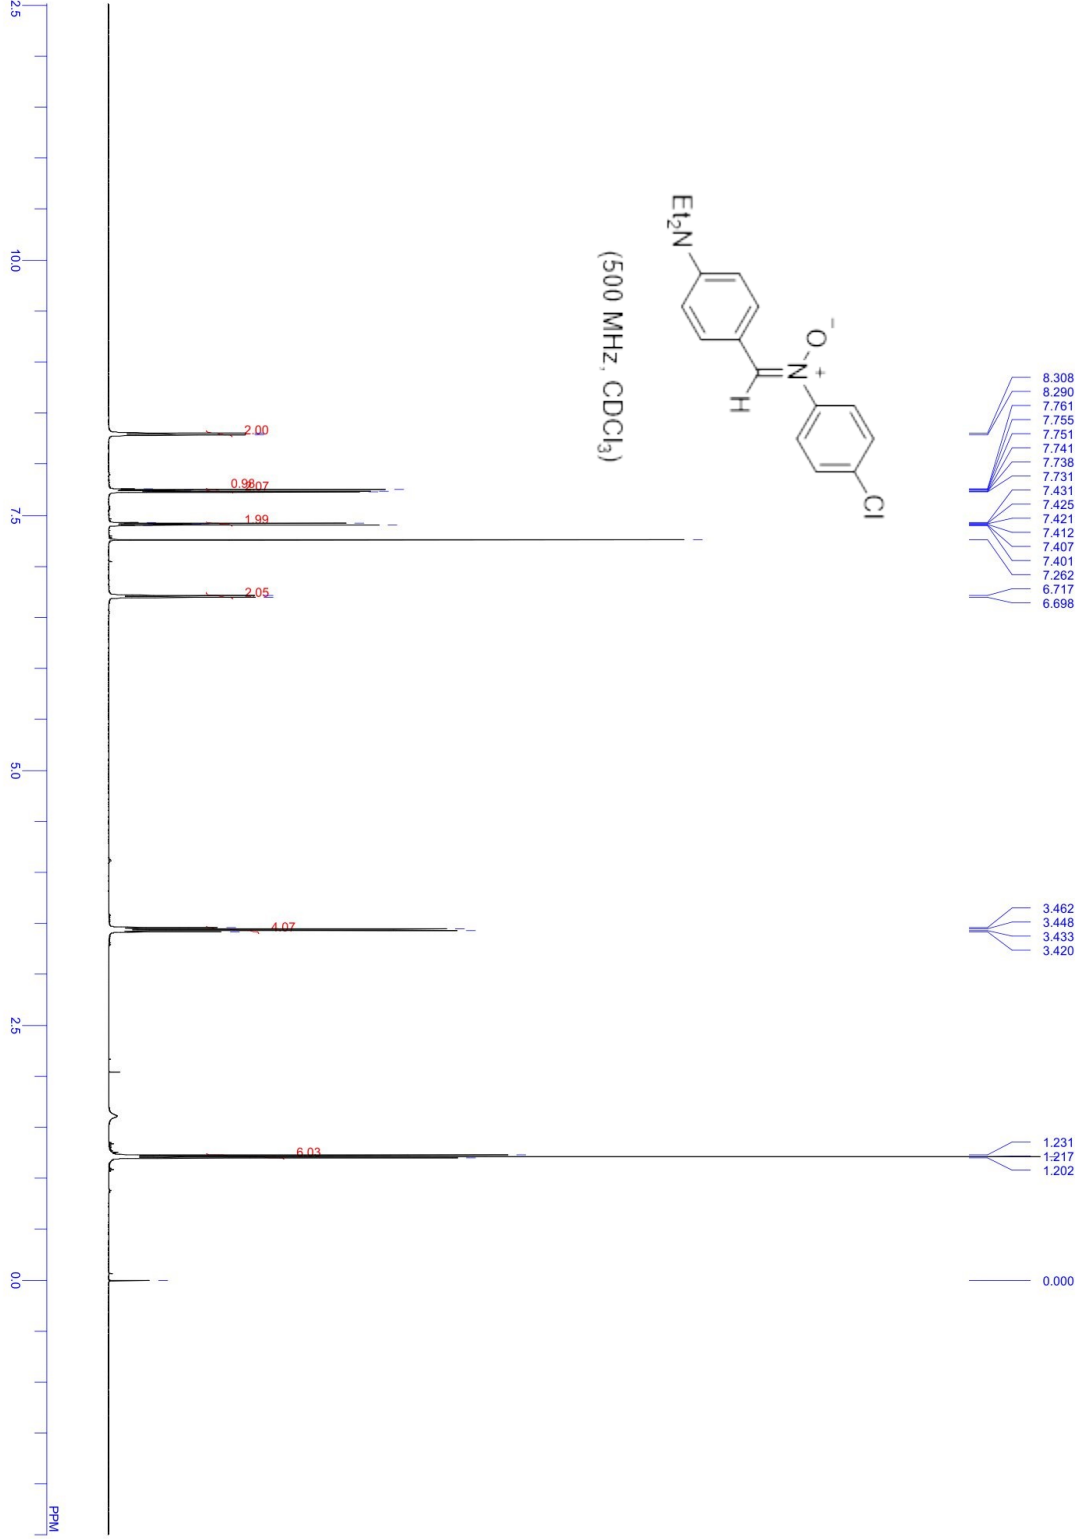

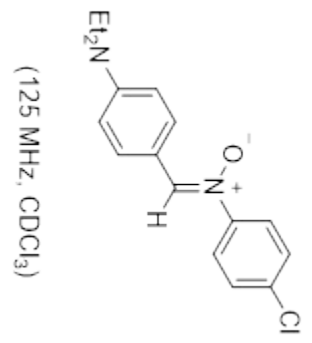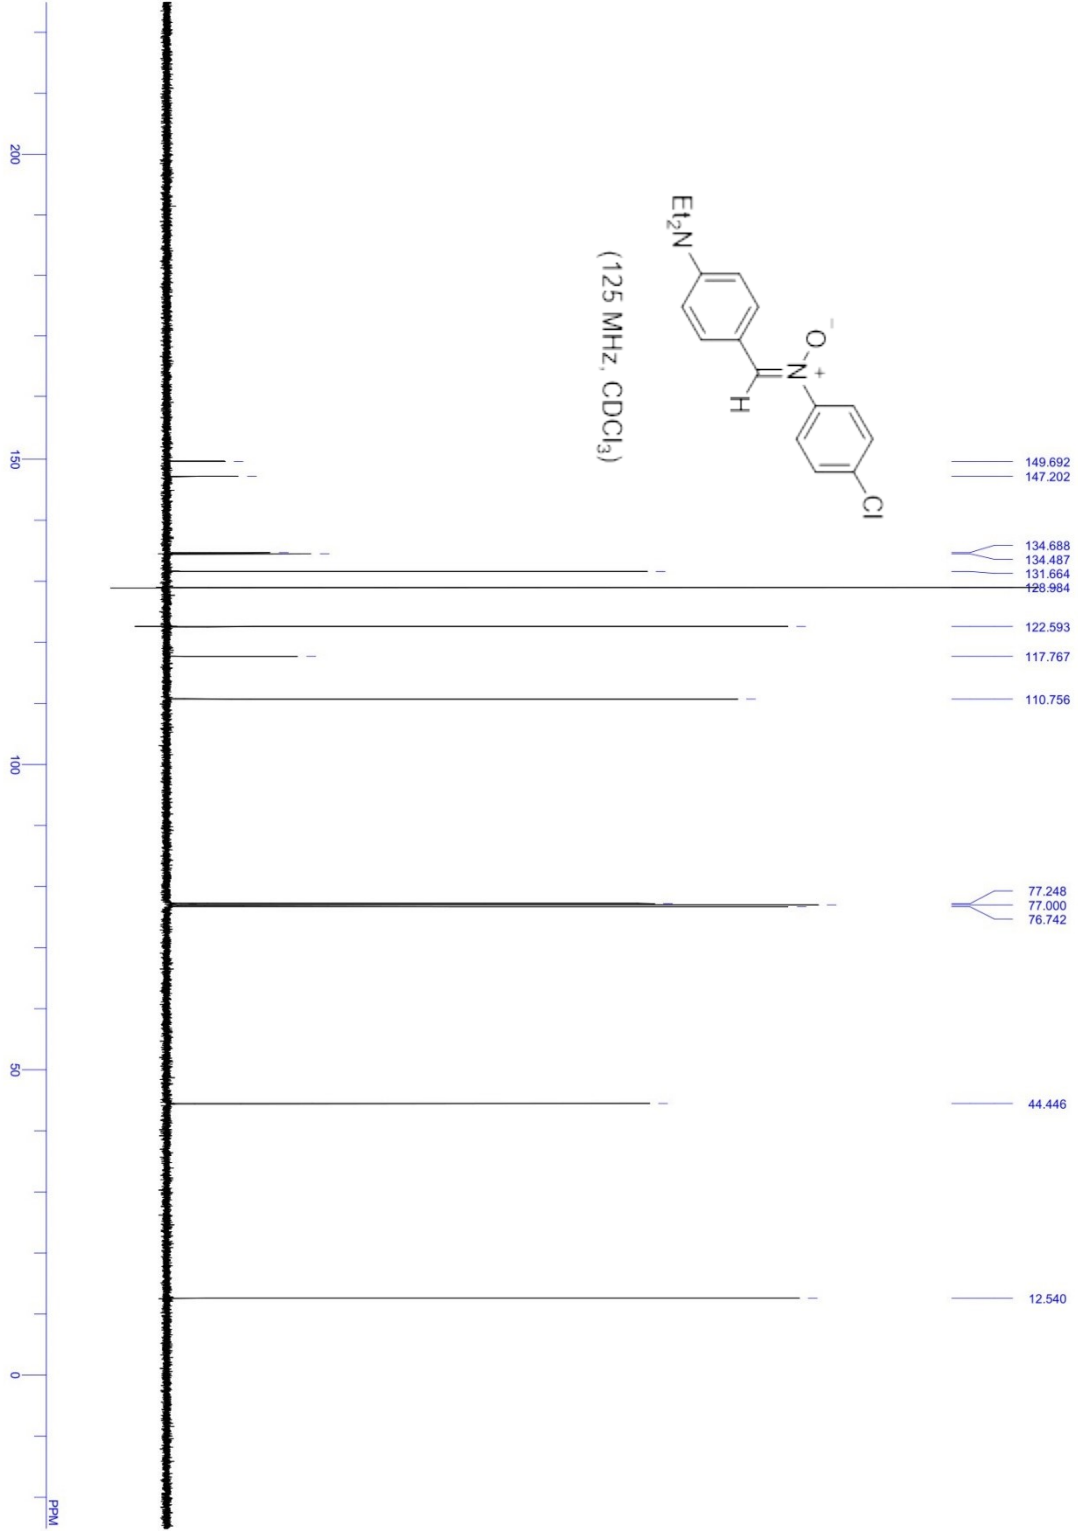

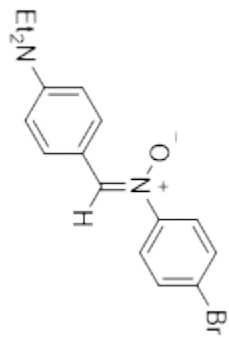

(500 MHz, CDCl<sub>3</sub>)

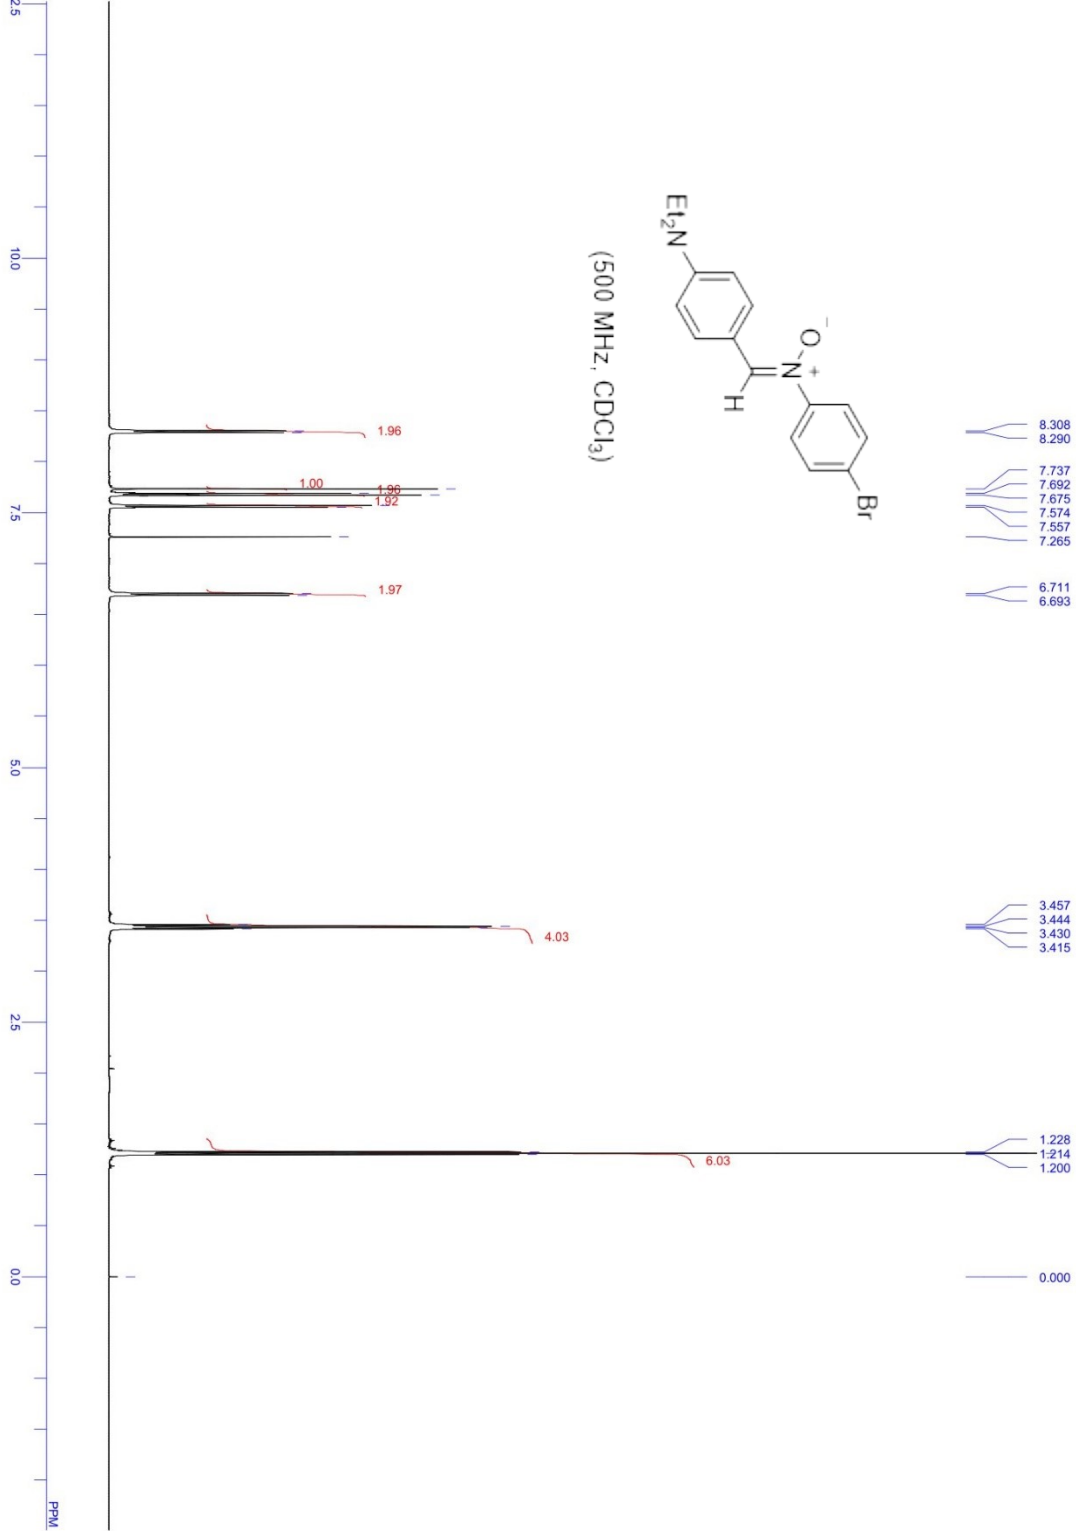

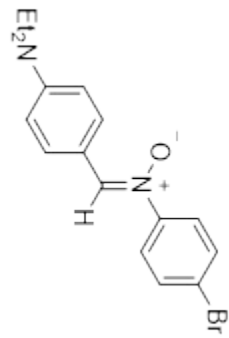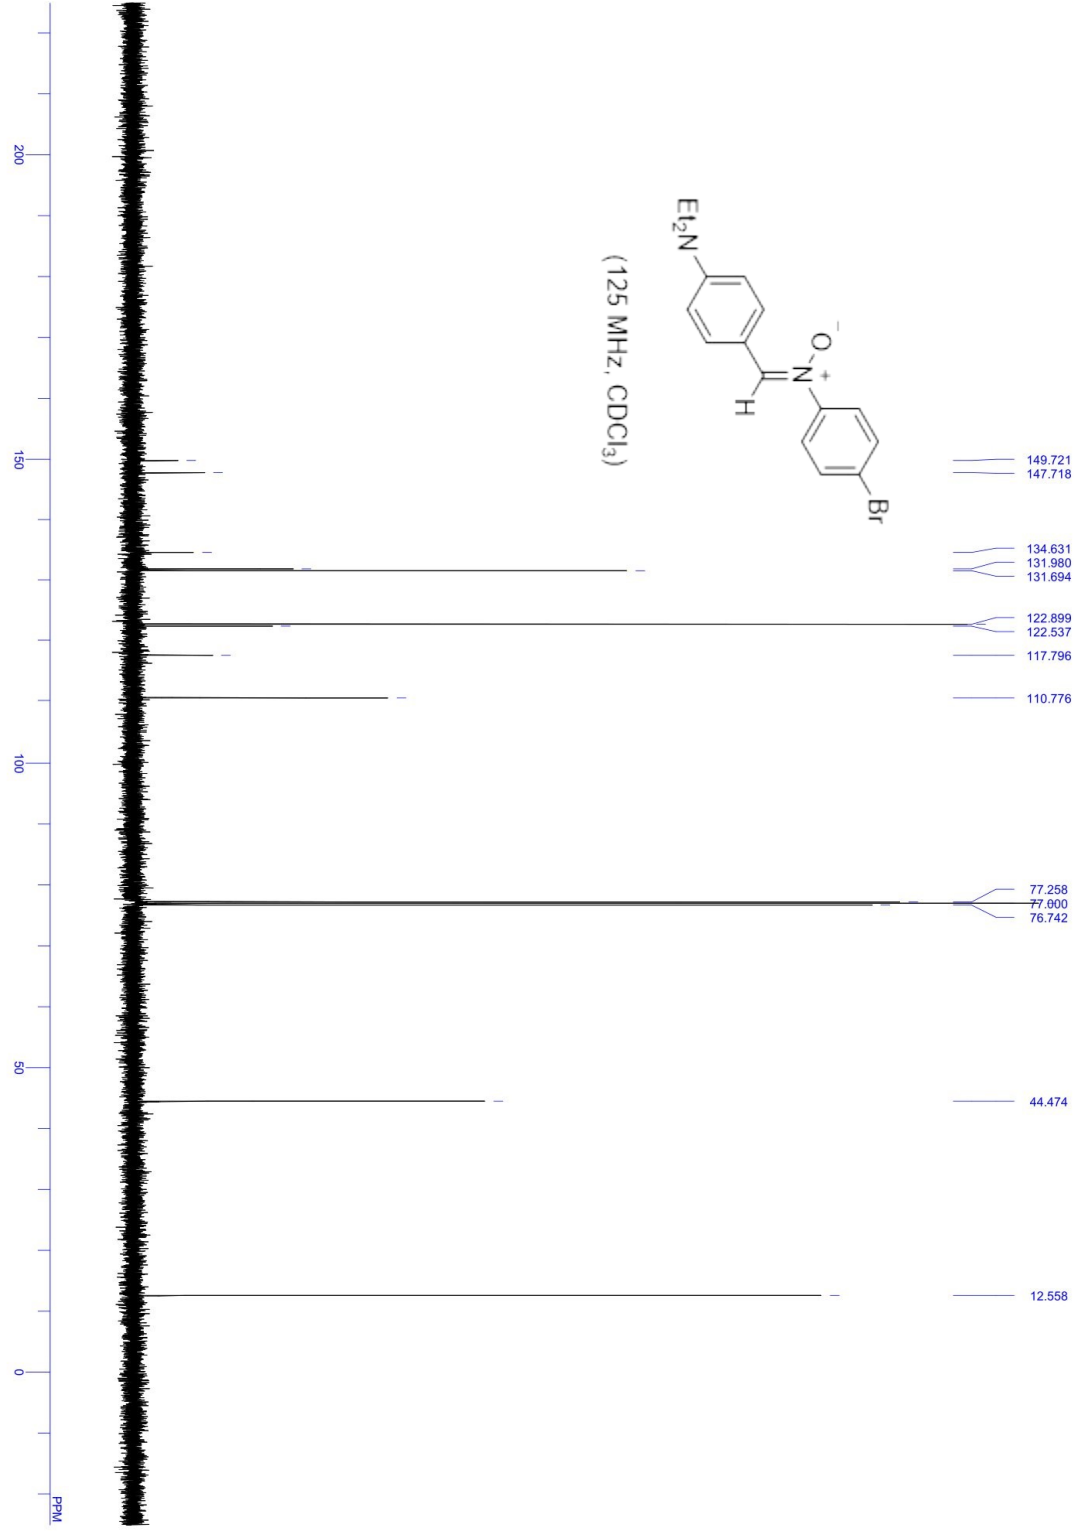

8.306  
8.286  
7.775  
7.764  
7.760  
7.736  
7.563  
7.558  
7.545  
7.540  
7.535  
7.264  
6.709  
6.690

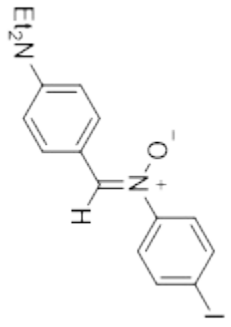

(500 MHz, CDCl<sub>3</sub>)

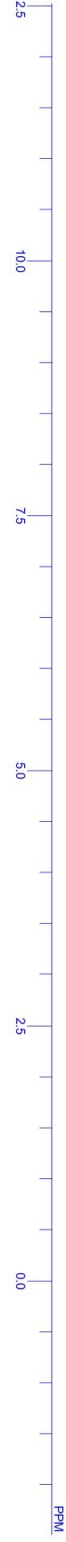

3.456  
3.442  
3.428  
3.414

1.226  
1.213  
1.199

0.000

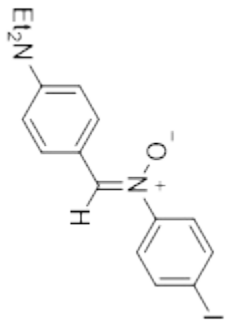

(125 MHz, CDCl<sub>3</sub>)

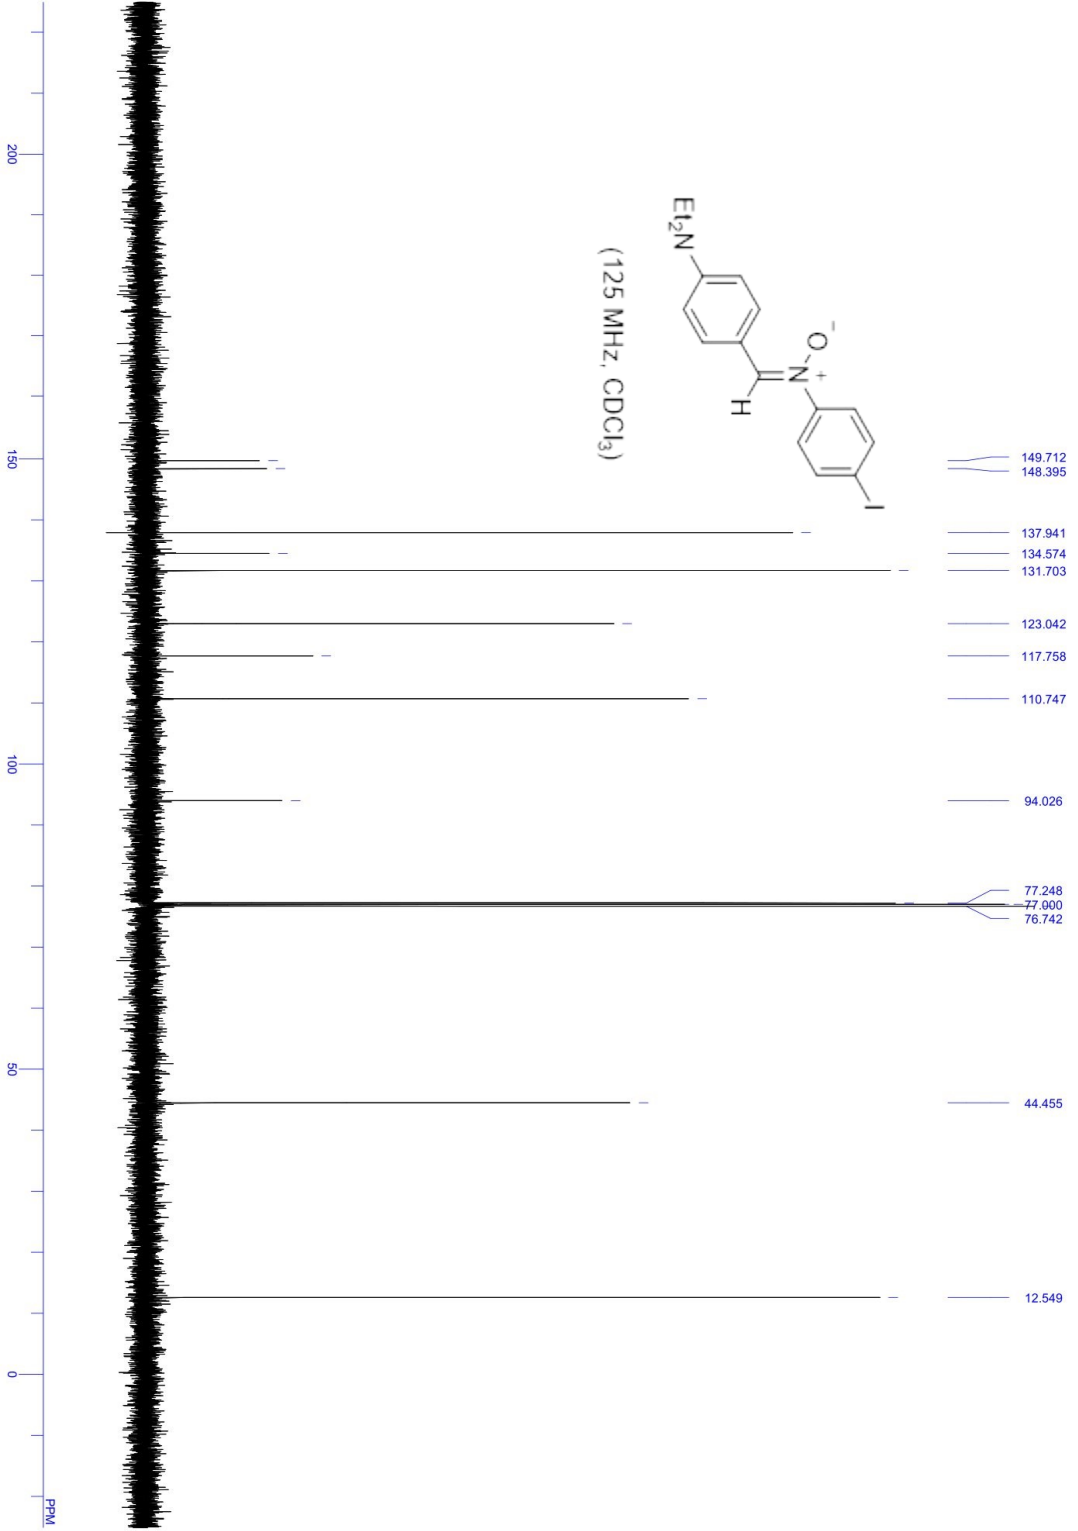

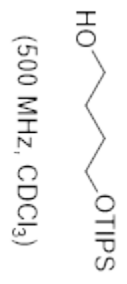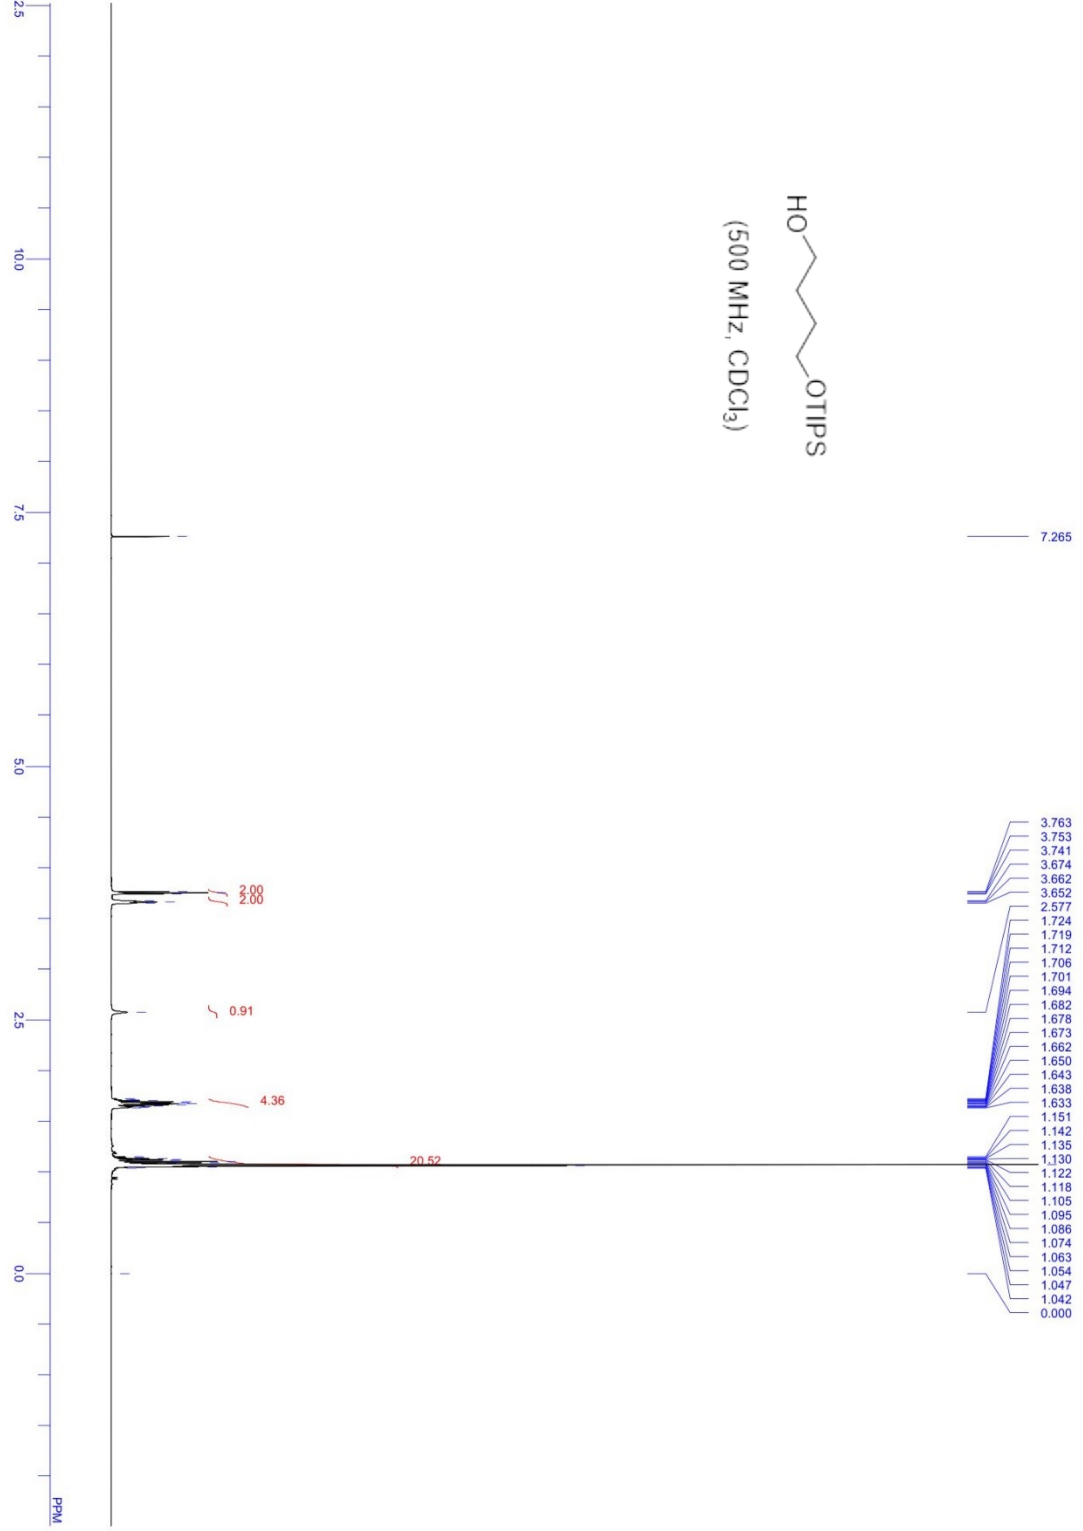

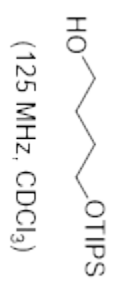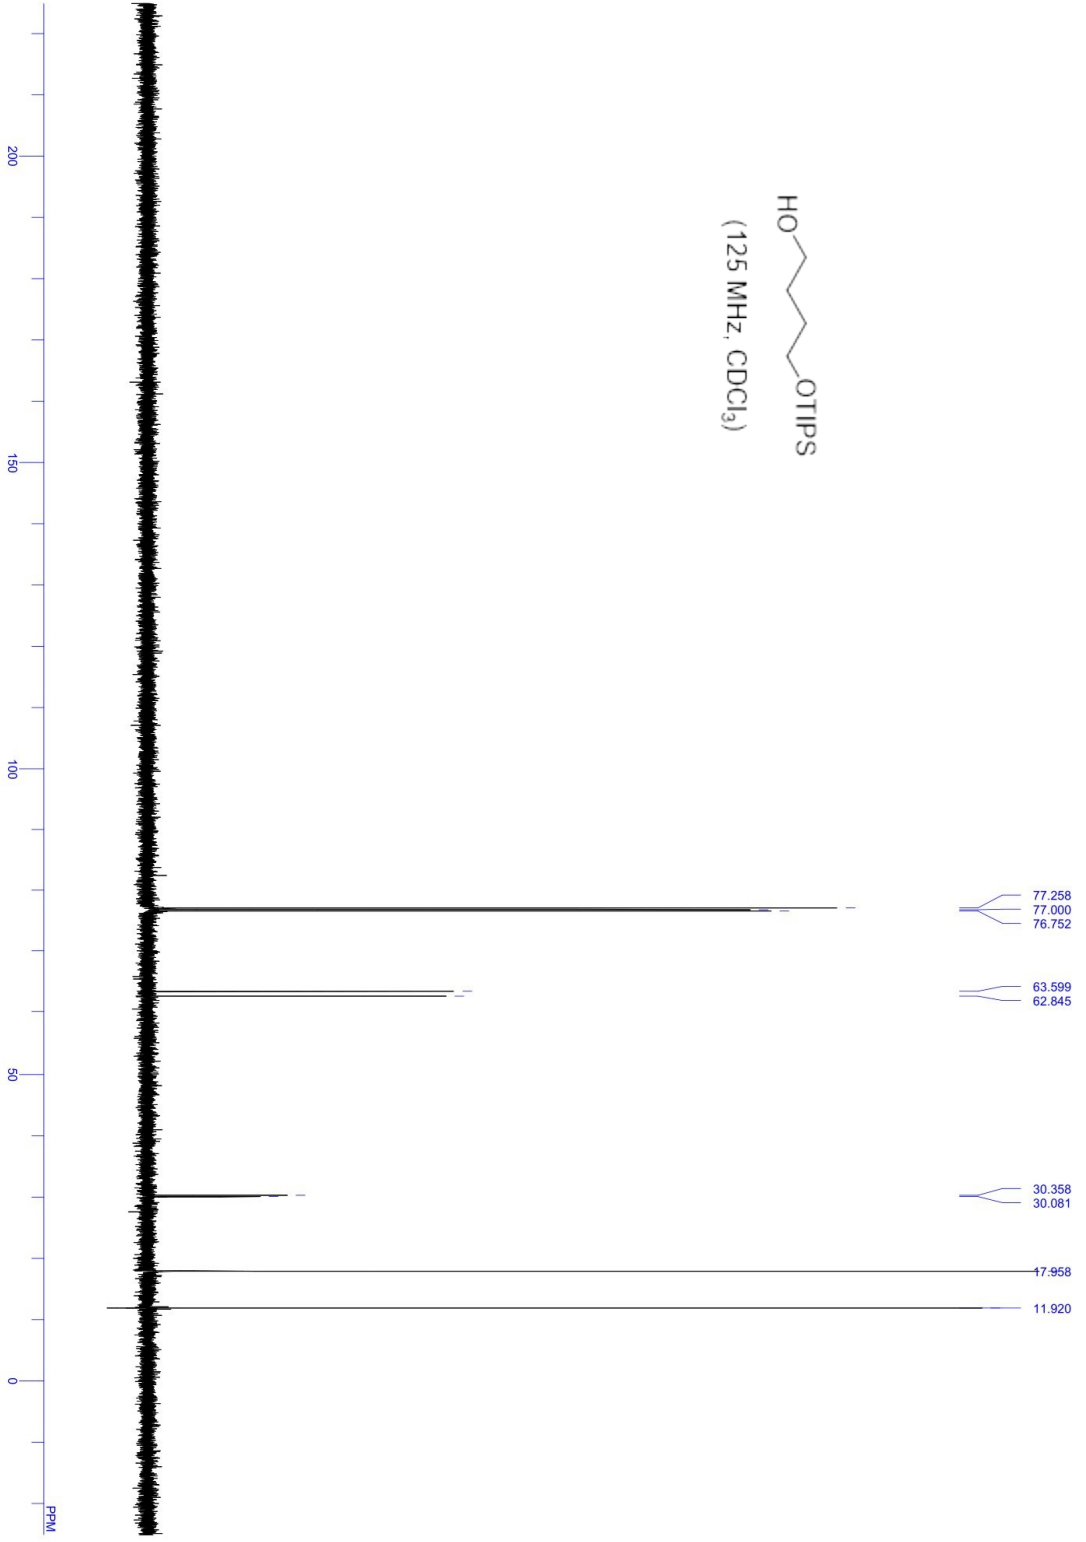



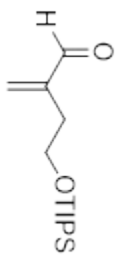

(500 MHz, CDCl<sub>3</sub>)

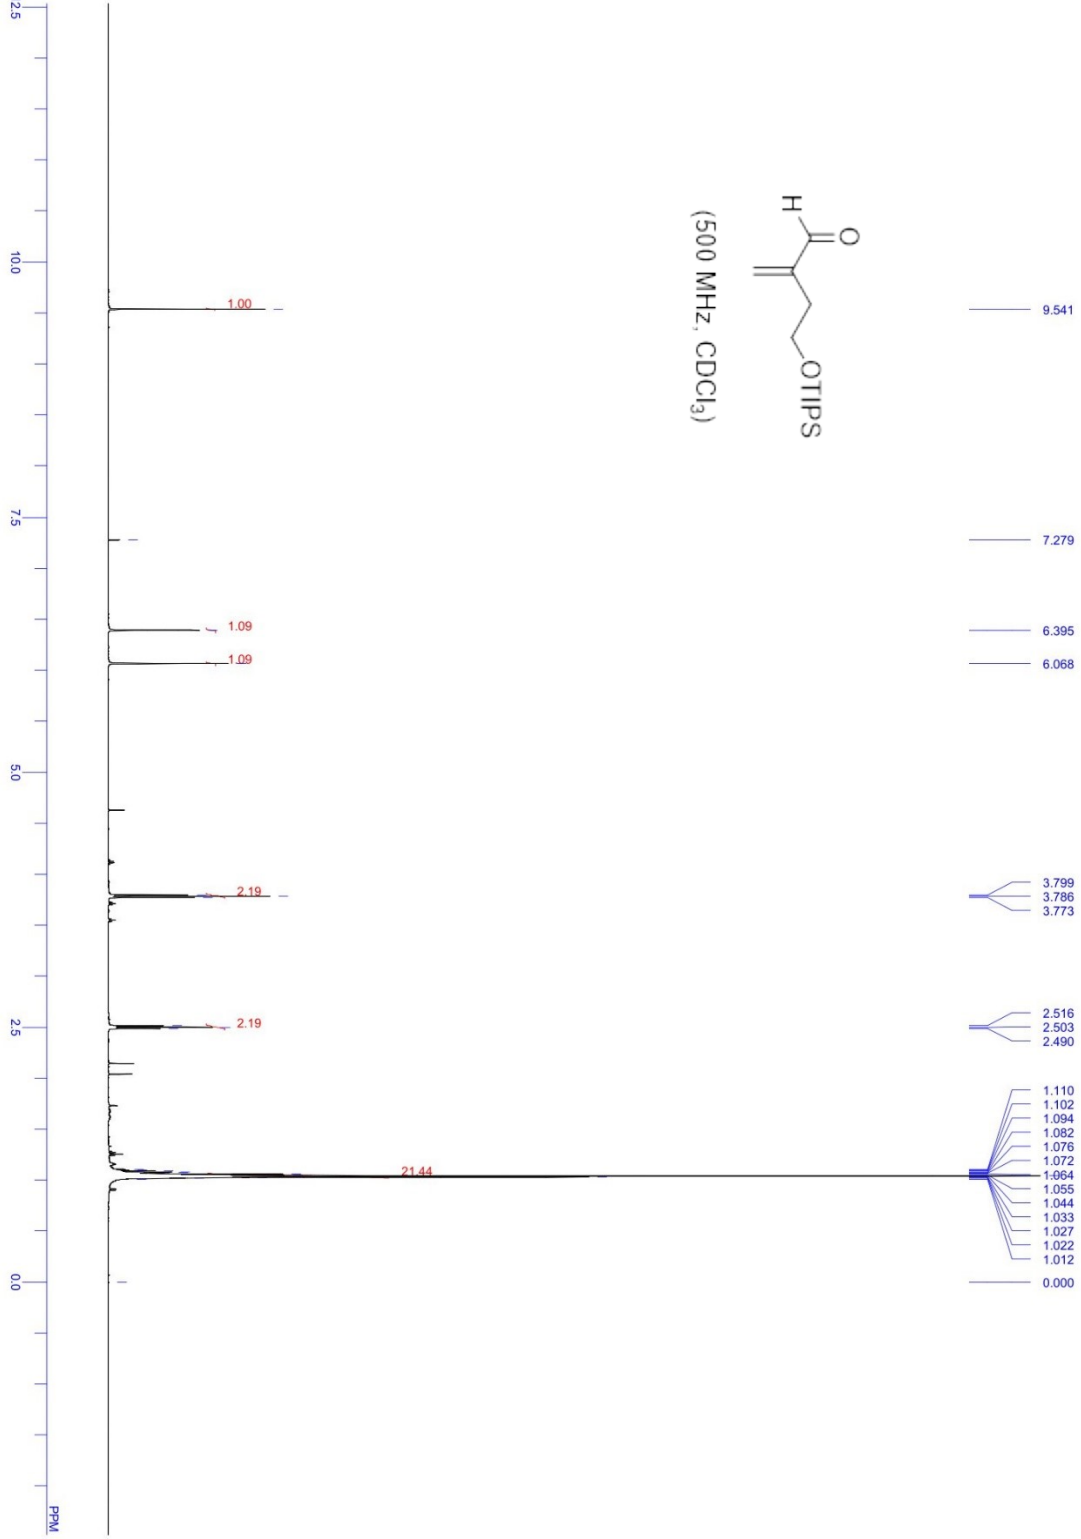

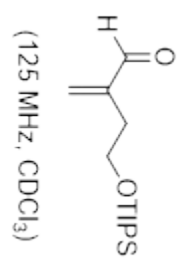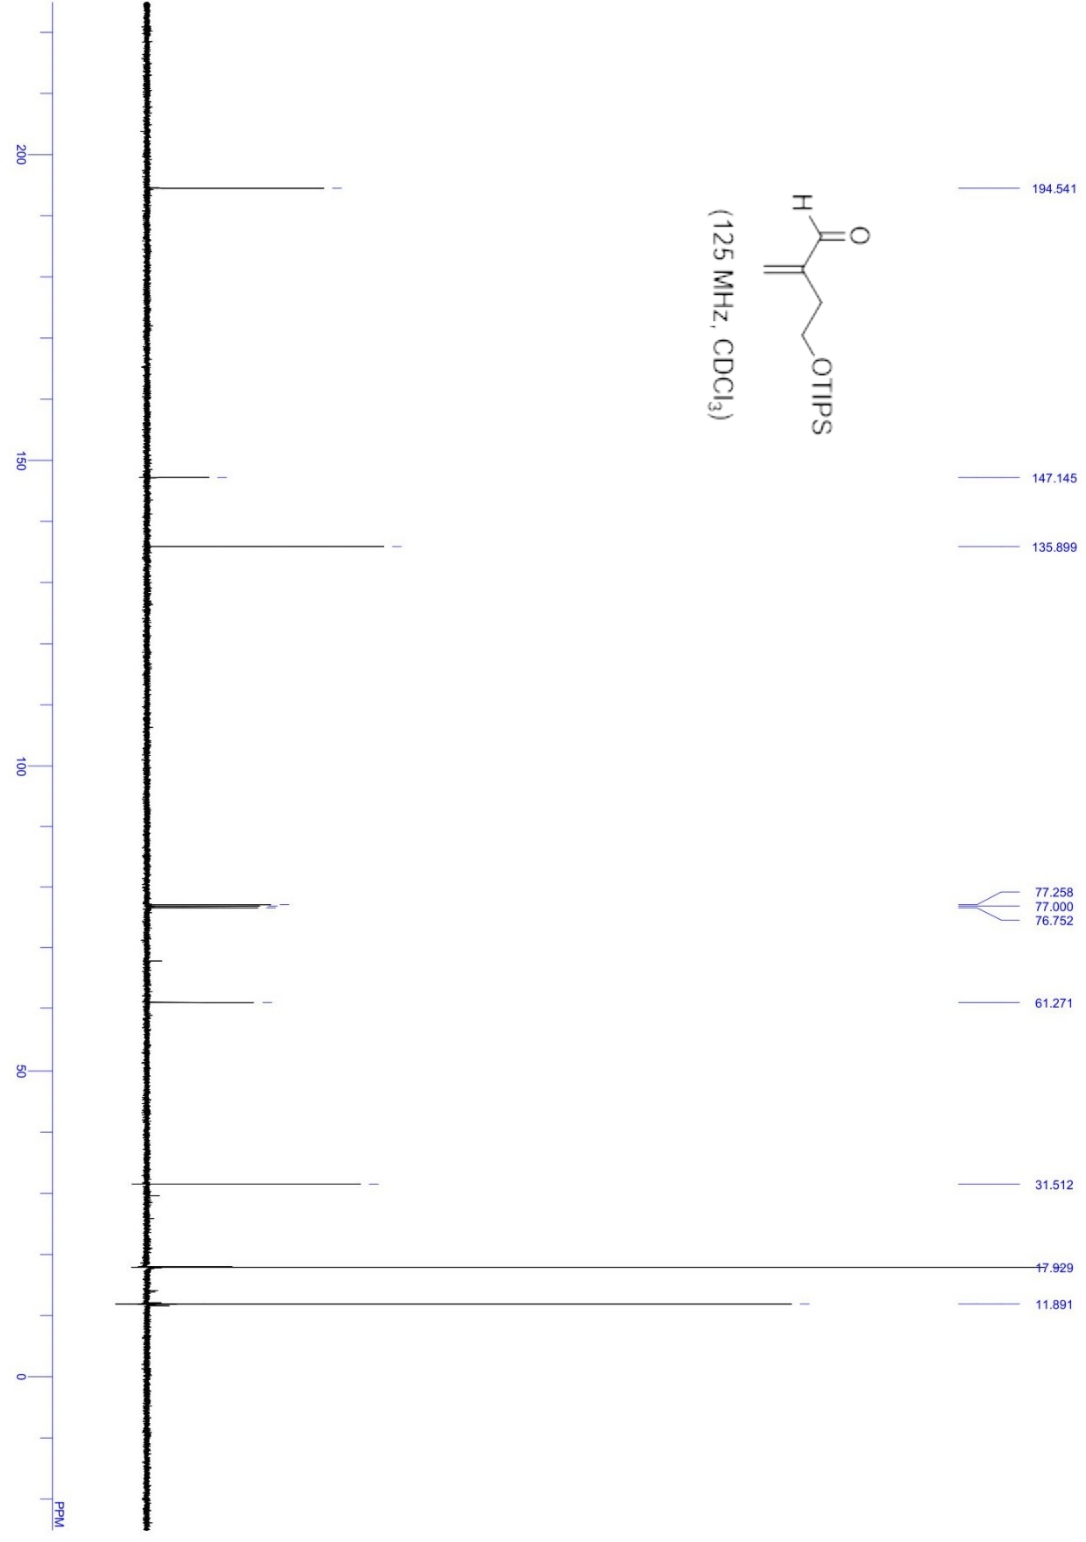

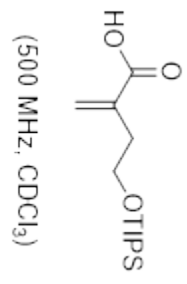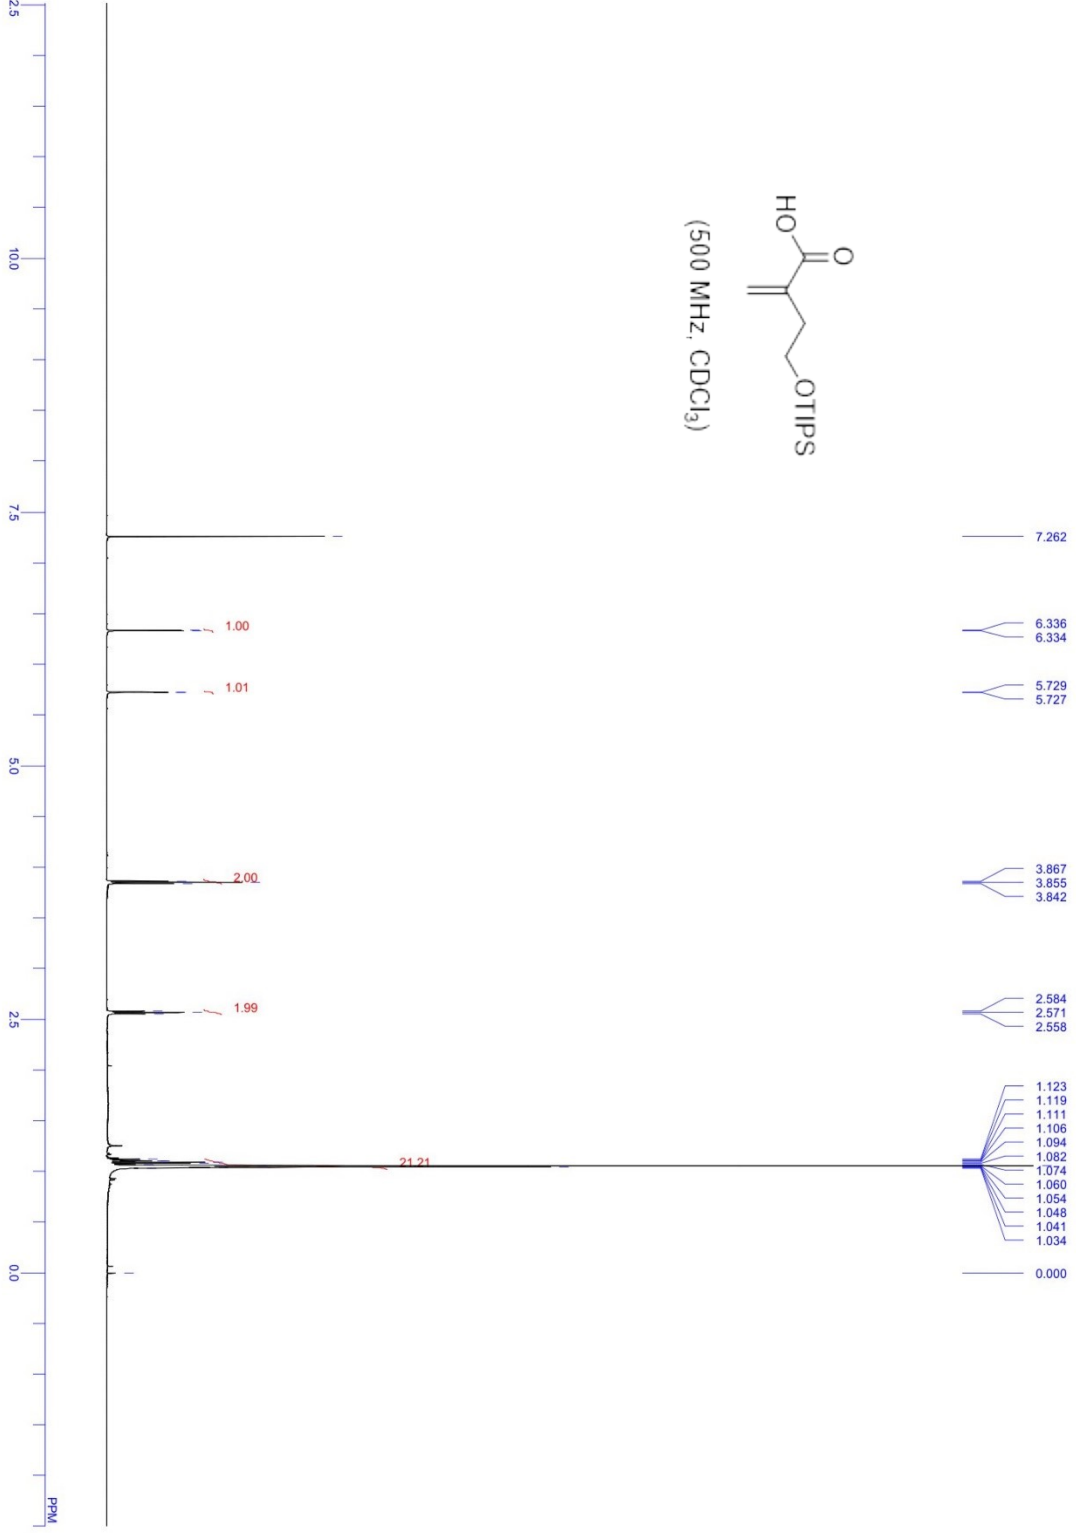

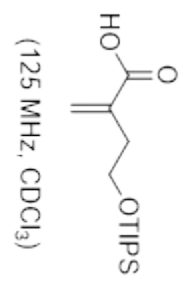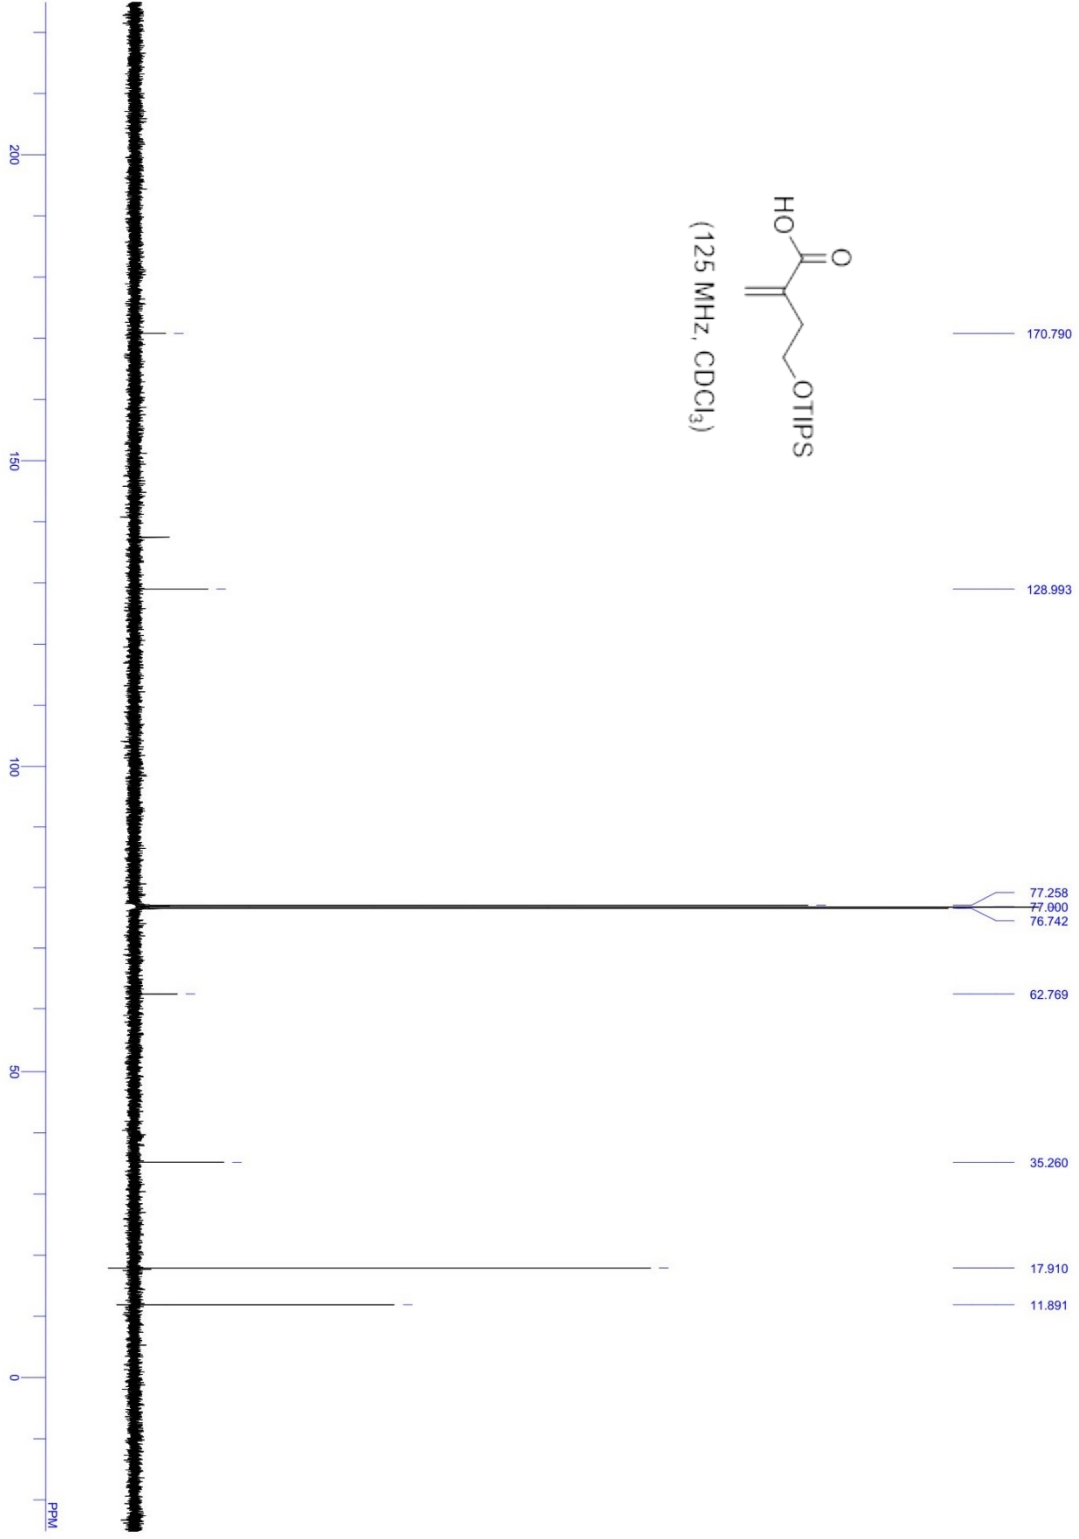

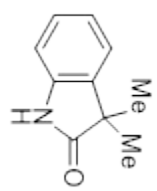

3a  
(500 MHz, CDCl<sub>3</sub>)

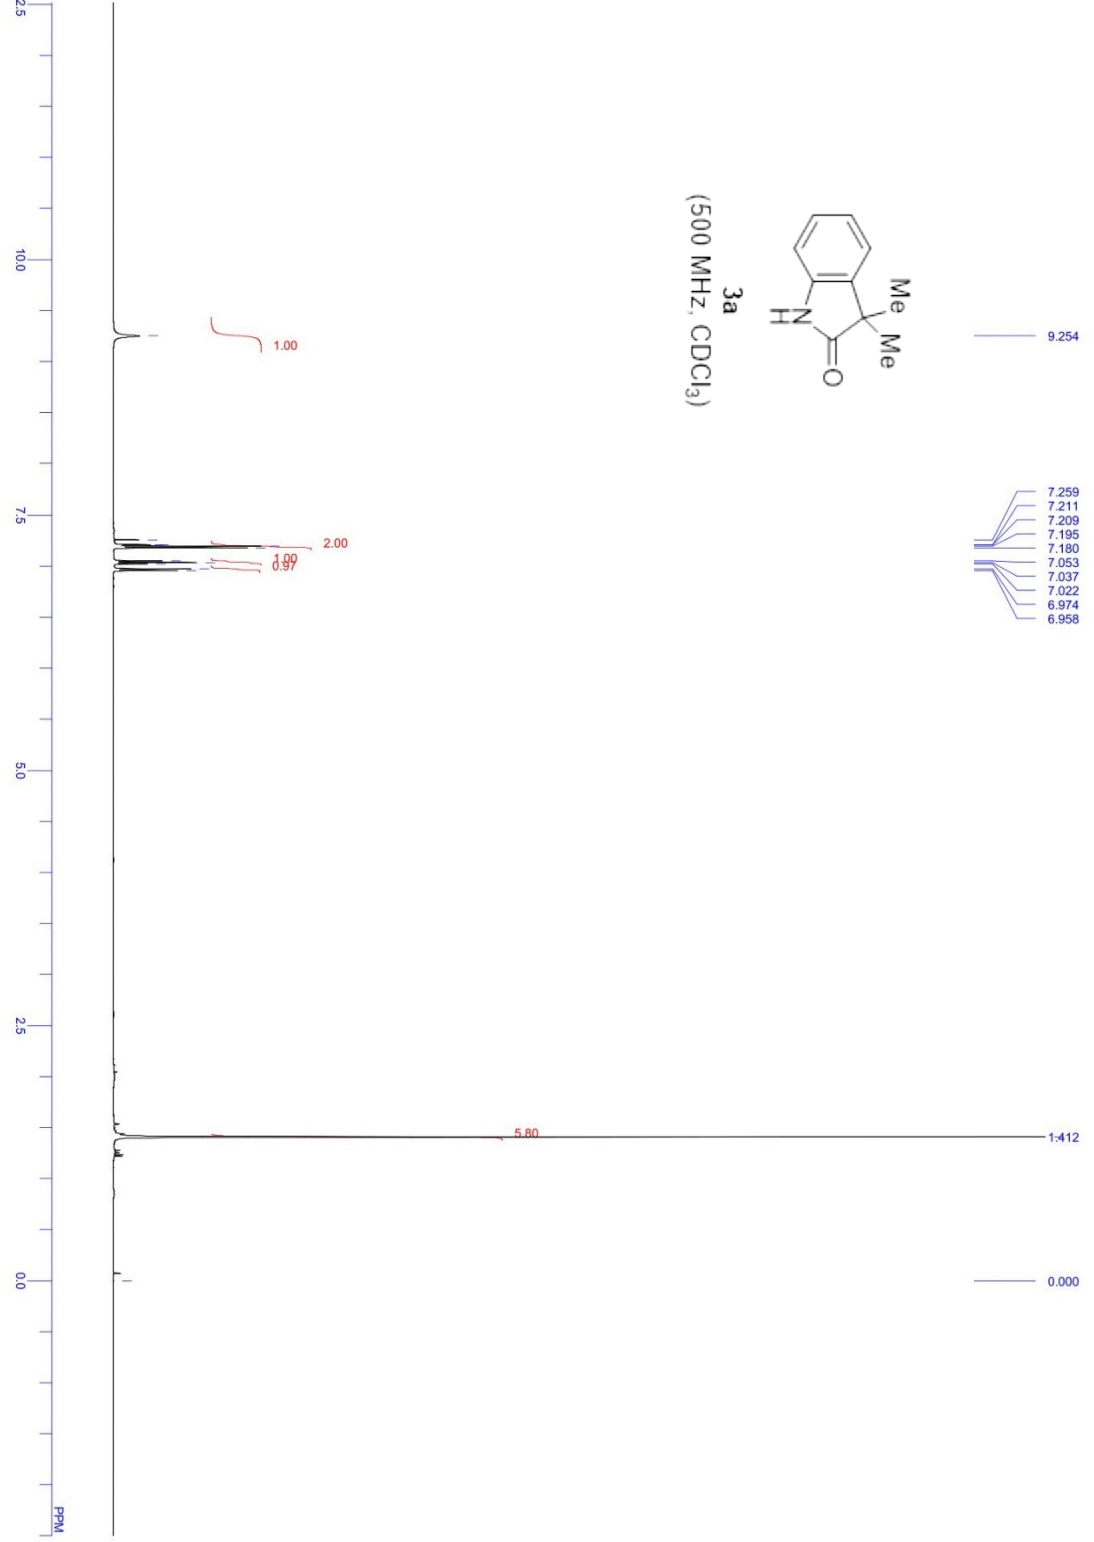

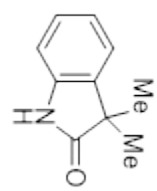

(125 MHz, CDCl<sub>3</sub>)

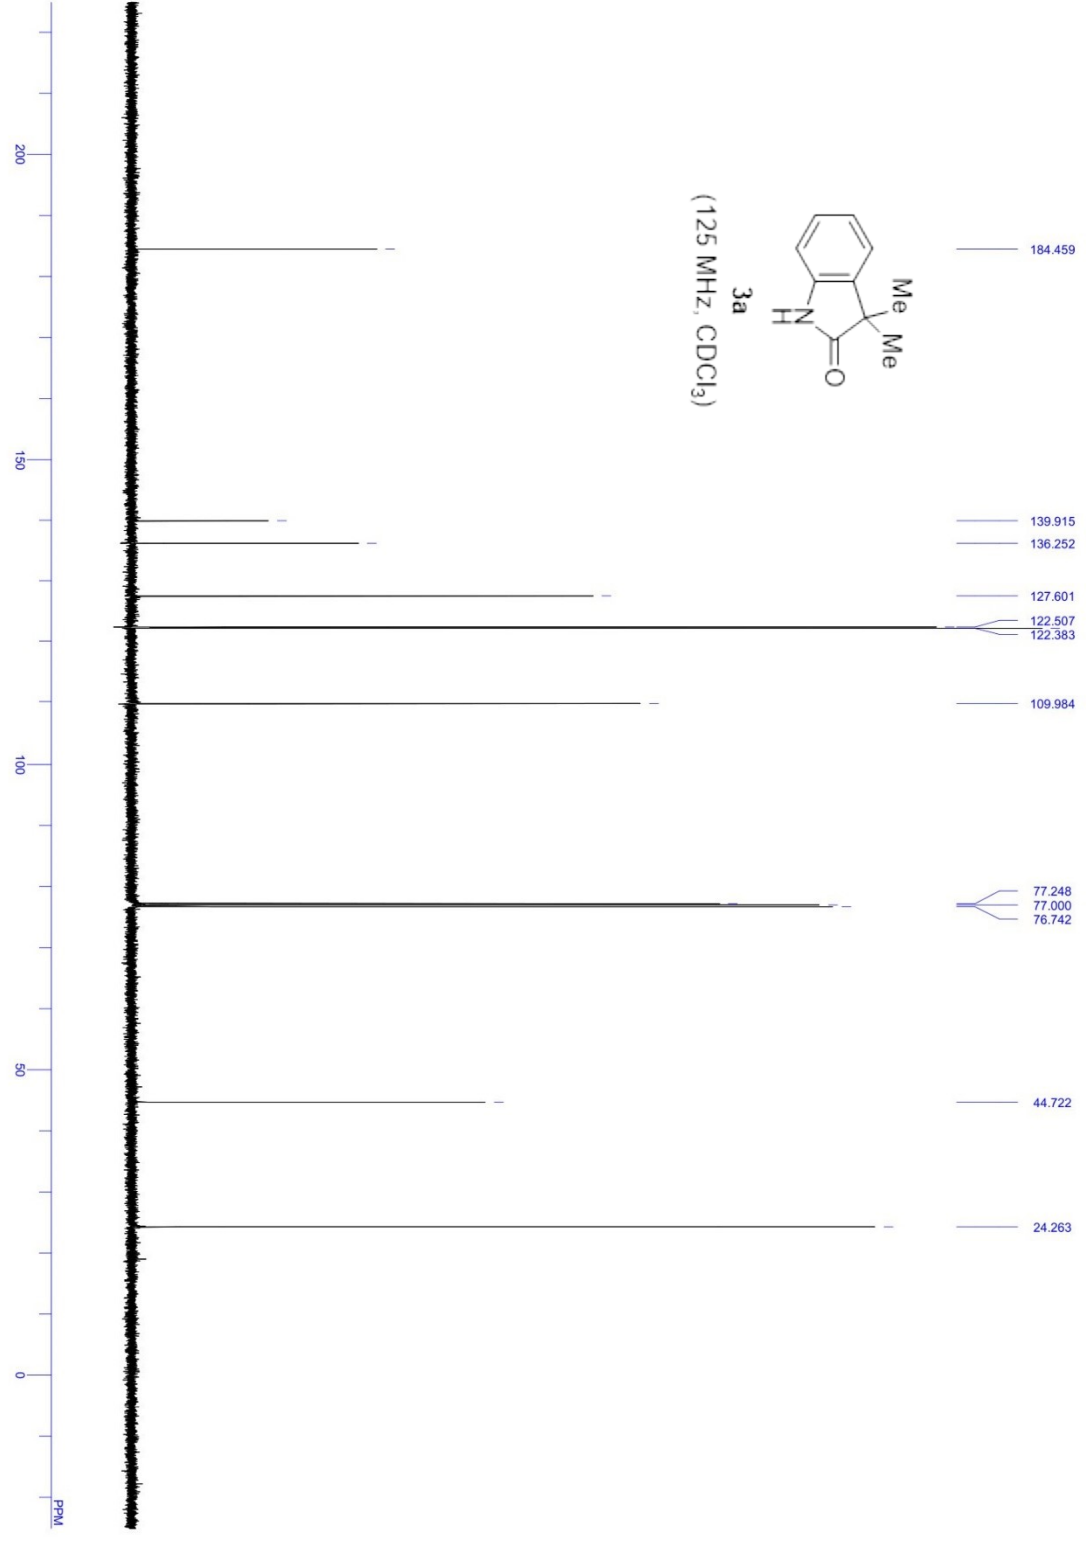

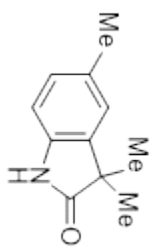

**3b**  
(500 MHz, CDCl<sub>3</sub>)

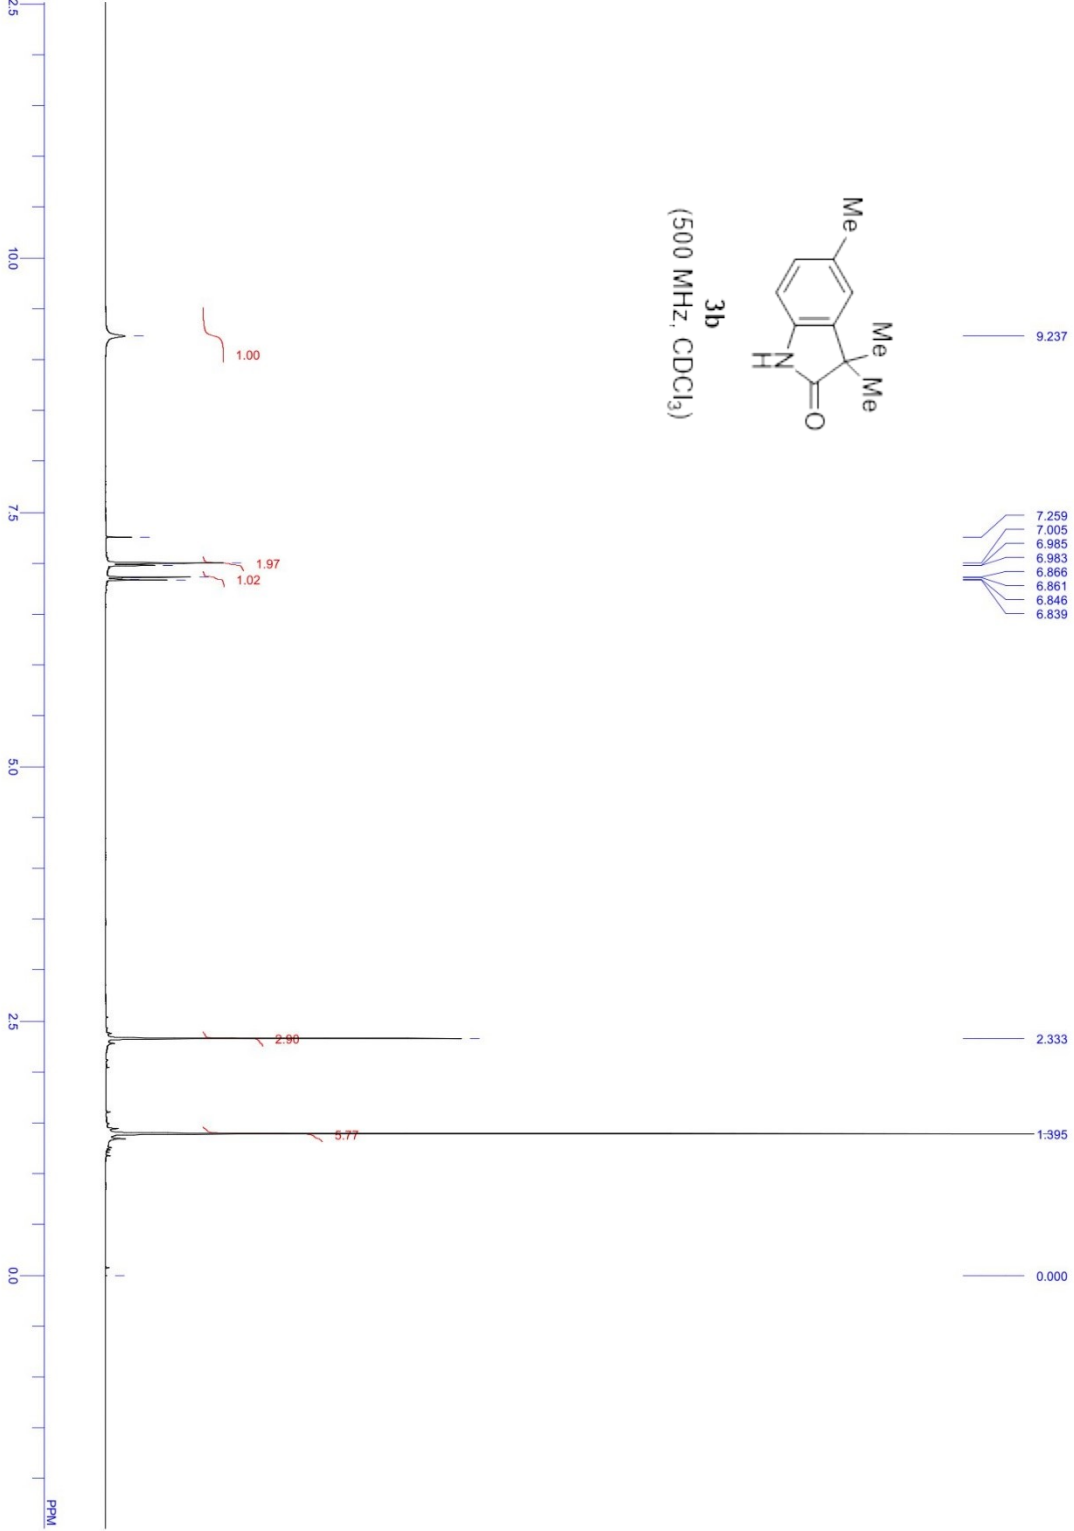

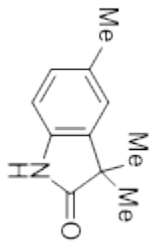

(125 MHz, CDCl<sub>3</sub>)

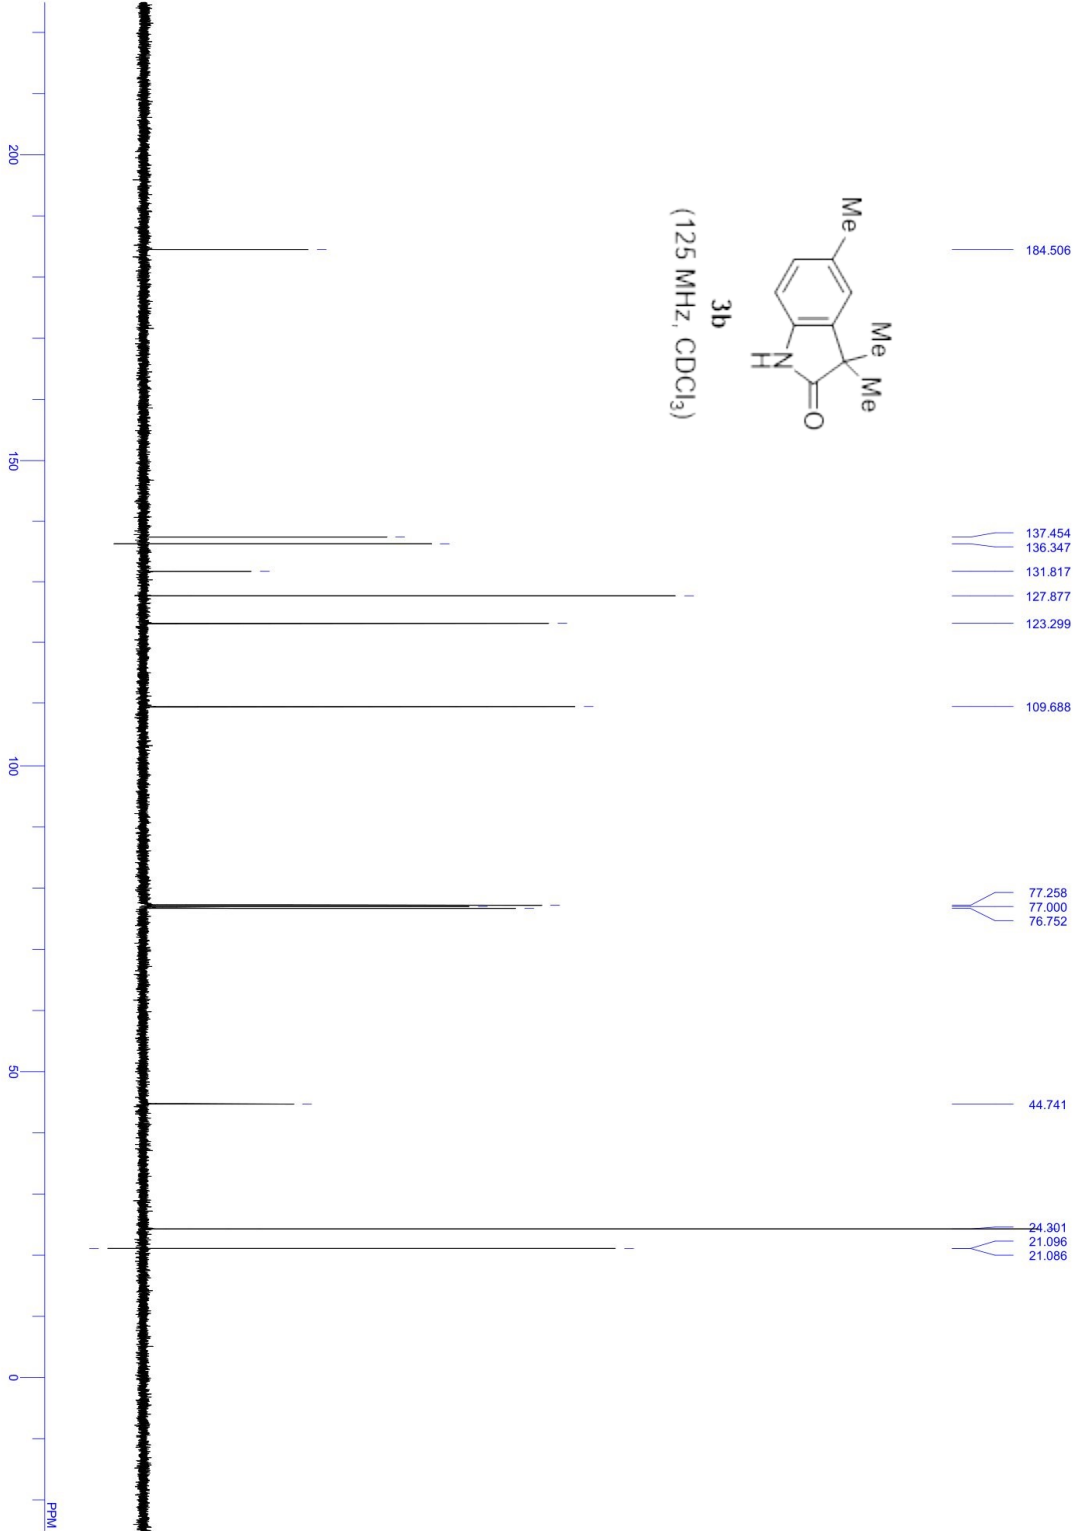



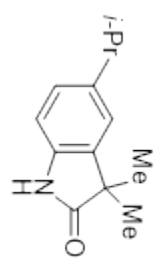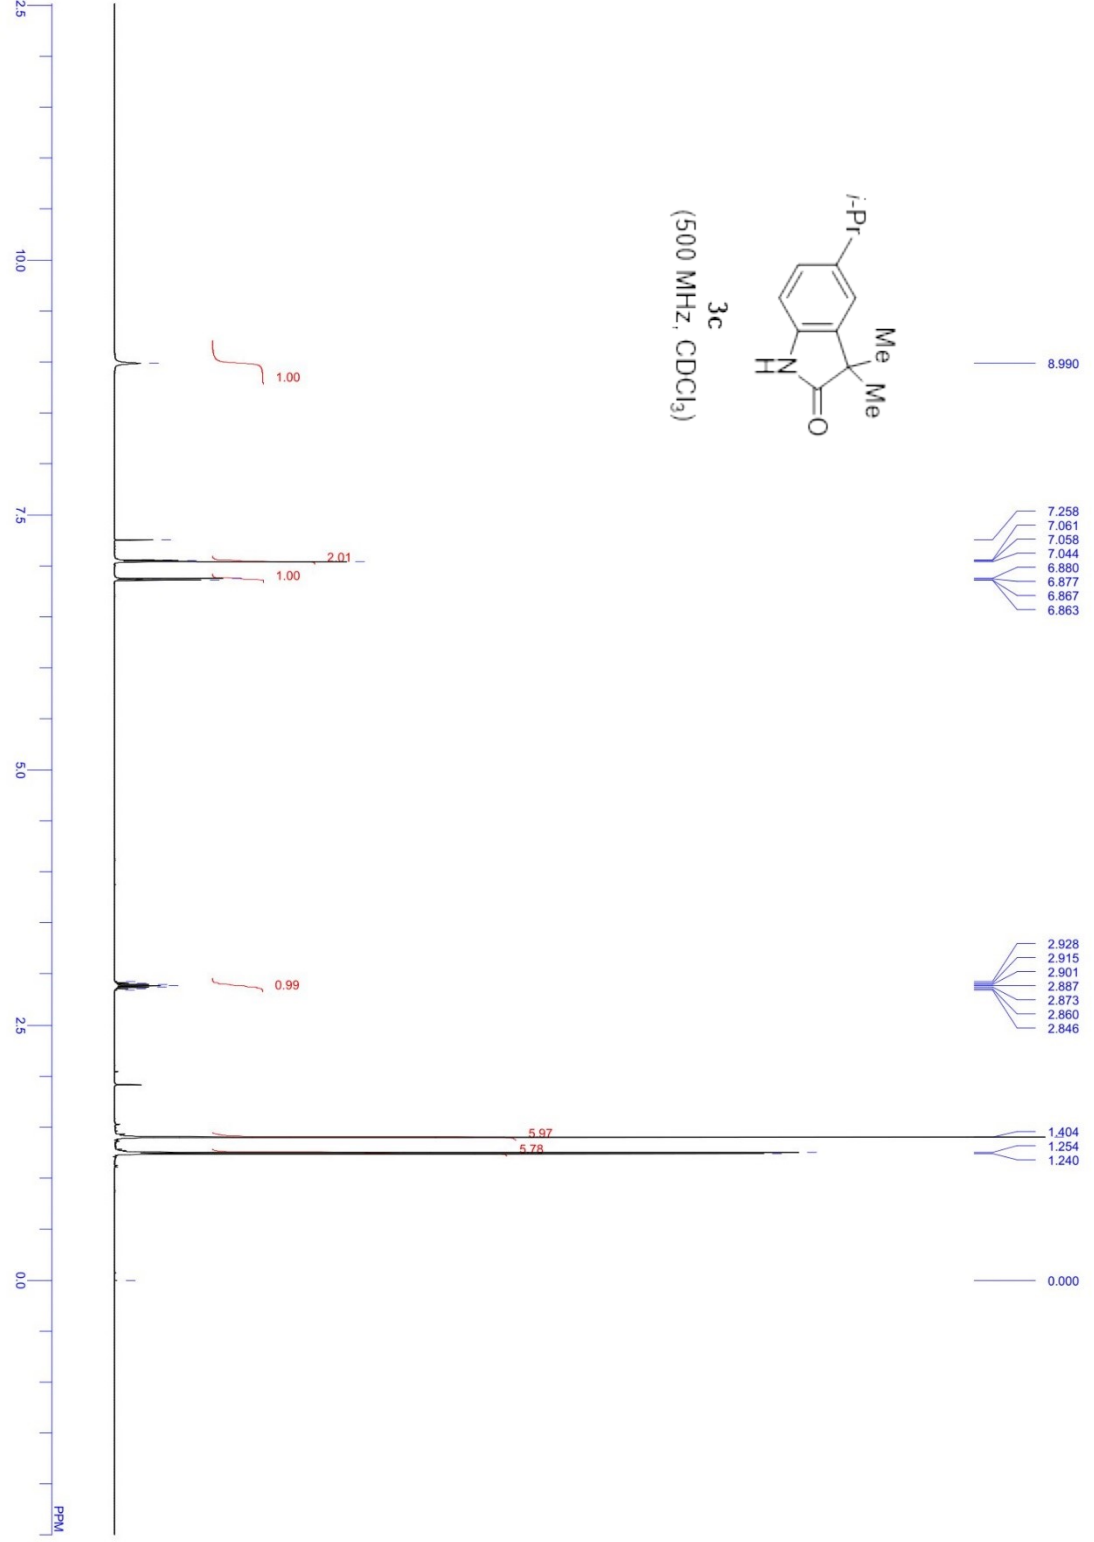

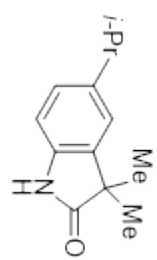

(125 MHz, CDCl<sub>3</sub>)

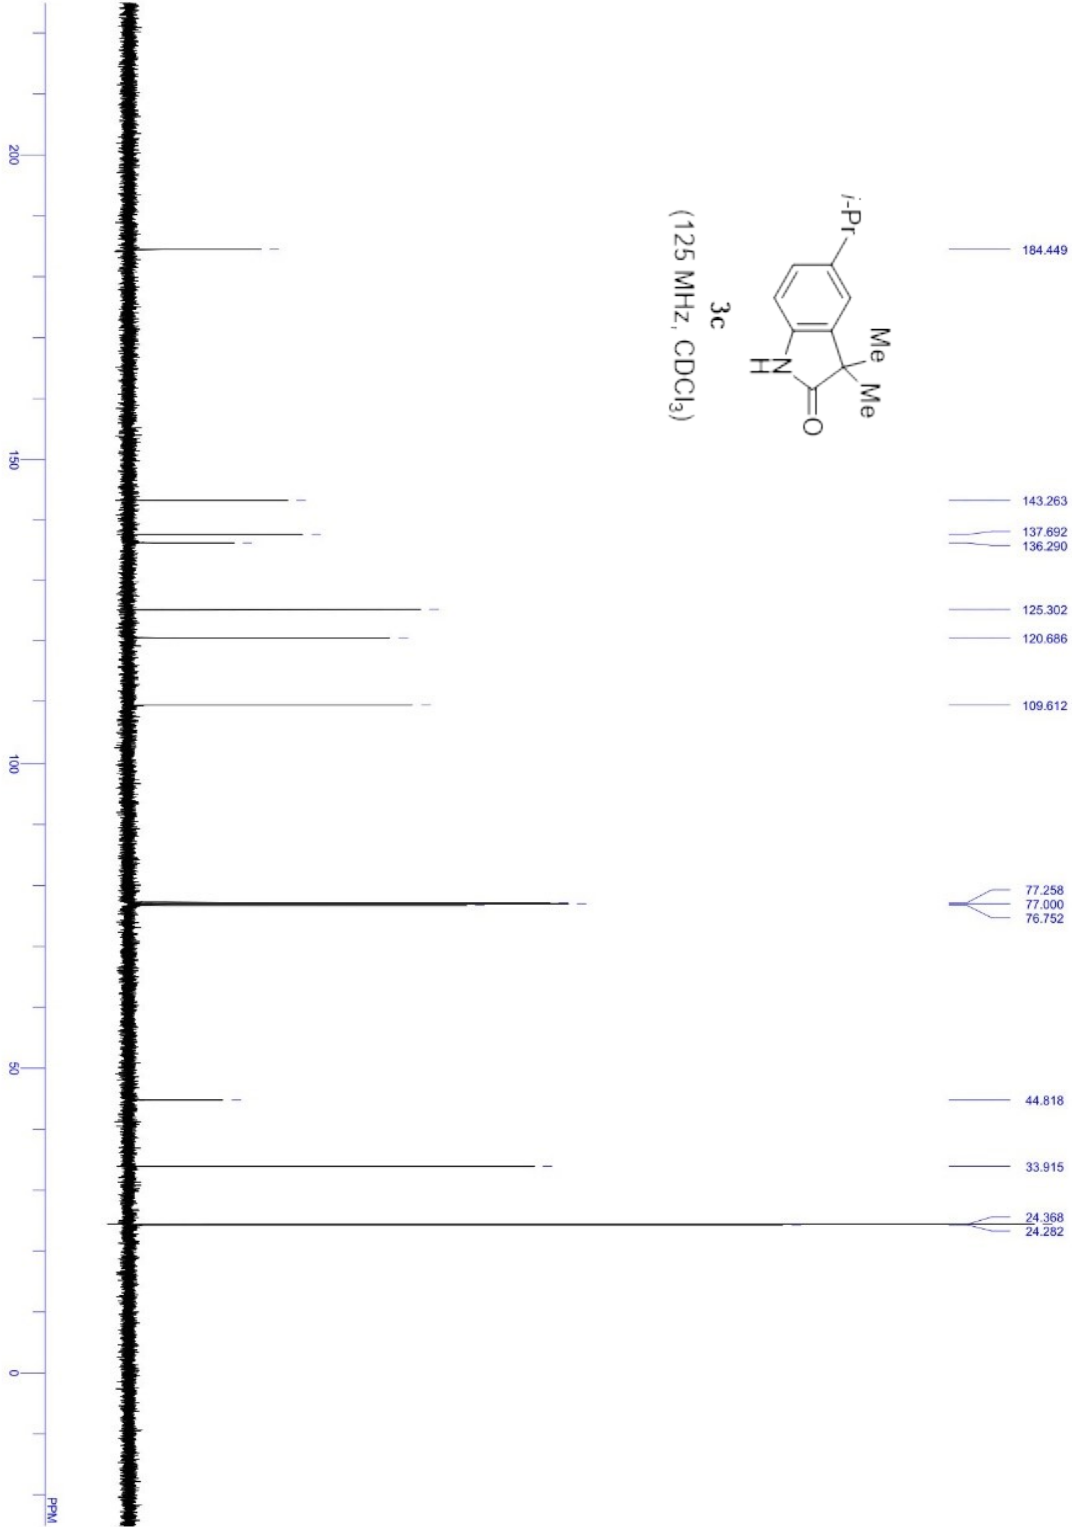

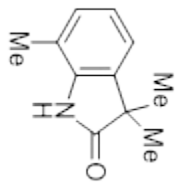

3d  
(500 MHz, CDCl<sub>3</sub>)

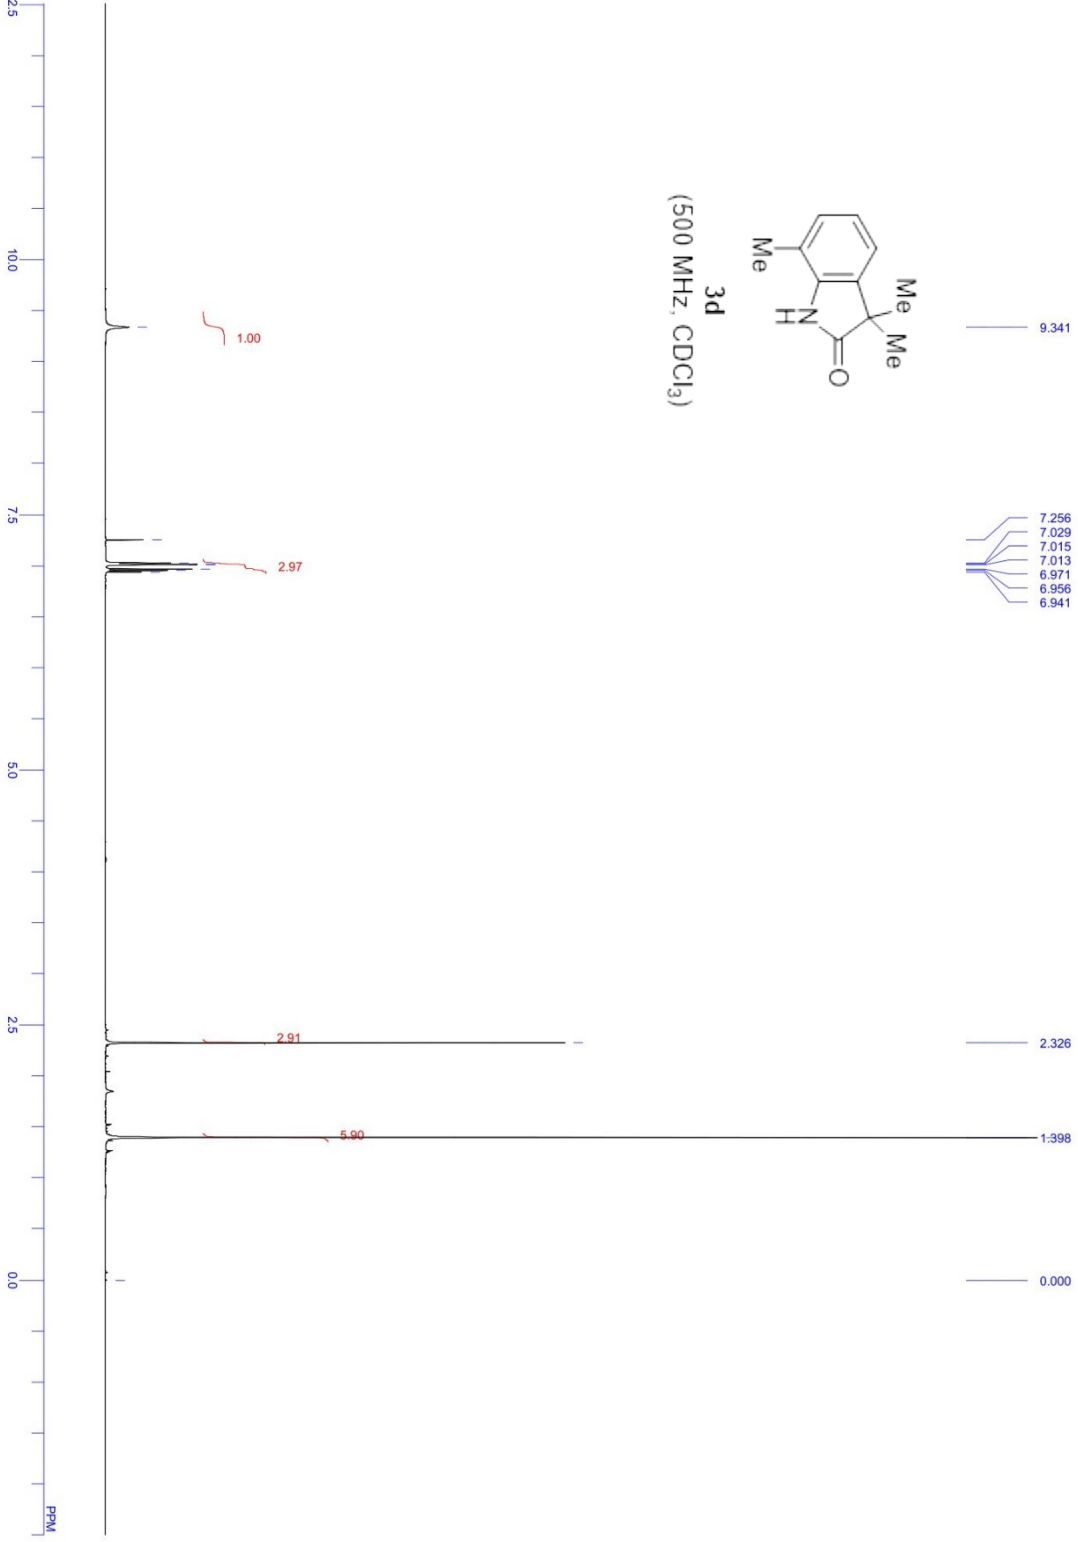

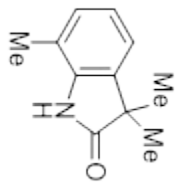

(125 MHz, CDCl<sub>3</sub>)

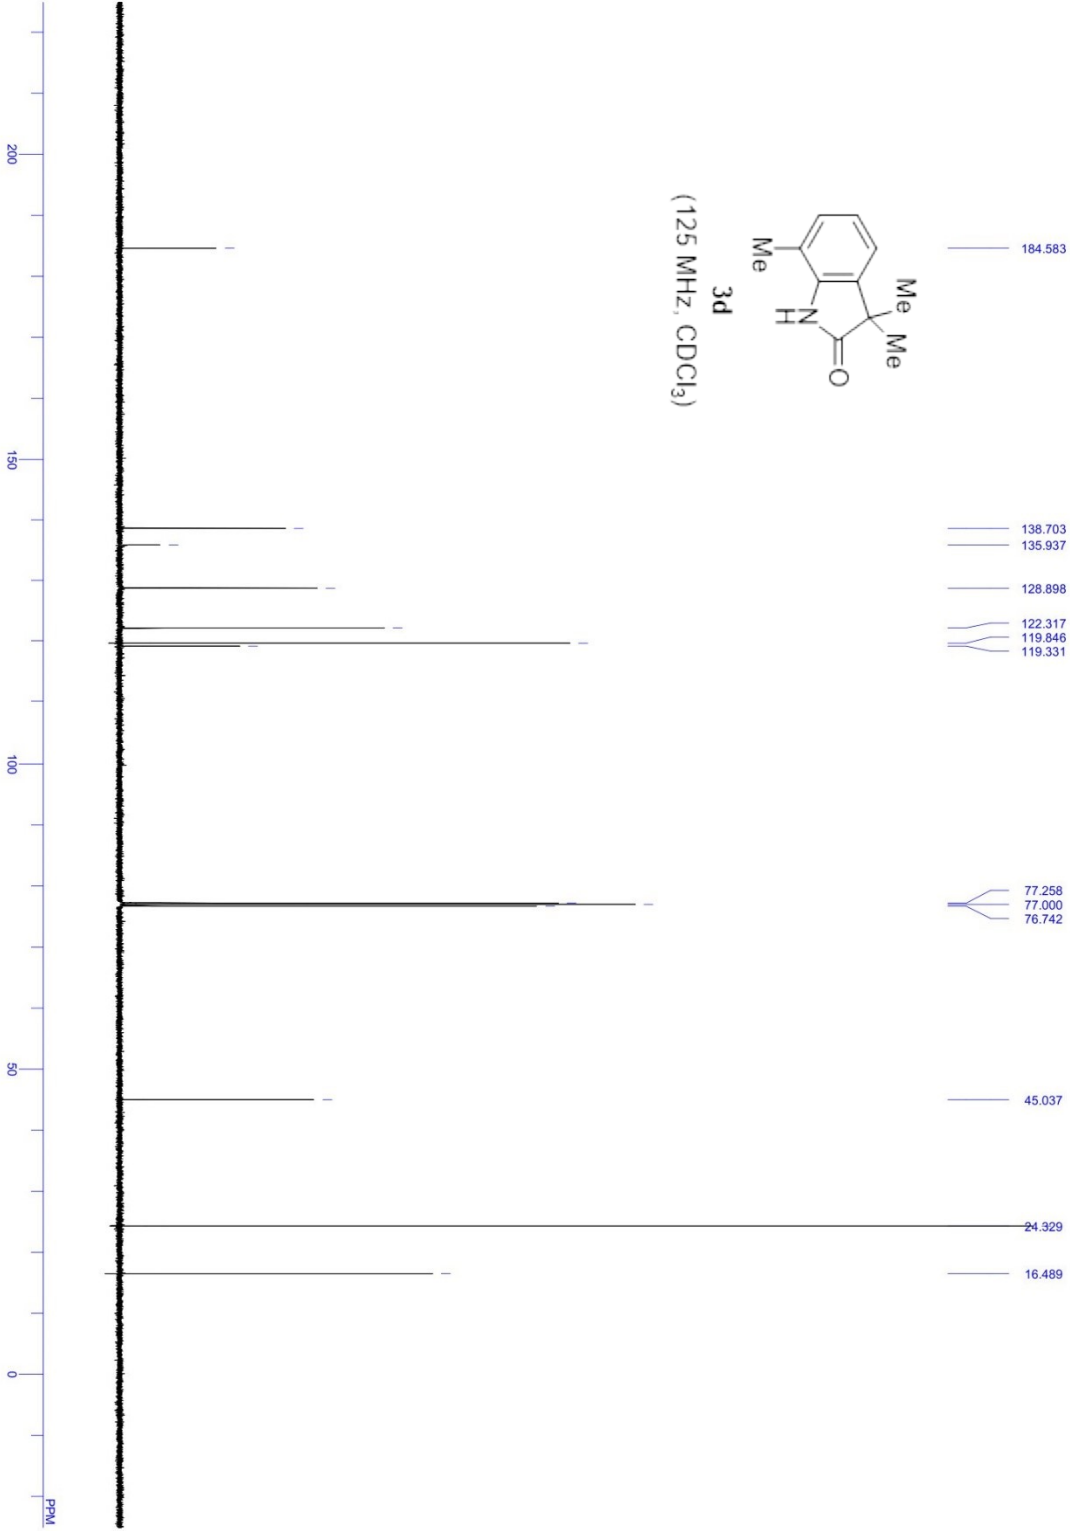

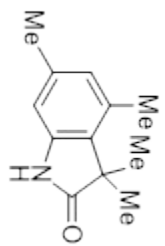

3e  
(500 MHz, CDCl<sub>3</sub>)

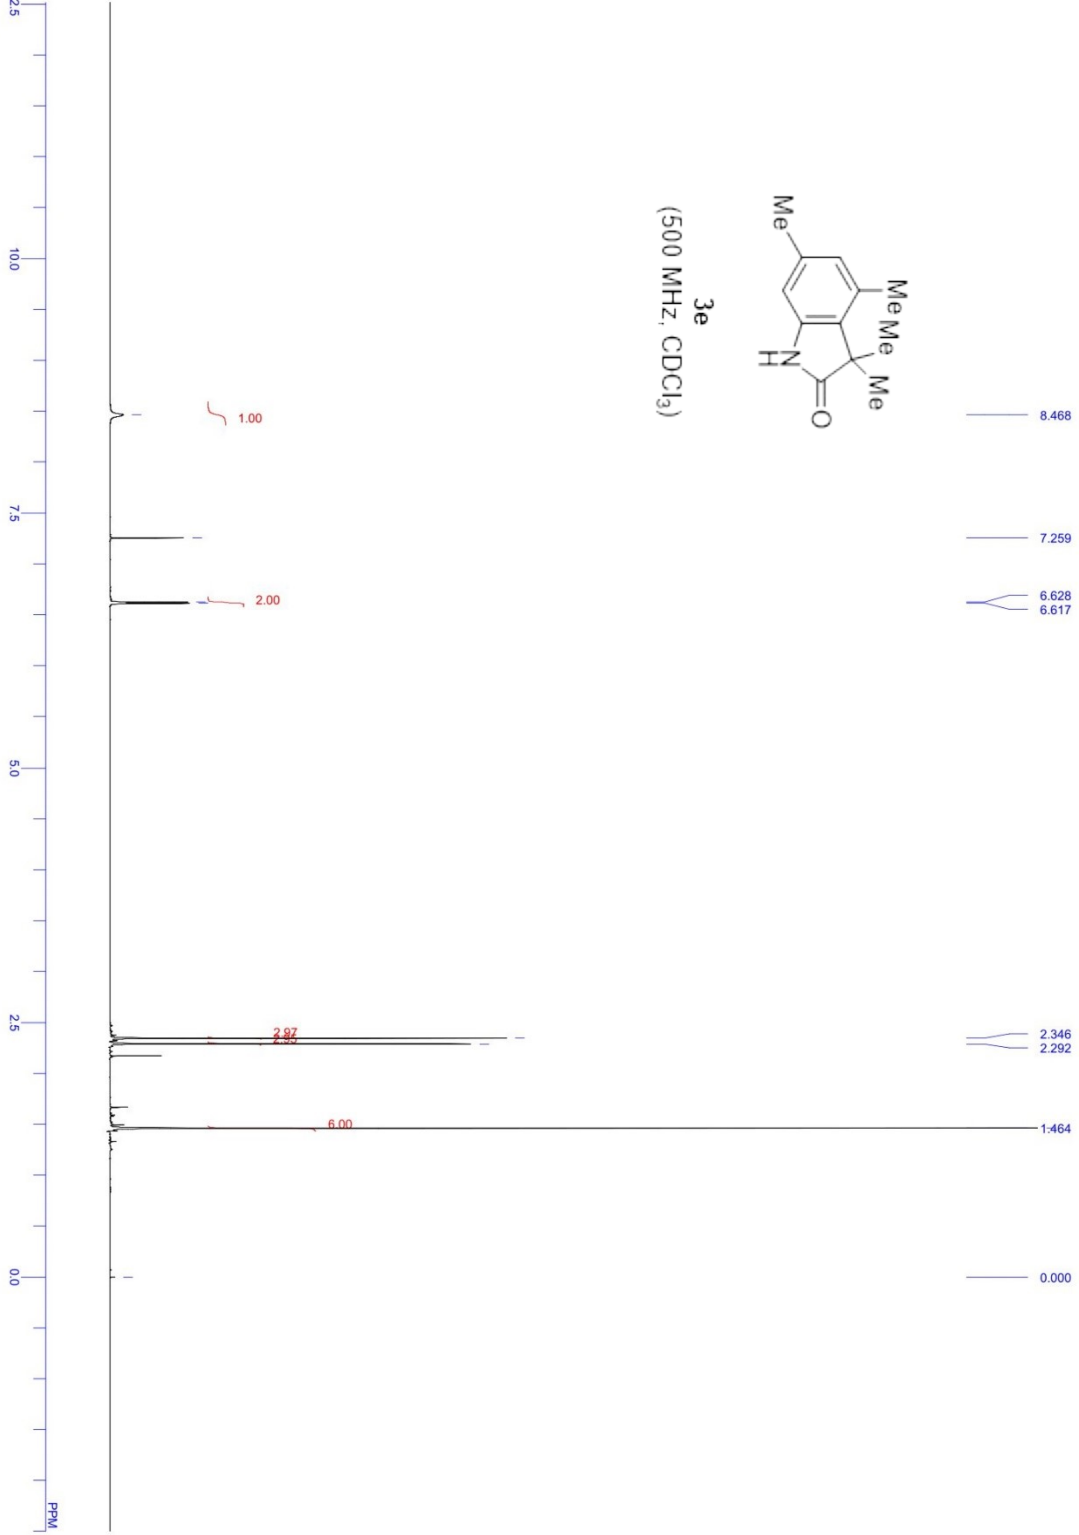

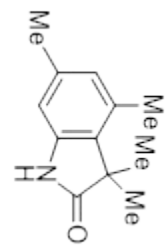

3e  
(125 MHz, CDCl<sub>3</sub>)

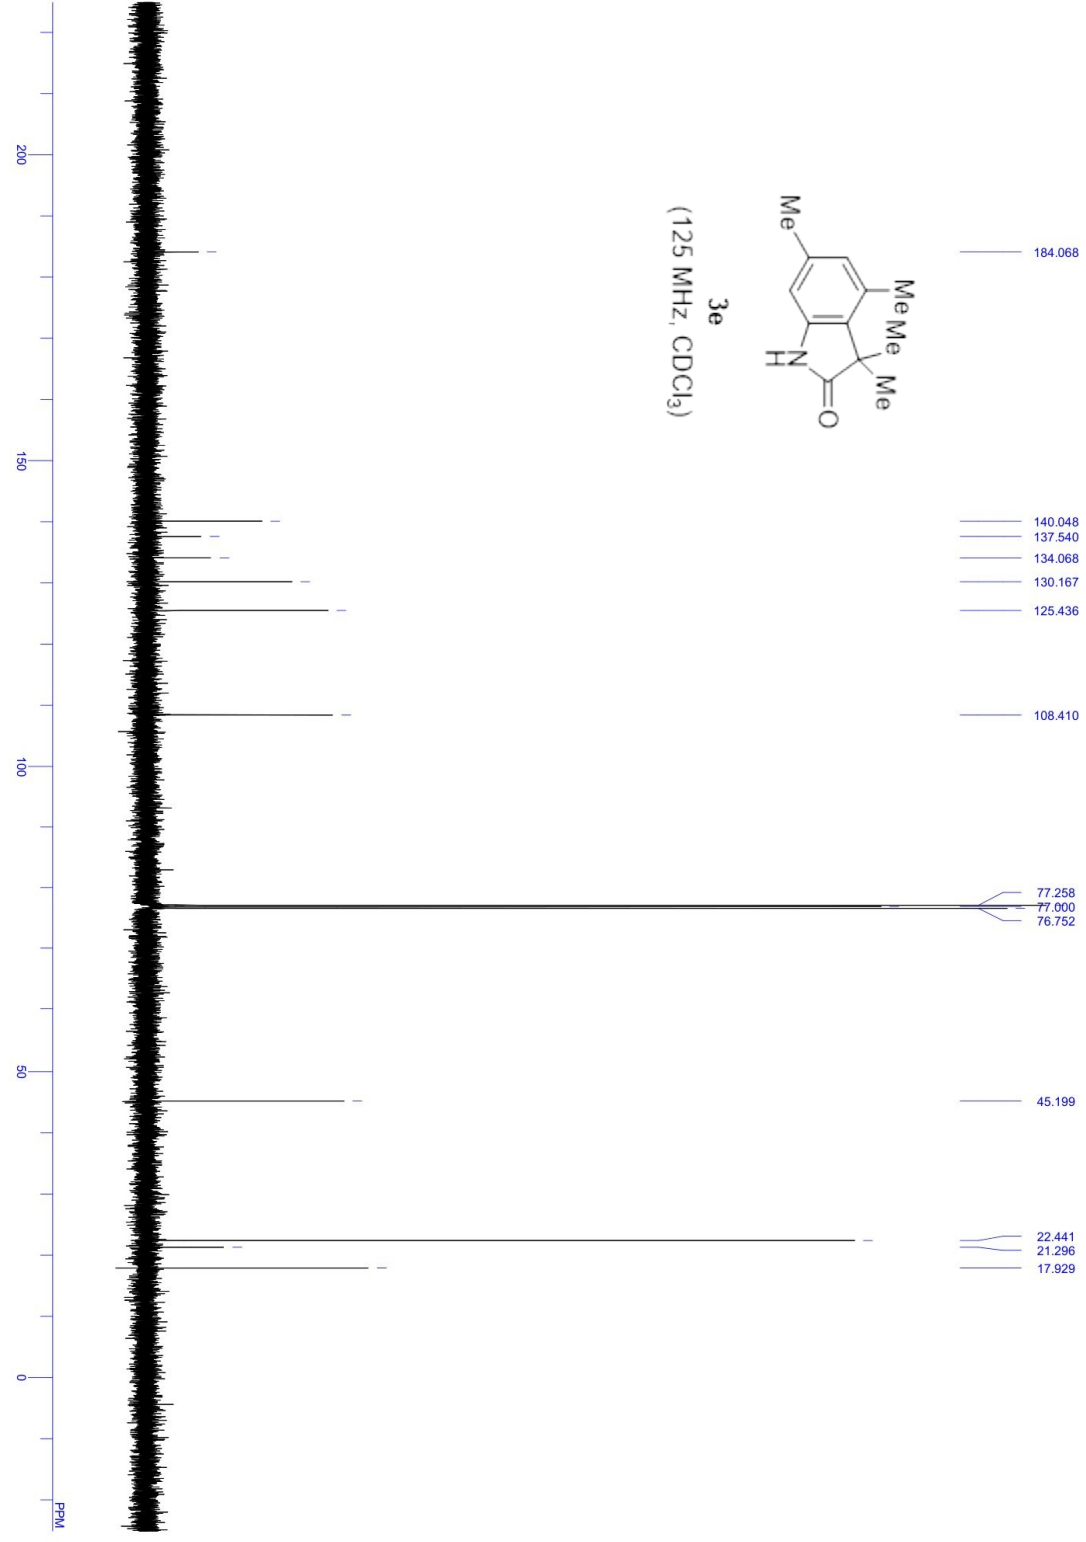

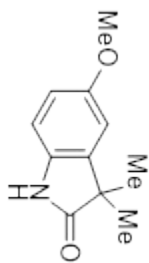

3f  
(500 MHz, CDCl<sub>3</sub>)

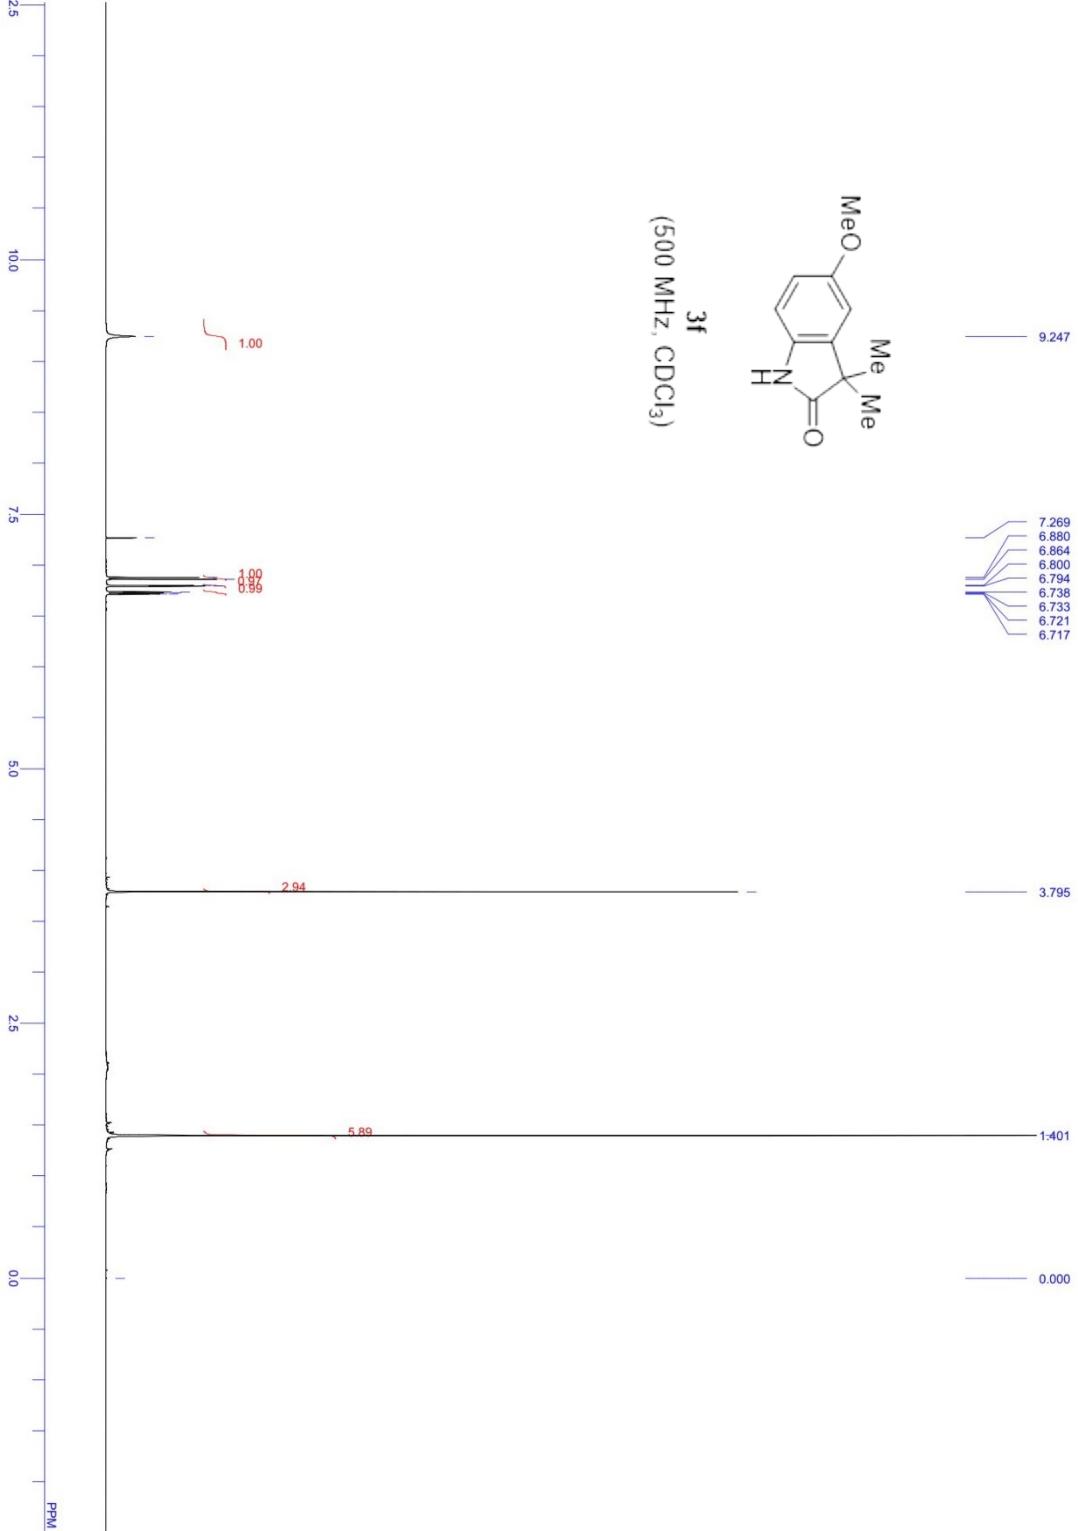

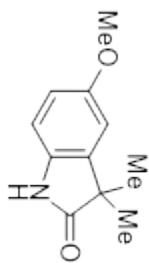

3f  
(125 MHz, CDCl<sub>3</sub>)

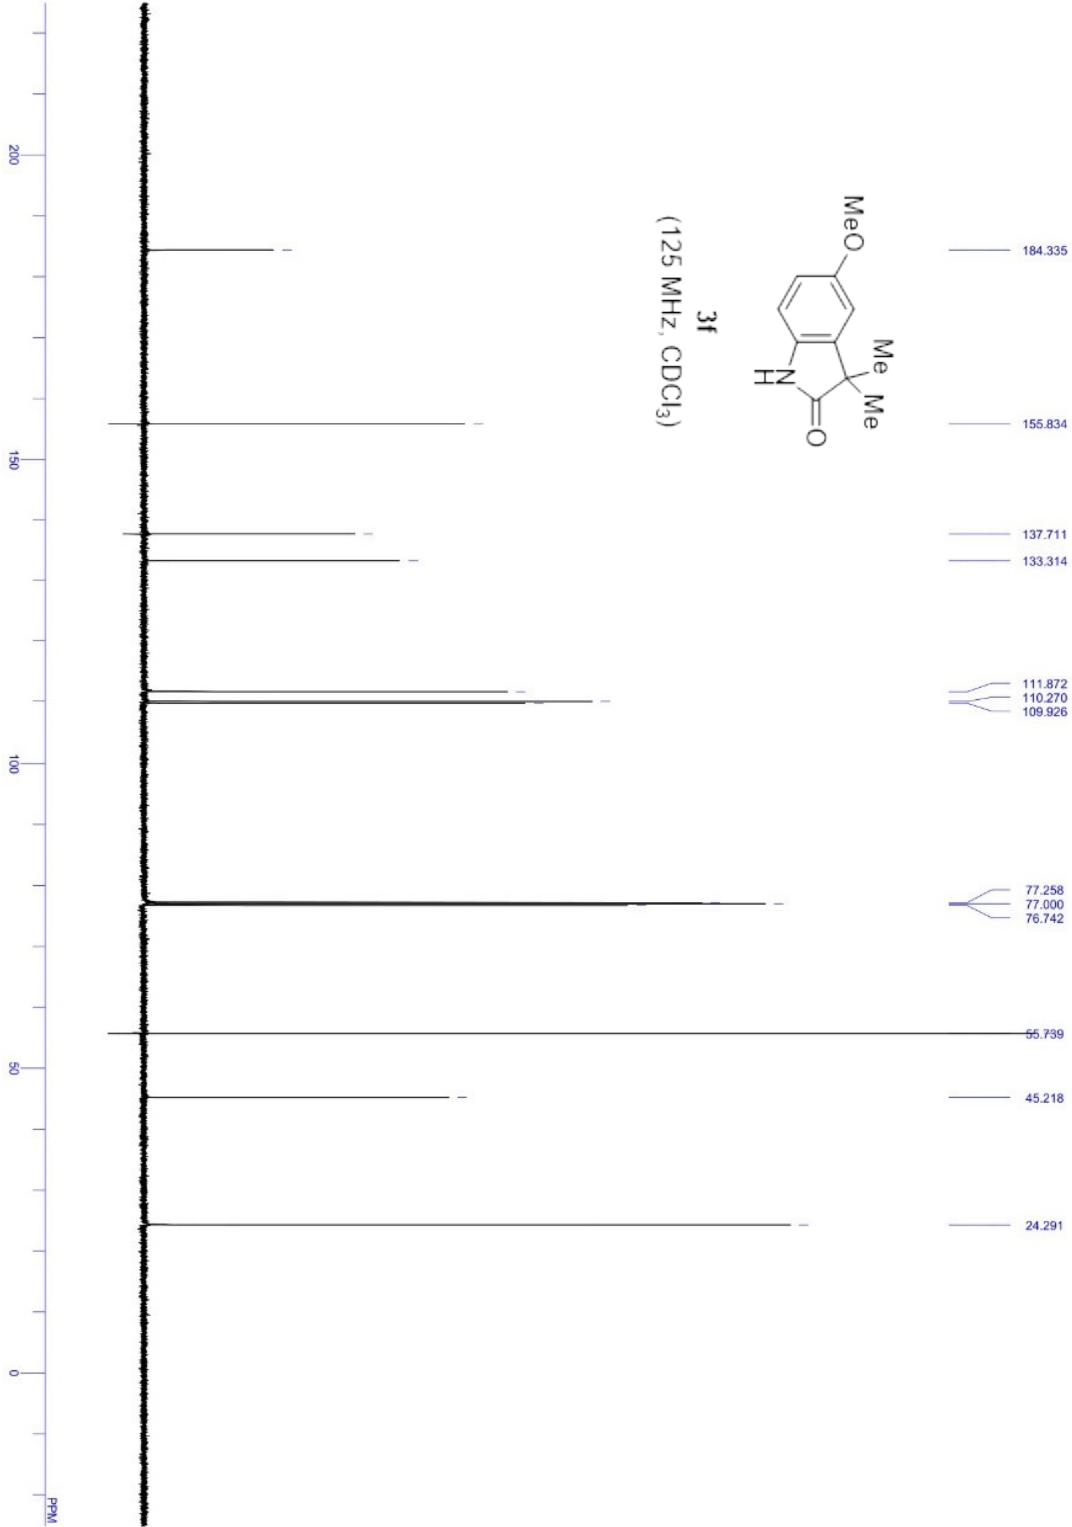



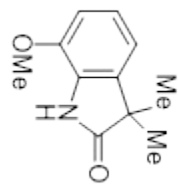

**3g**  
(500 MHz, CDCl<sub>3</sub>)

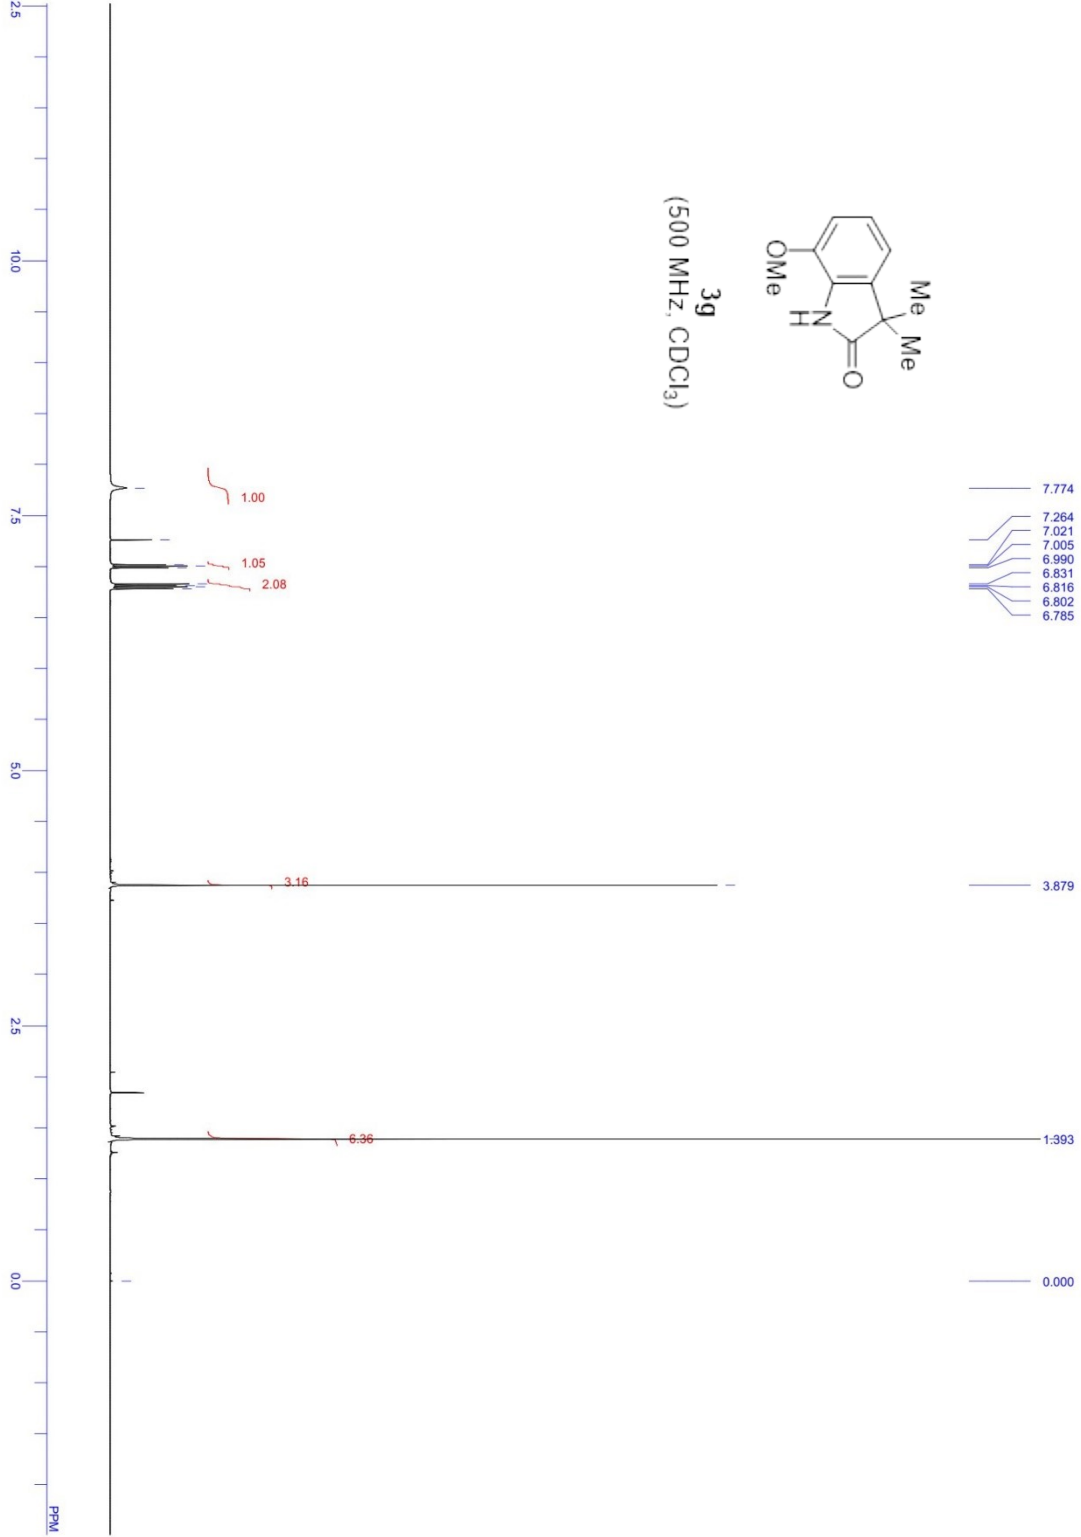

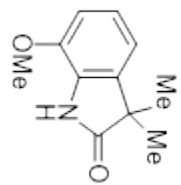

**3g**  
(125 MHz, CDCl<sub>3</sub>)

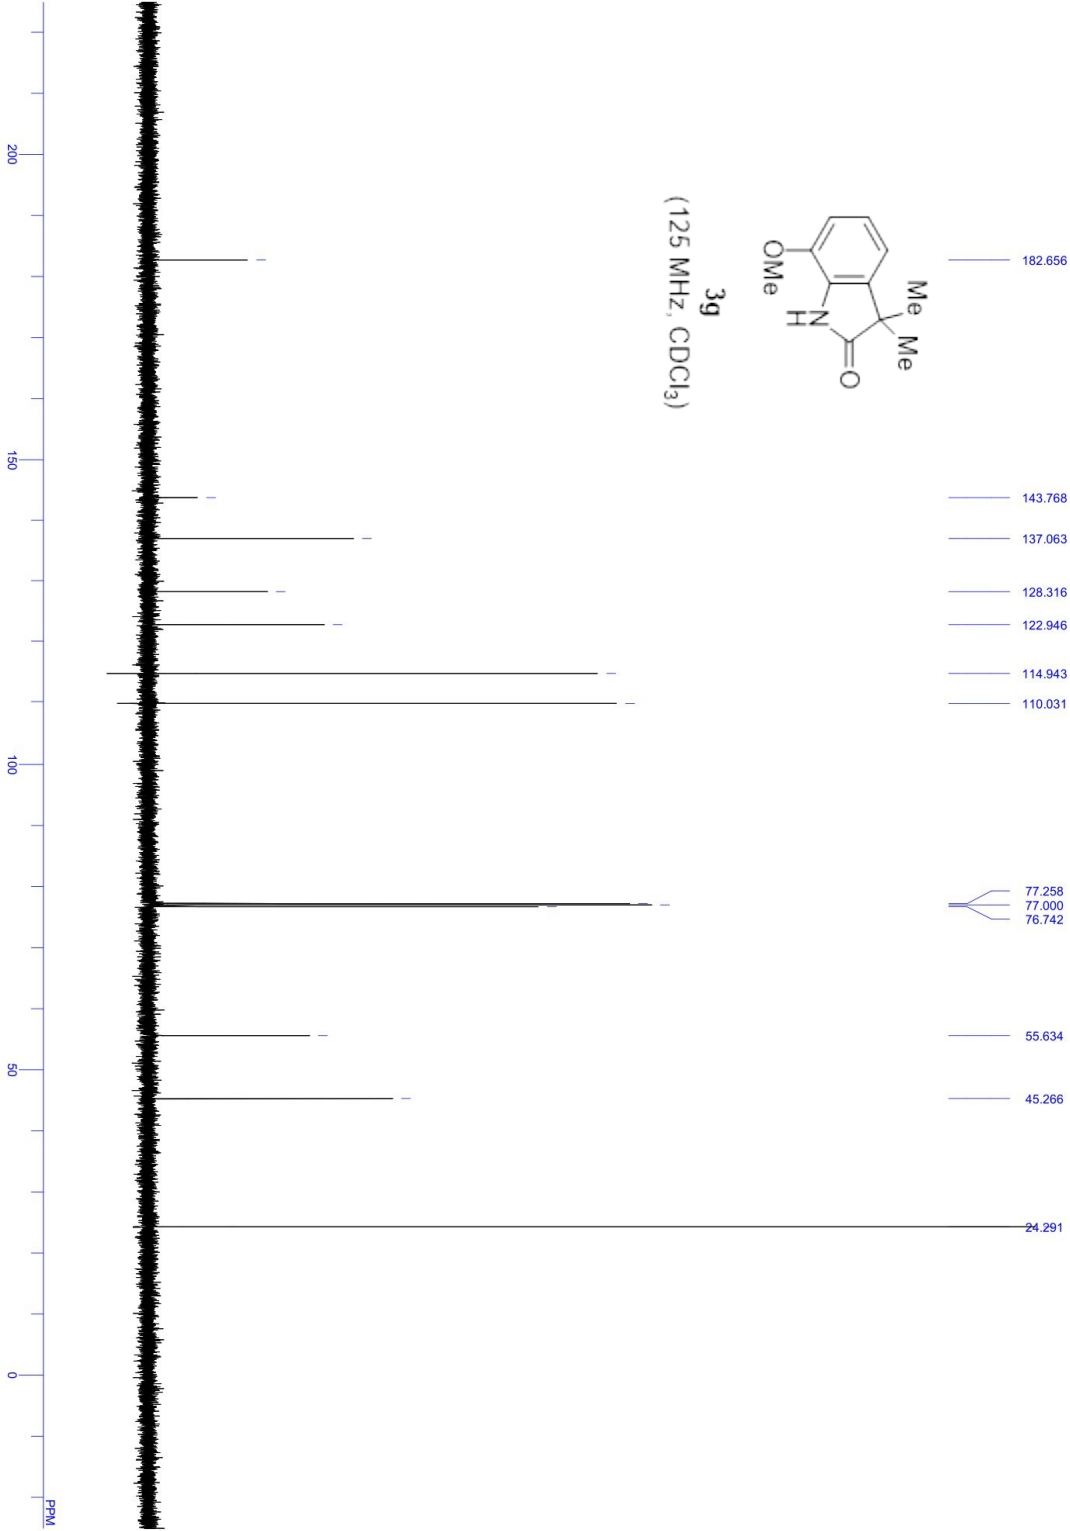

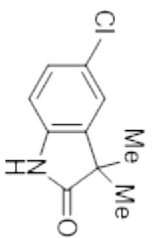

3h  
(500 MHz, CDCl<sub>3</sub>)

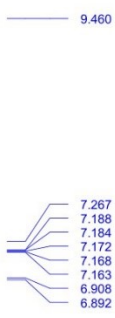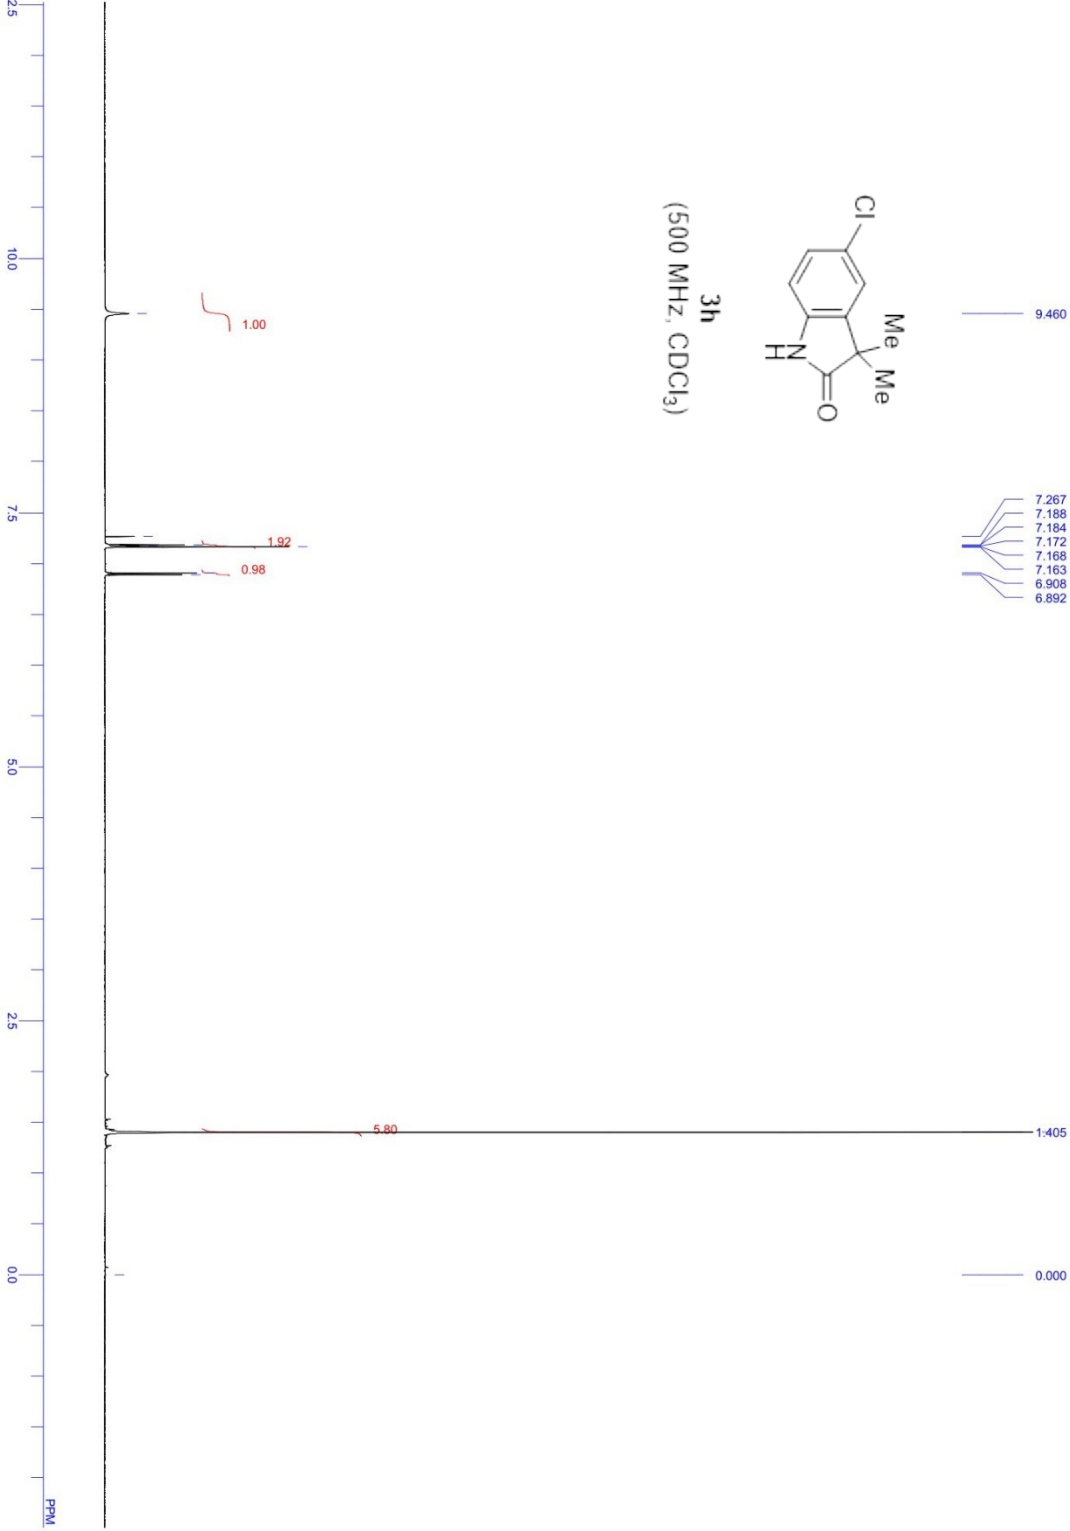

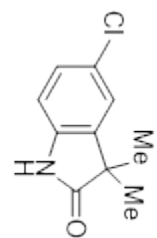

3h  
(125 MHz, CDCl<sub>3</sub>)

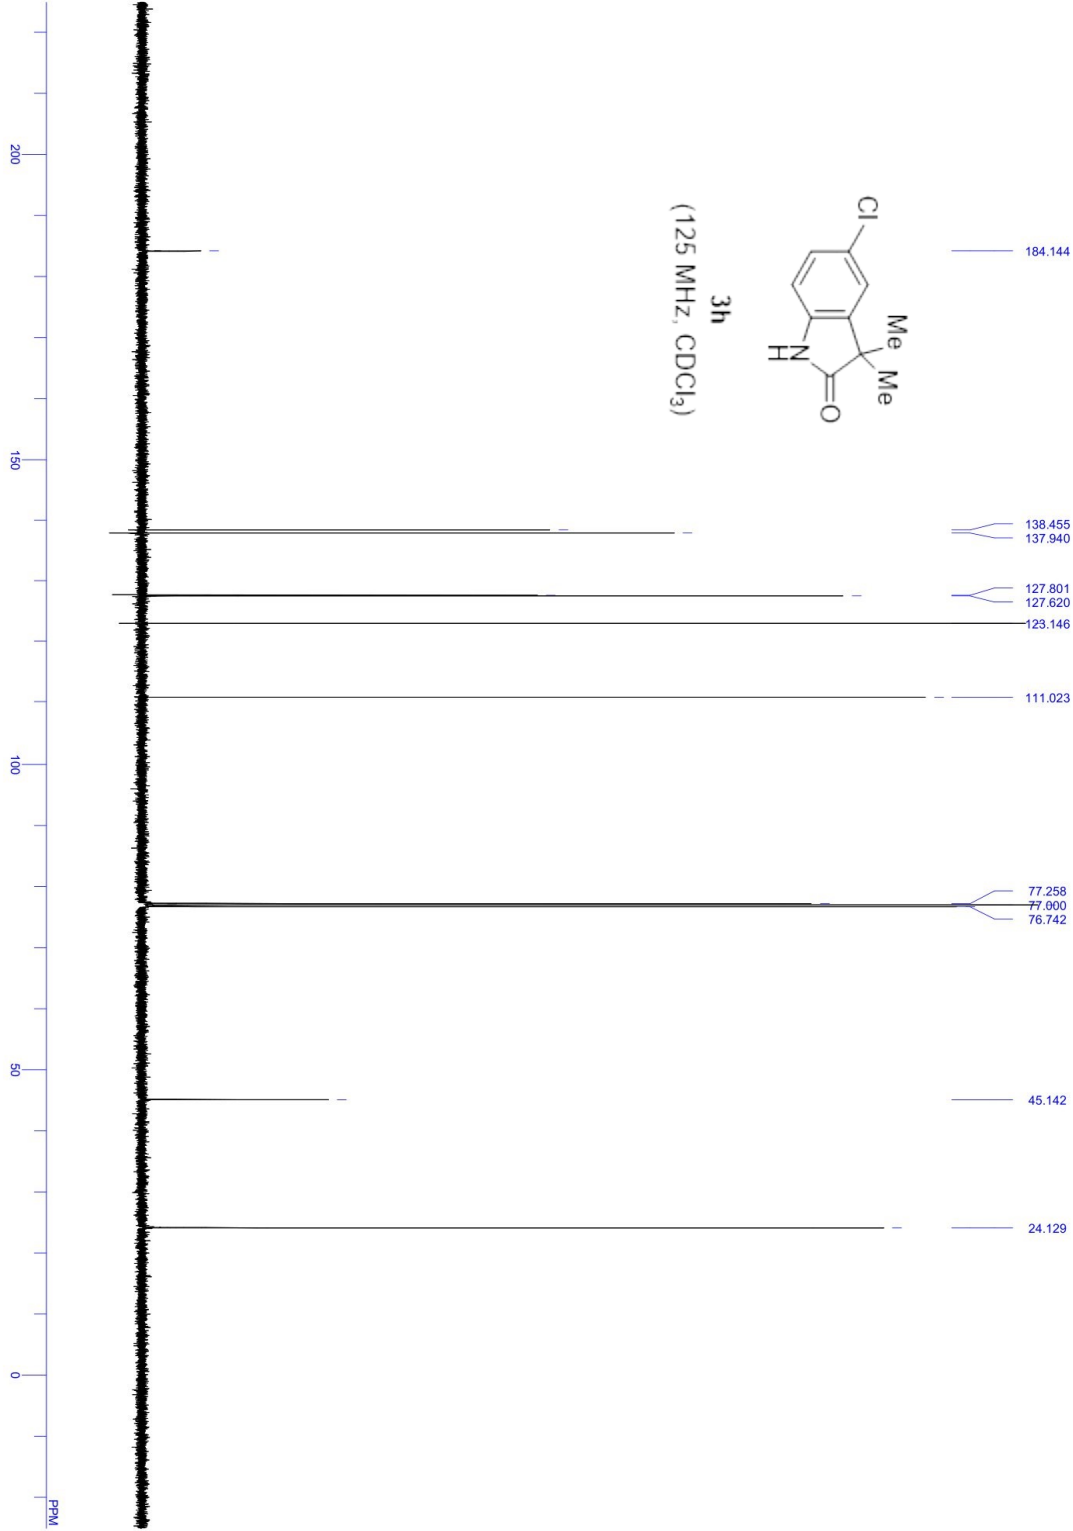

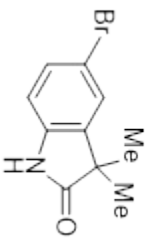

3i  
(500 MHz, CDCl<sub>3</sub>)

- 9.426
- 7.336
- 7.333
- 7.320
- 7.315
- 7.304
- 7.299
- 7.266
- 6.864
- 6.848
- 0.000

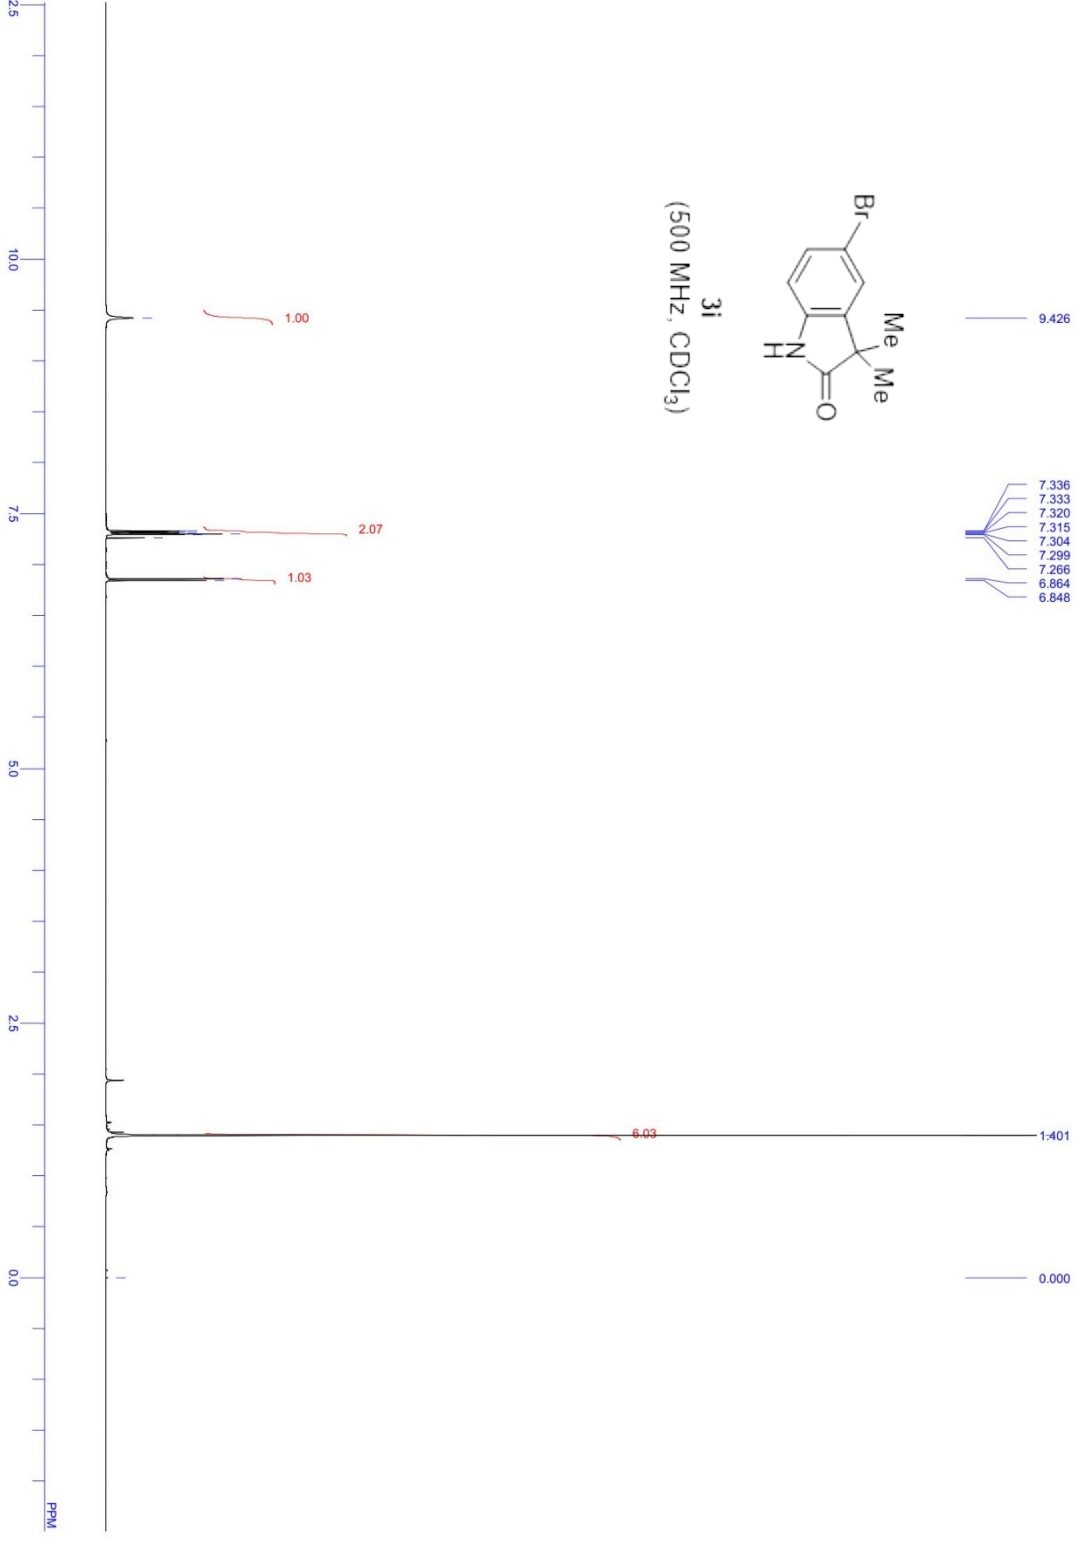

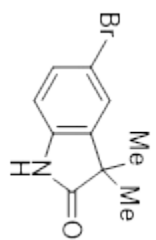

31

(125 MHz, CDCl<sub>3</sub>)

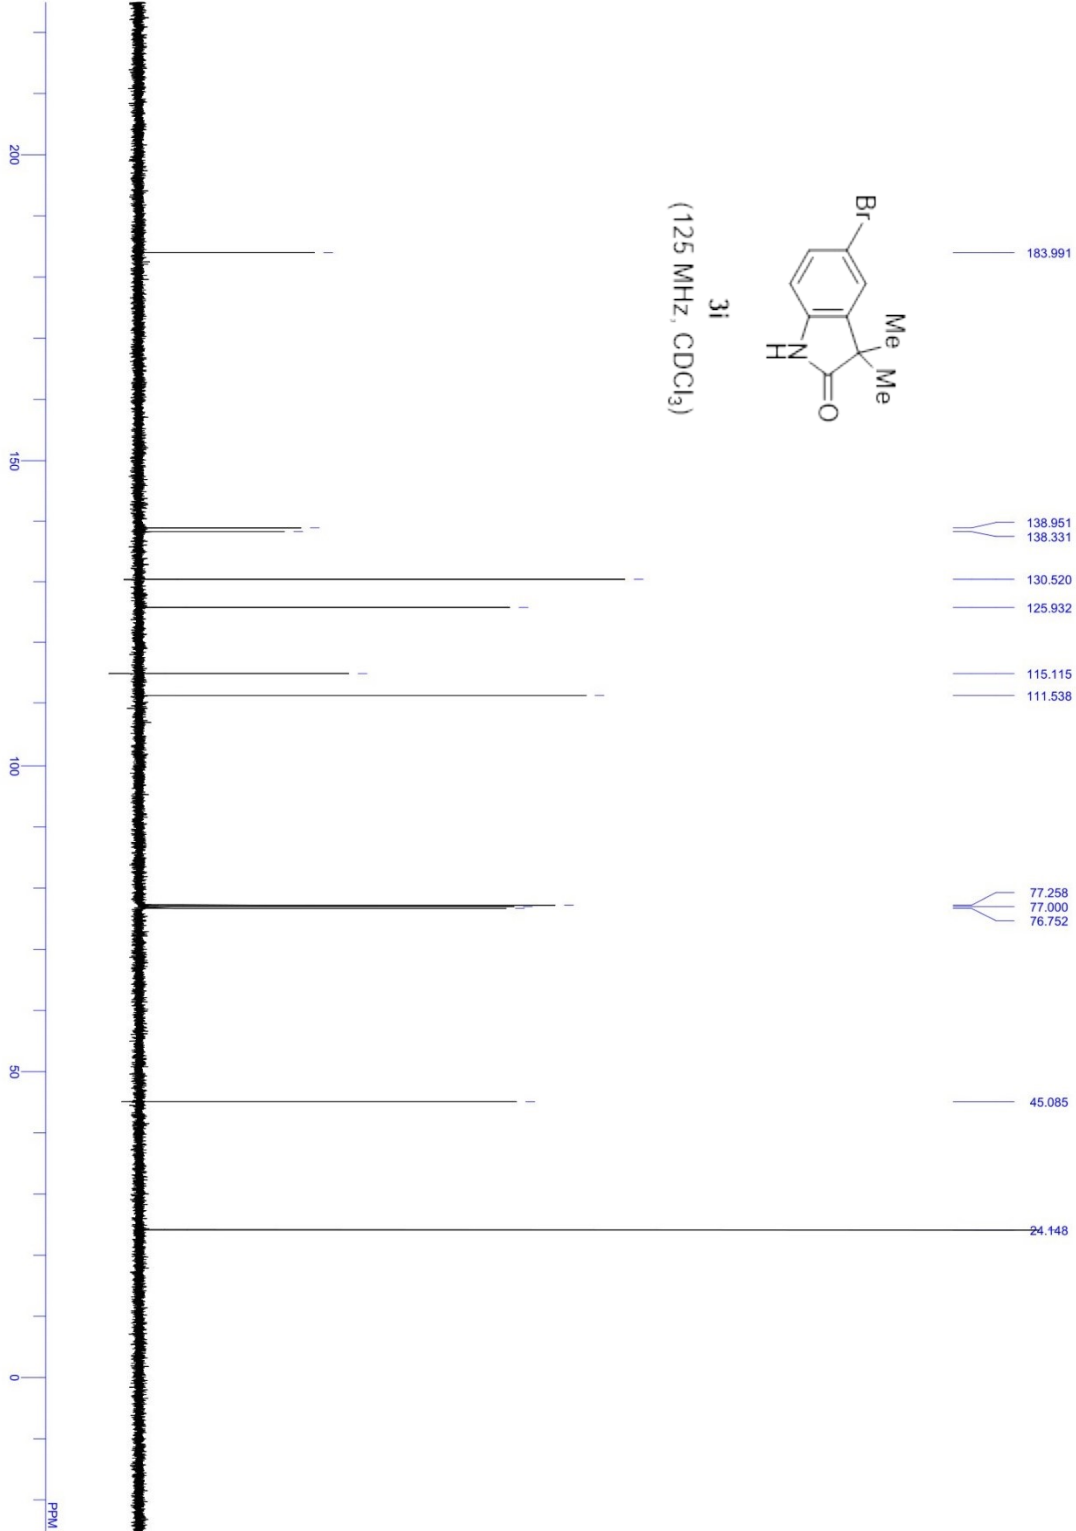

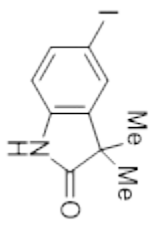

3j  
(500 MHz, CDCl<sub>3</sub>)

9.458

7.526  
7.523  
7.510  
7.476  
7.472  
7.267  
6.773  
6.755

1.393

0.000

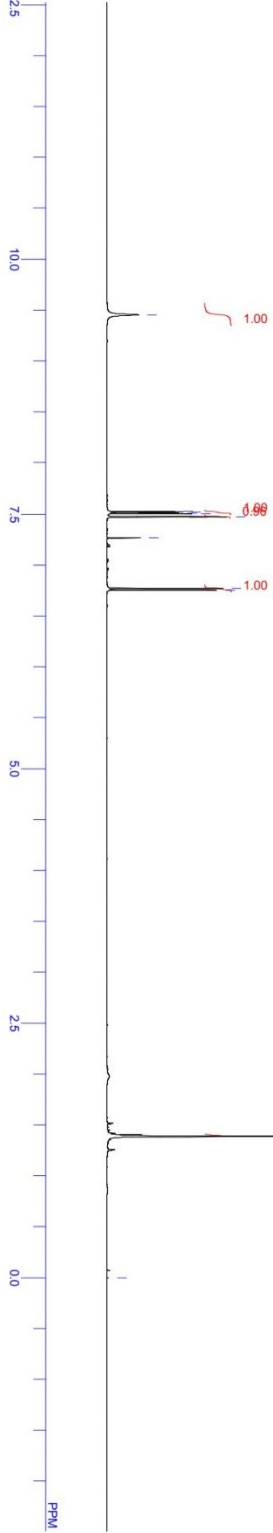

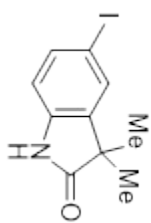

3j  
(125 MHz, CDCl<sub>3</sub>)

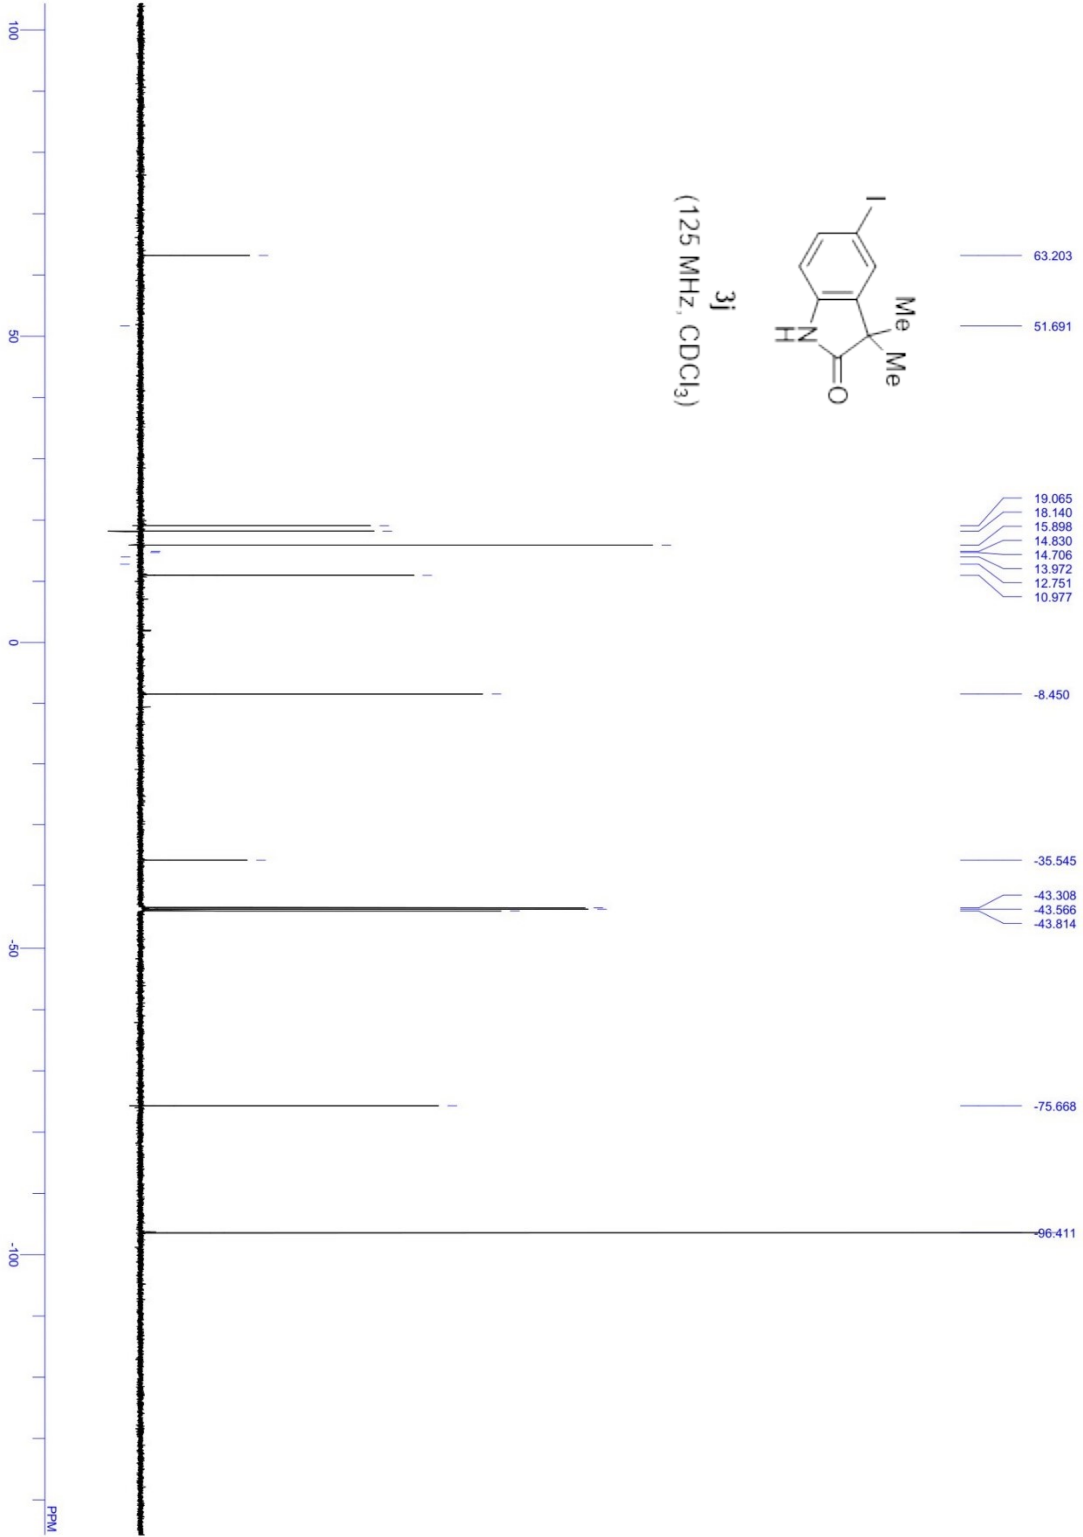



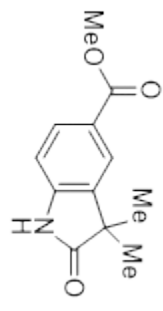

3k  
(500 MHz, DMSO-D<sub>6</sub>)

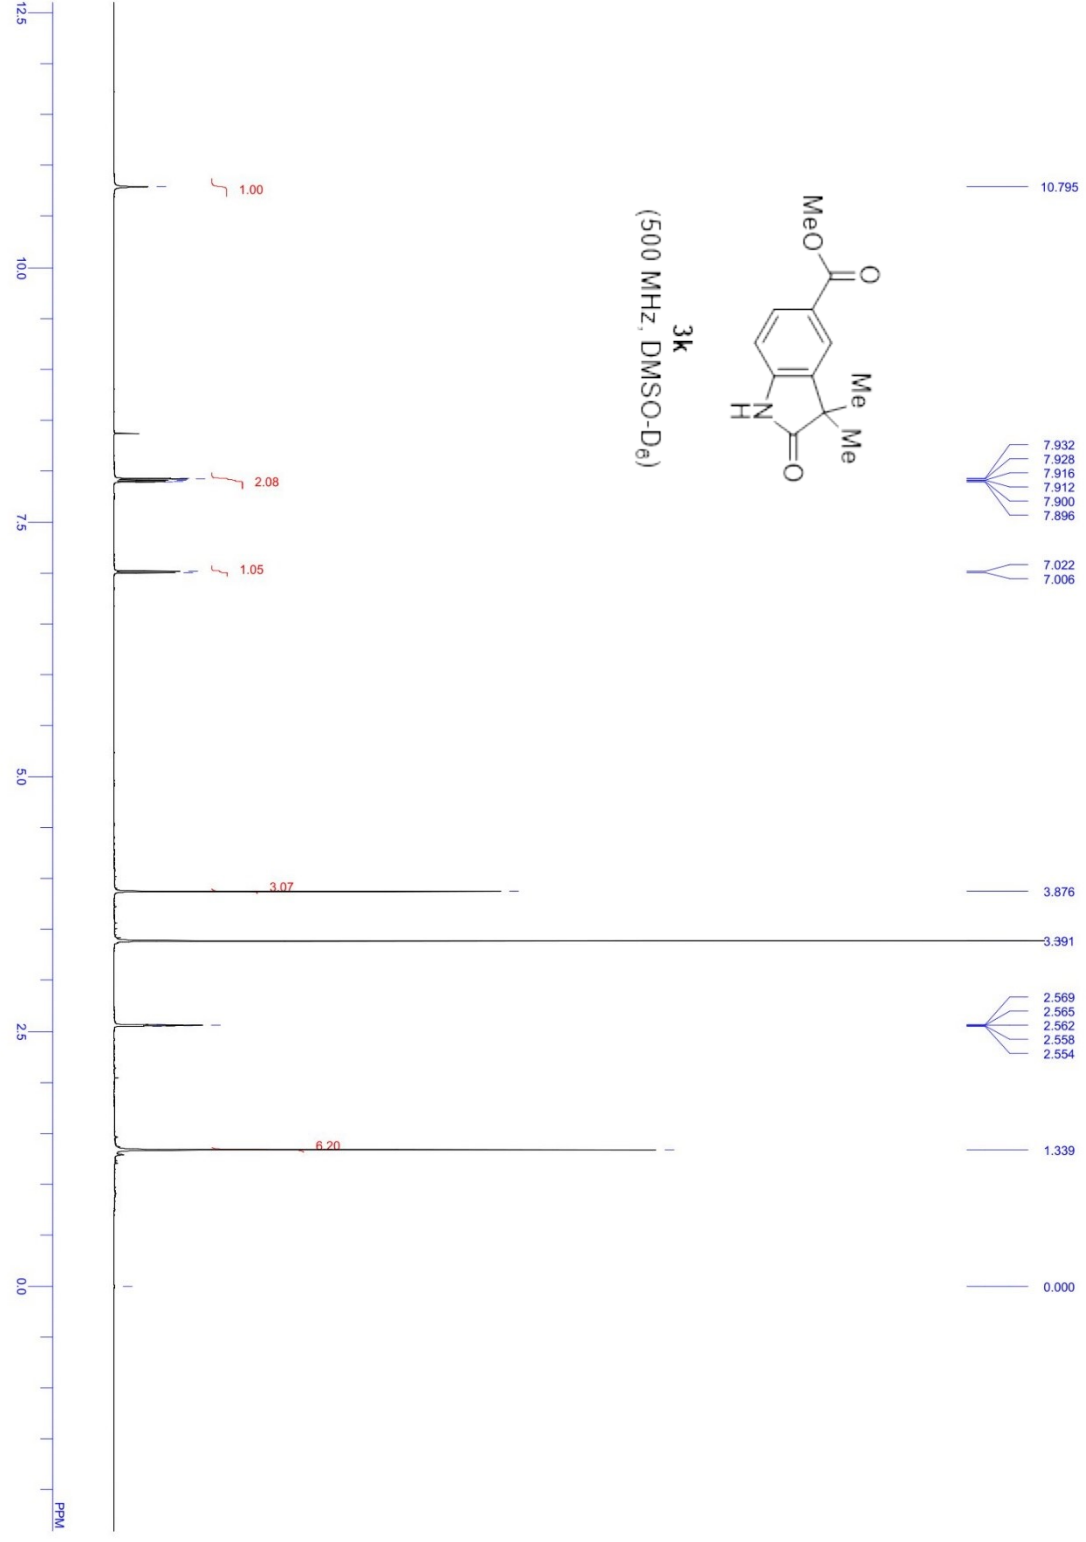

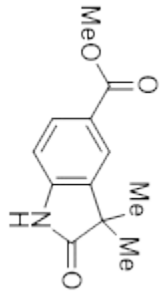

3k  
(125 MHz, DMSO-d<sub>6</sub>)

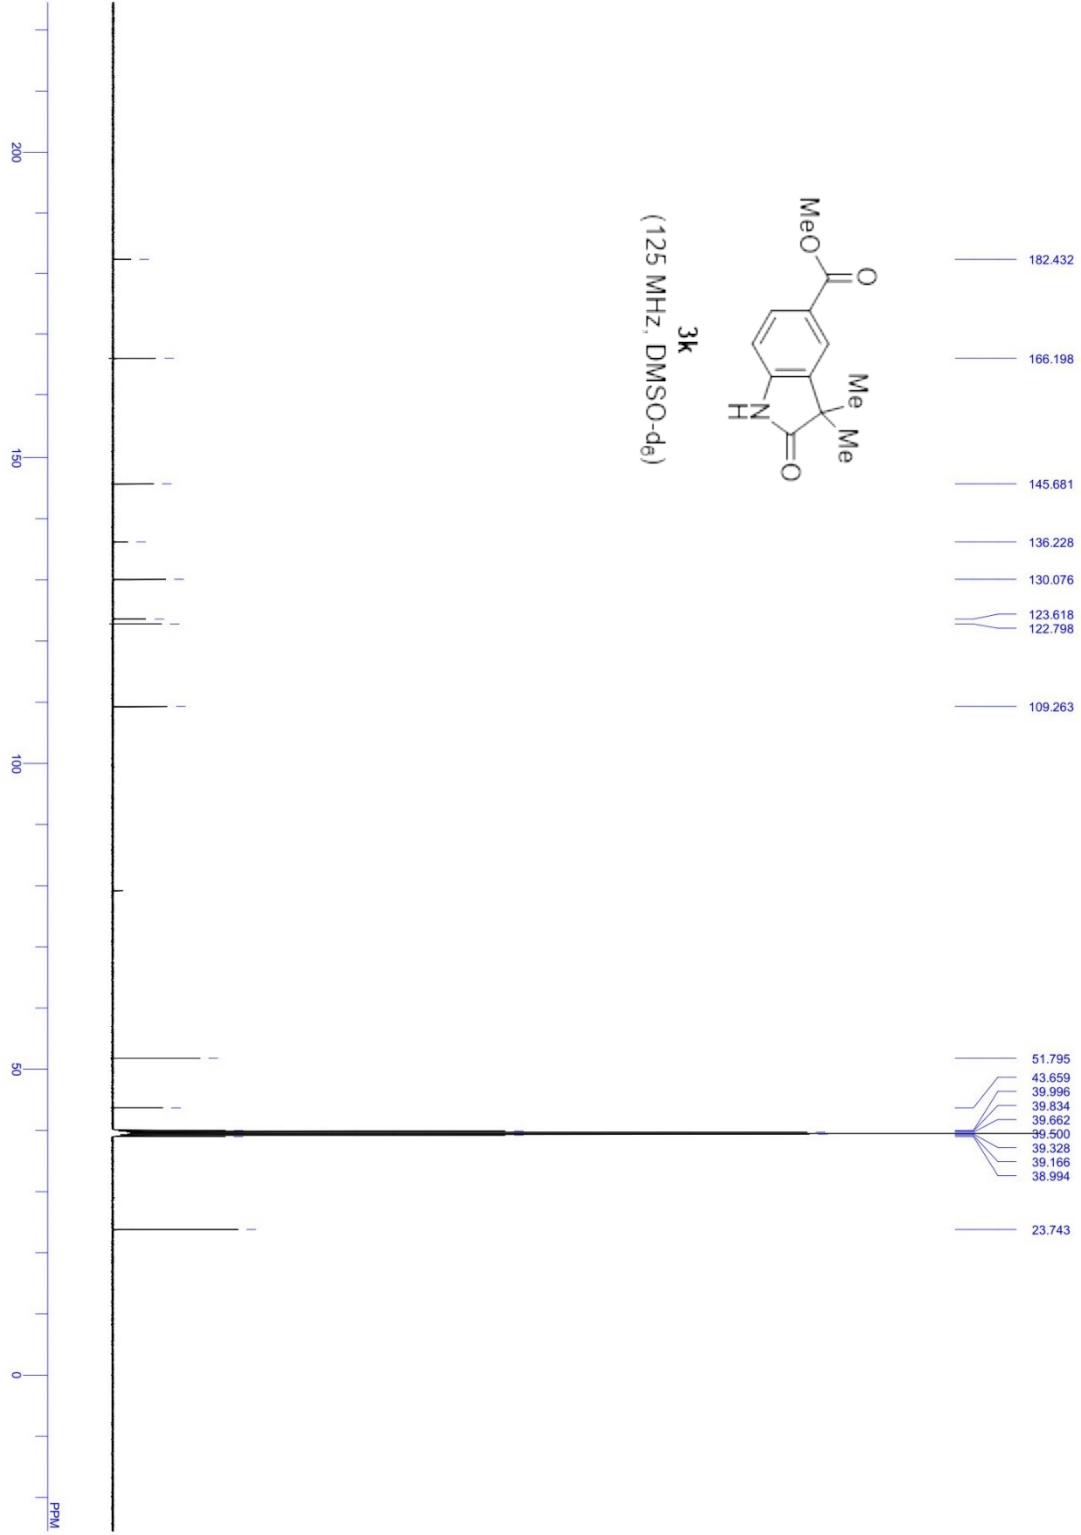

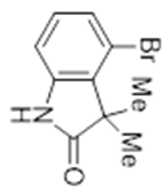

3l-major  
(500 MHz, CDCl<sub>3</sub>)

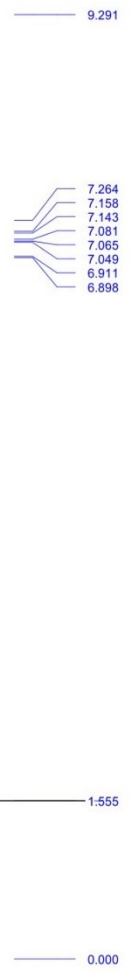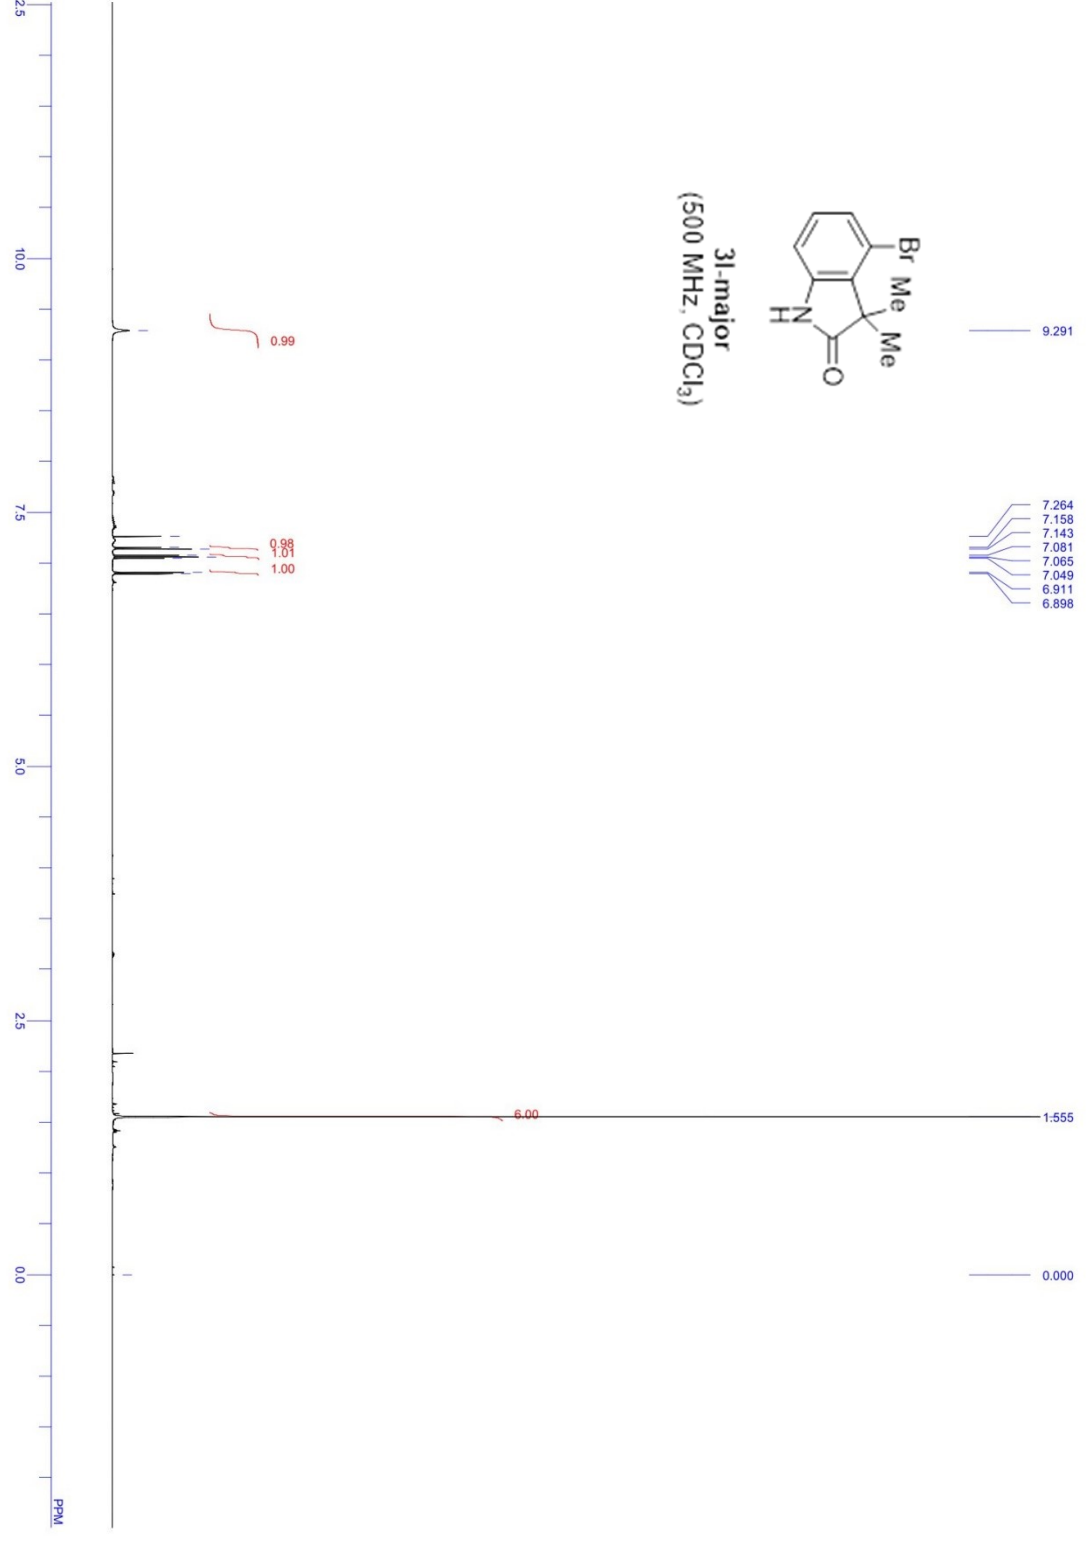

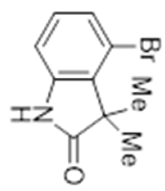

3l-major  
(125 MHz, CDCl<sub>3</sub>)

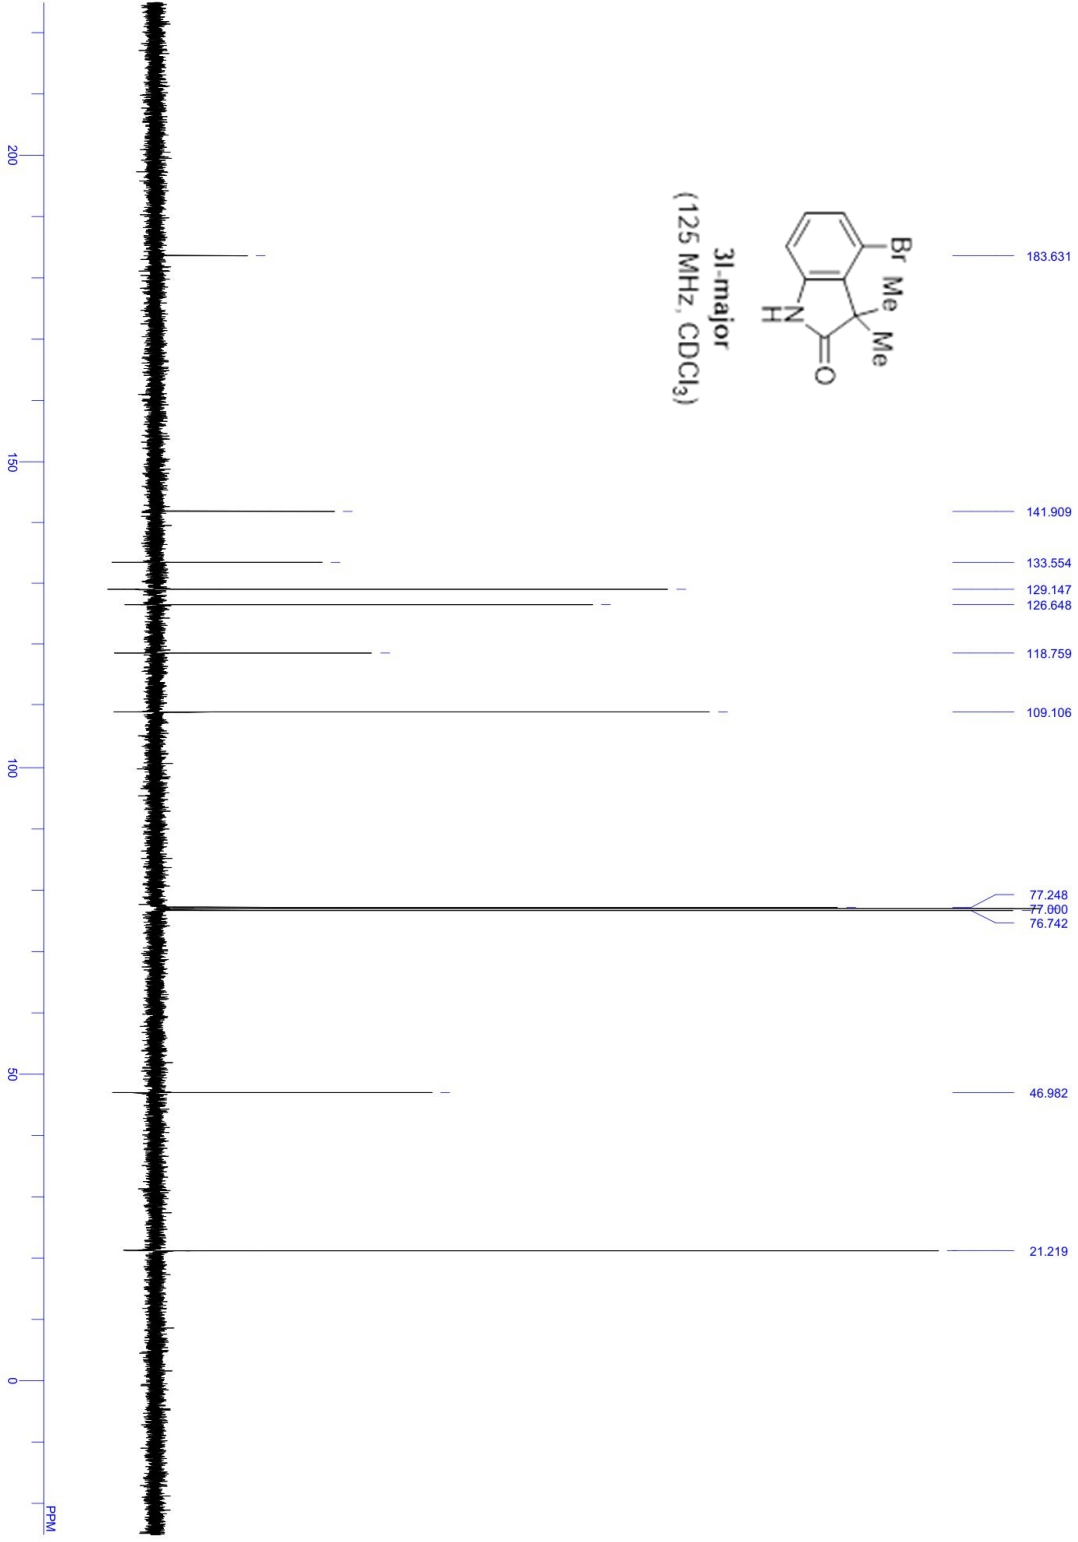

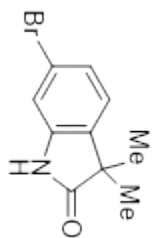

31-minor  
(500 MHz, CDCl<sub>3</sub>)

8.767

7.264  
7.188  
7.185  
7.172  
7.169  
7.119  
7.115  
7.059  
7.044

1.390

0.000

2.5  
10.0  
7.5  
5.0  
2.5  
0.0  
PPM

0.95

0.86  
0.99

6.00

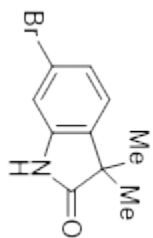

3-brominor  
(125 MHz, CDCl<sub>3</sub>)

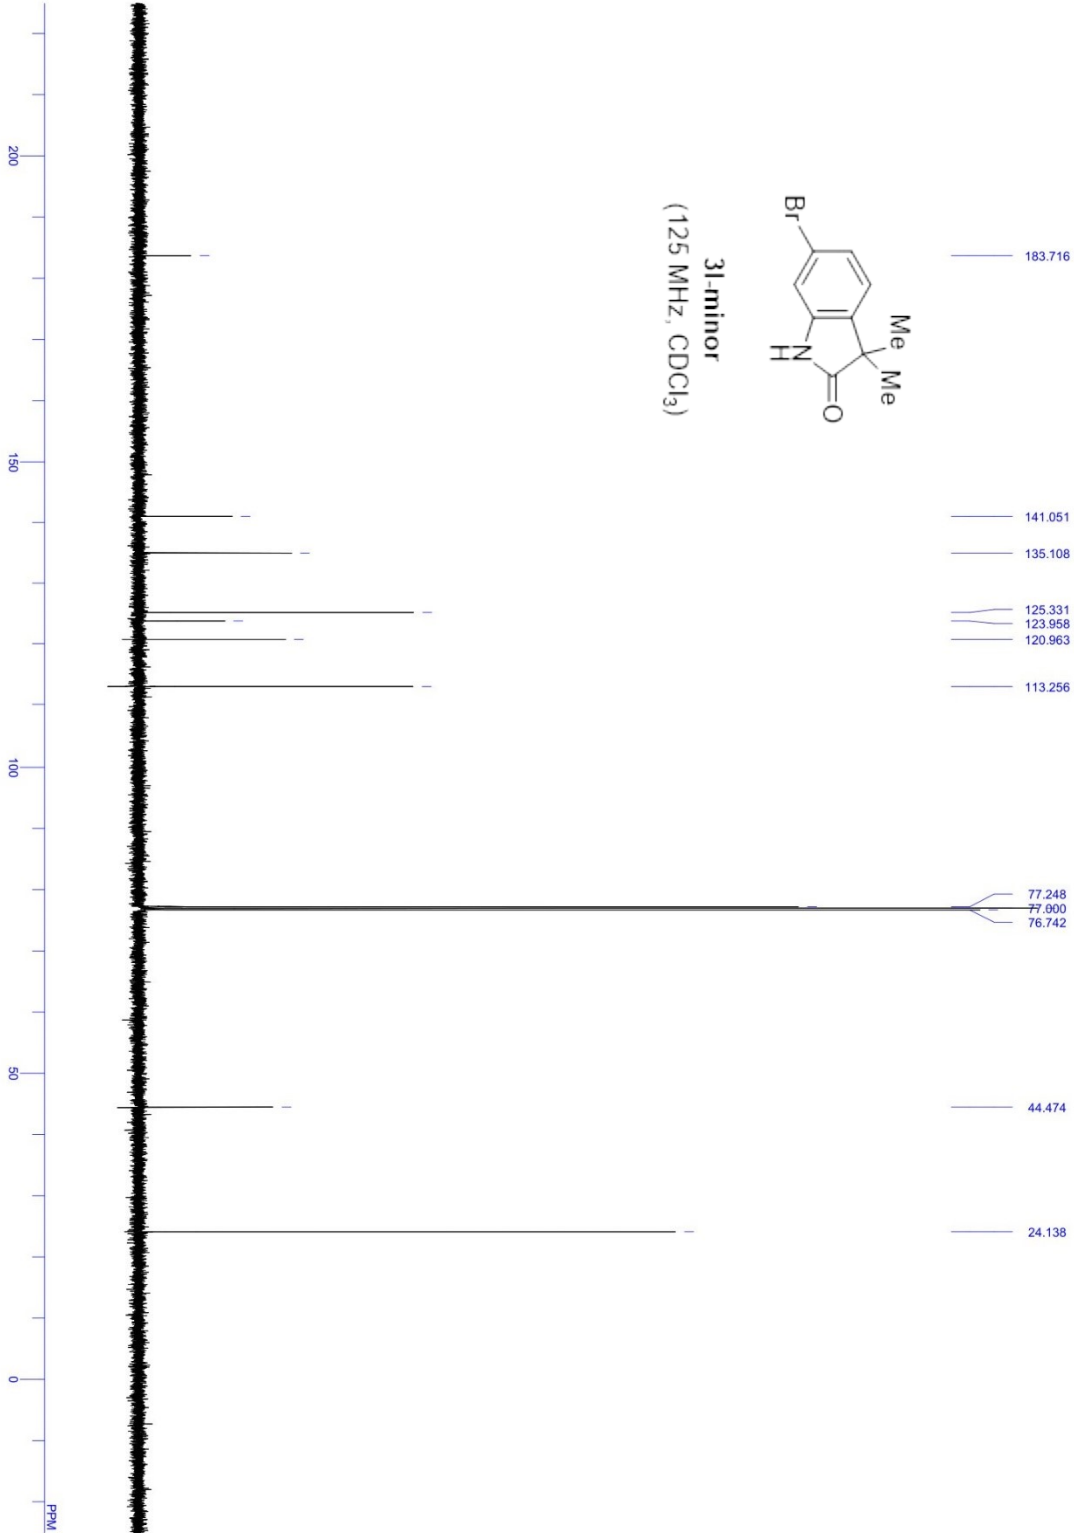

- 9.166
- 7.258
- 7.119
- 7.094
- 7.078
- 7.068
- 7.054
- 6.981
- 6.858
- 6.856
- 6.839
- 6.833
- 6.831
- 6.814
- 6.810
- 6.808
- 6.806
- 6.789

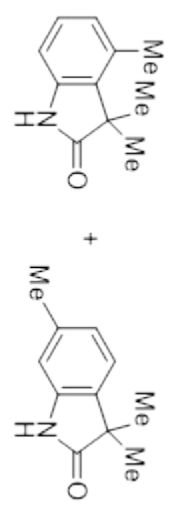

3m  
(500 MHz, CDCl<sub>3</sub>)

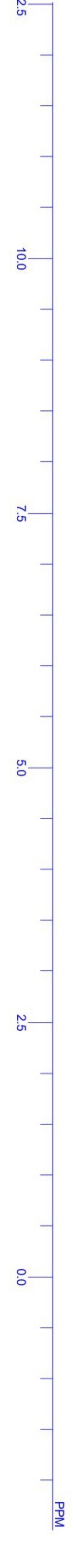

- 2.392
- 2.334
- 1.488
- 1.390
- 0.000

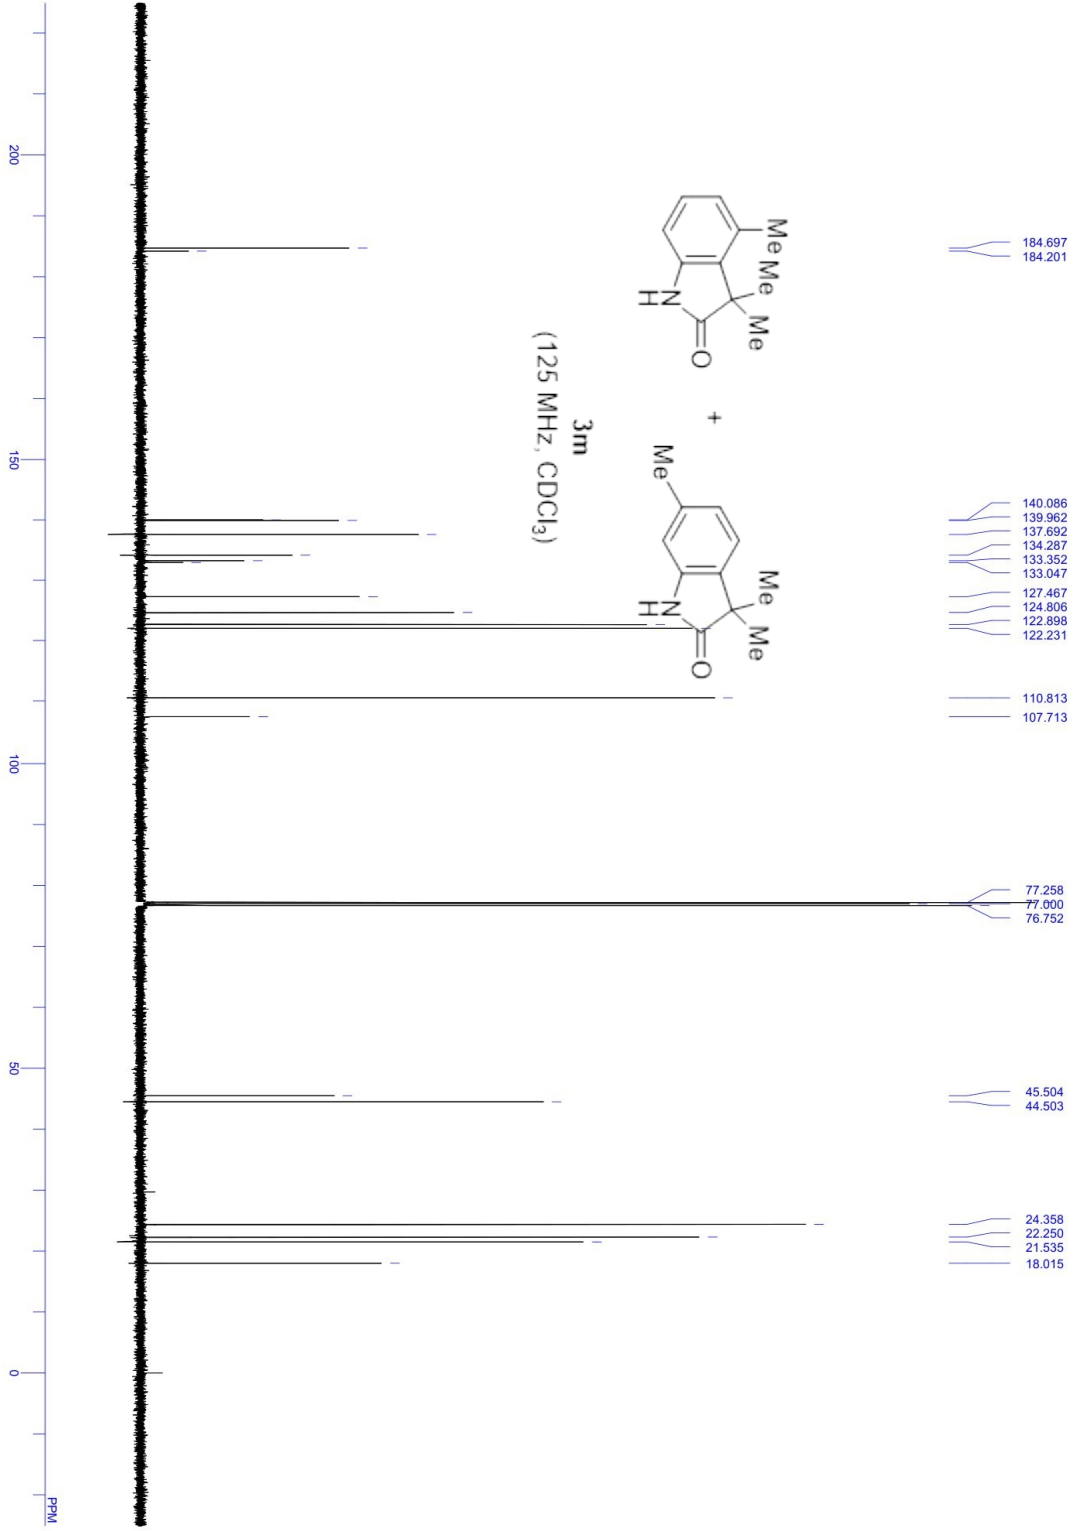



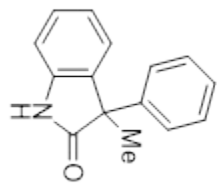

3n  
(500 MHz, CDCl<sub>3</sub>)

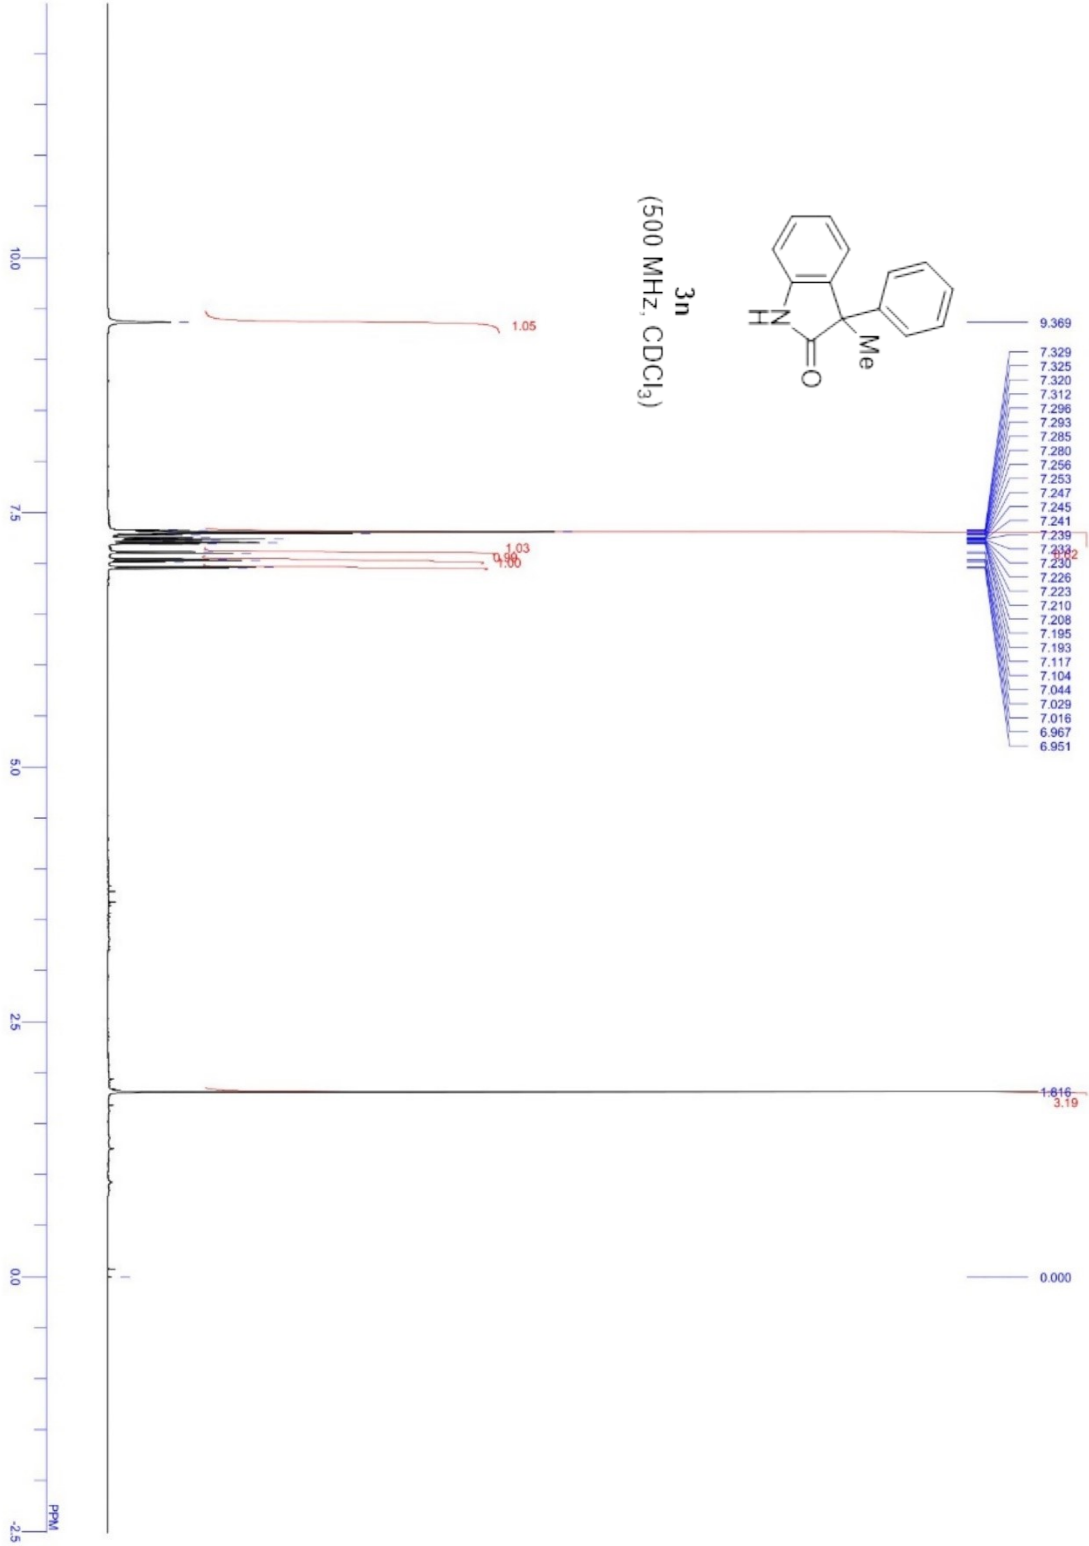

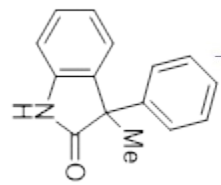

3n  
(125 MHz, CDCl<sub>3</sub>)

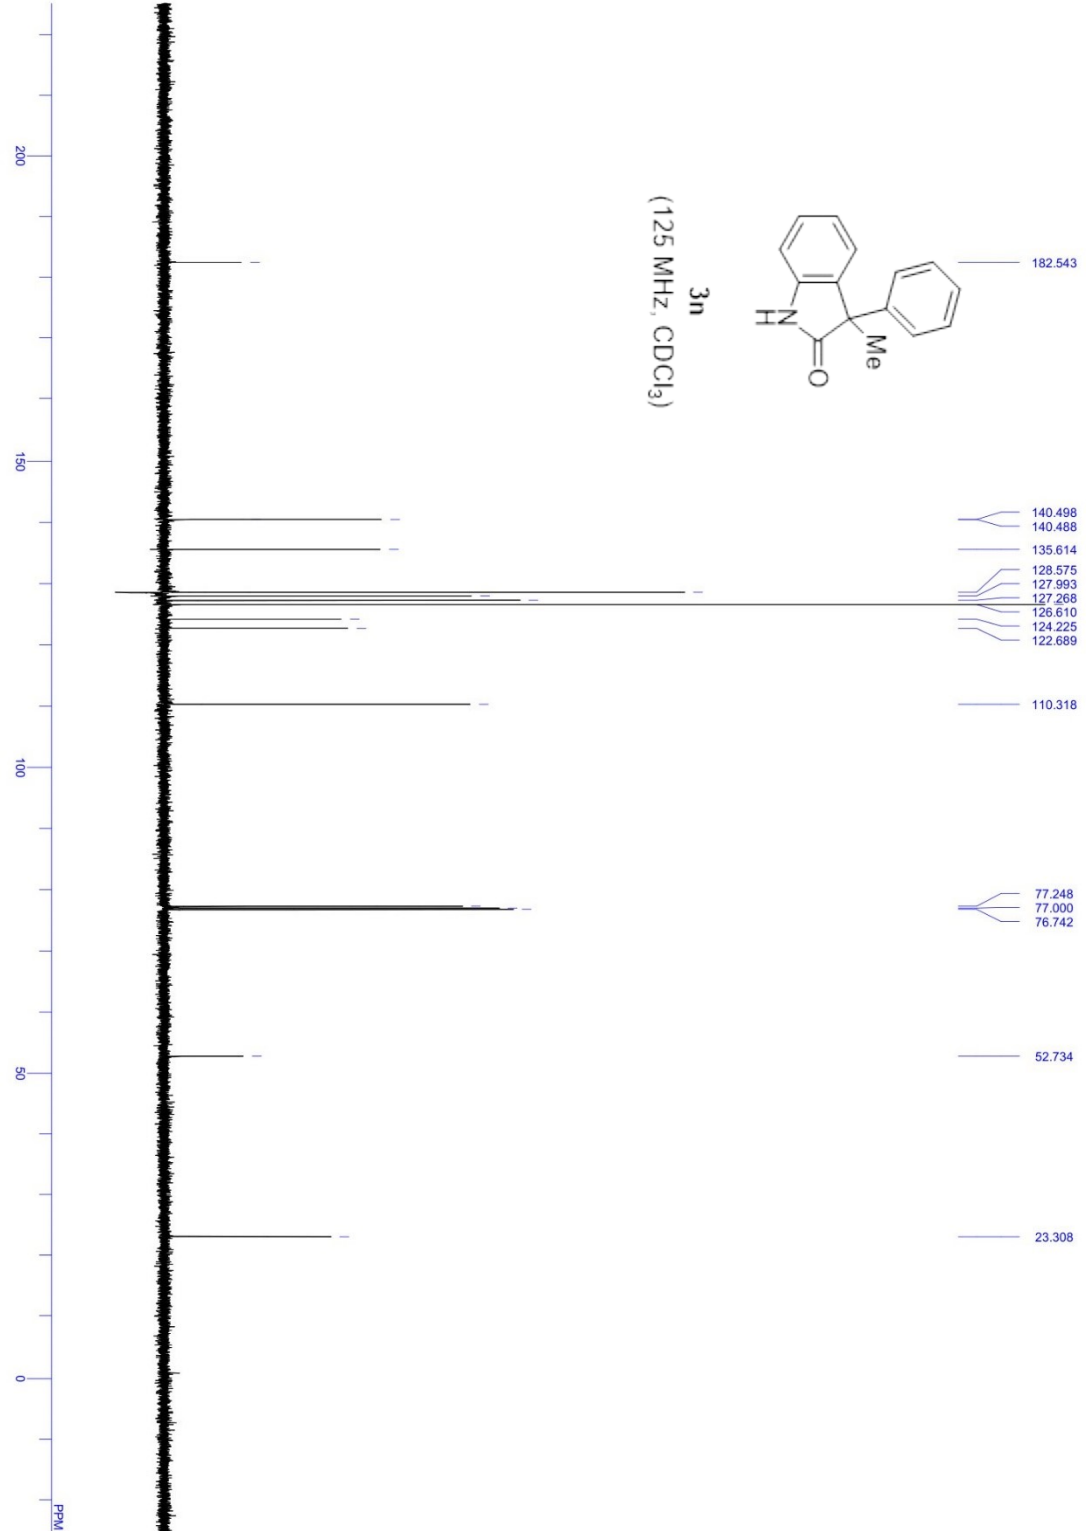

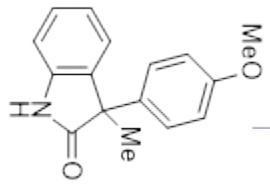

30  
(500 MHz, CDCl<sub>3</sub>)

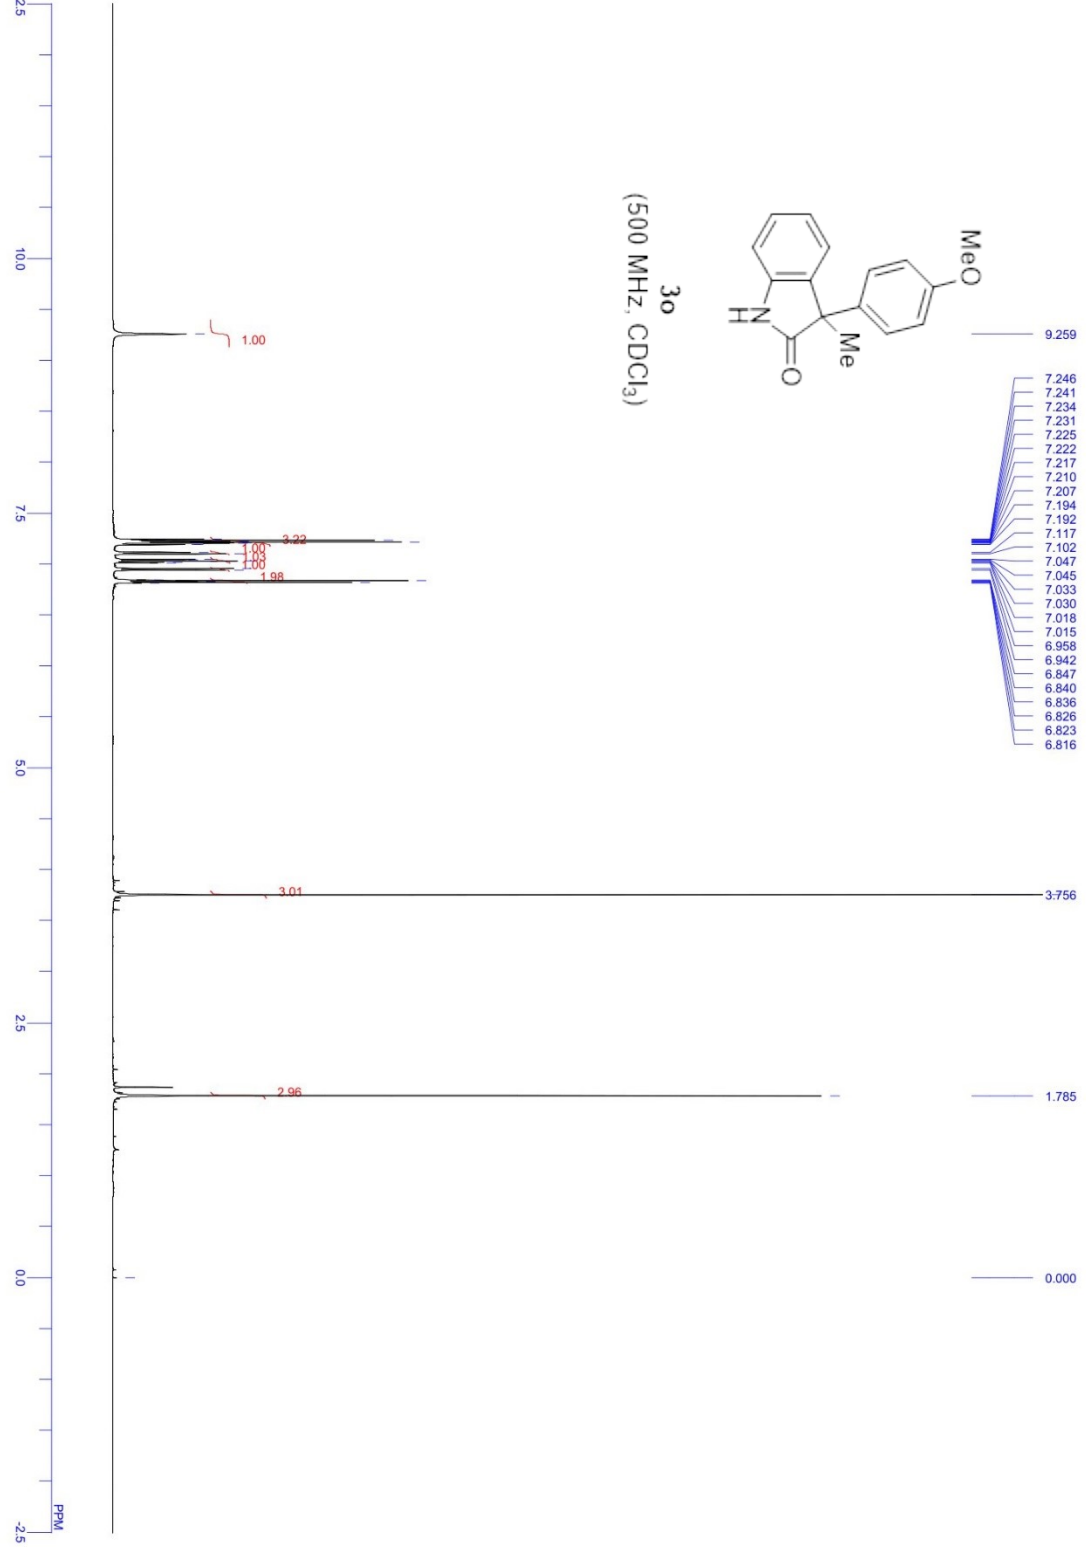

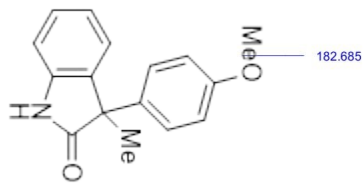

3o  
(125 MHz, CDCl<sub>3</sub>)

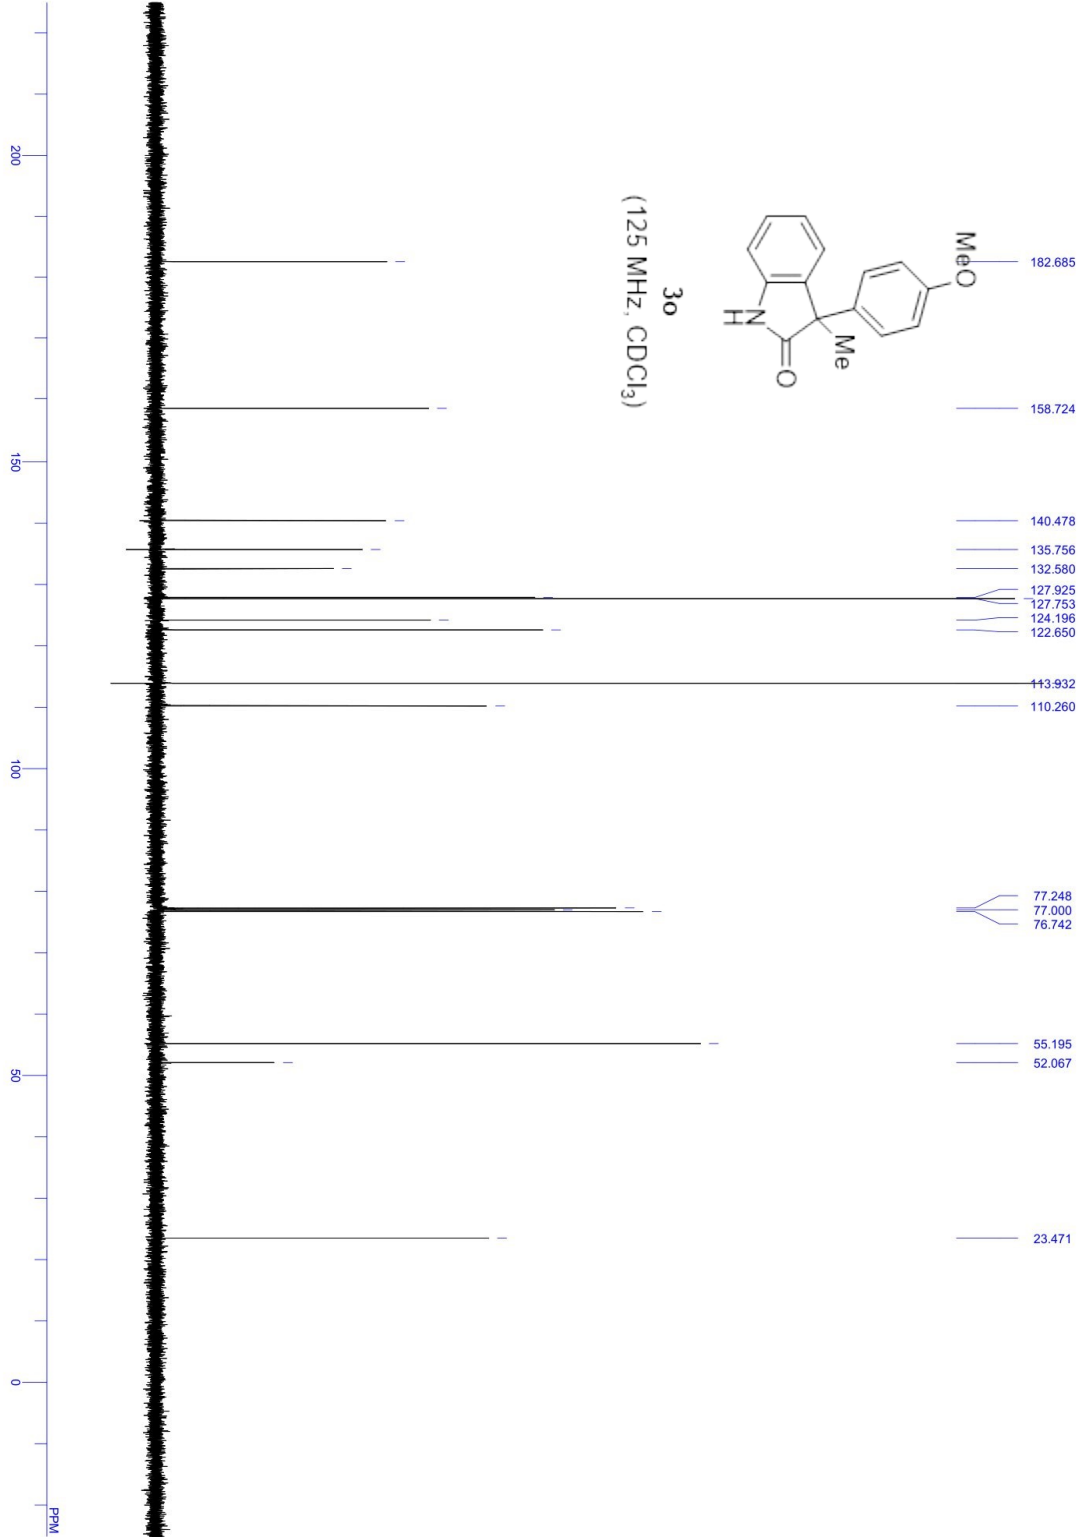

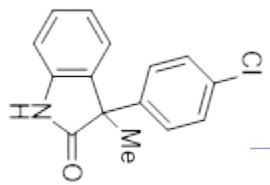

3p  
(500 MHz, CDCl<sub>3</sub>)

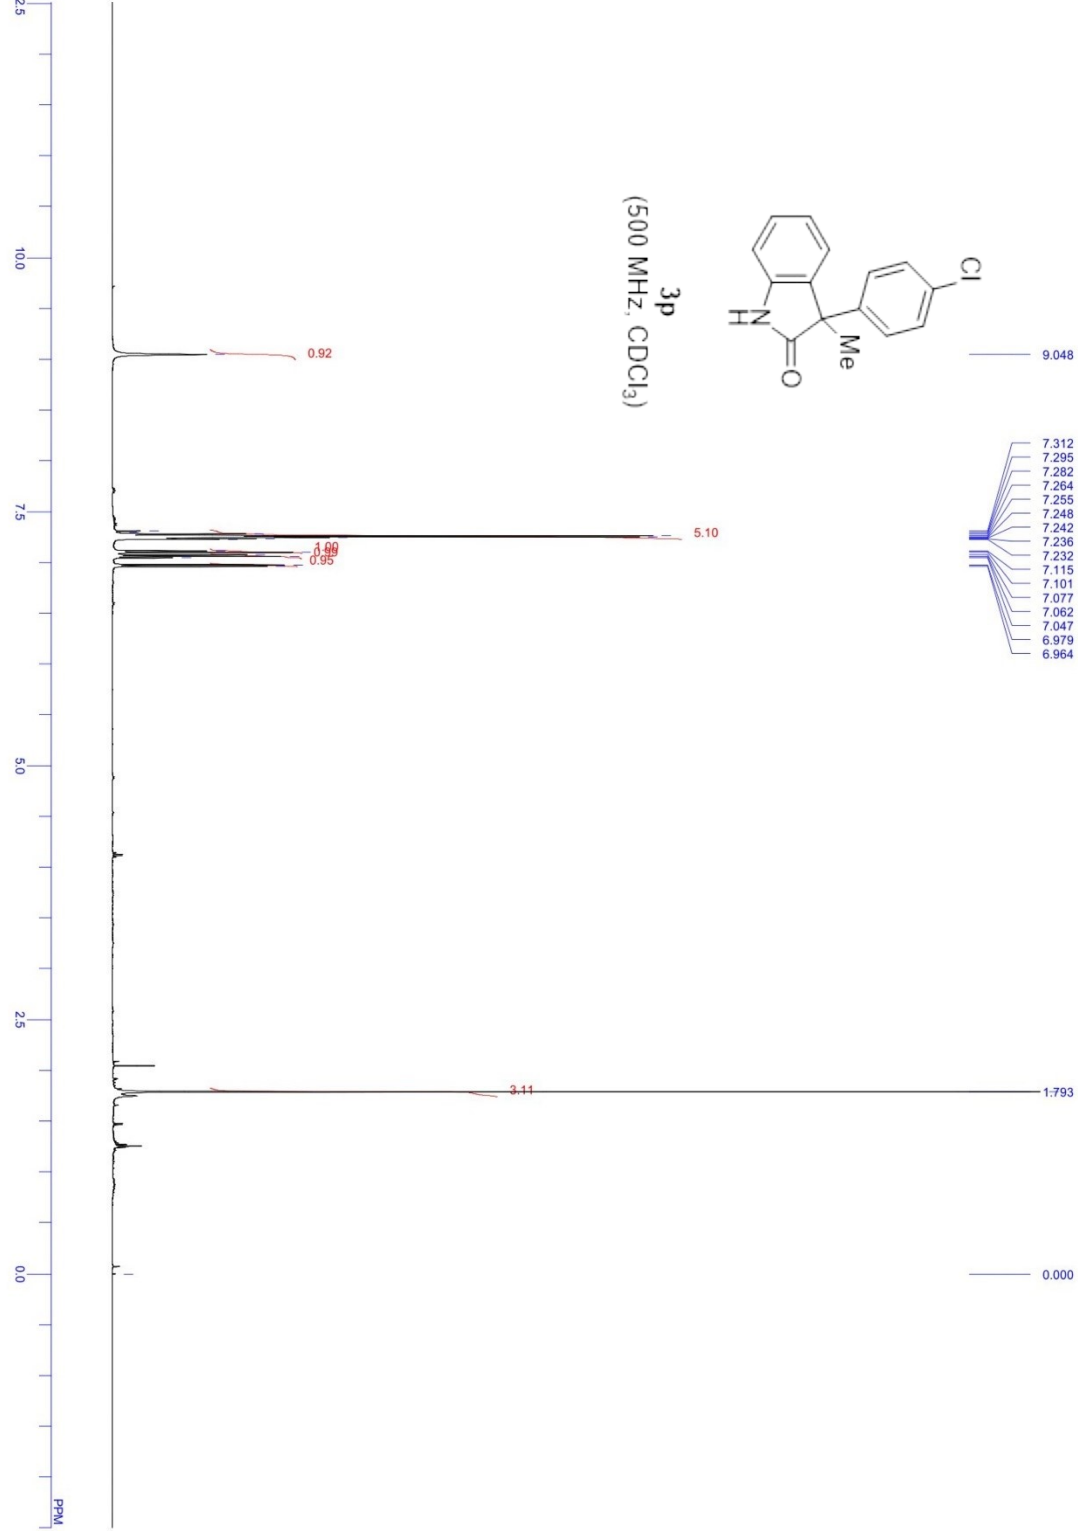

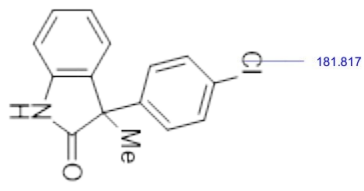

3p  
(125 MHz, CDCl<sub>3</sub>)

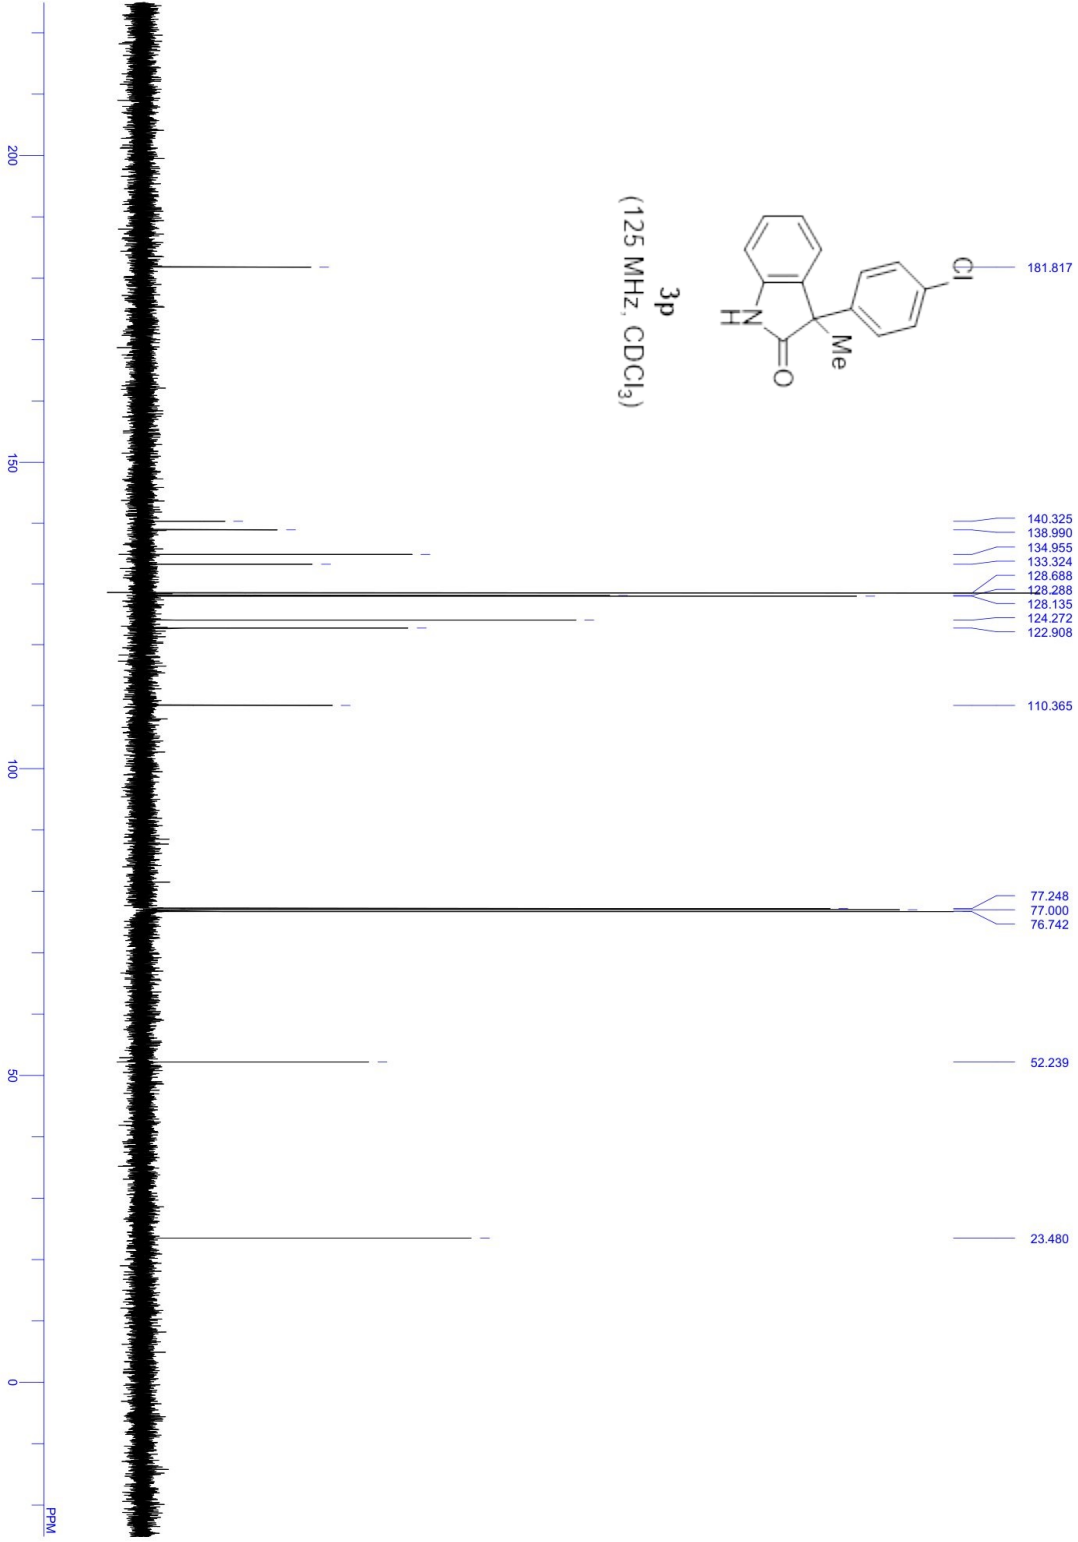

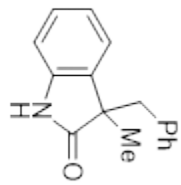

3q  
(500 MHz, CDCl<sub>3</sub>)

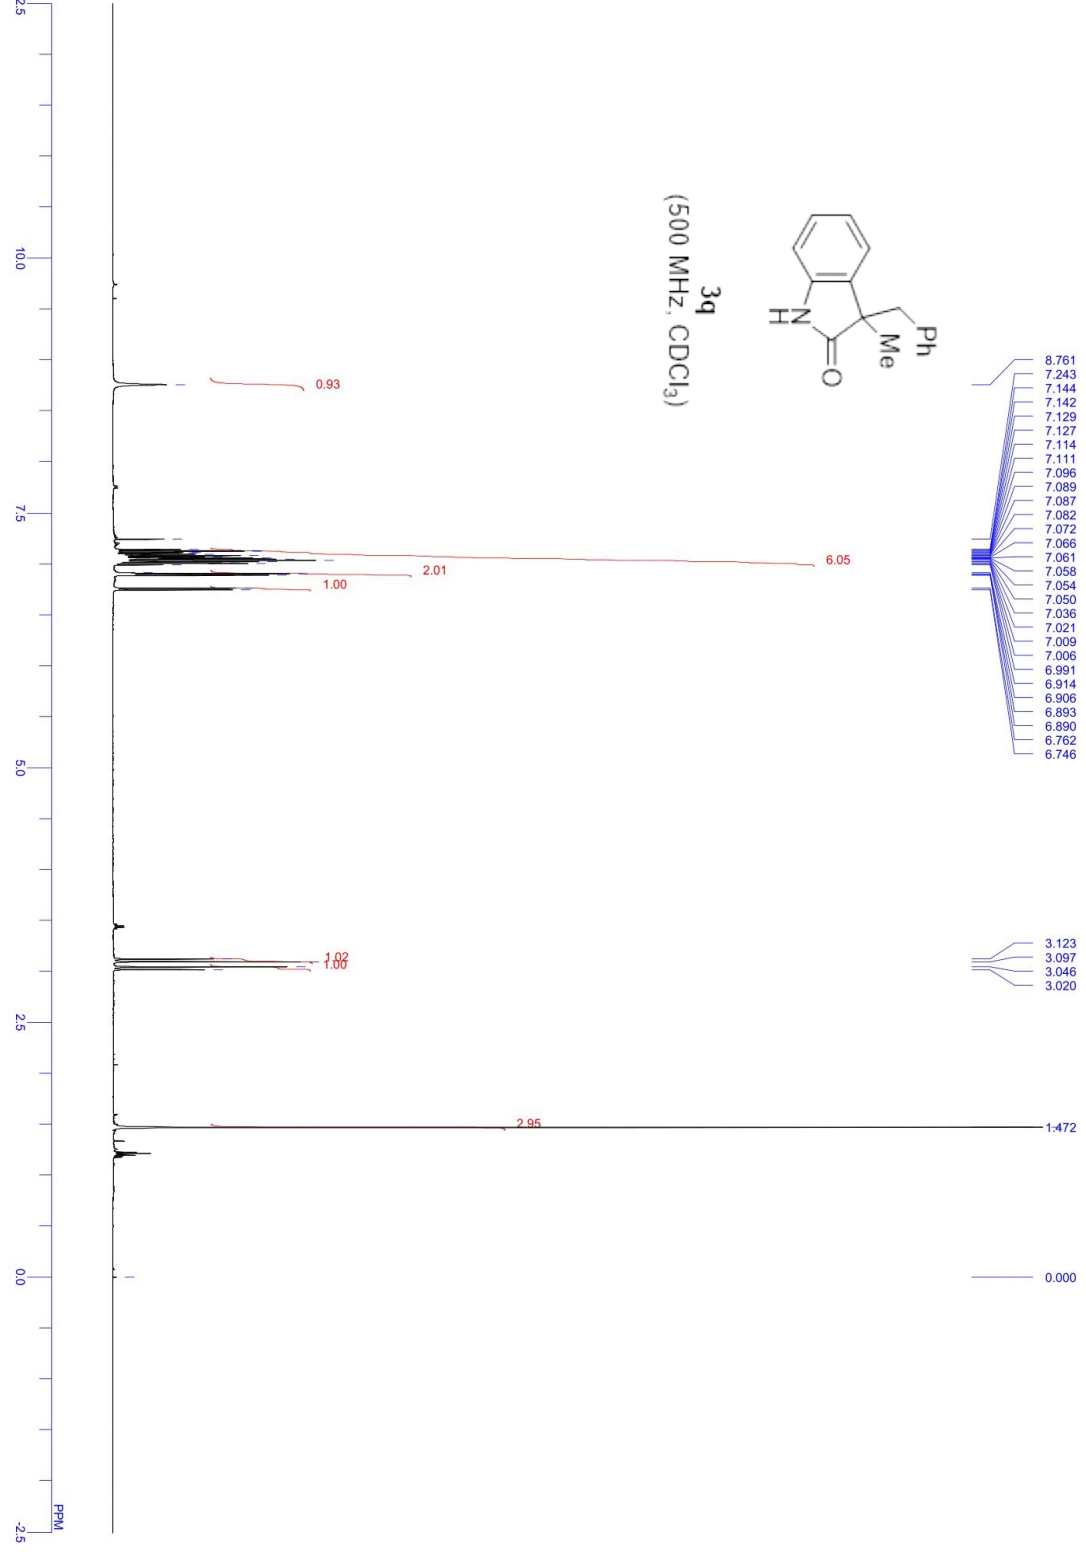

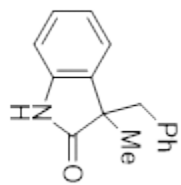

3q  
(125 MHz, CDCl<sub>3</sub>)

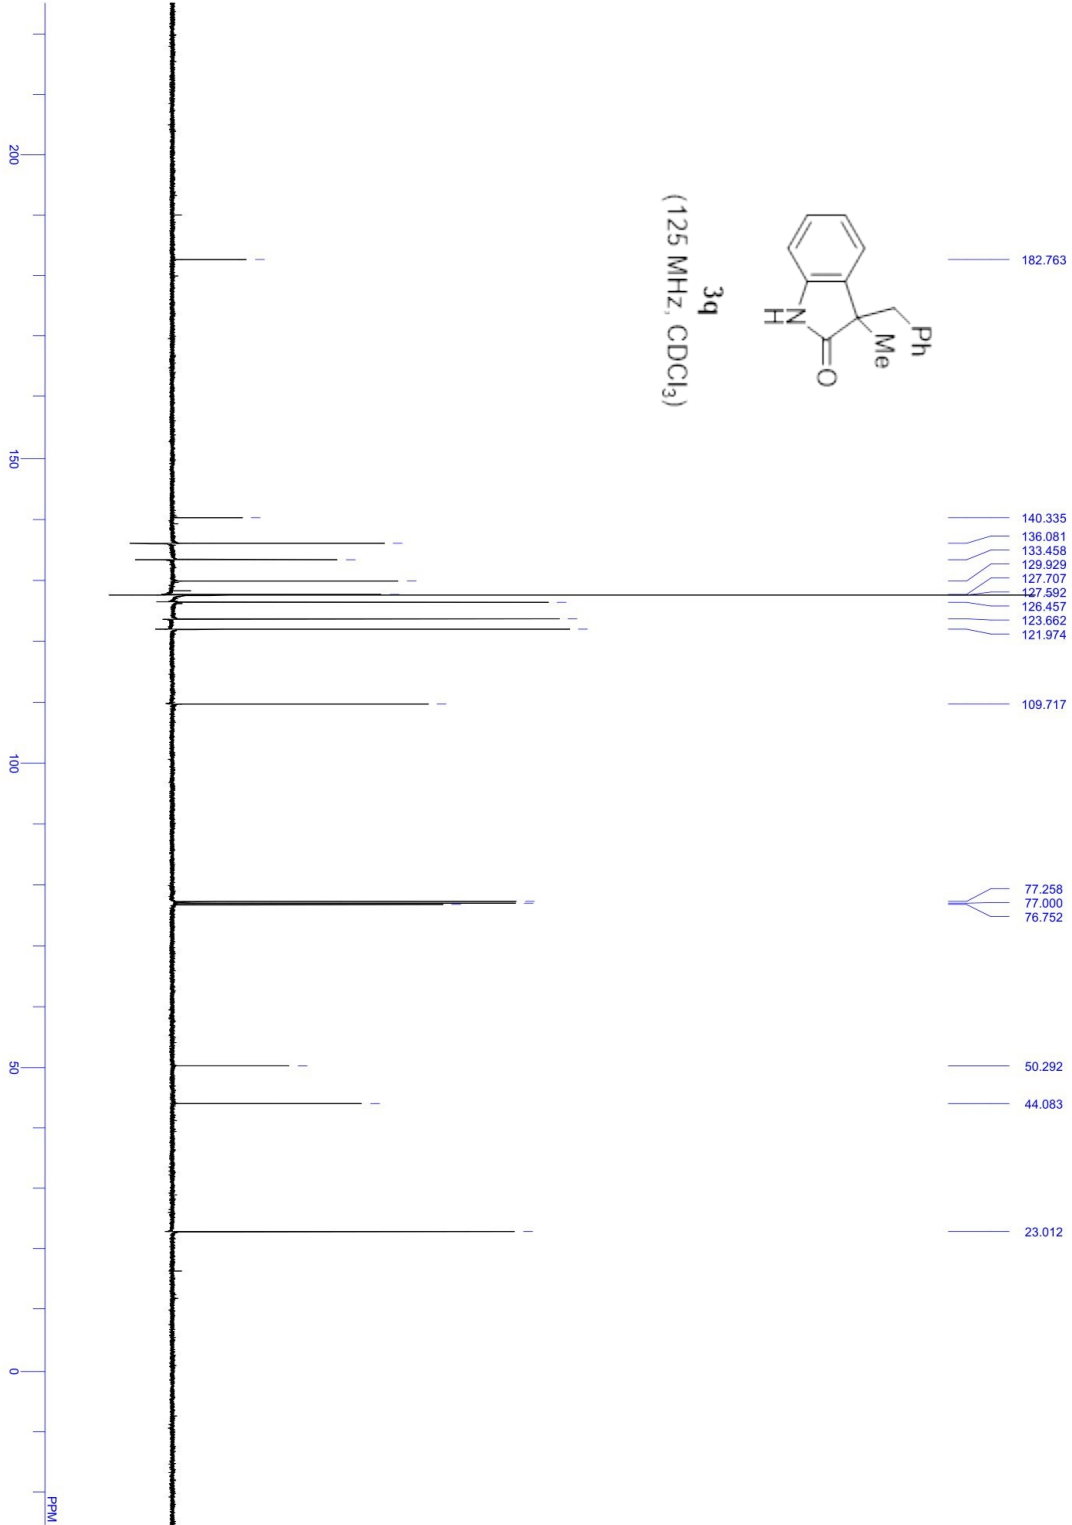



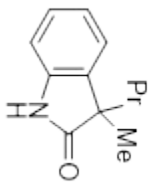

3r  
(500 MHz, CDCl<sub>3</sub>)

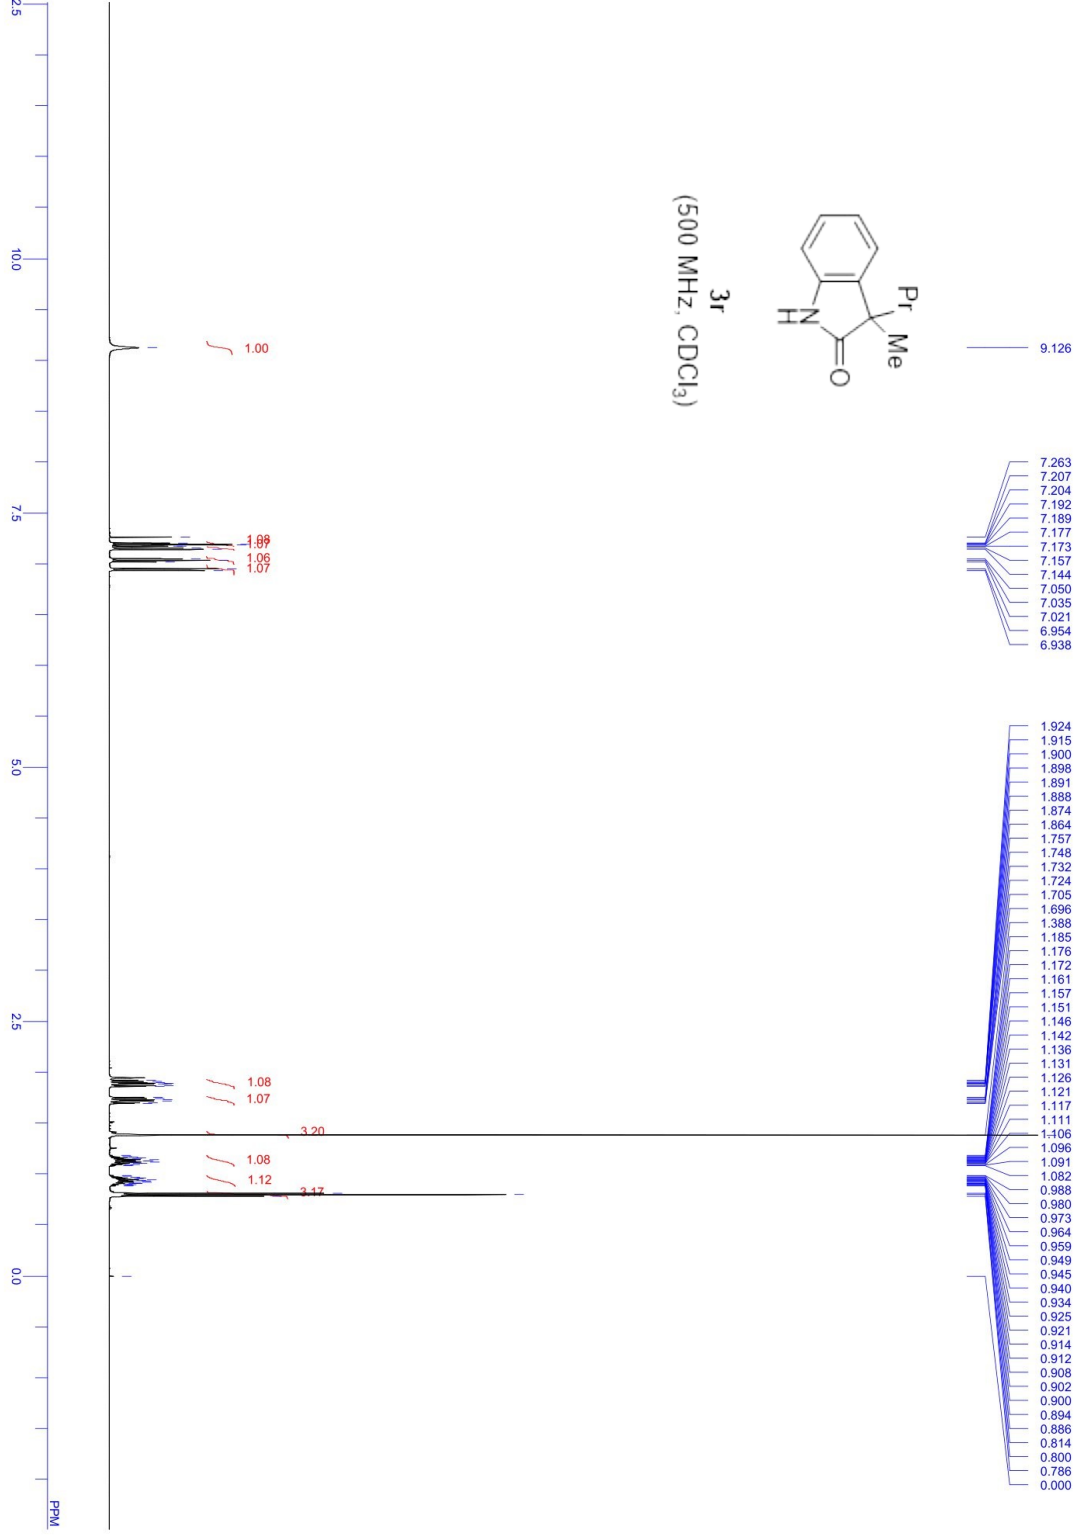

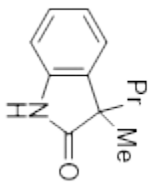

(125 MHz, CDCl<sub>3</sub>)

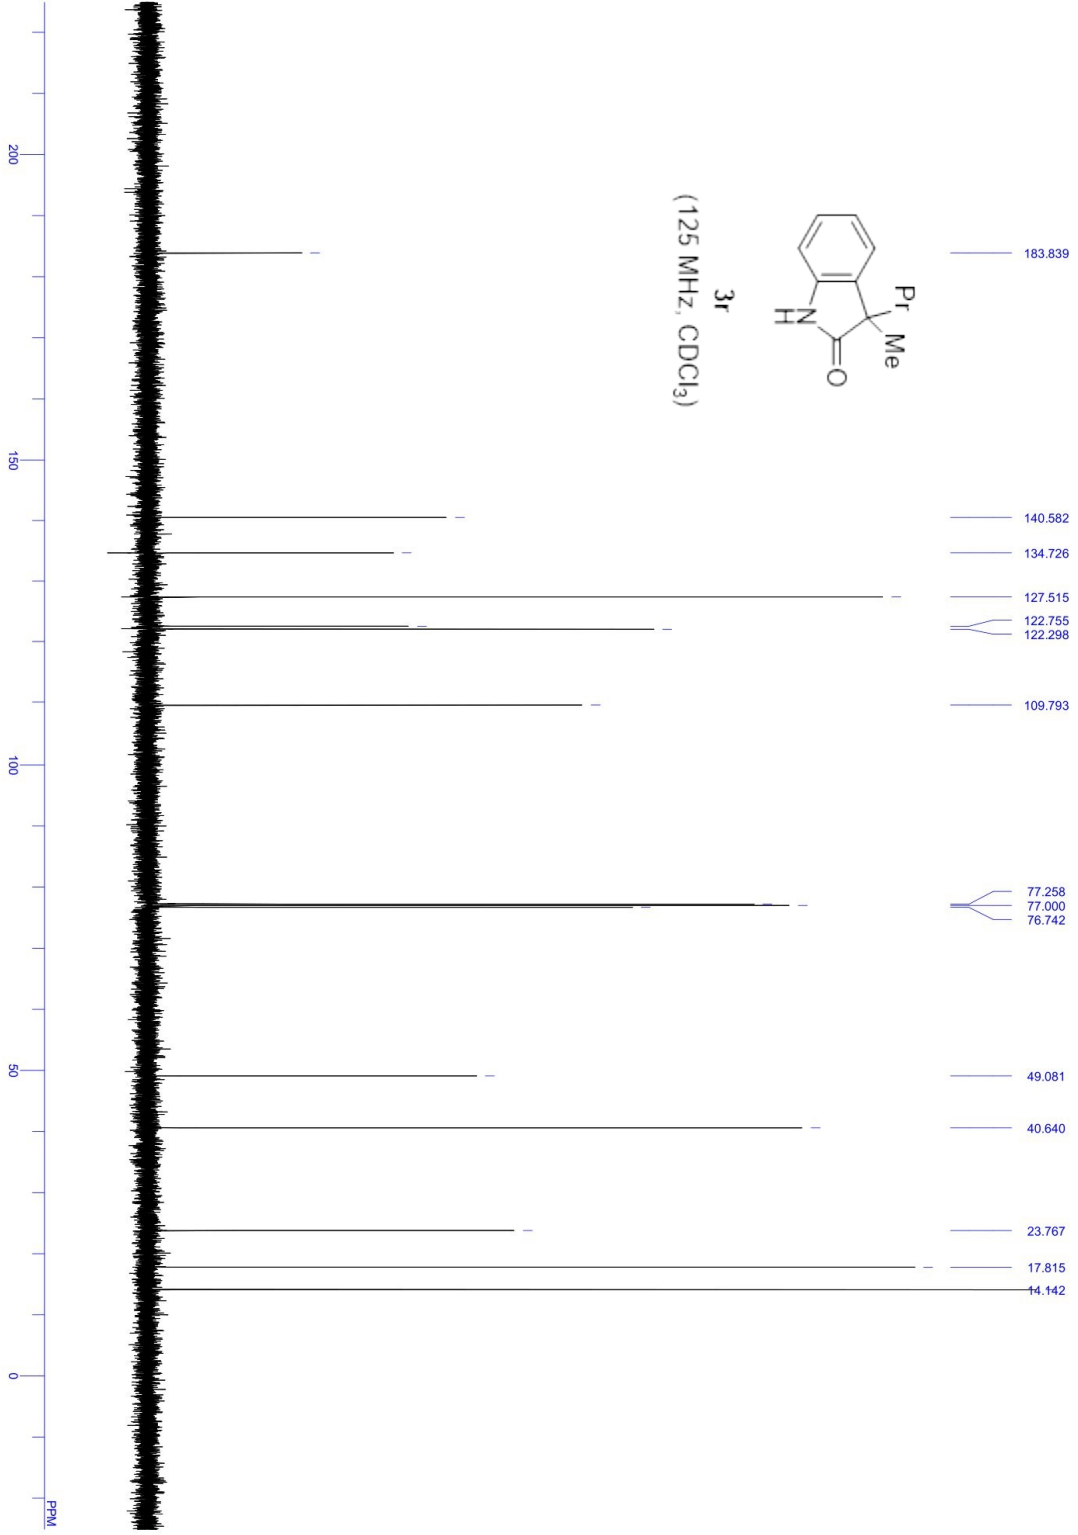

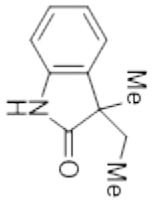

3s  
(500 MHz, CDCl<sub>3</sub>)

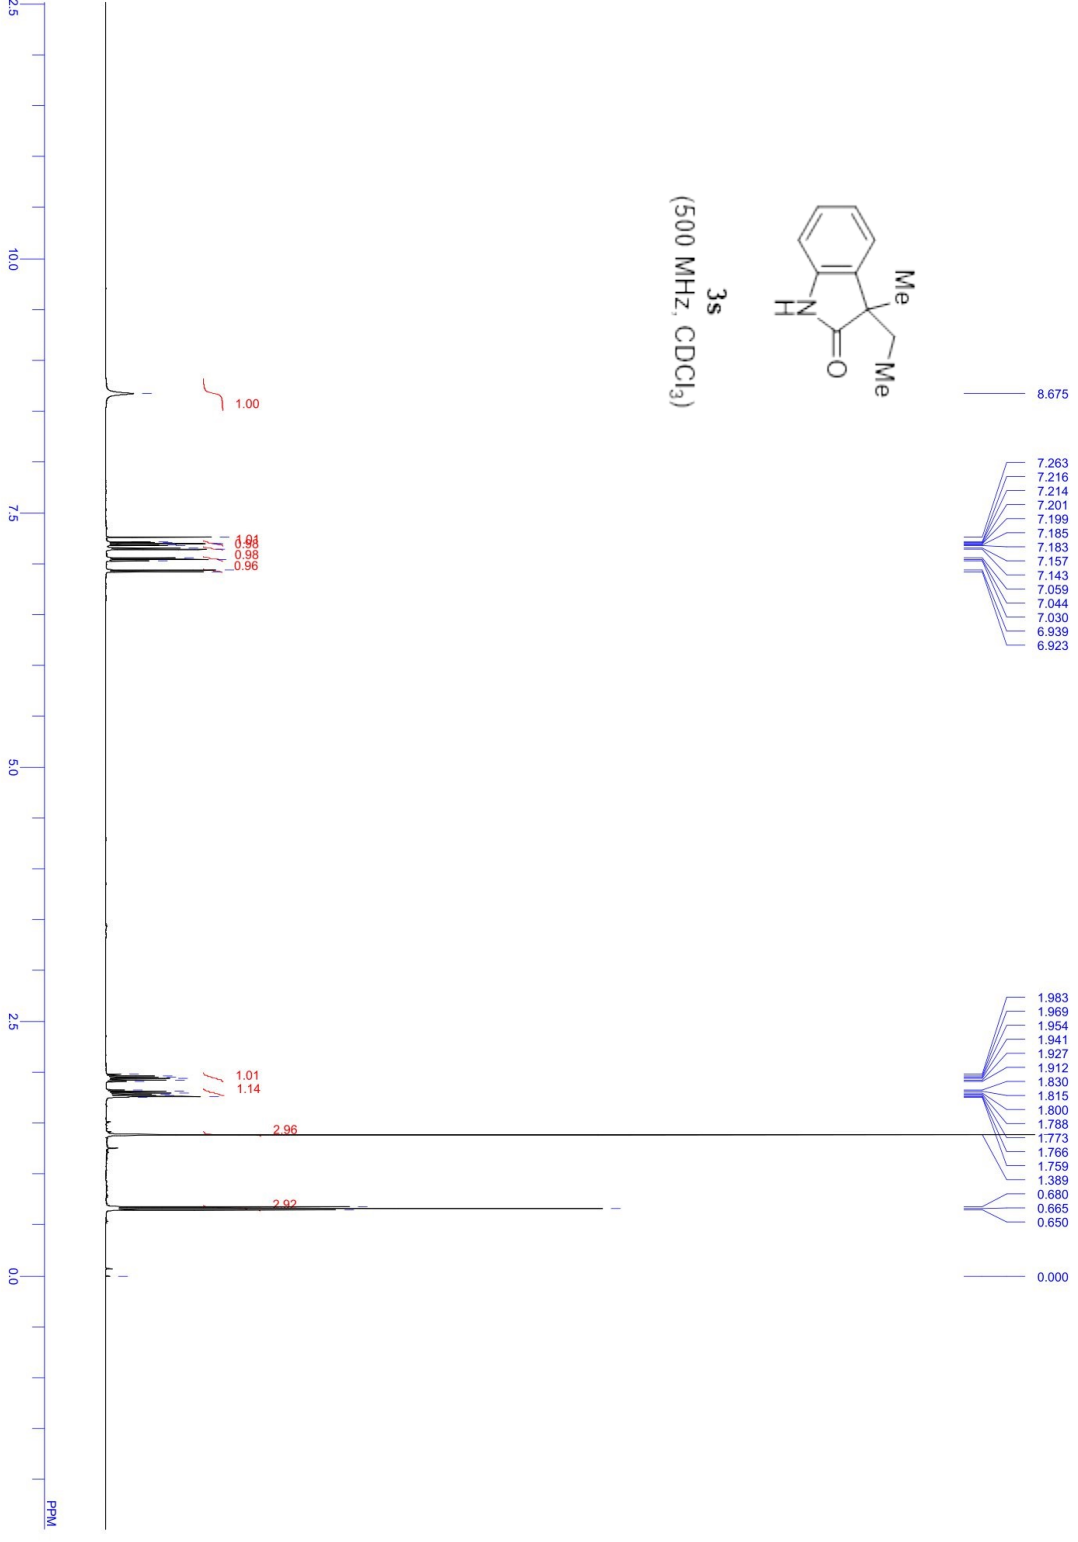

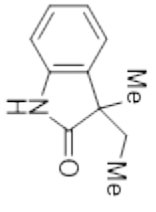

3s  
(125 MHz, CDCl<sub>3</sub>)

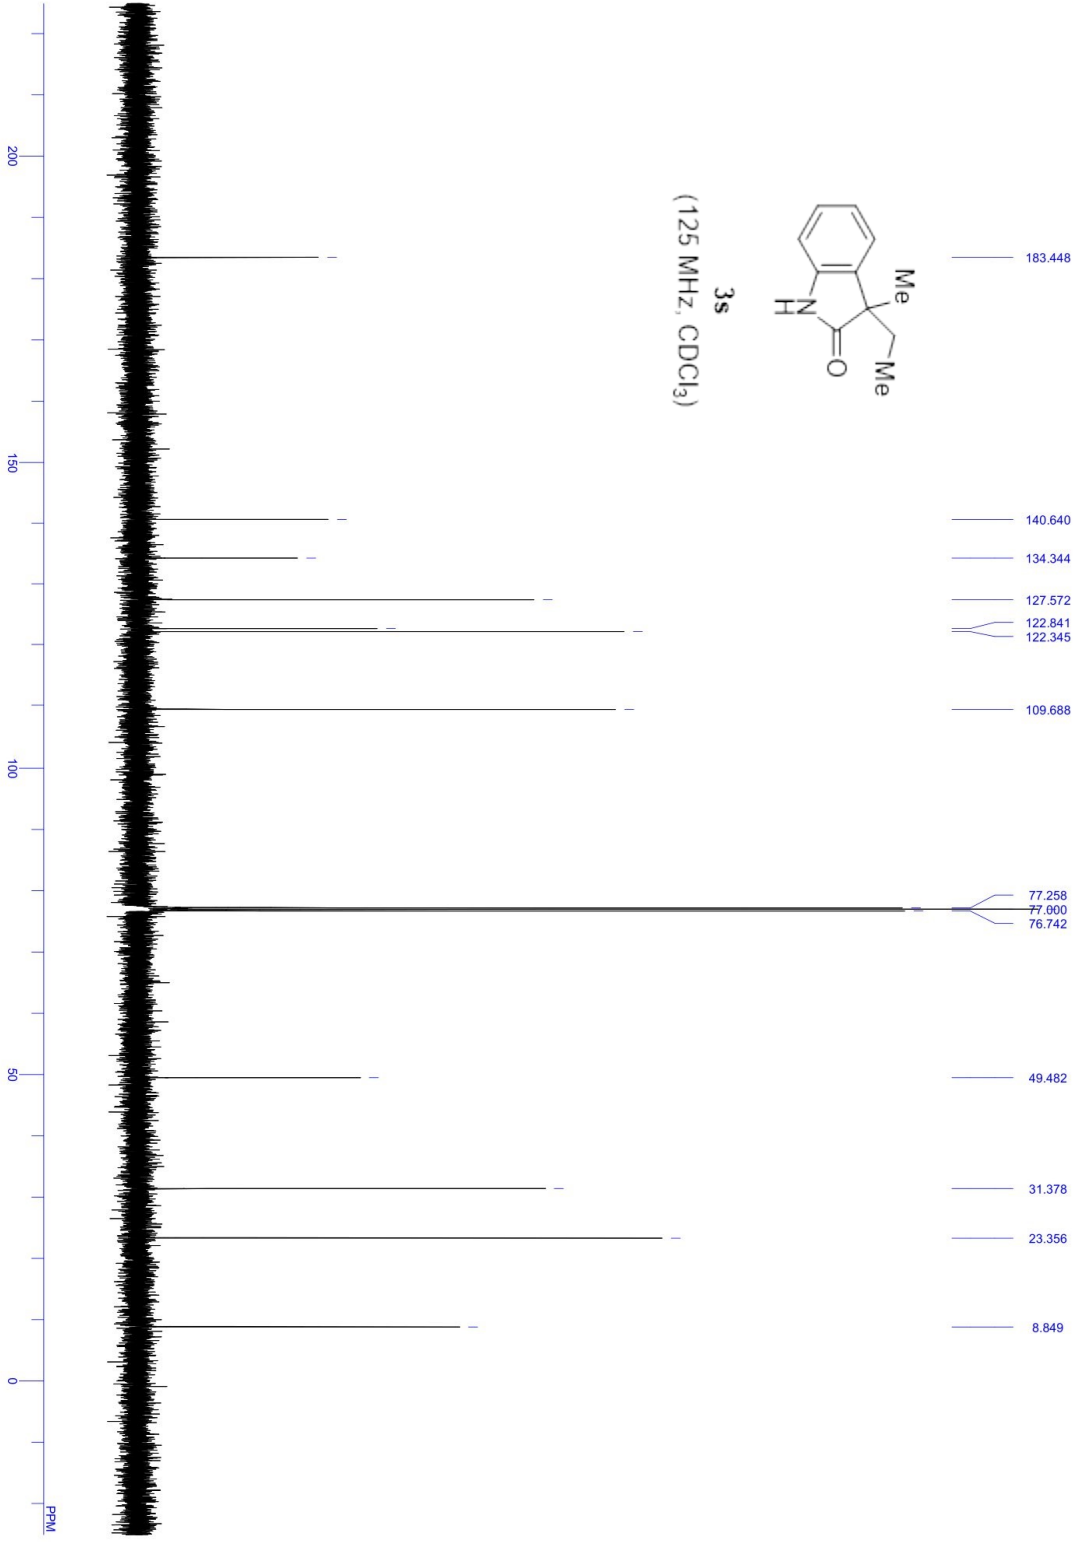

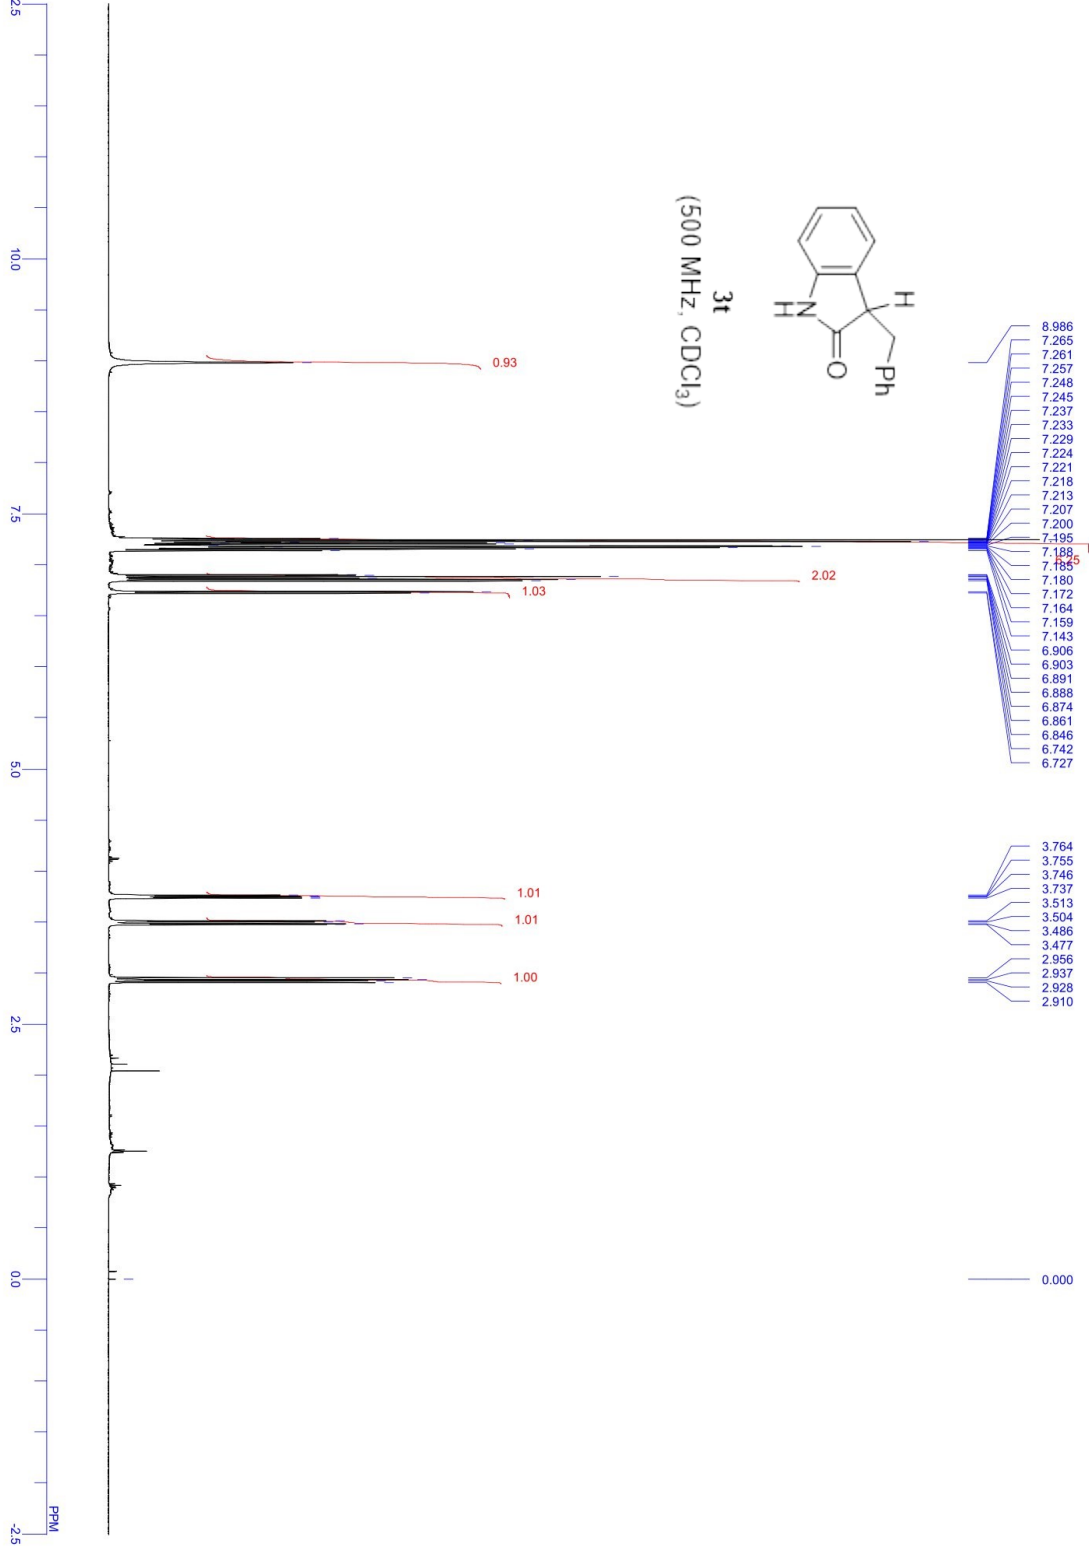

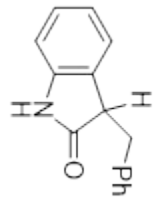

3t  
(125 MHz, CDCl<sub>3</sub>)

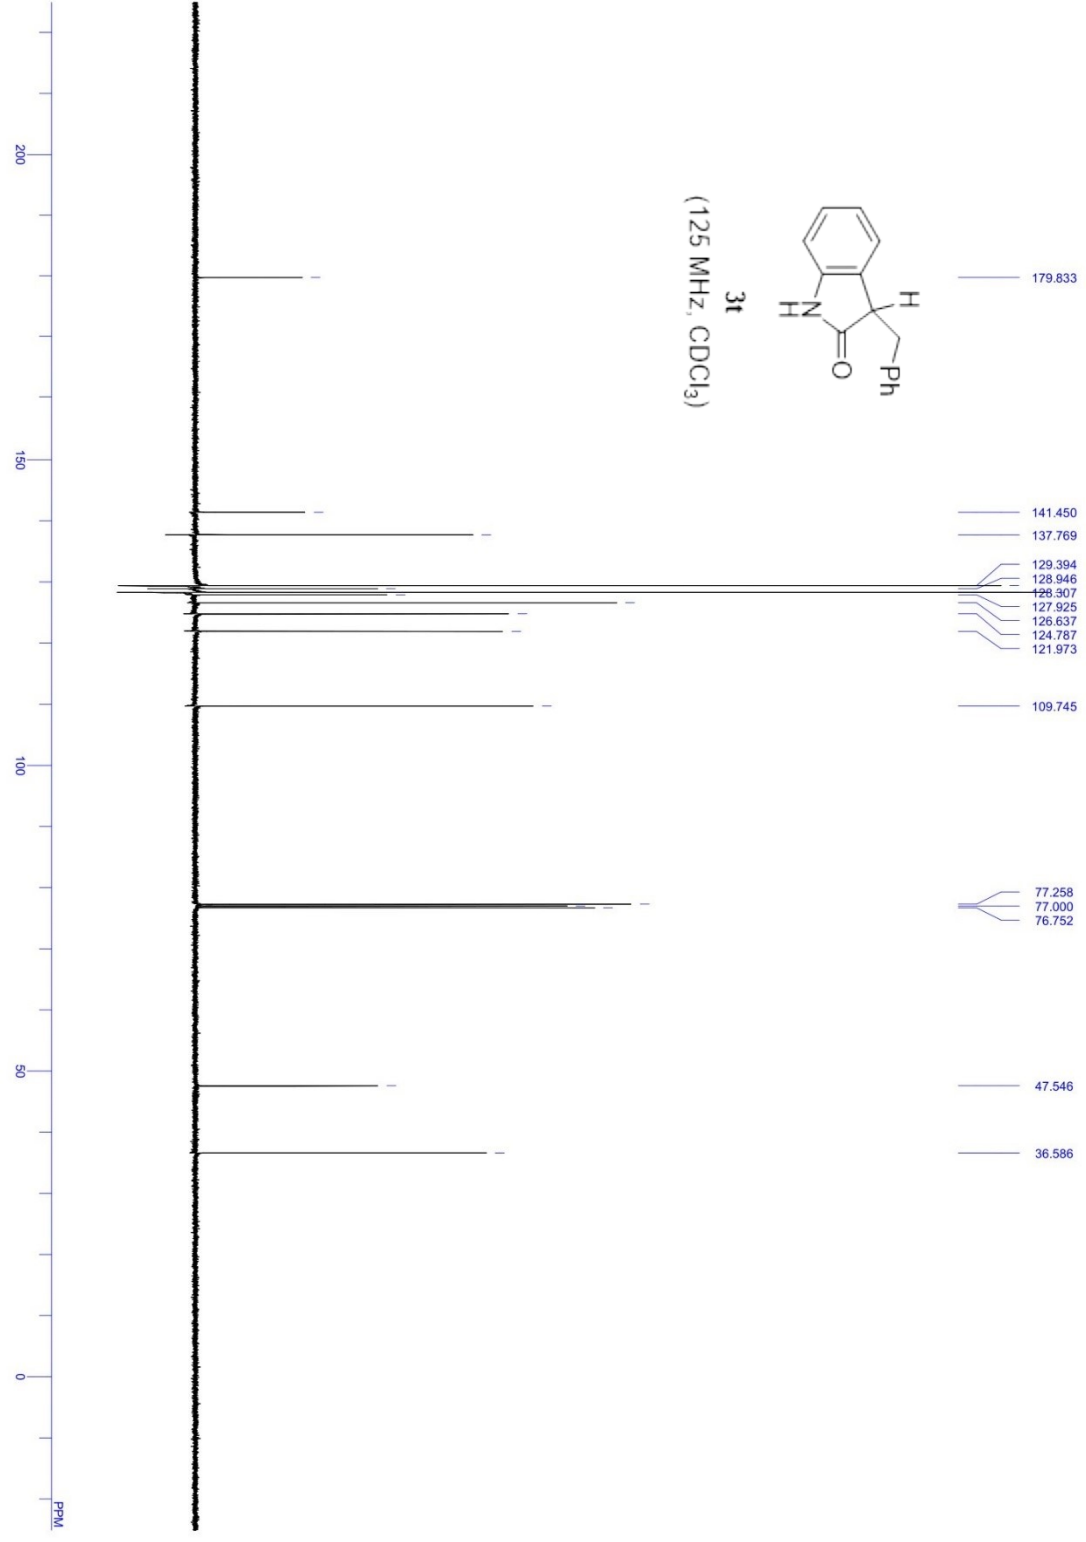

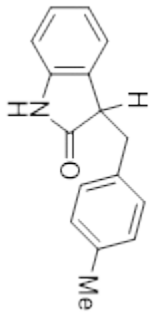

3u  
(500 MHz, CDCl<sub>3</sub>)

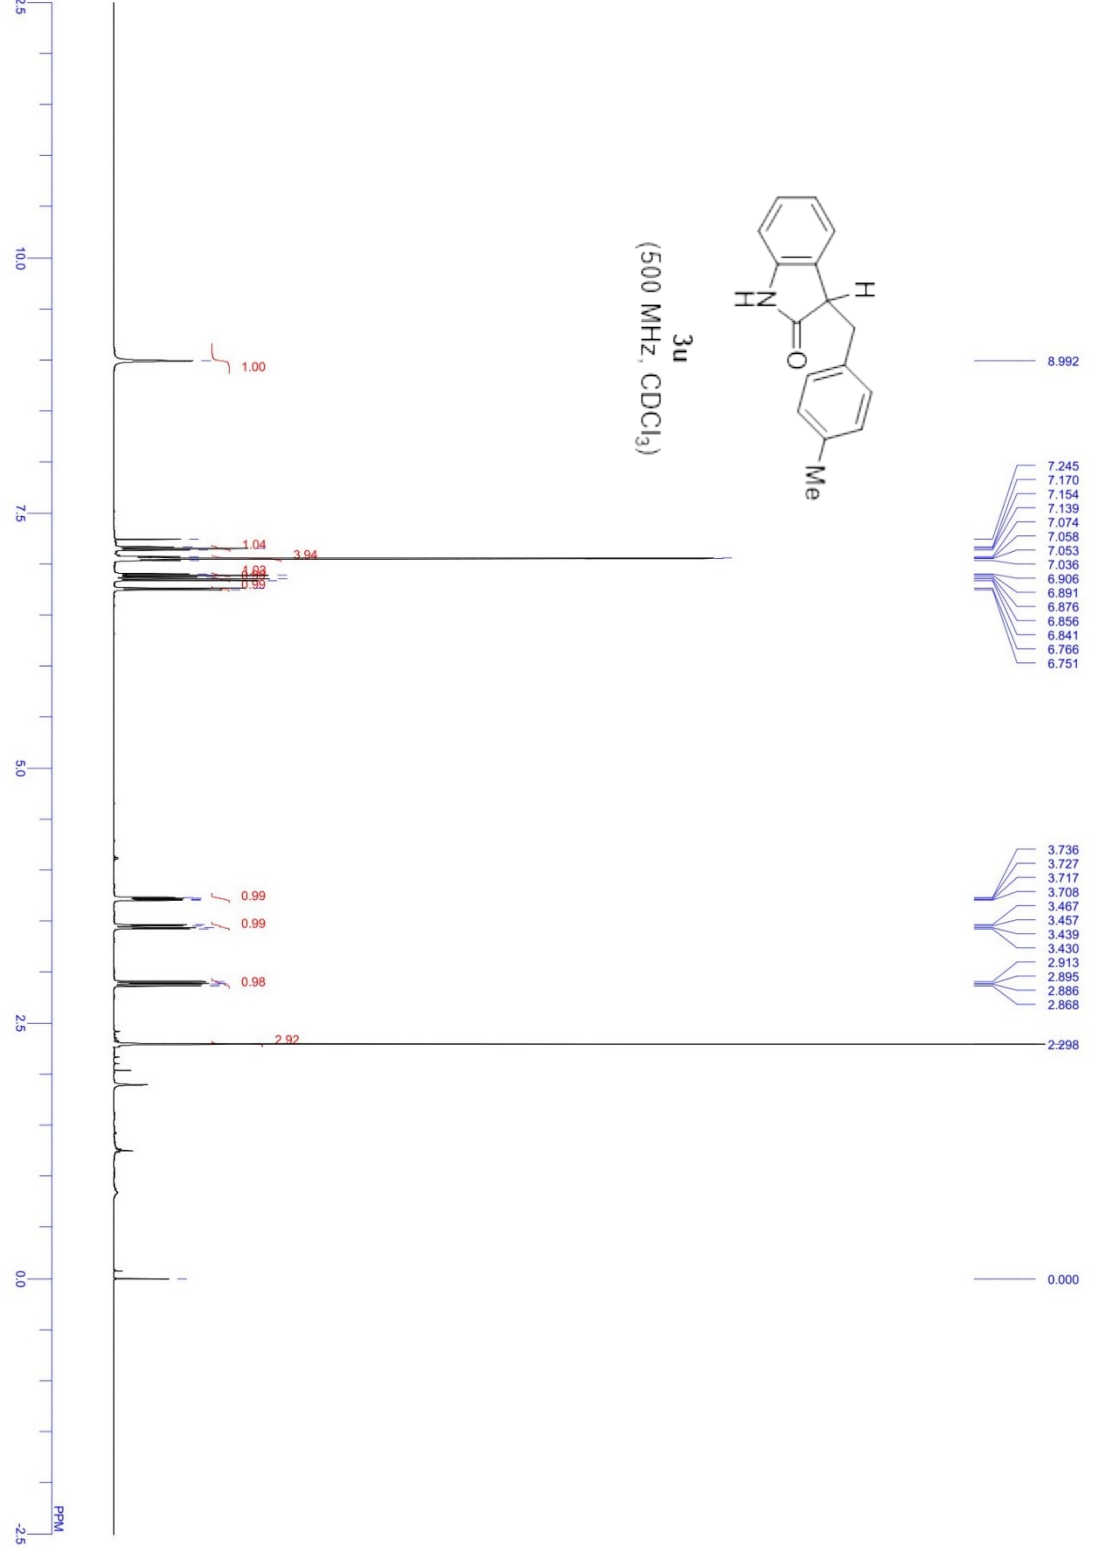

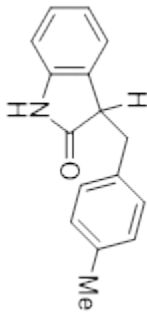

3u  
(125 MHz, CDCl<sub>3</sub>)

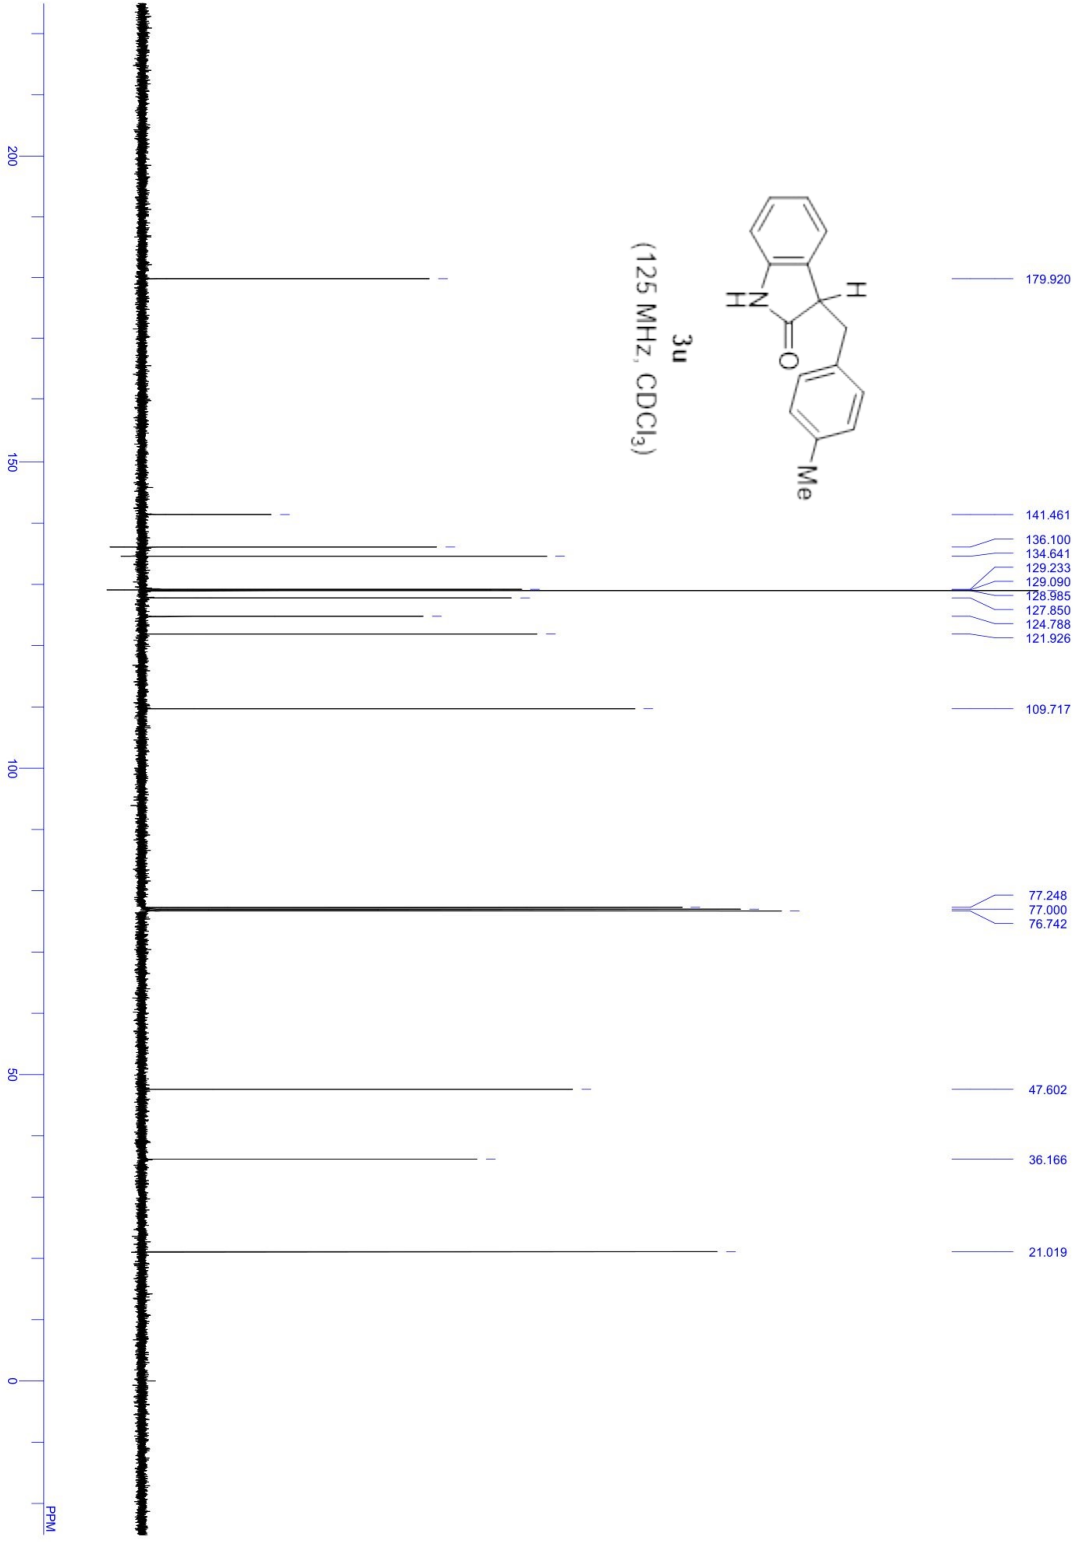



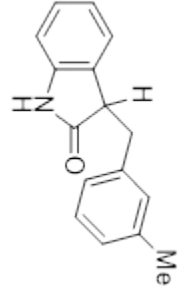

3v  
(500 MHz, CDCl<sub>3</sub>)

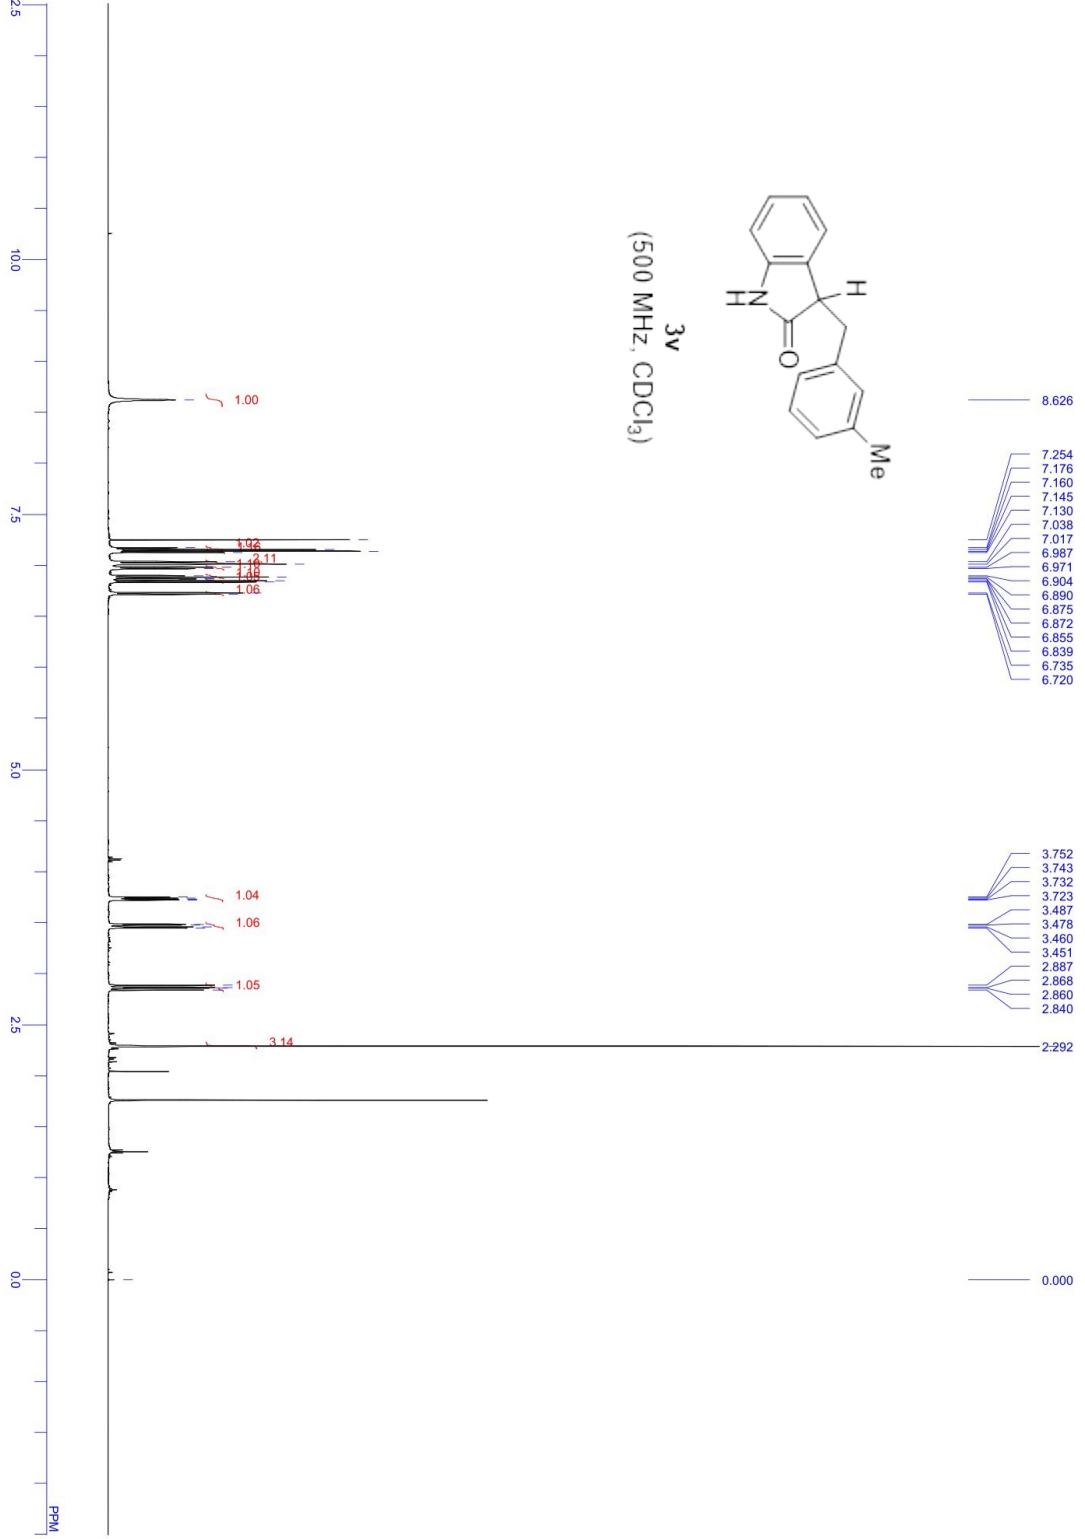

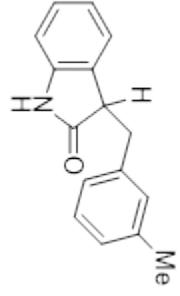

3v  
(125 MHz, CDCl<sub>3</sub>)

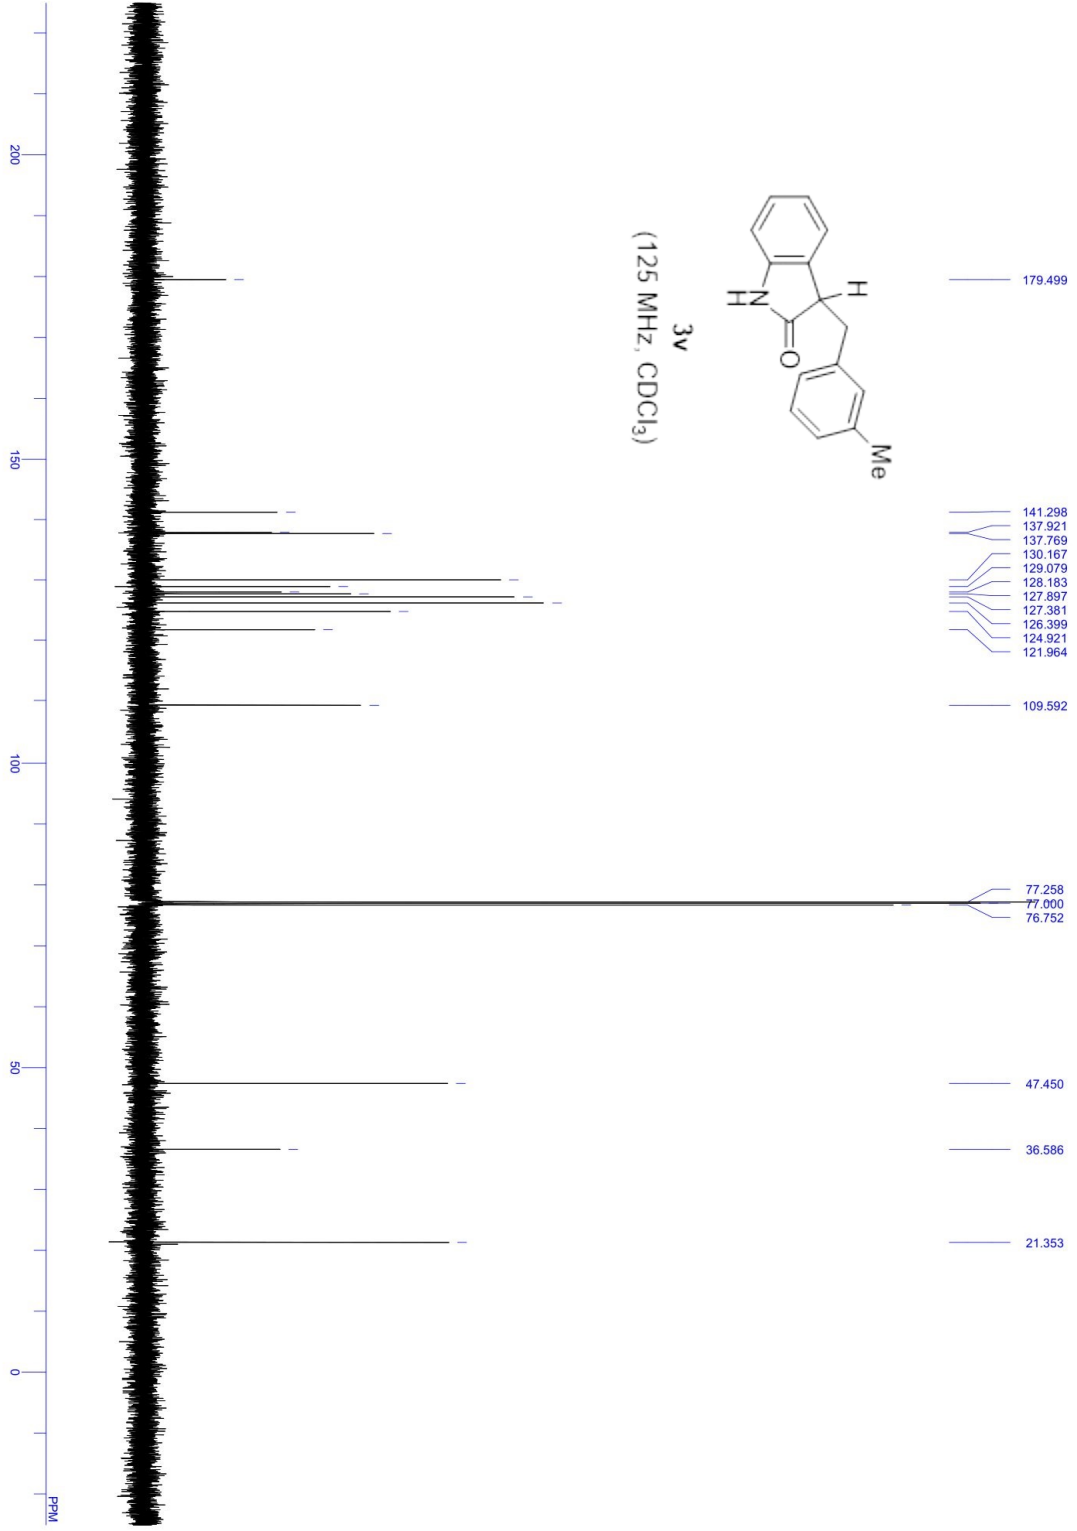

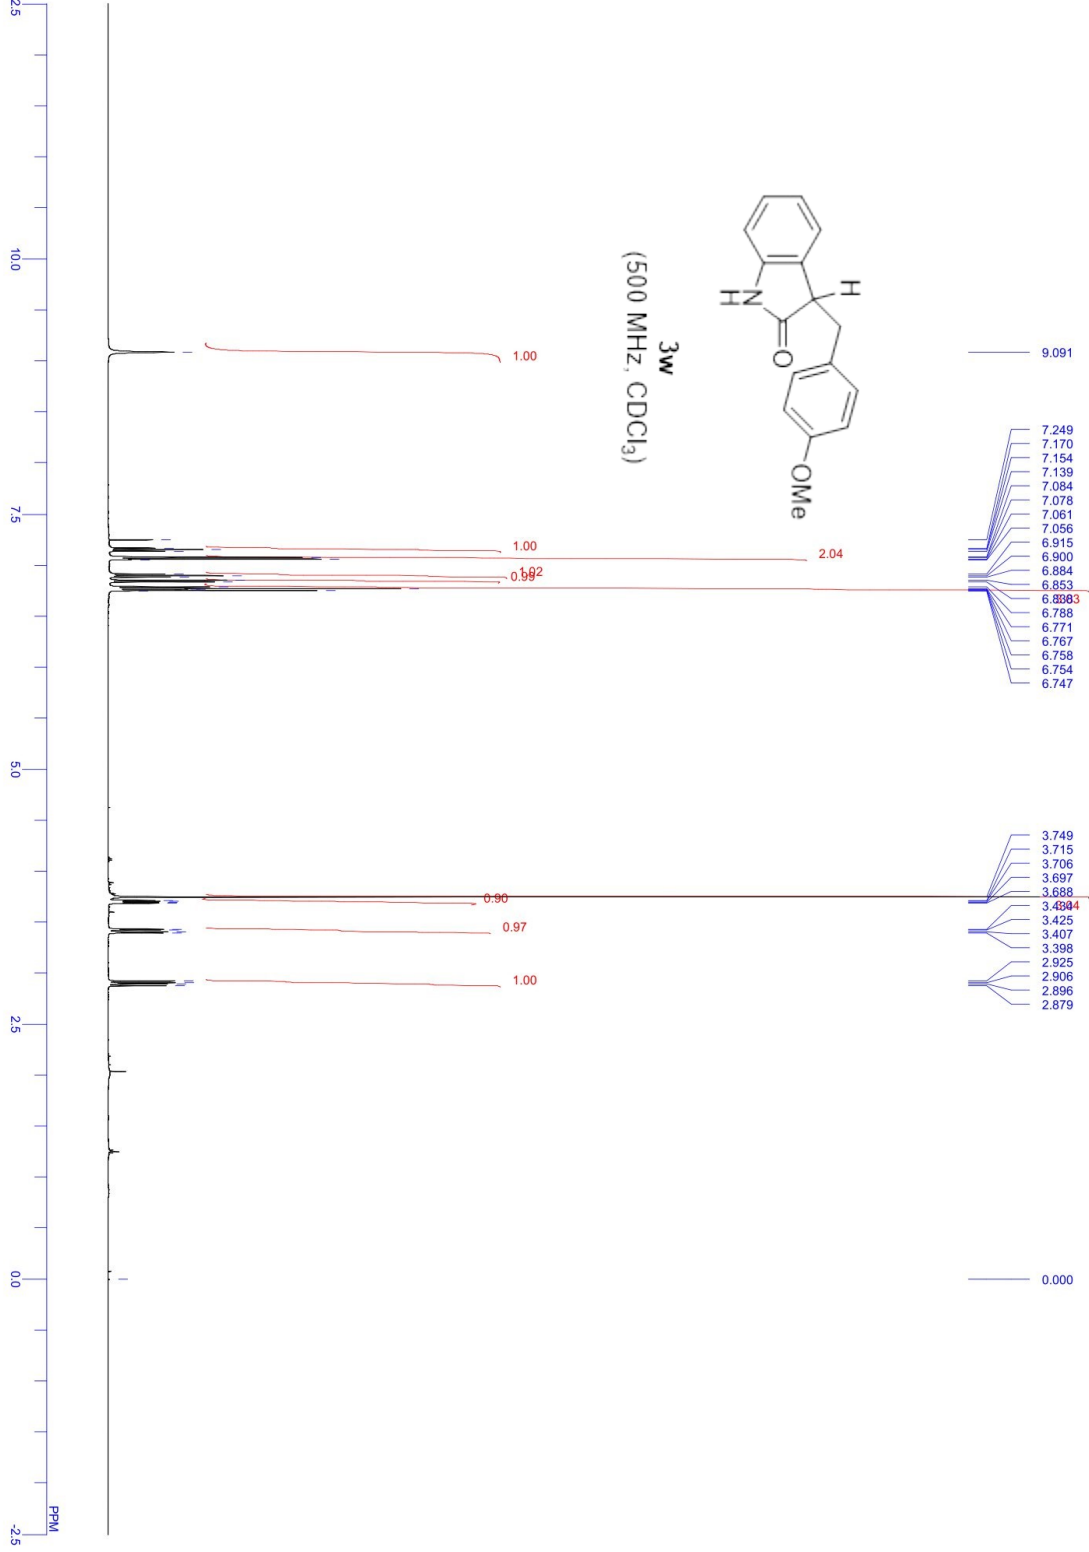

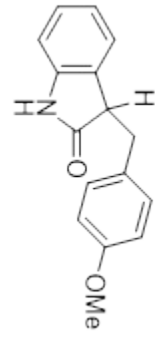

3w  
(125 MHz, CDCl<sub>3</sub>)

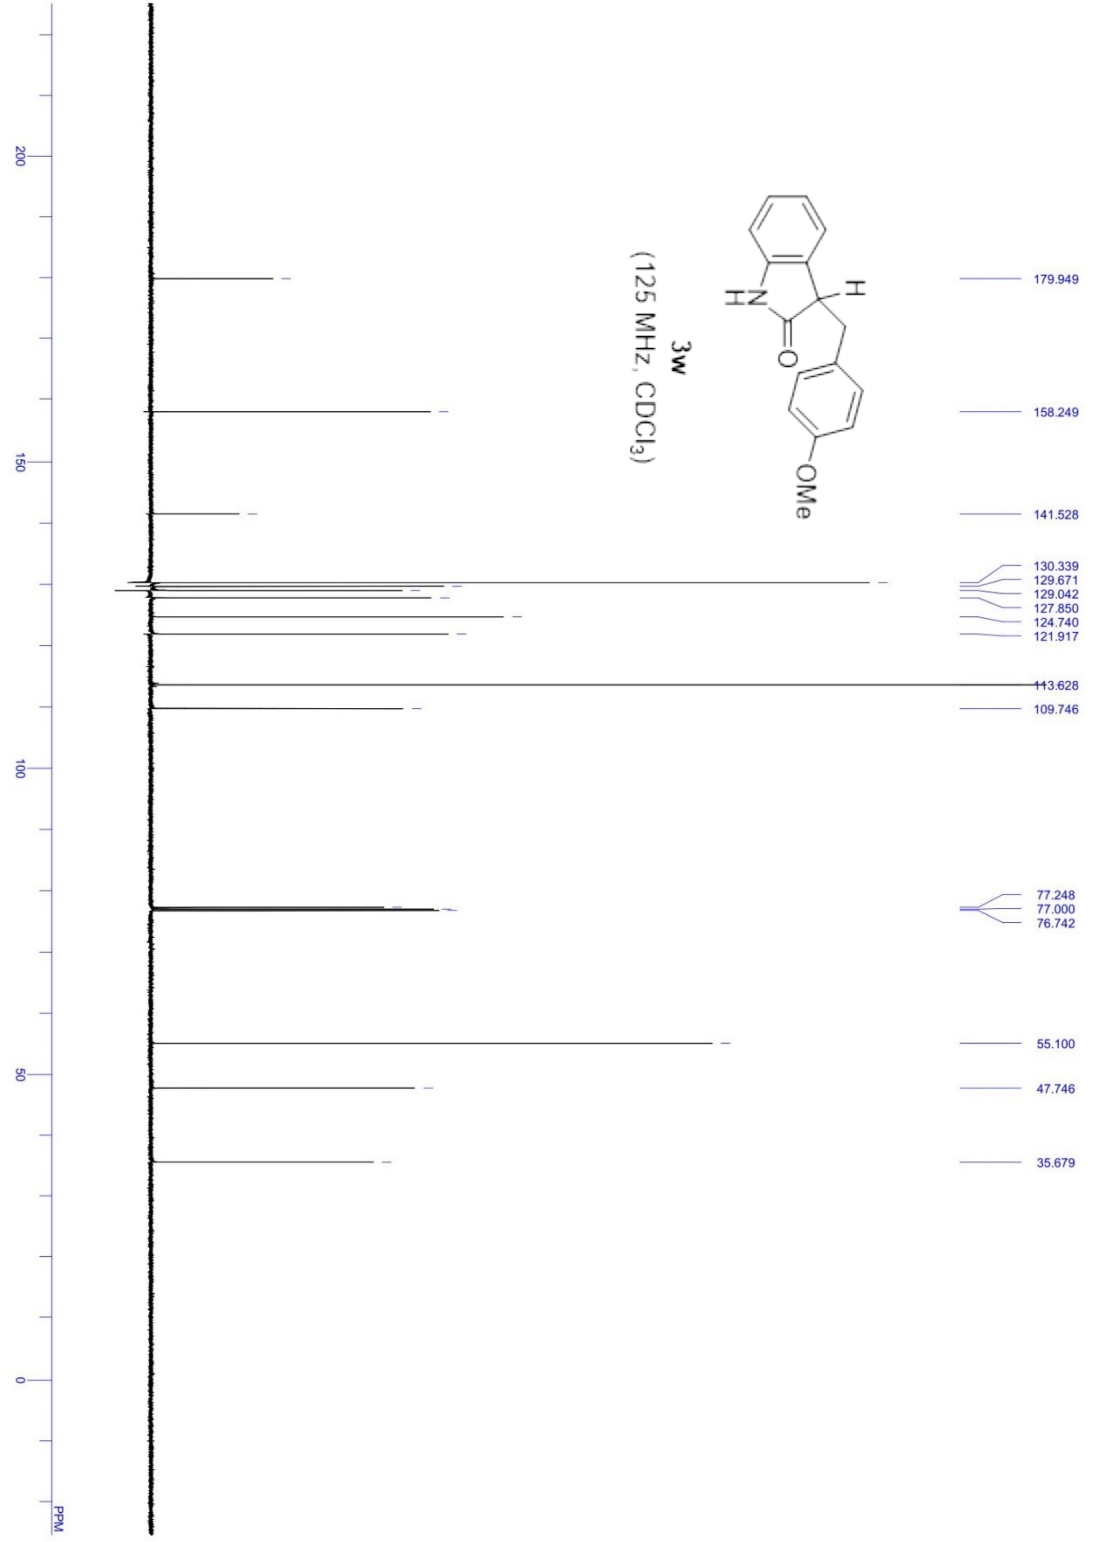

2.5  
10.0  
7.5  
5.0  
2.5  
0.0  
PPM

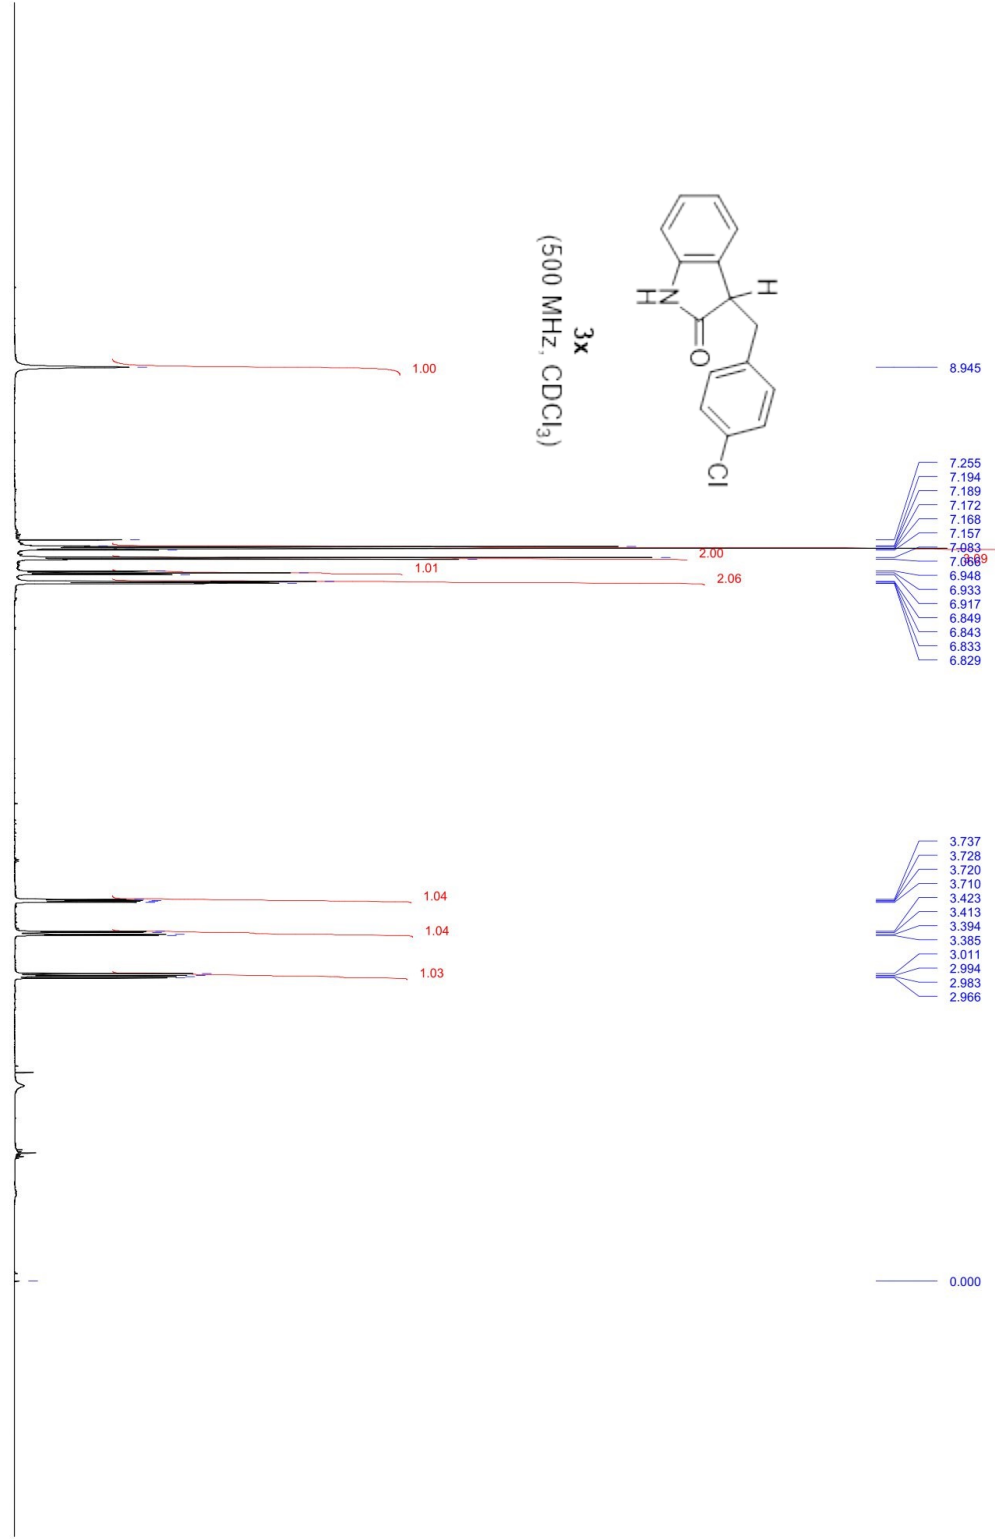

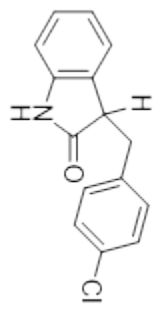

3x  
(125 MHz, CDCl<sub>3</sub>)

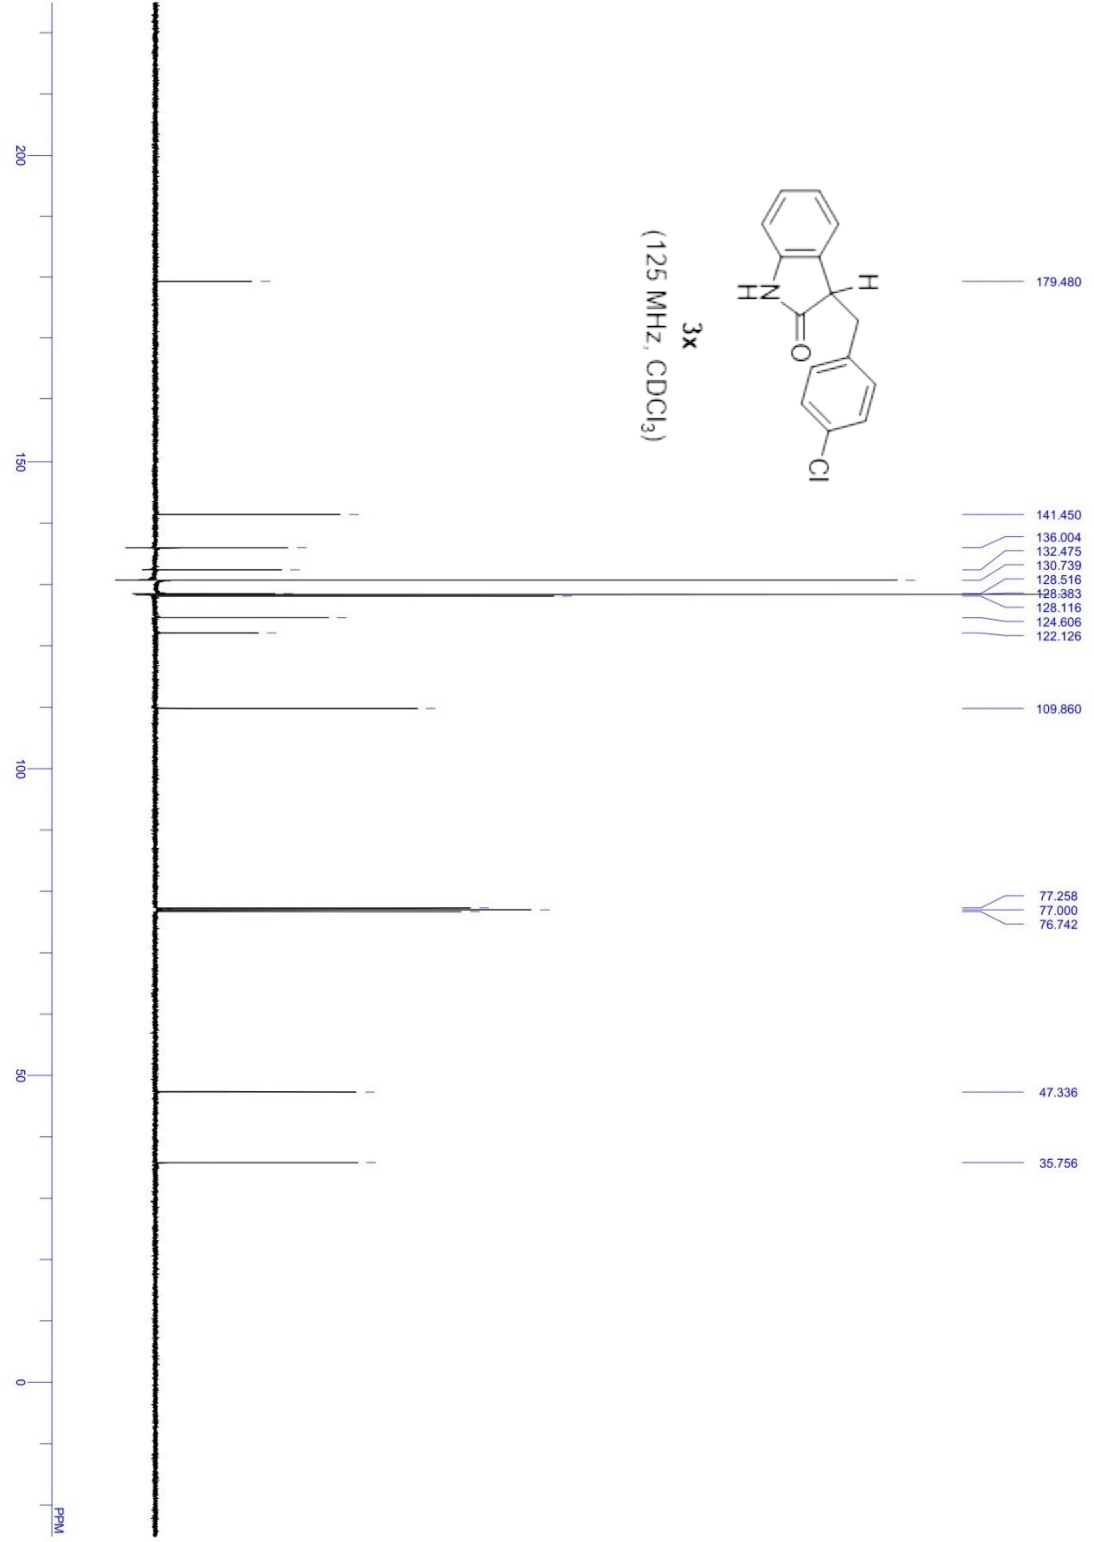

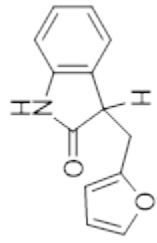

3y  
(500 MHz, CDCl<sub>3</sub>)

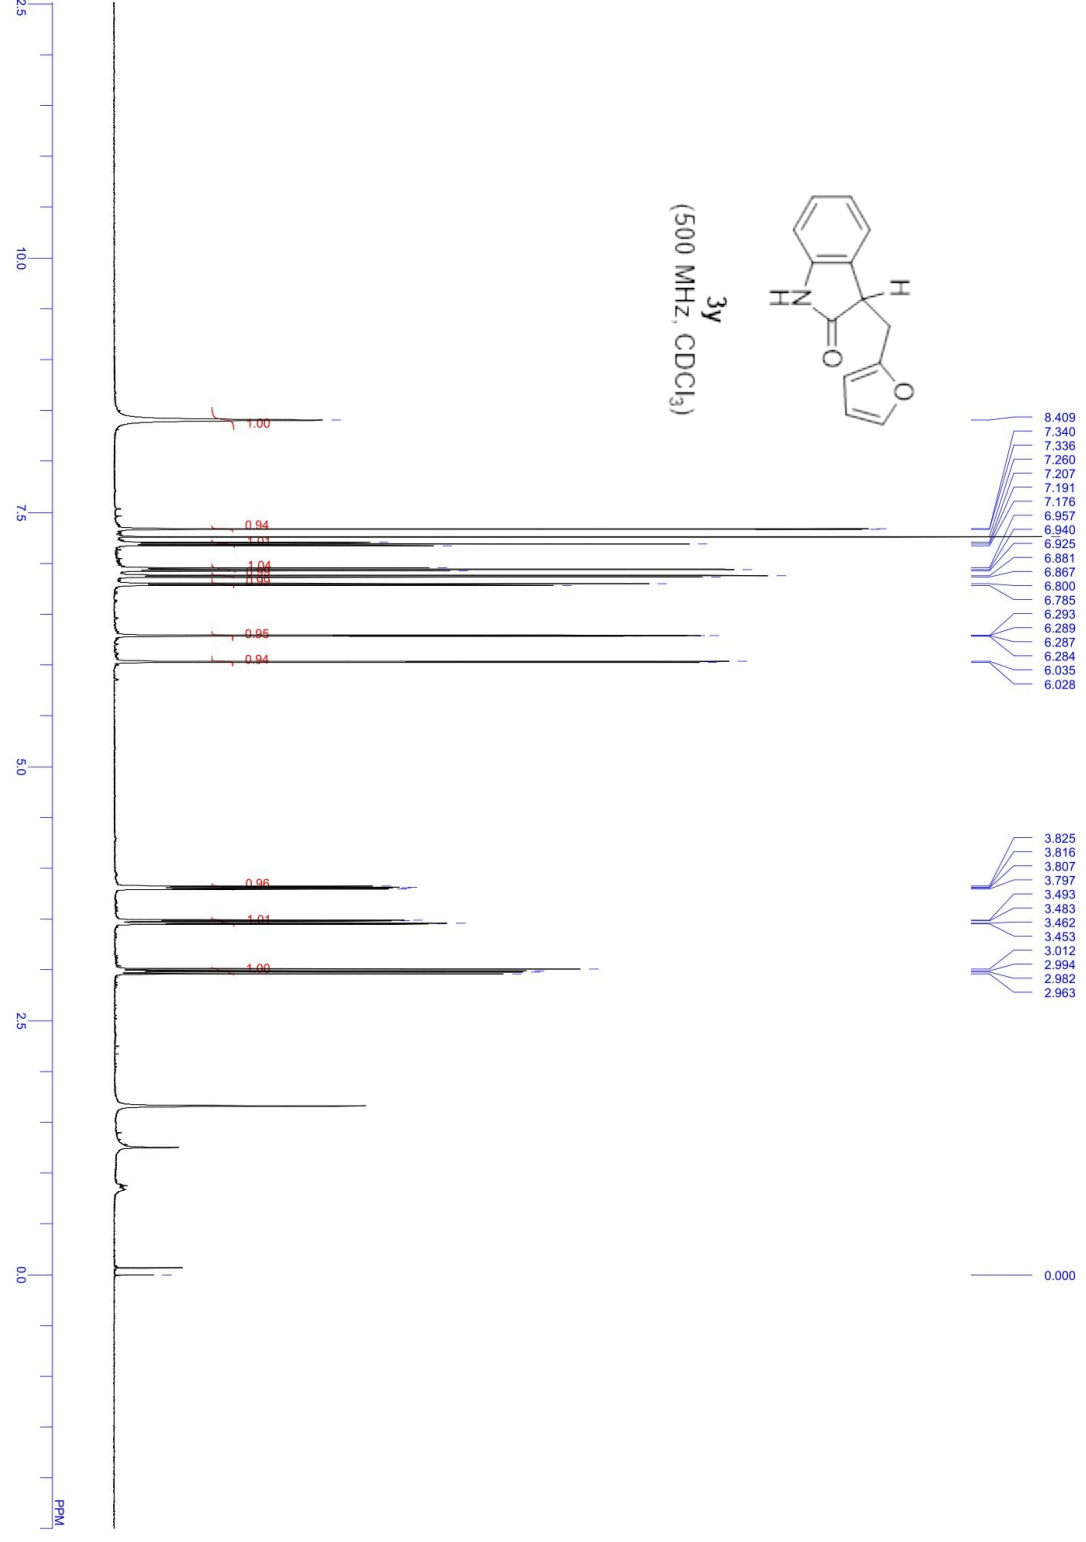

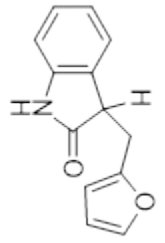

3y

(125 MHz, CDCl<sub>3</sub>)

- 178.993
- 151.876
- 141.536
- 141.222
- 128.717
- 128.068
- 124.711
- 122.269
- 110.336
- 109.592
- 107.294
- 77.258
- 77.000
- 76.742
- 45.056
- 29.041

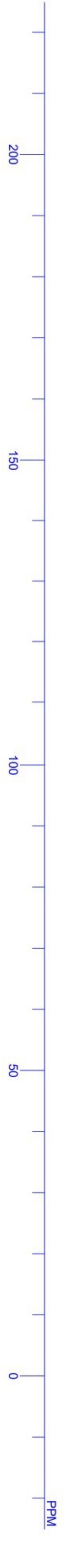



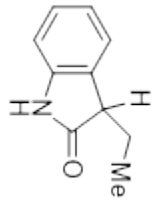

3z  
(500 MHz, CDCl<sub>3</sub>)

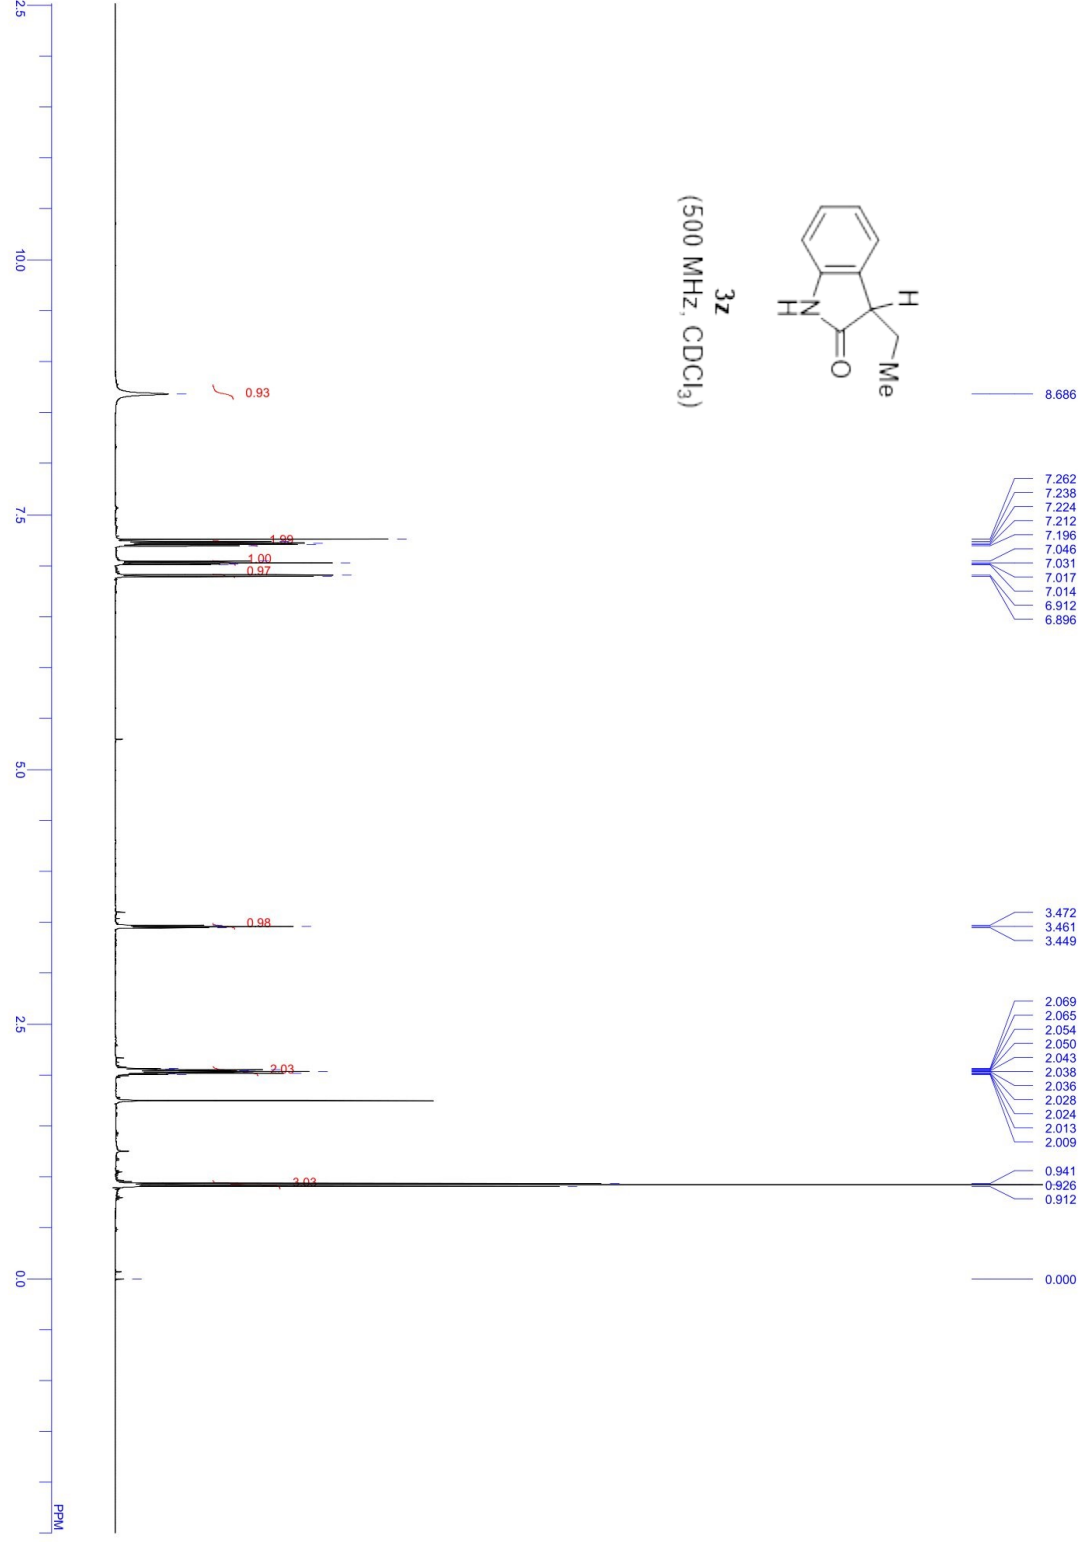

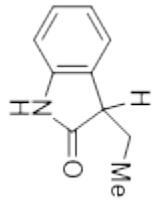

3z  
(125 MHz, CDCl<sub>3</sub>)

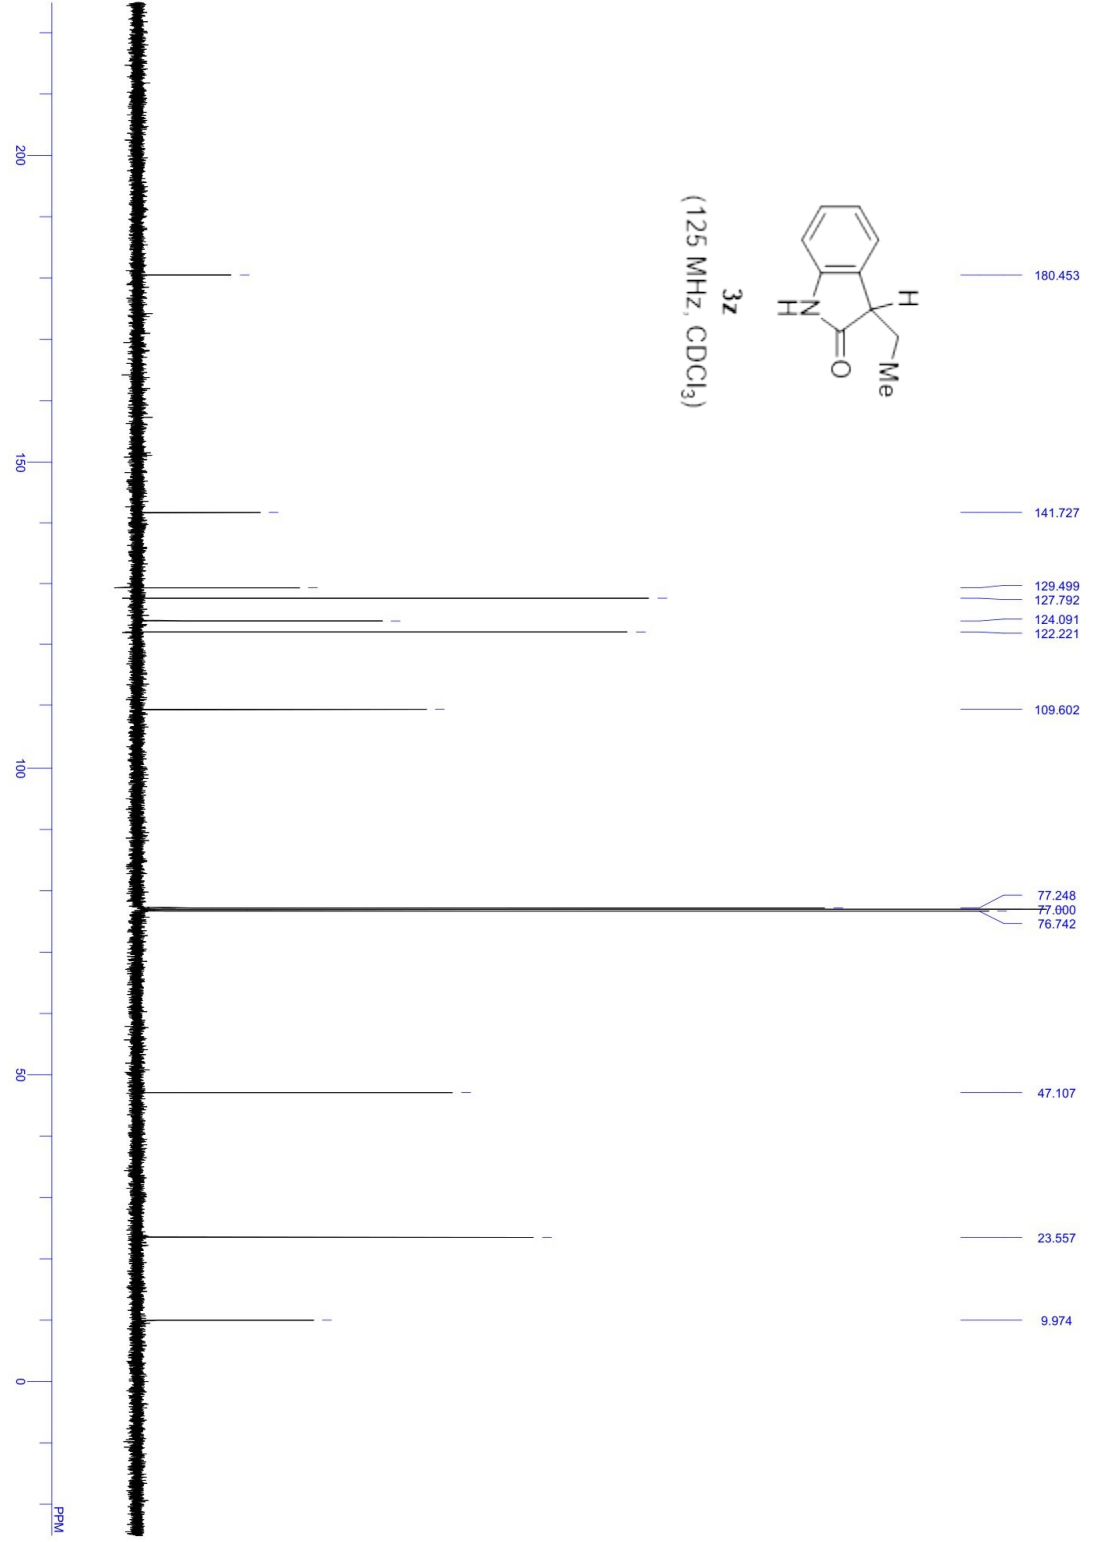

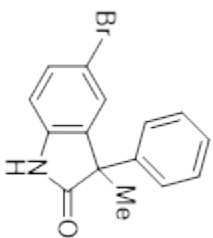

3aa  
(500 MHz, CDCl<sub>3</sub>)

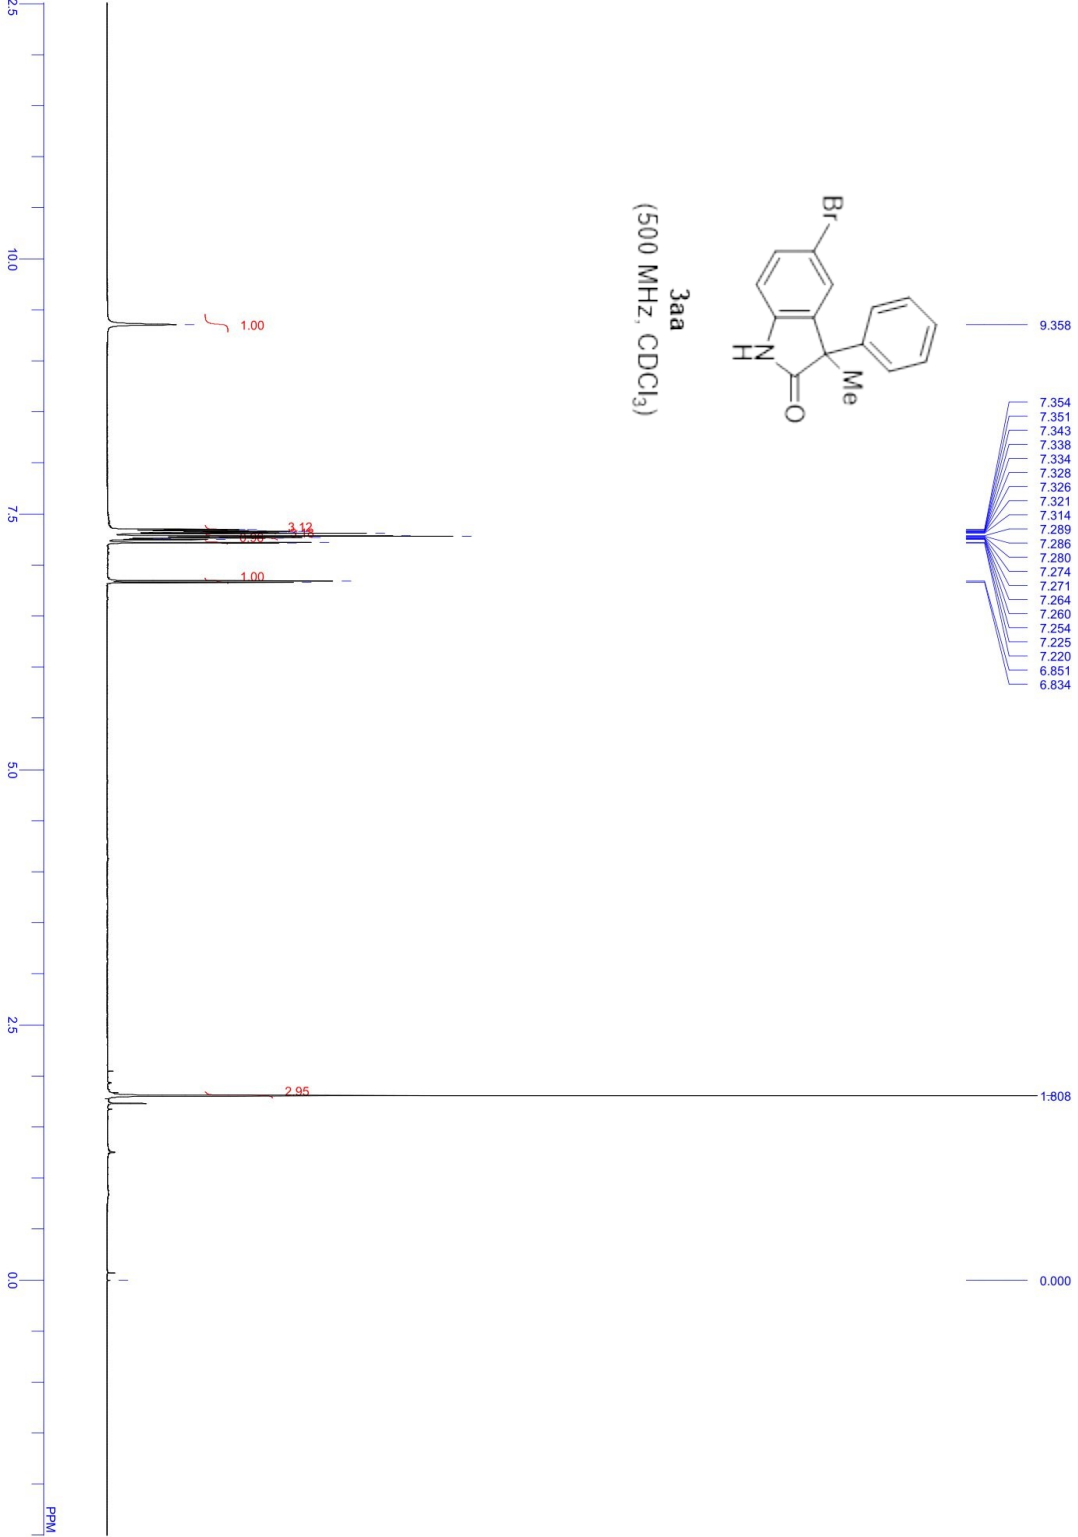

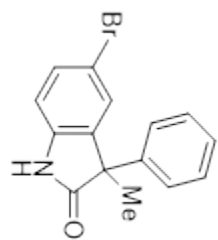

3aa  
(125 MHz, CDCl<sub>3</sub>)

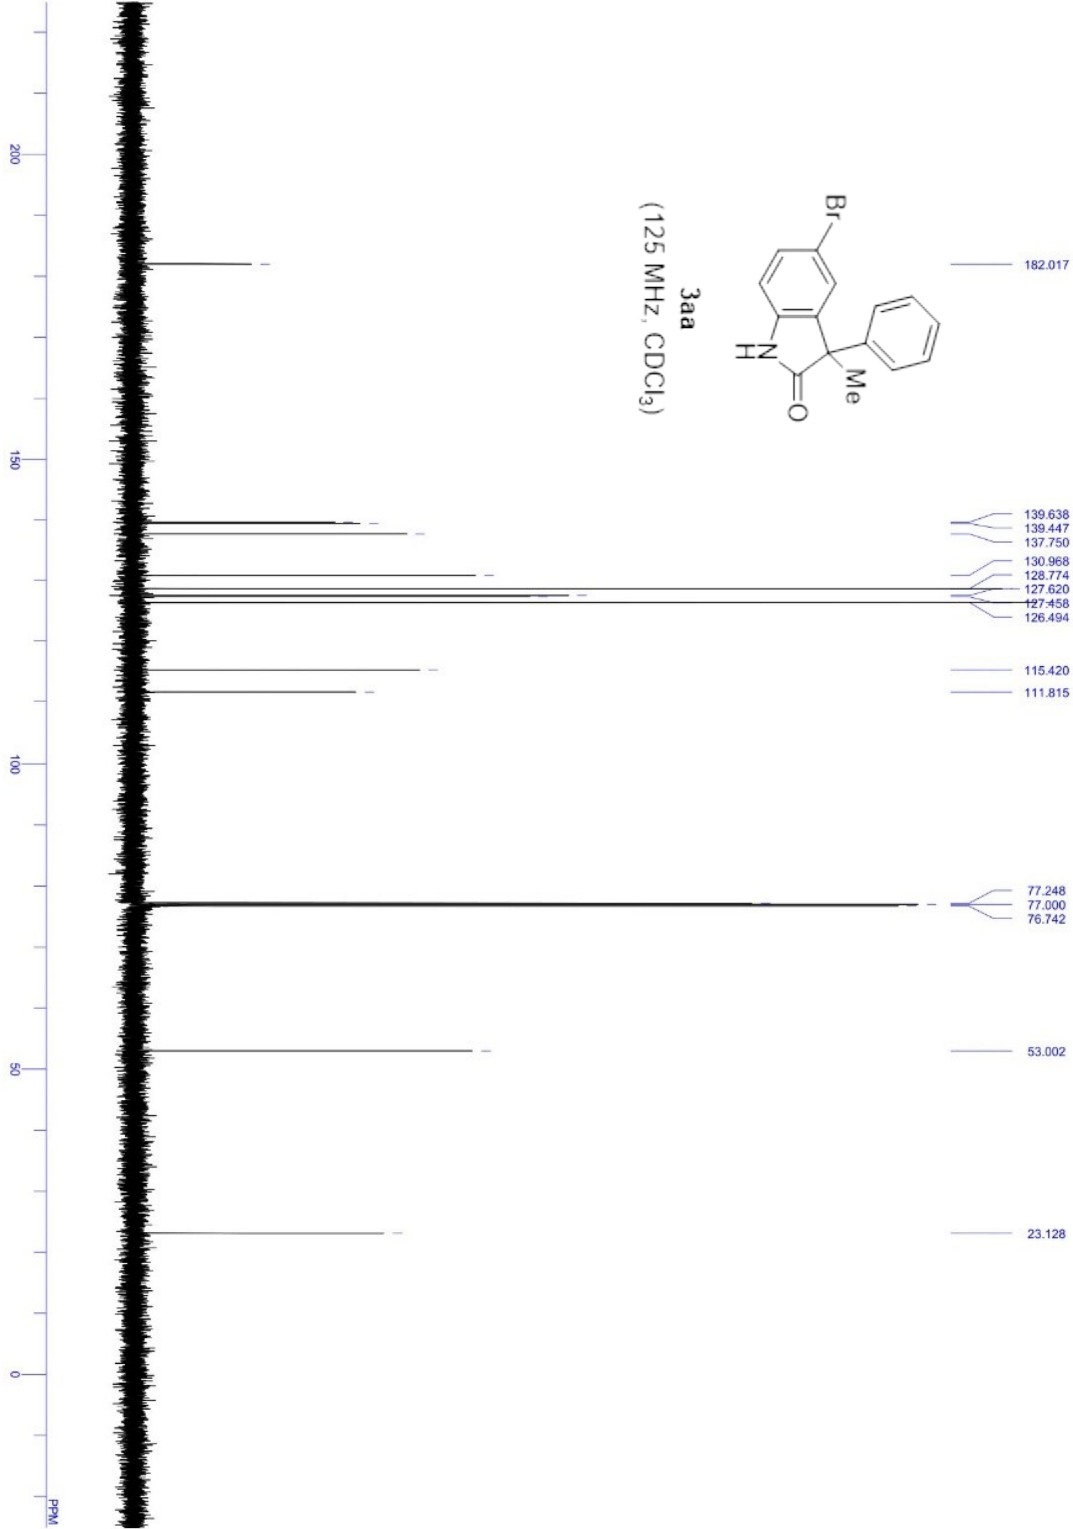

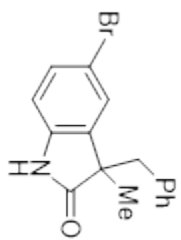

3alb  
(500 MHz, CDCl<sub>3</sub>)

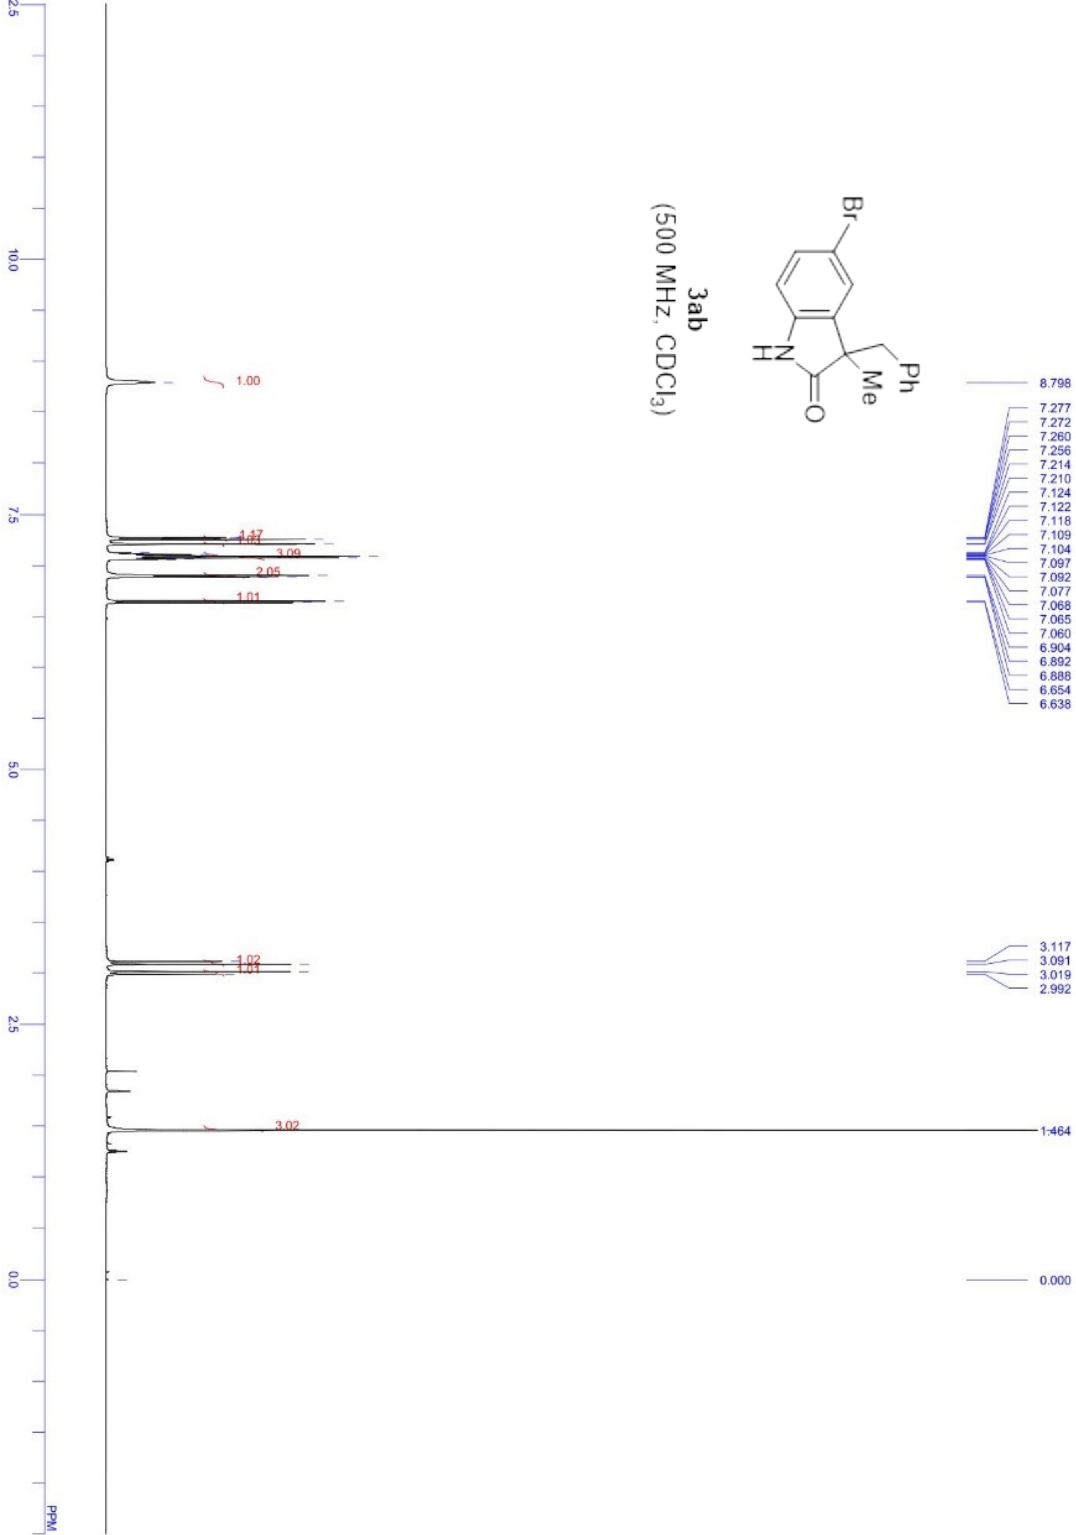

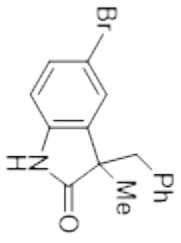

3ab  
(125 MHz, CDCl<sub>3</sub>)

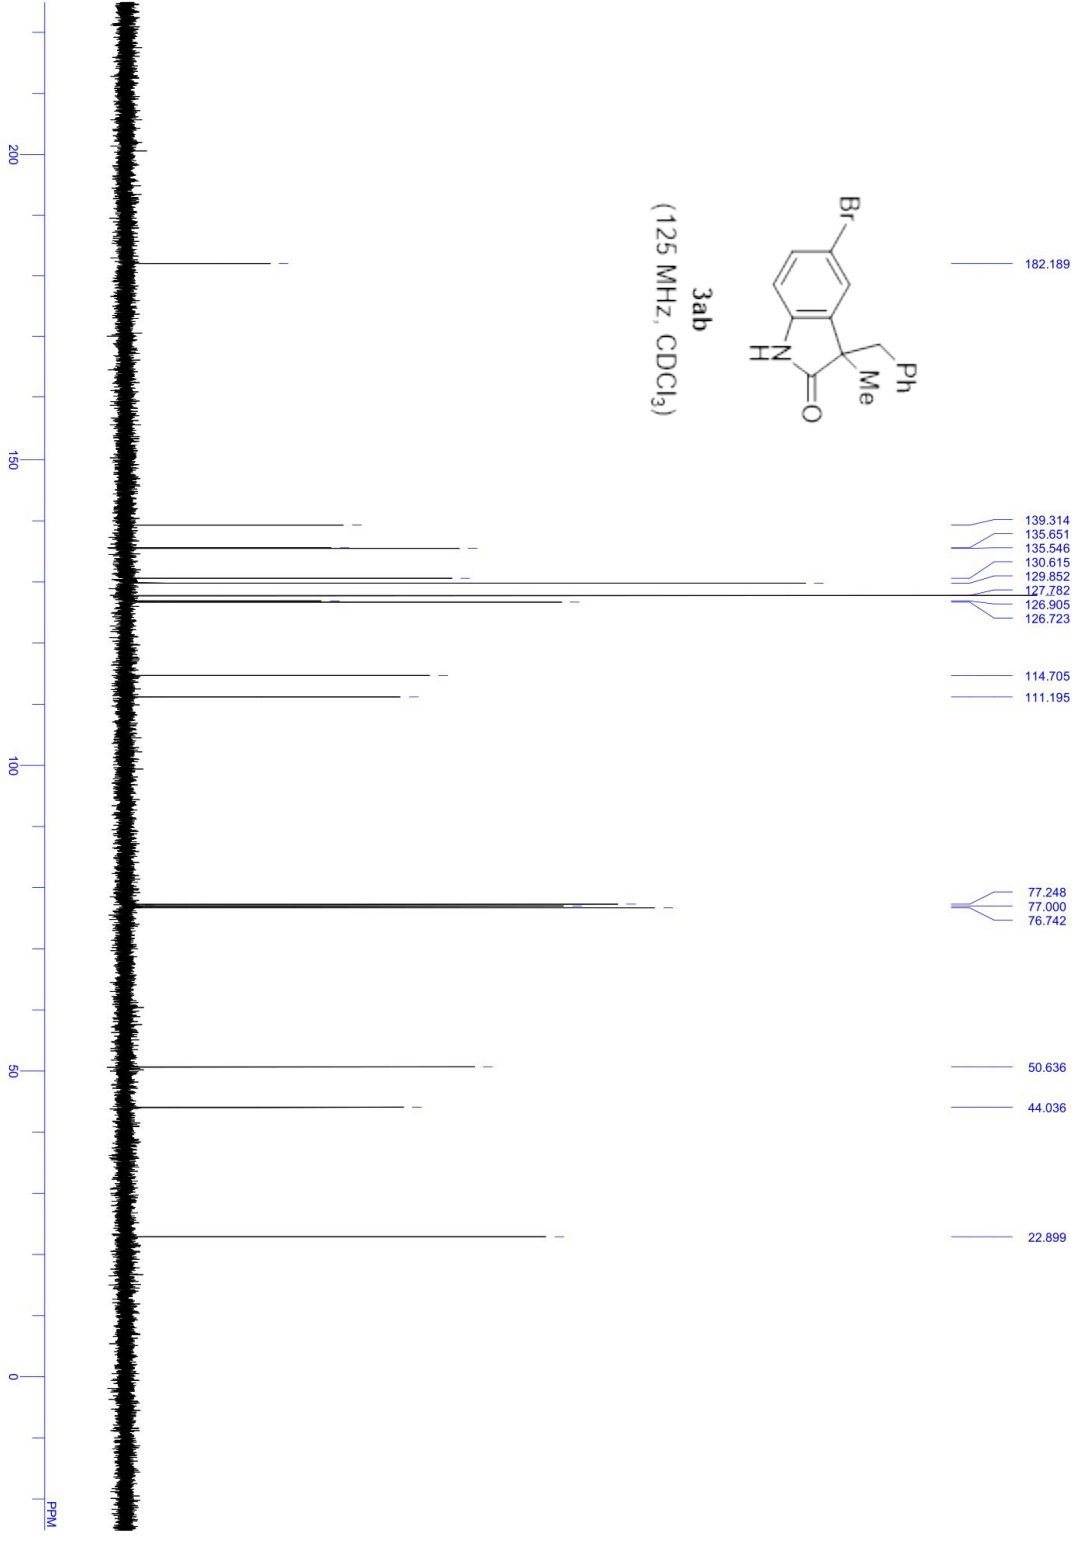

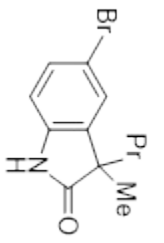

3ac  
(500 MHz, CDCl<sub>3</sub>)

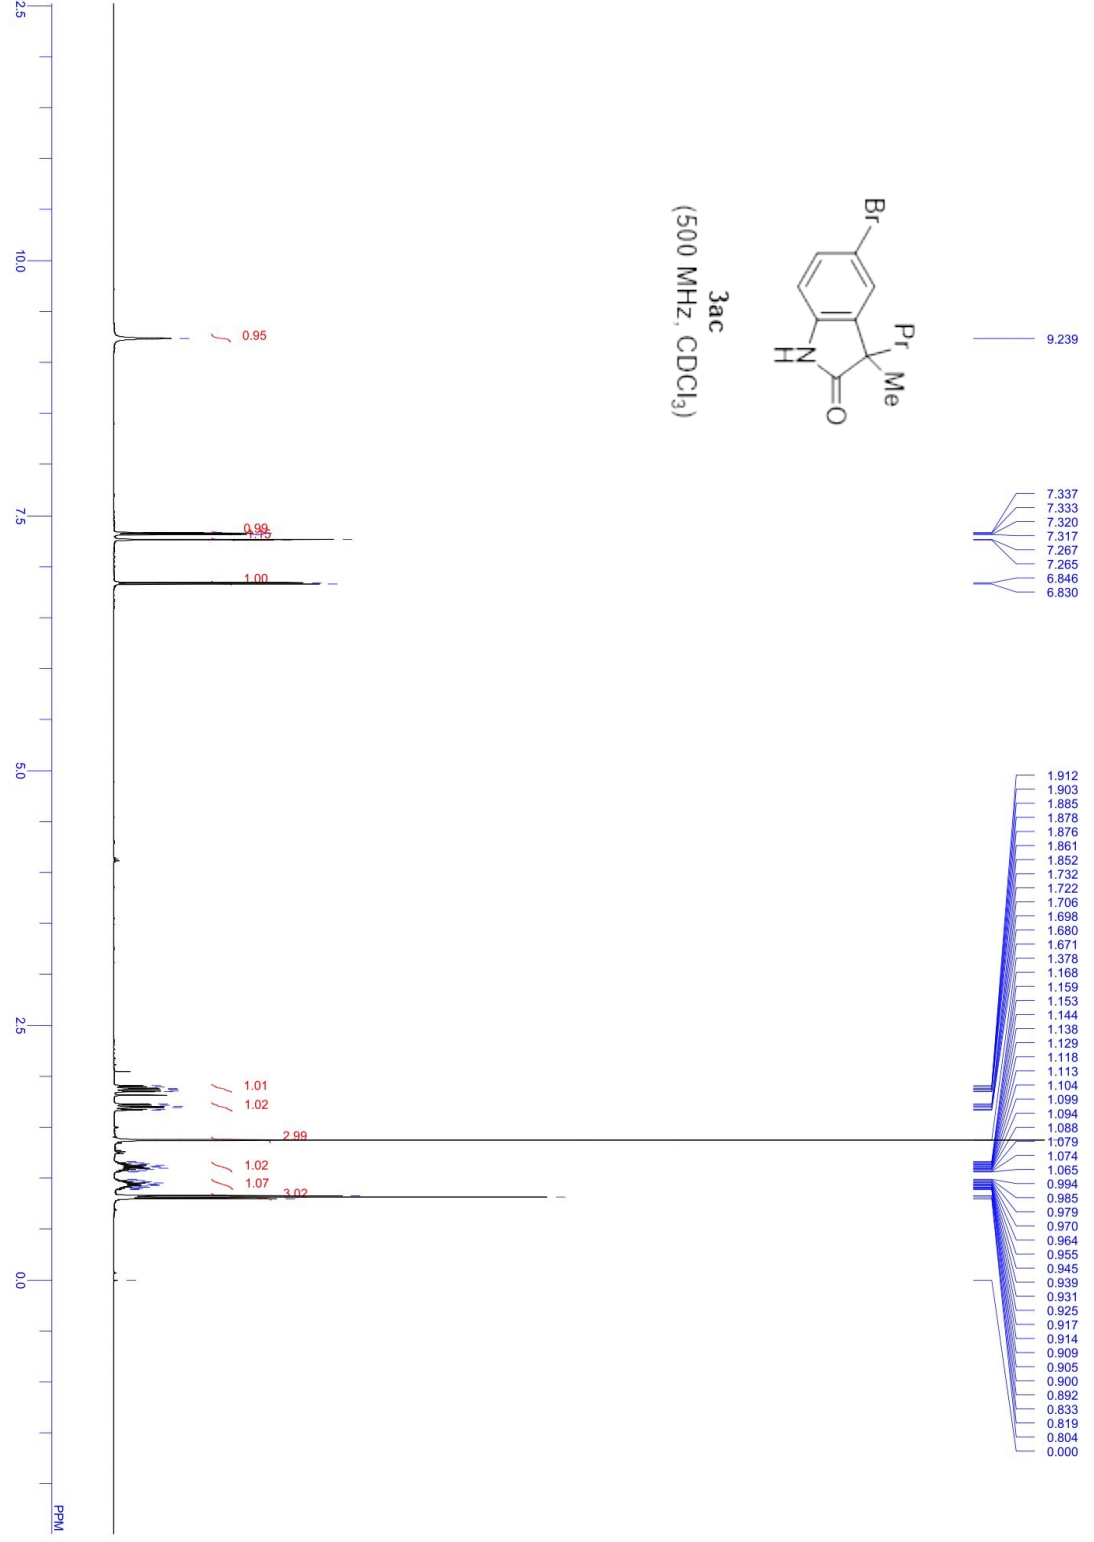

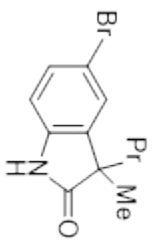

3ac  
(125 MHz, CDCl<sub>3</sub>)

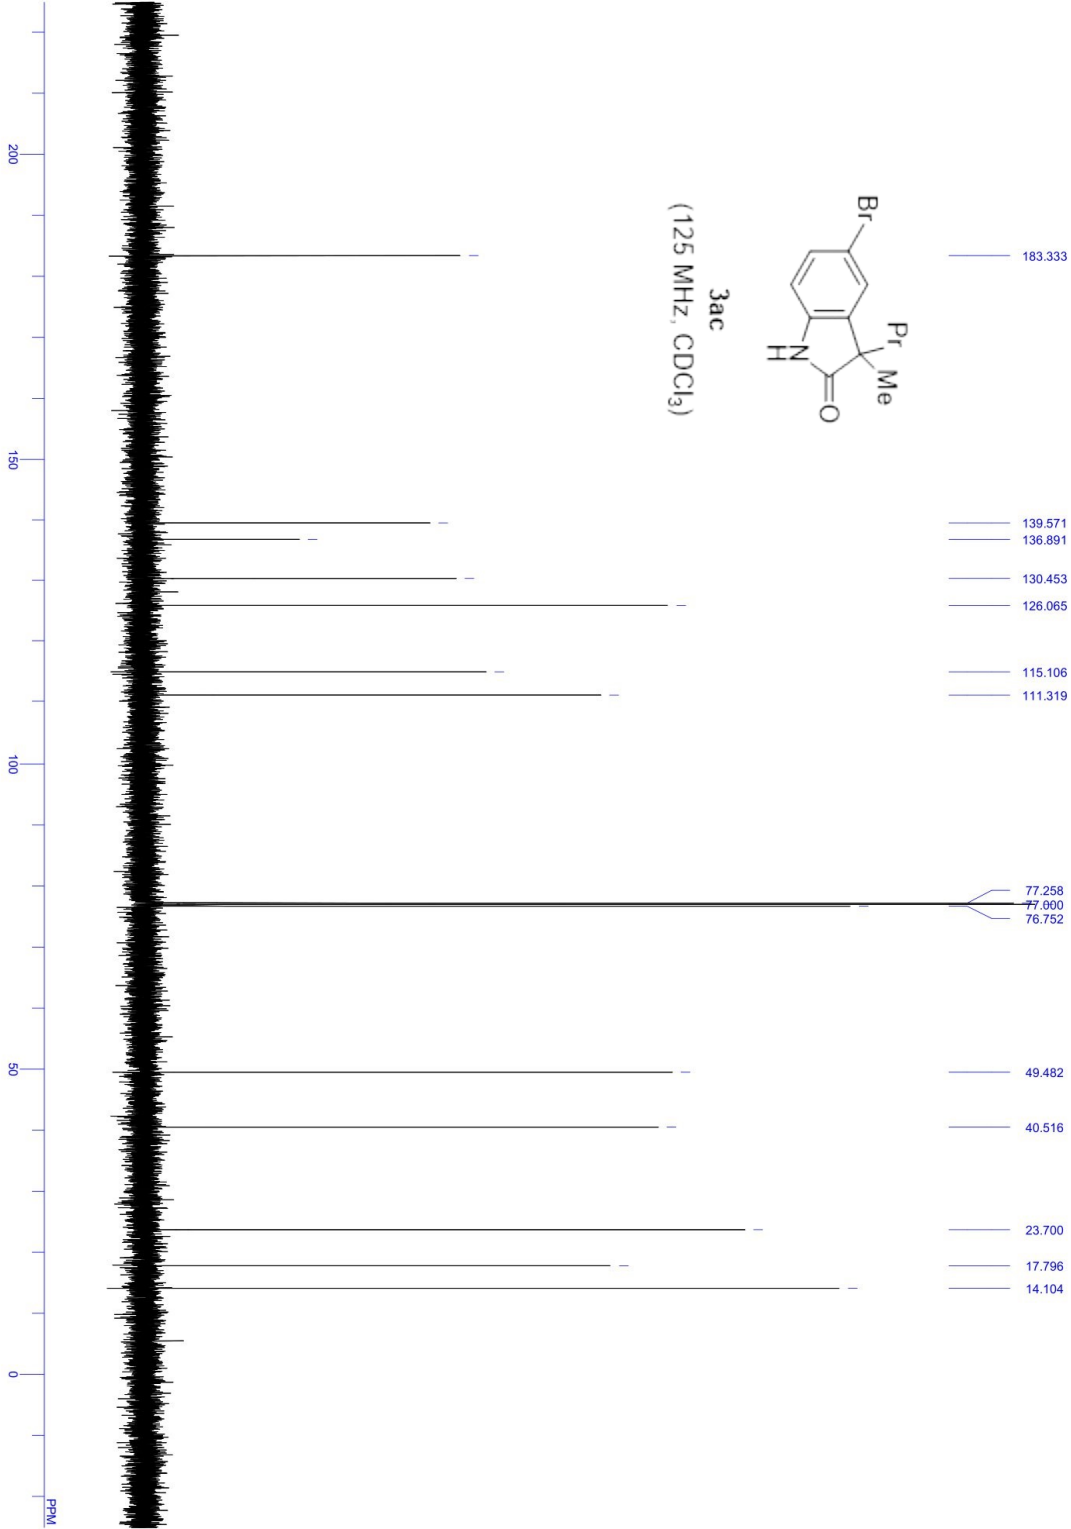



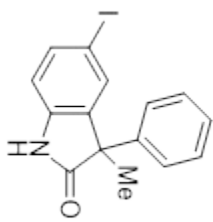

3ad  
(500 MHz, DMSO-d<sub>6</sub>)

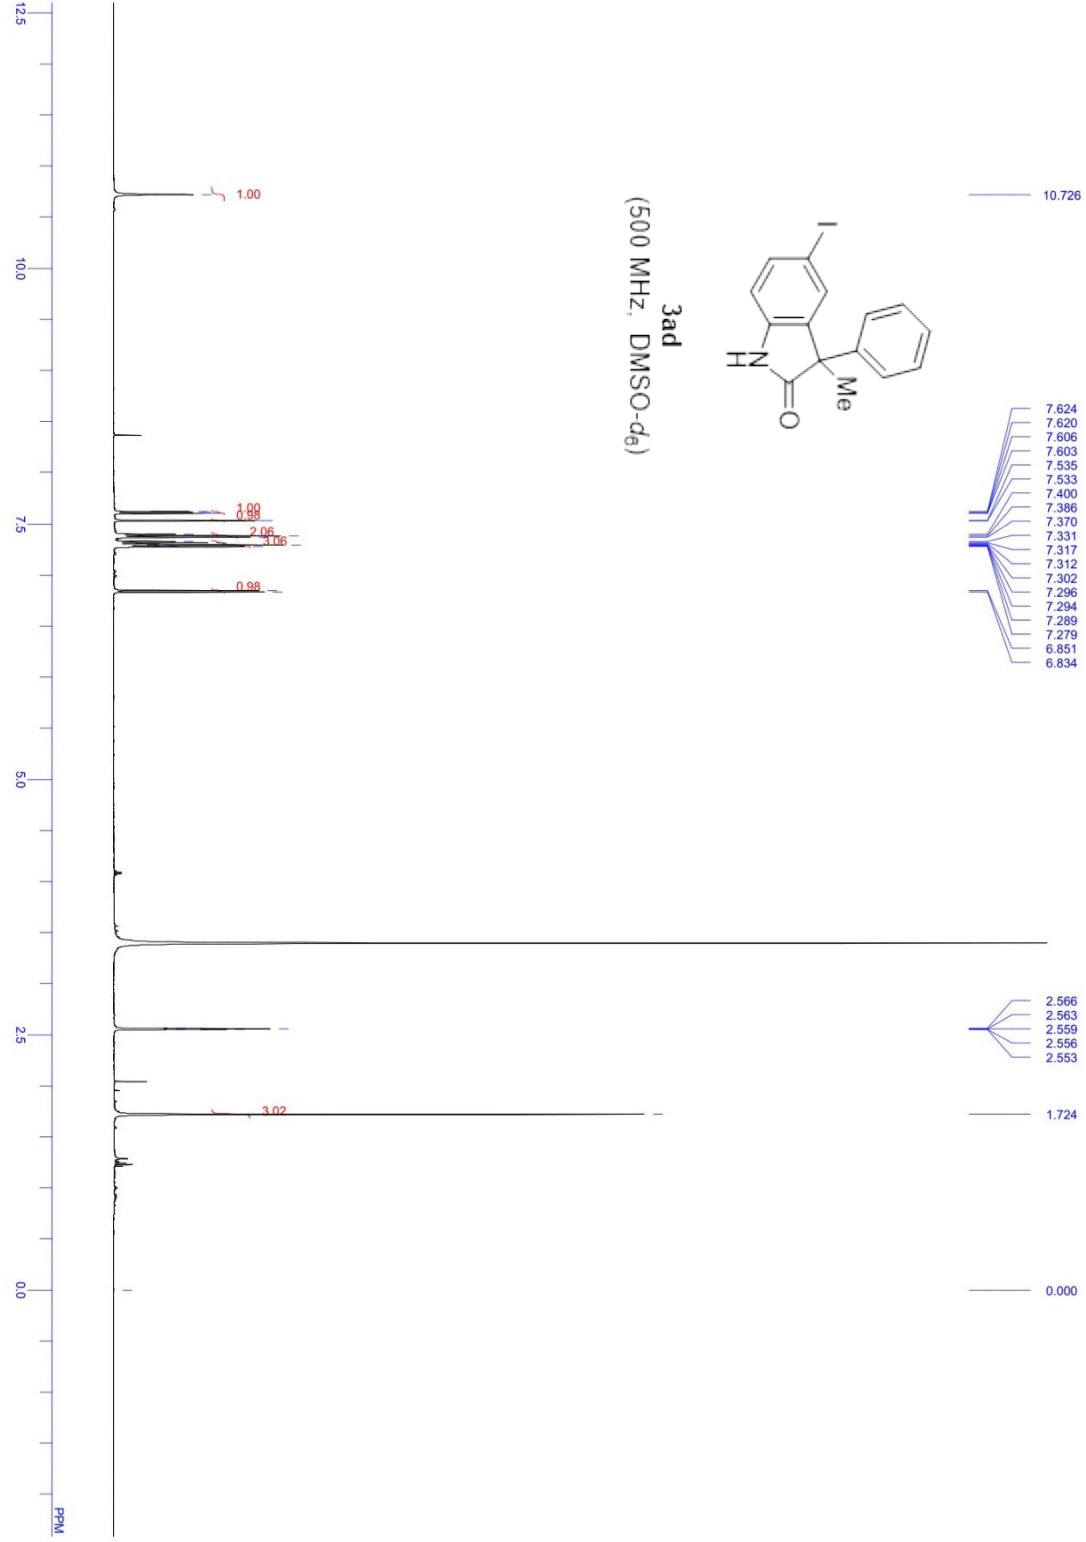

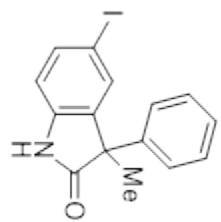

**3ad**  
(125 MHz, DMSO-d<sub>6</sub>)

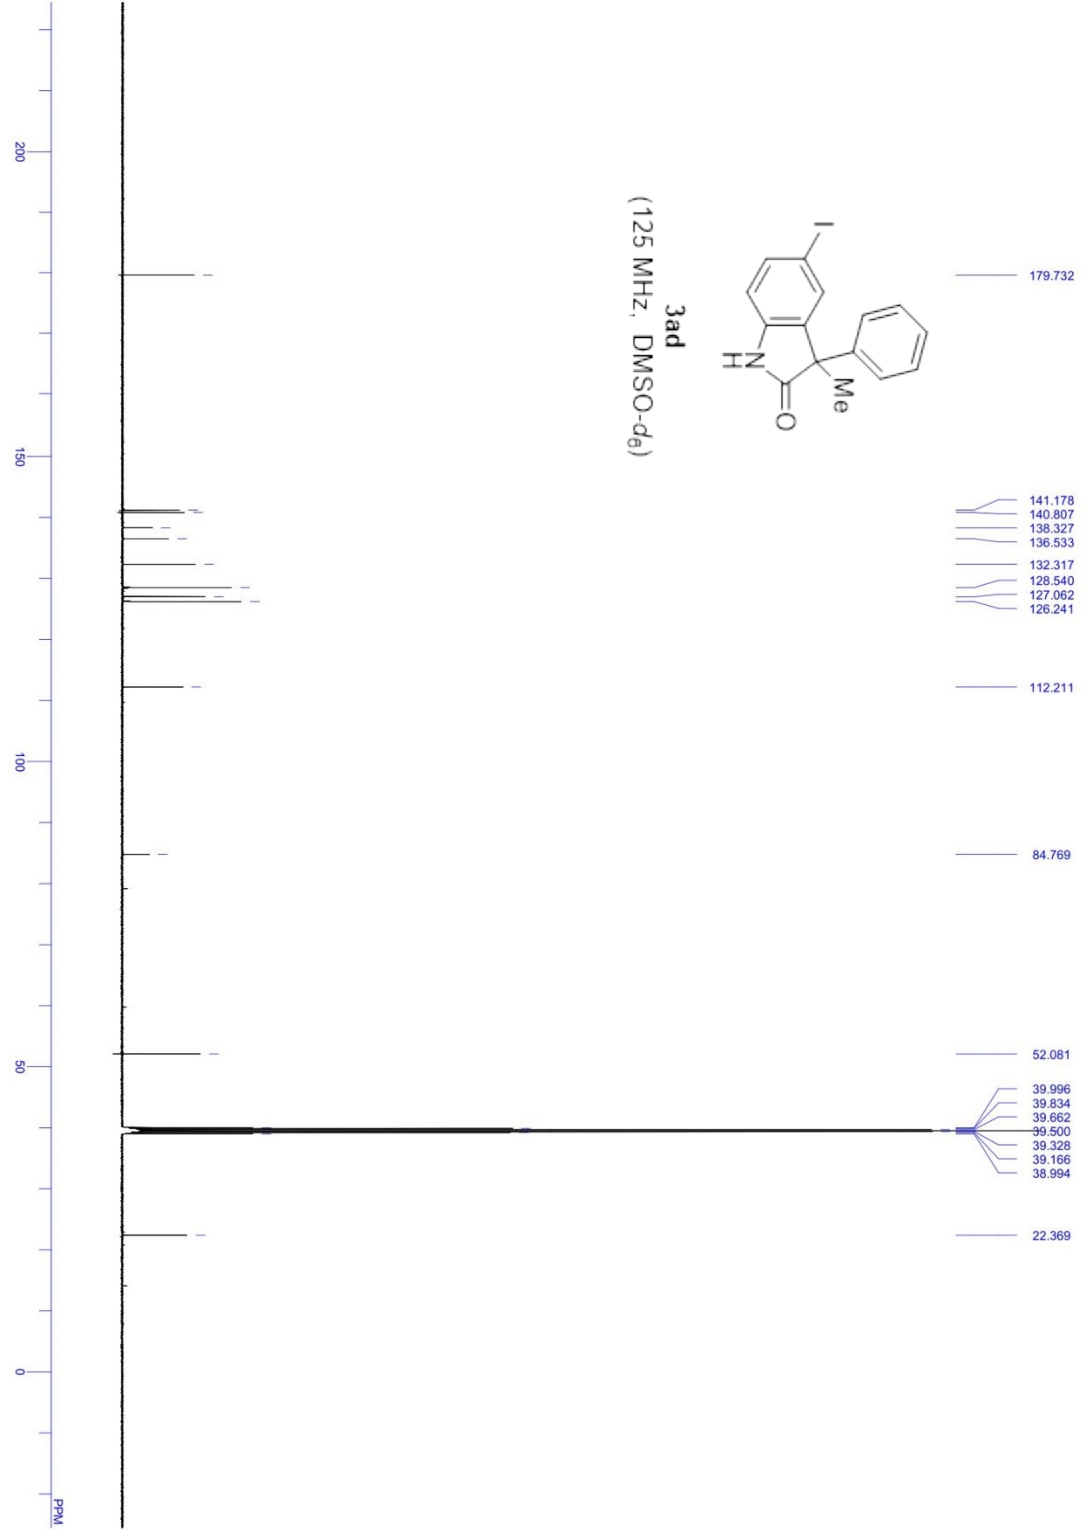

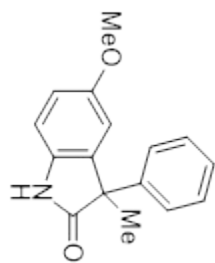

3ae  
(500 MHz, CDCl<sub>3</sub>)

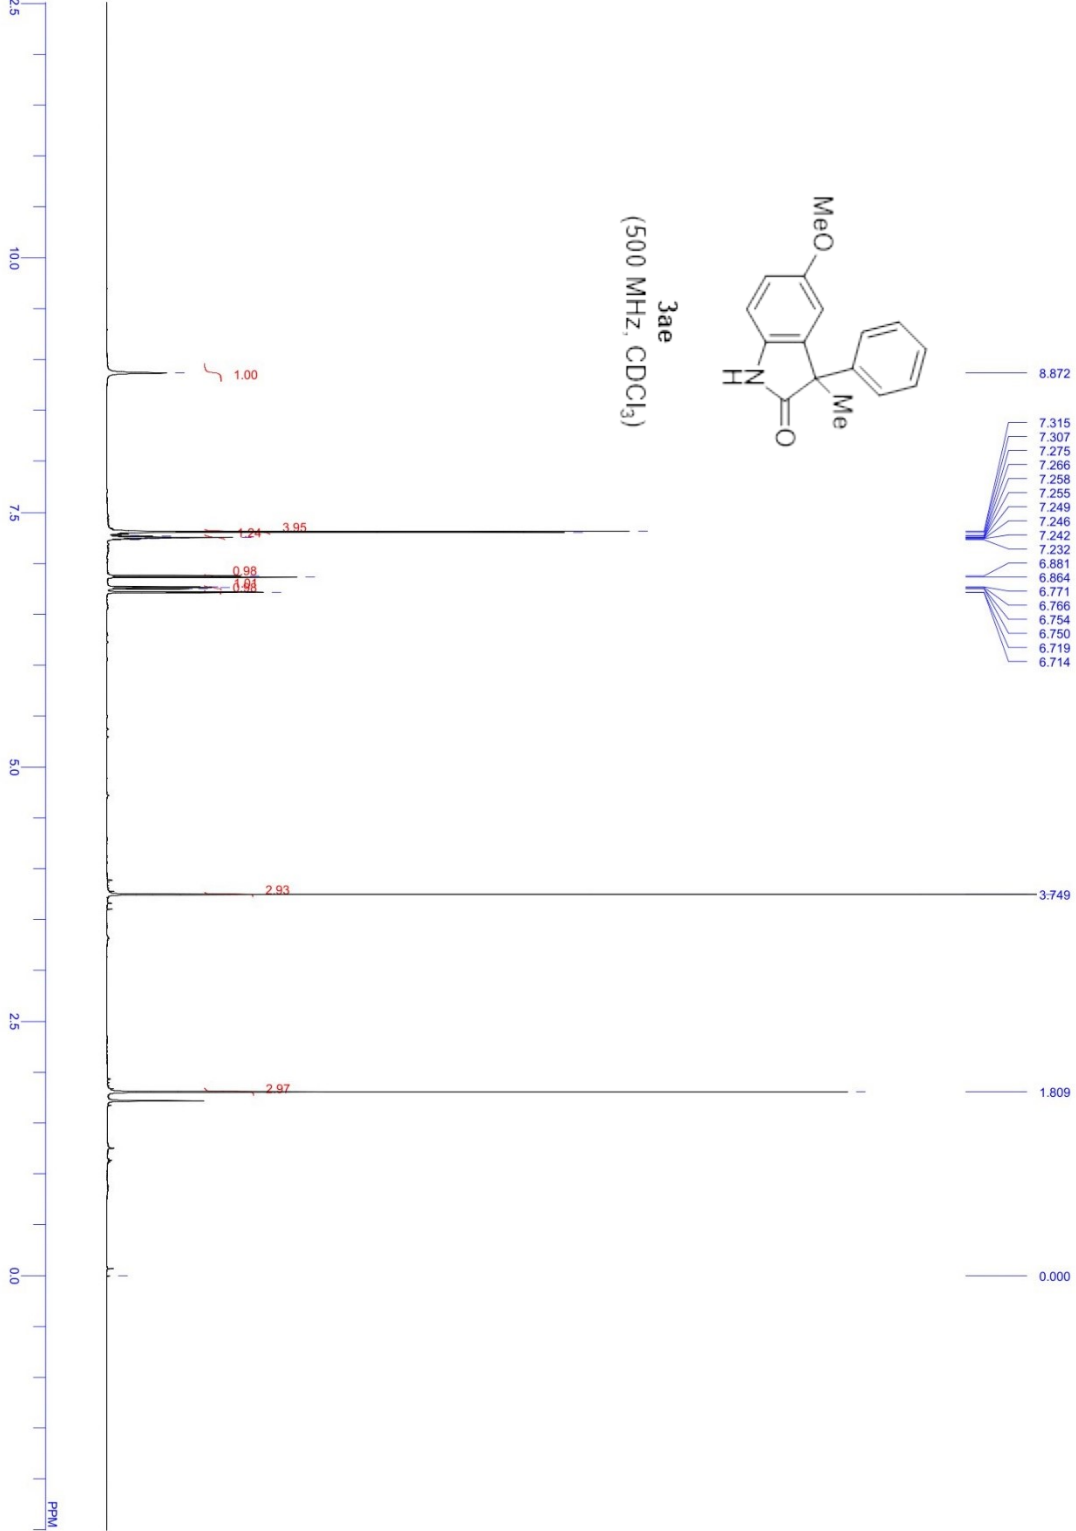

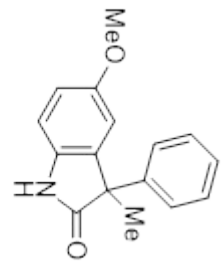

3ae  
(125 MHz, CDCl<sub>3</sub>)

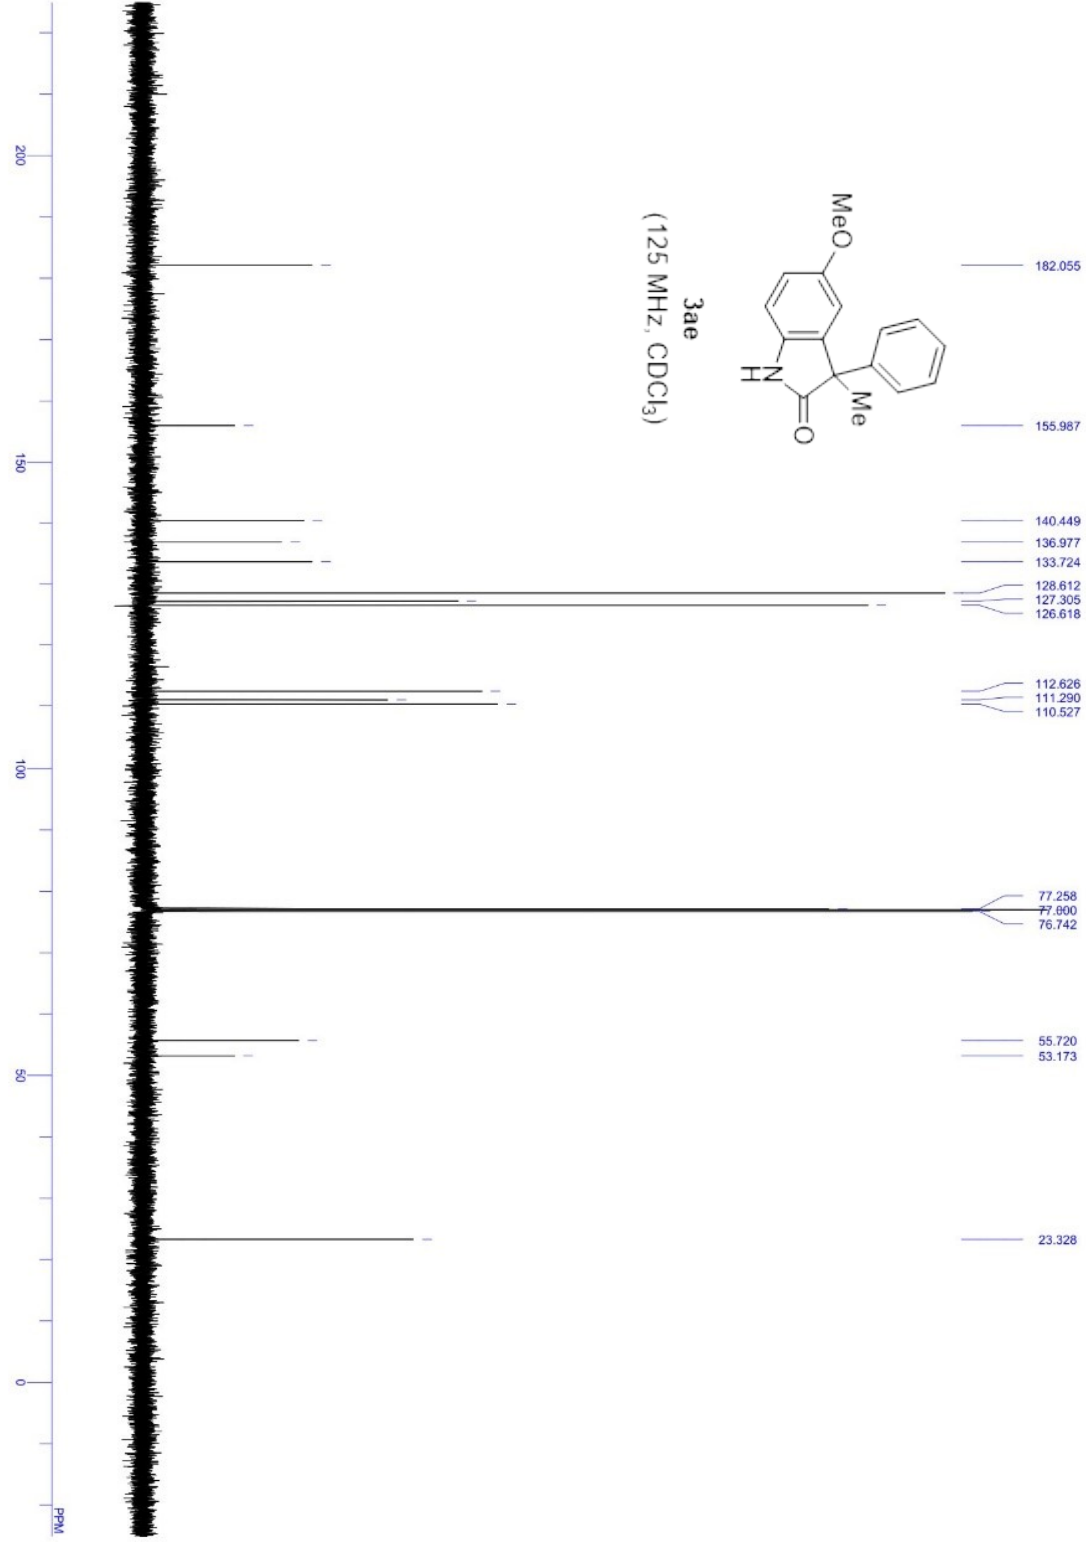

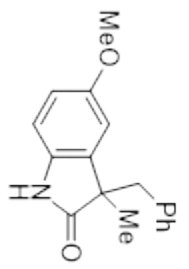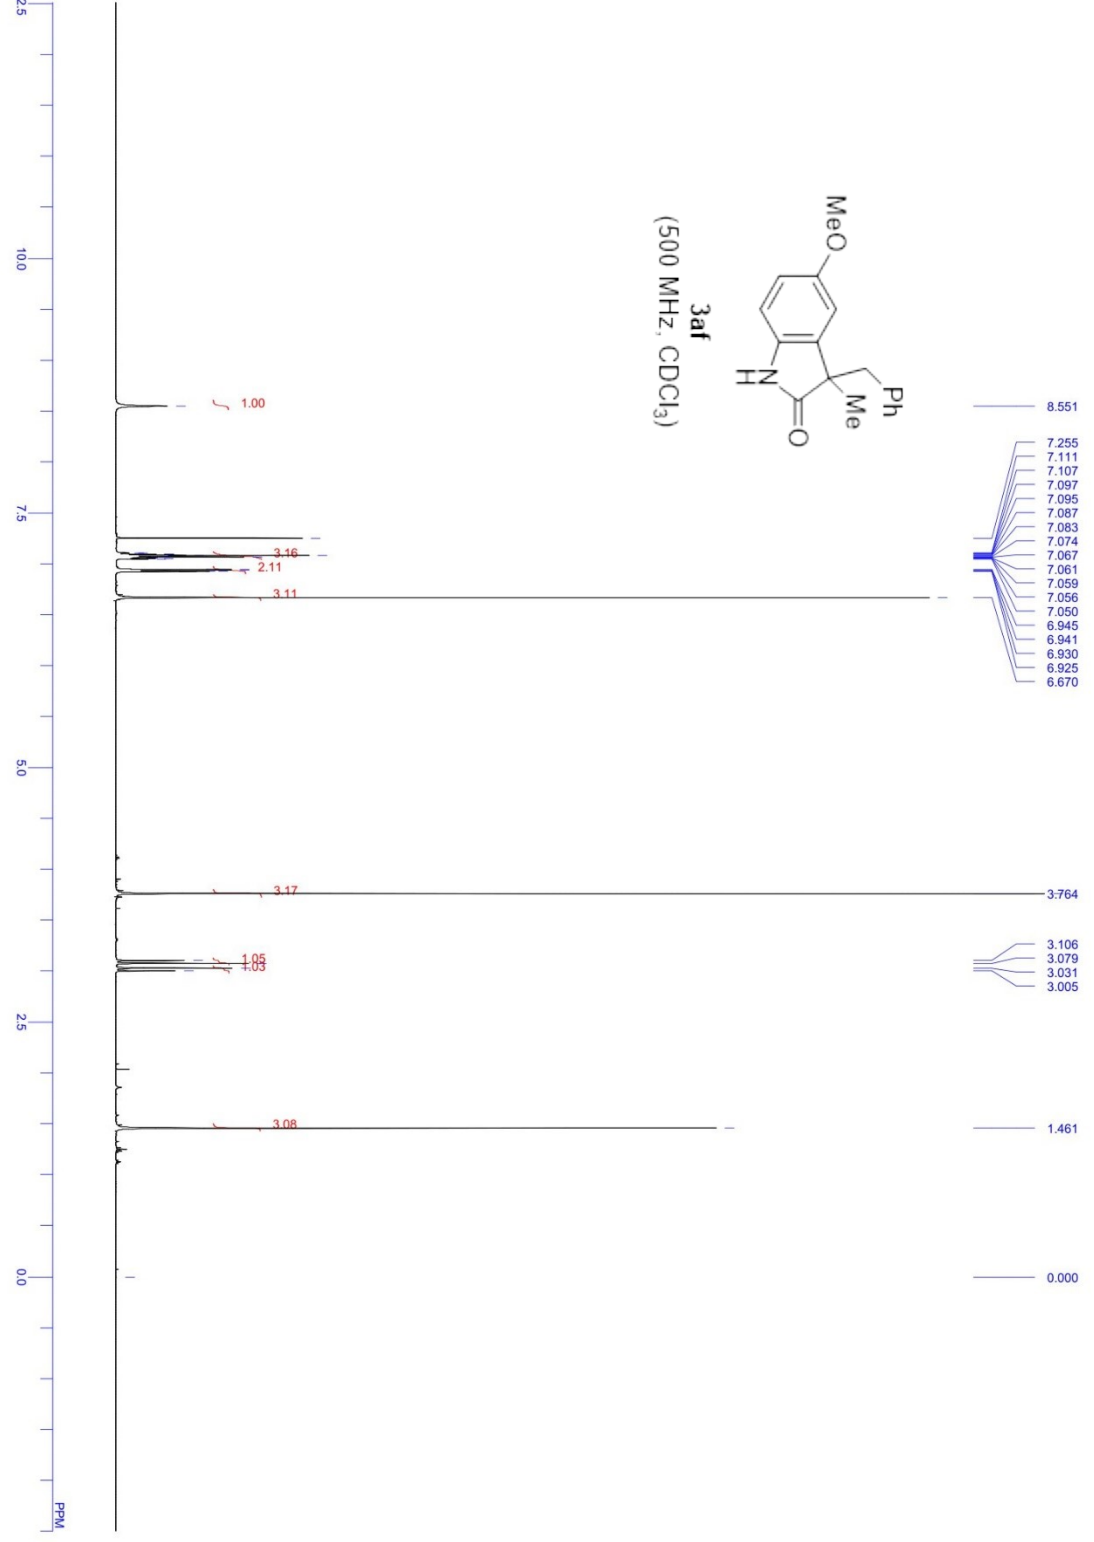



(125 MHz, CDCl<sub>3</sub>)

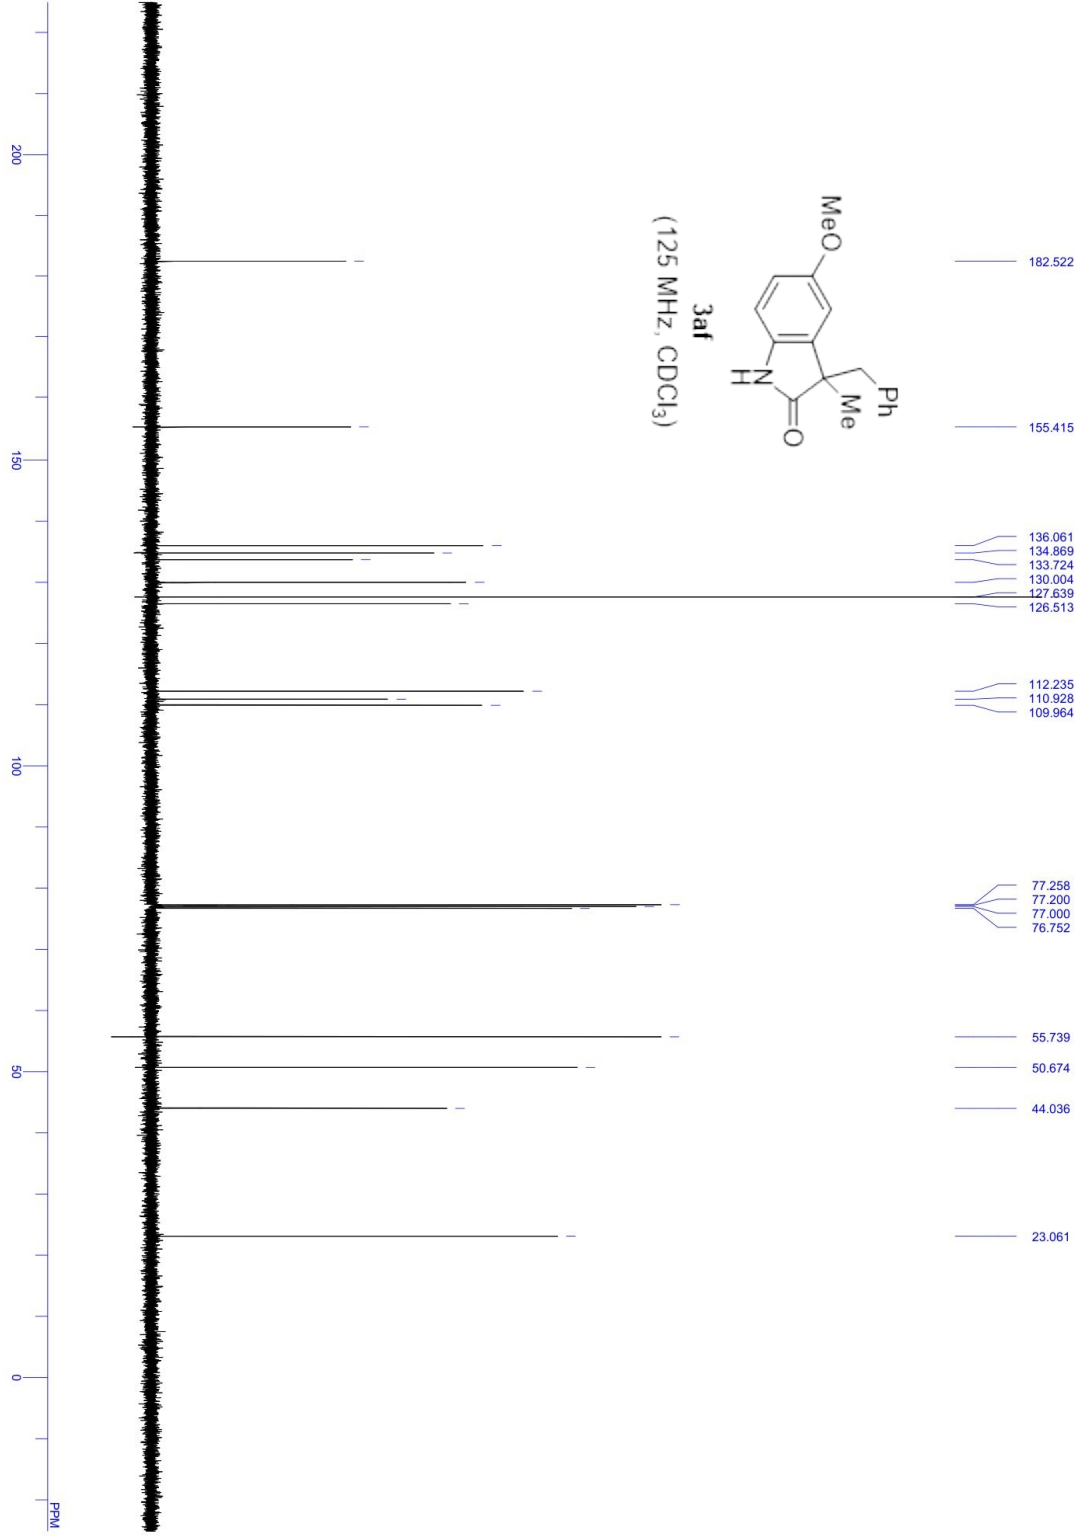

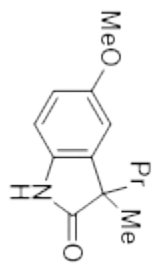

**3a9**  
(500 MHz, CDCl<sub>3</sub>)

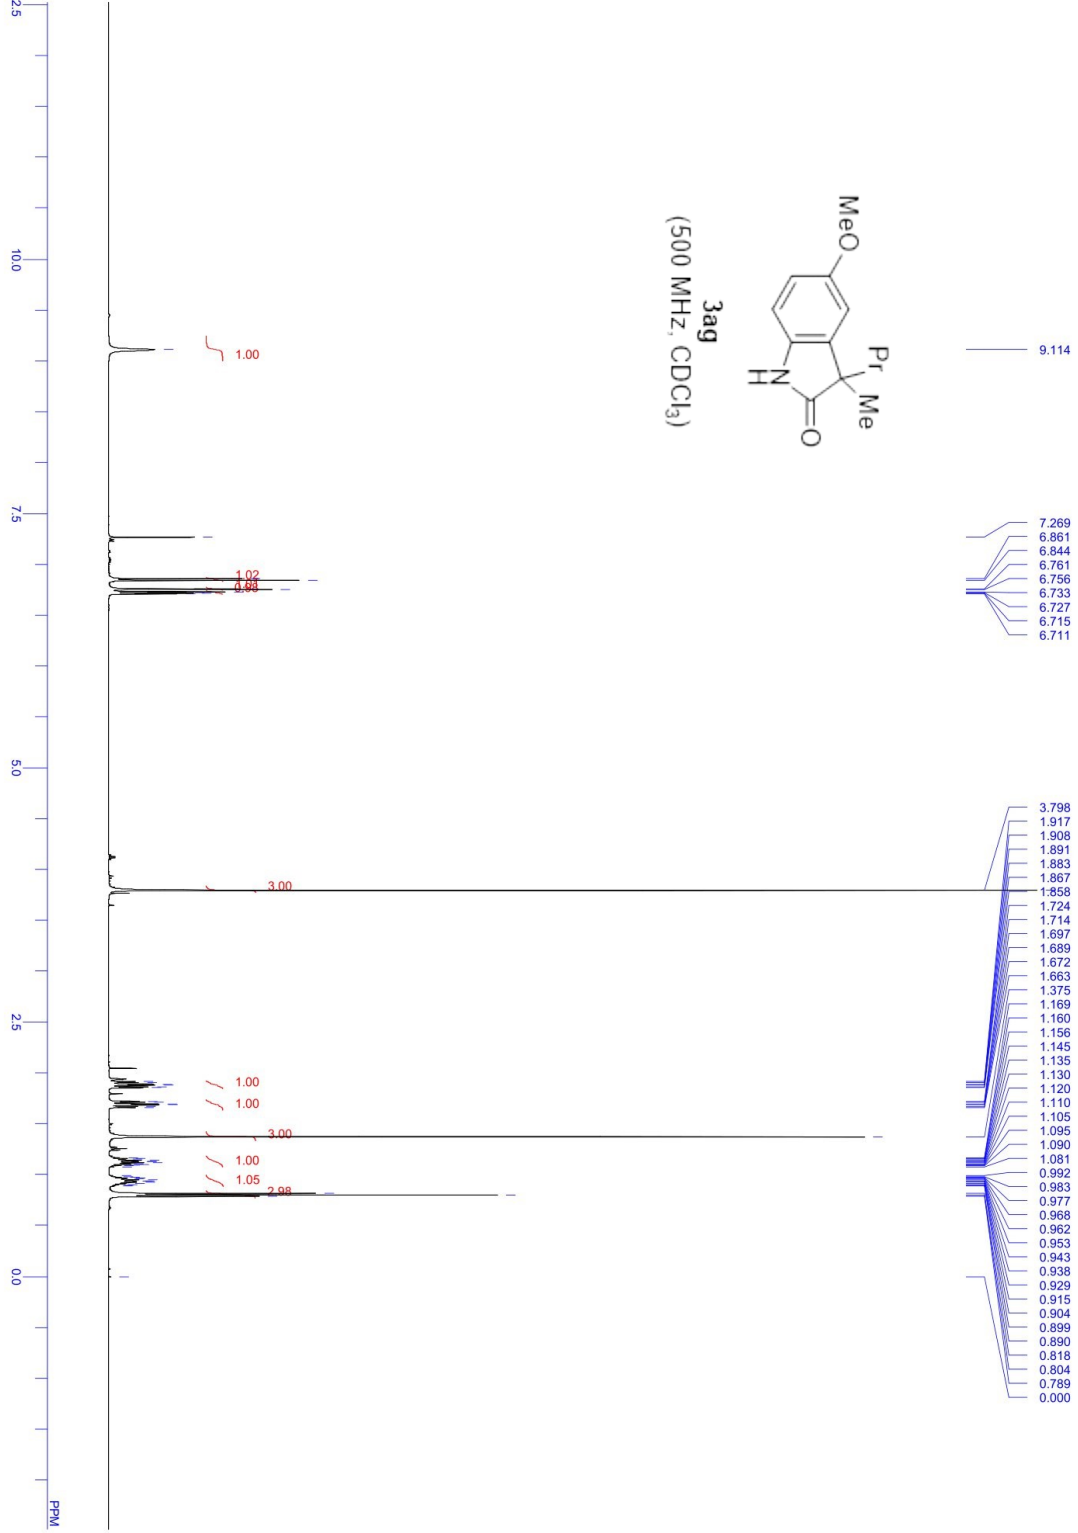

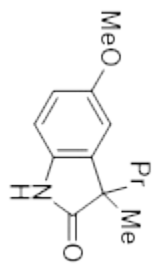

3a<sub>g</sub>  
(125 MHz, CDCl<sub>3</sub>)

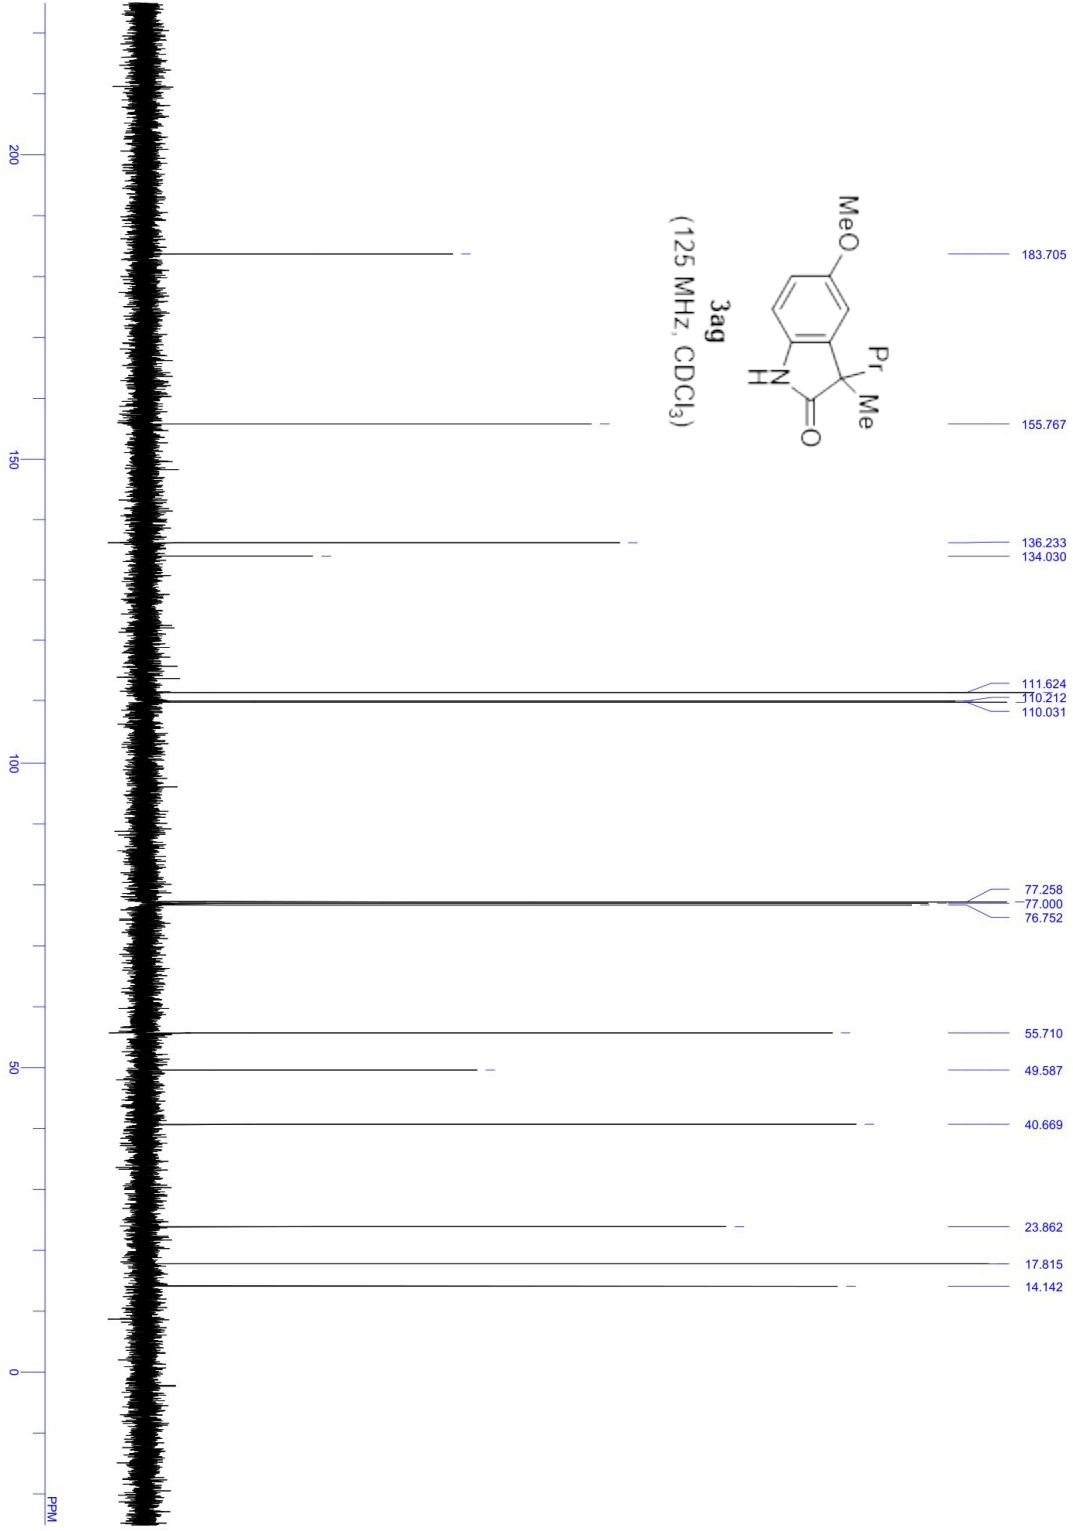



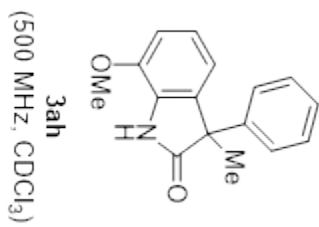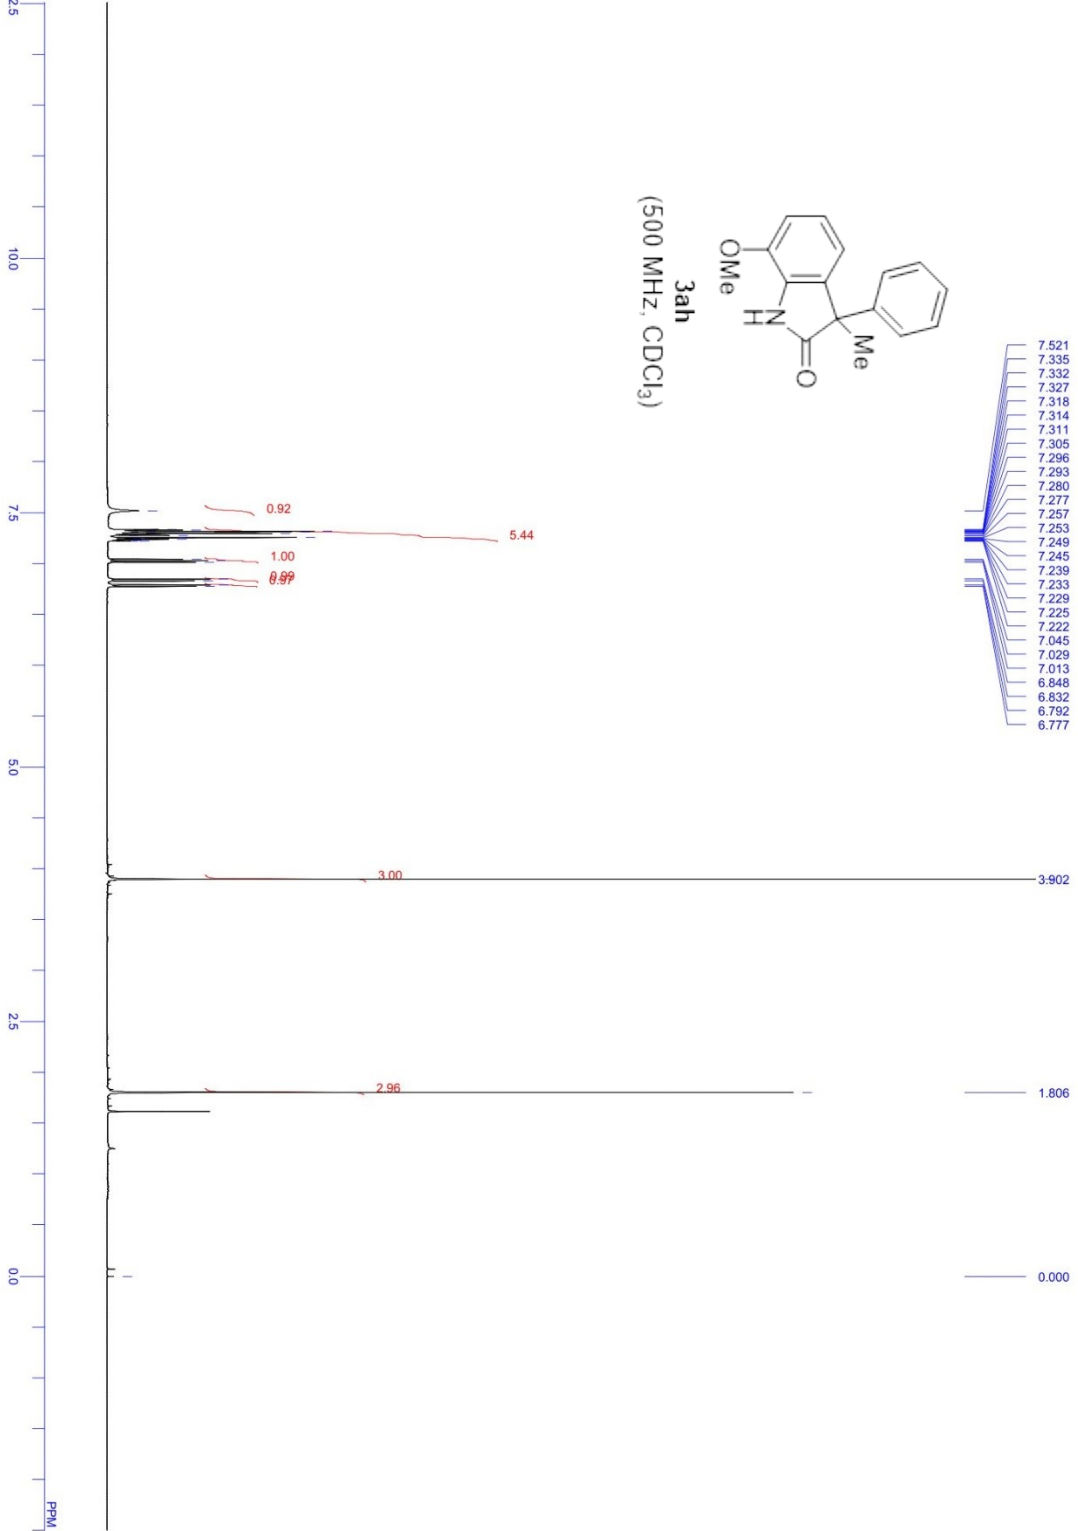

- 7.521
- 7.335
- 7.332
- 7.327
- 7.318
- 7.314
- 7.311
- 7.305
- 7.296
- 7.293
- 7.280
- 7.277
- 7.257
- 7.253
- 7.249
- 7.245
- 7.239
- 7.233
- 7.229
- 7.225
- 7.222
- 7.045
- 7.029
- 7.013
- 6.848
- 6.832
- 6.792
- 6.777

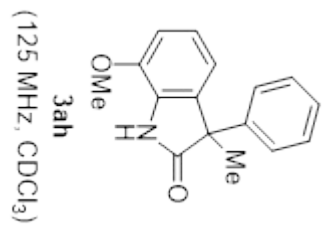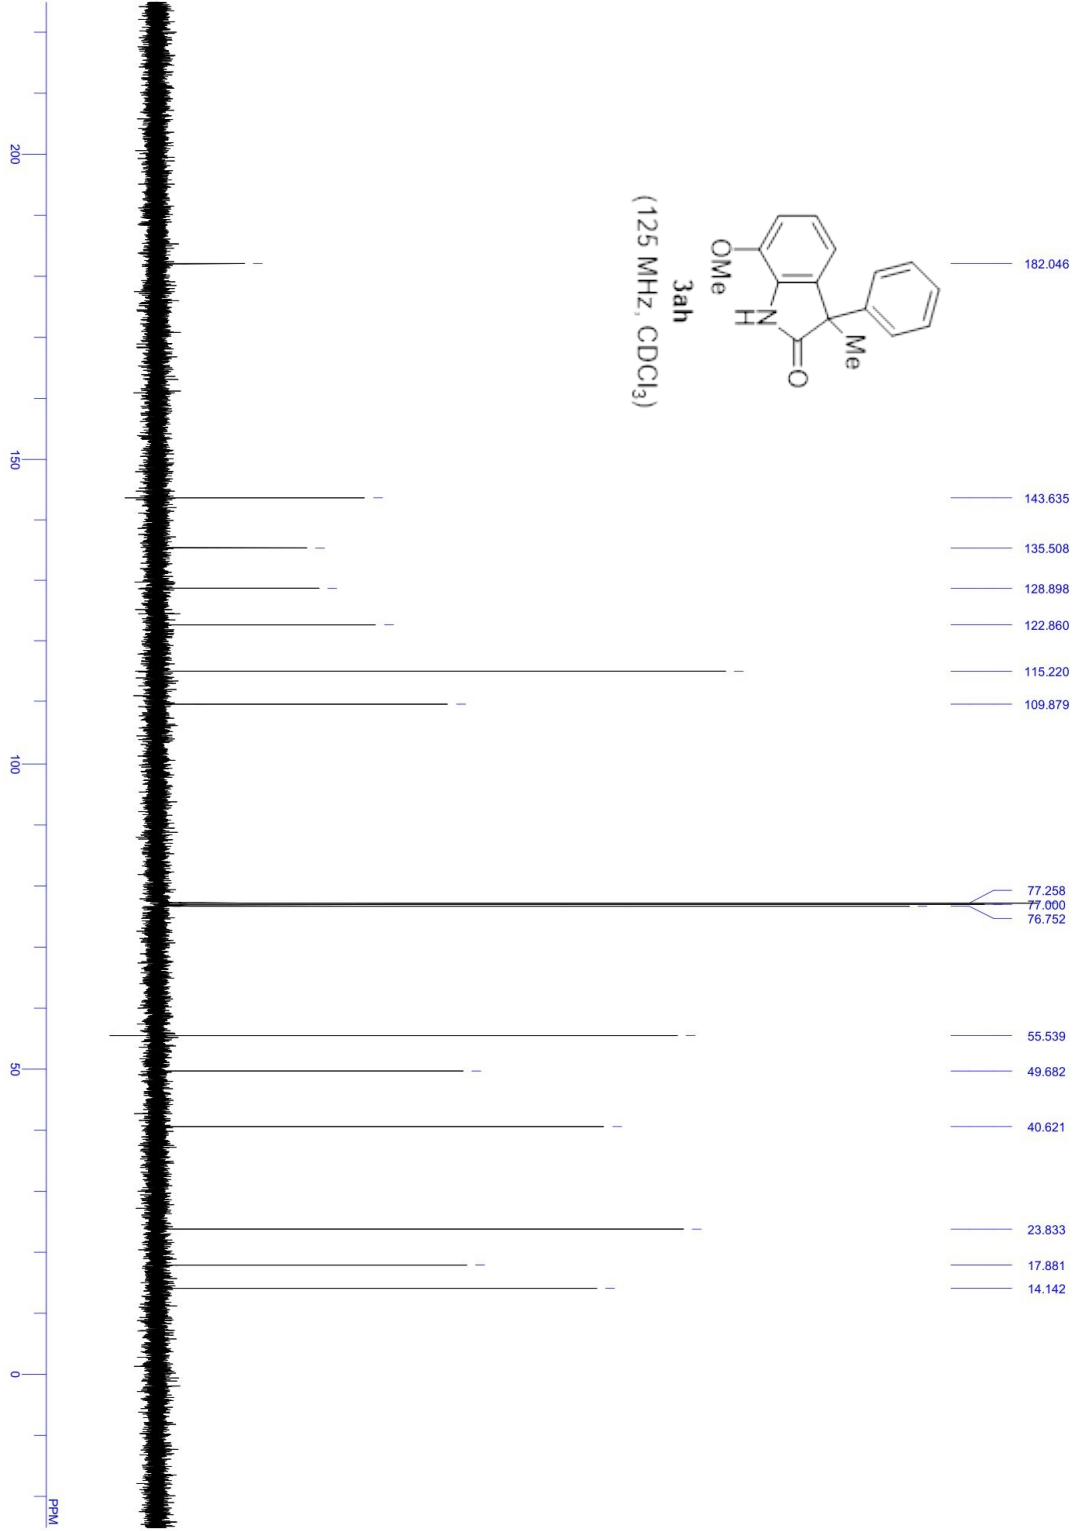

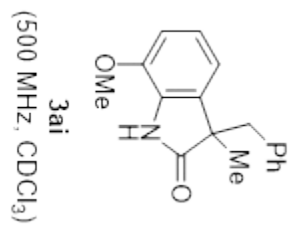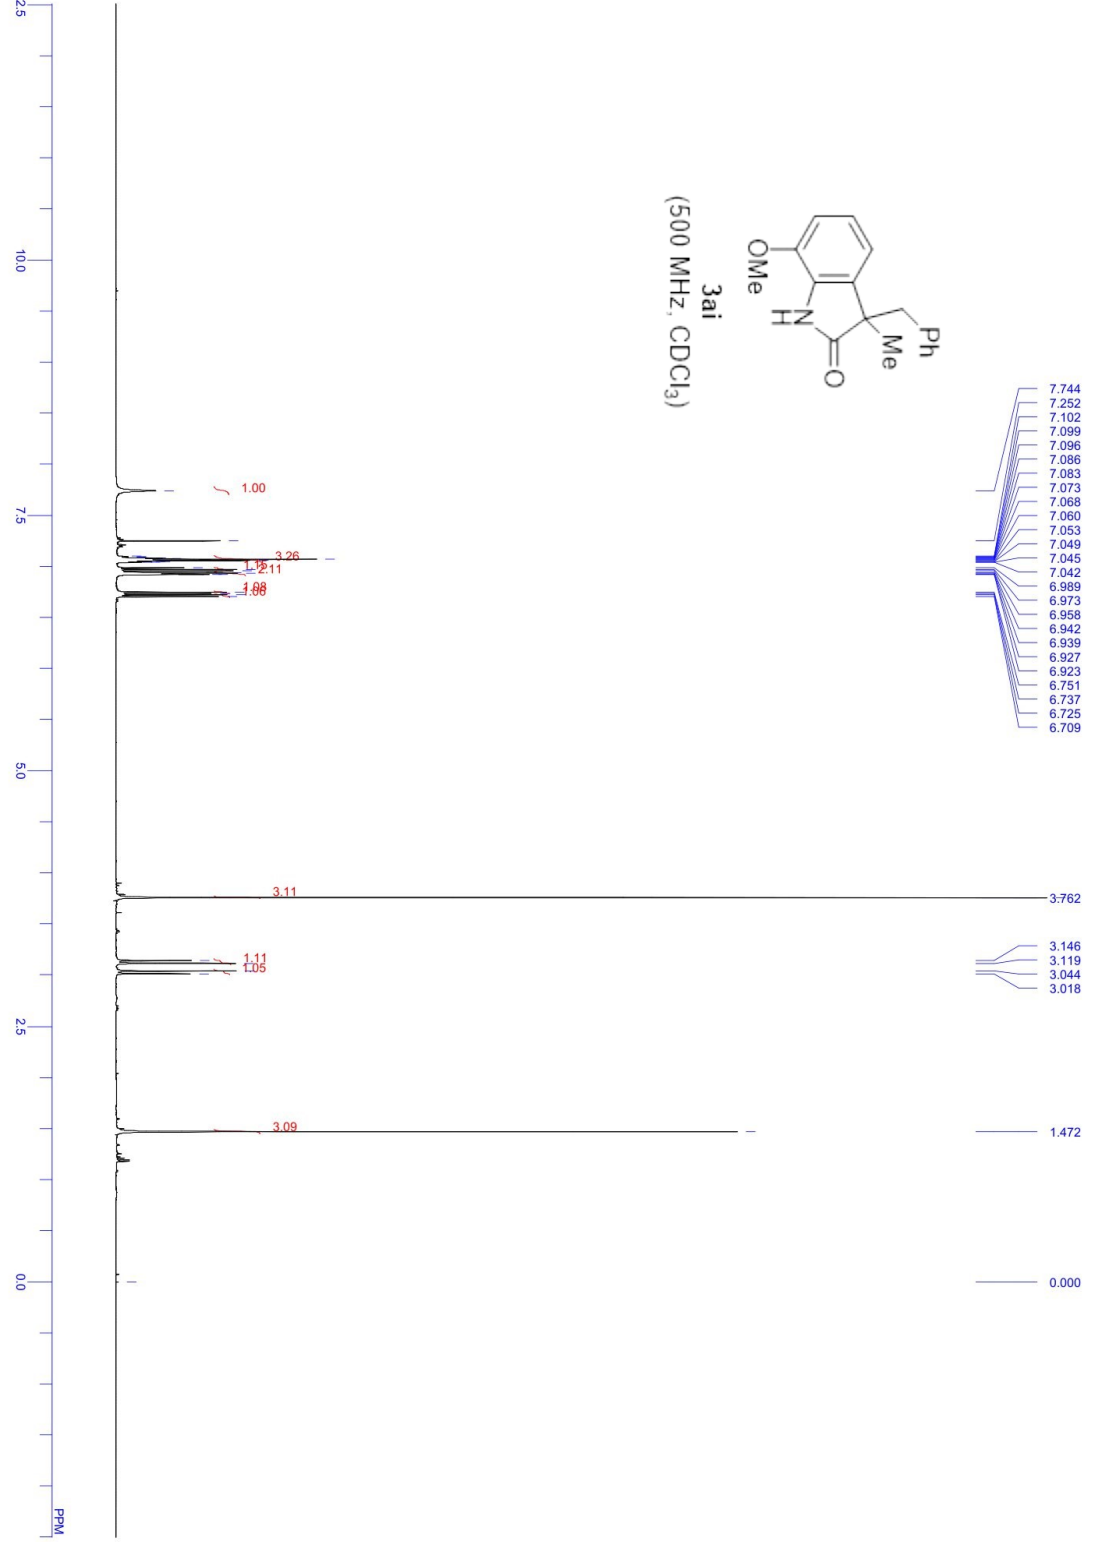

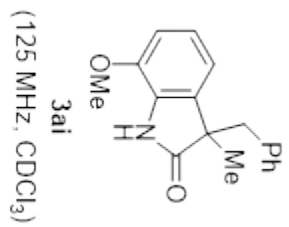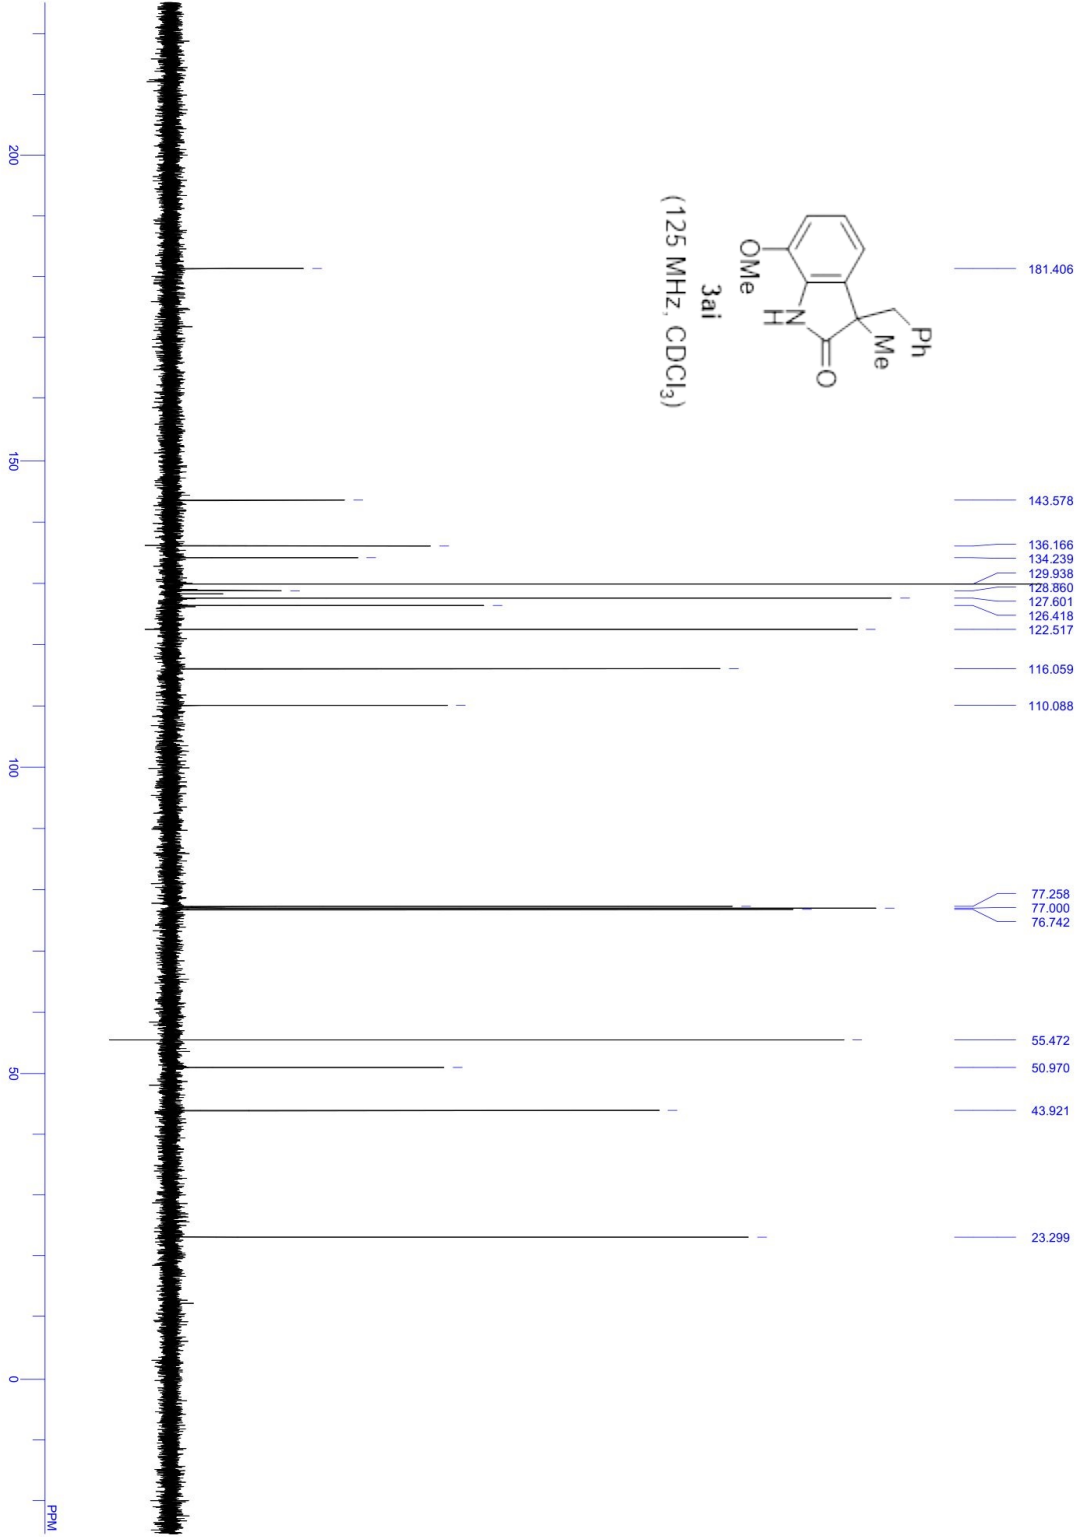

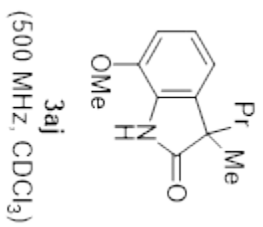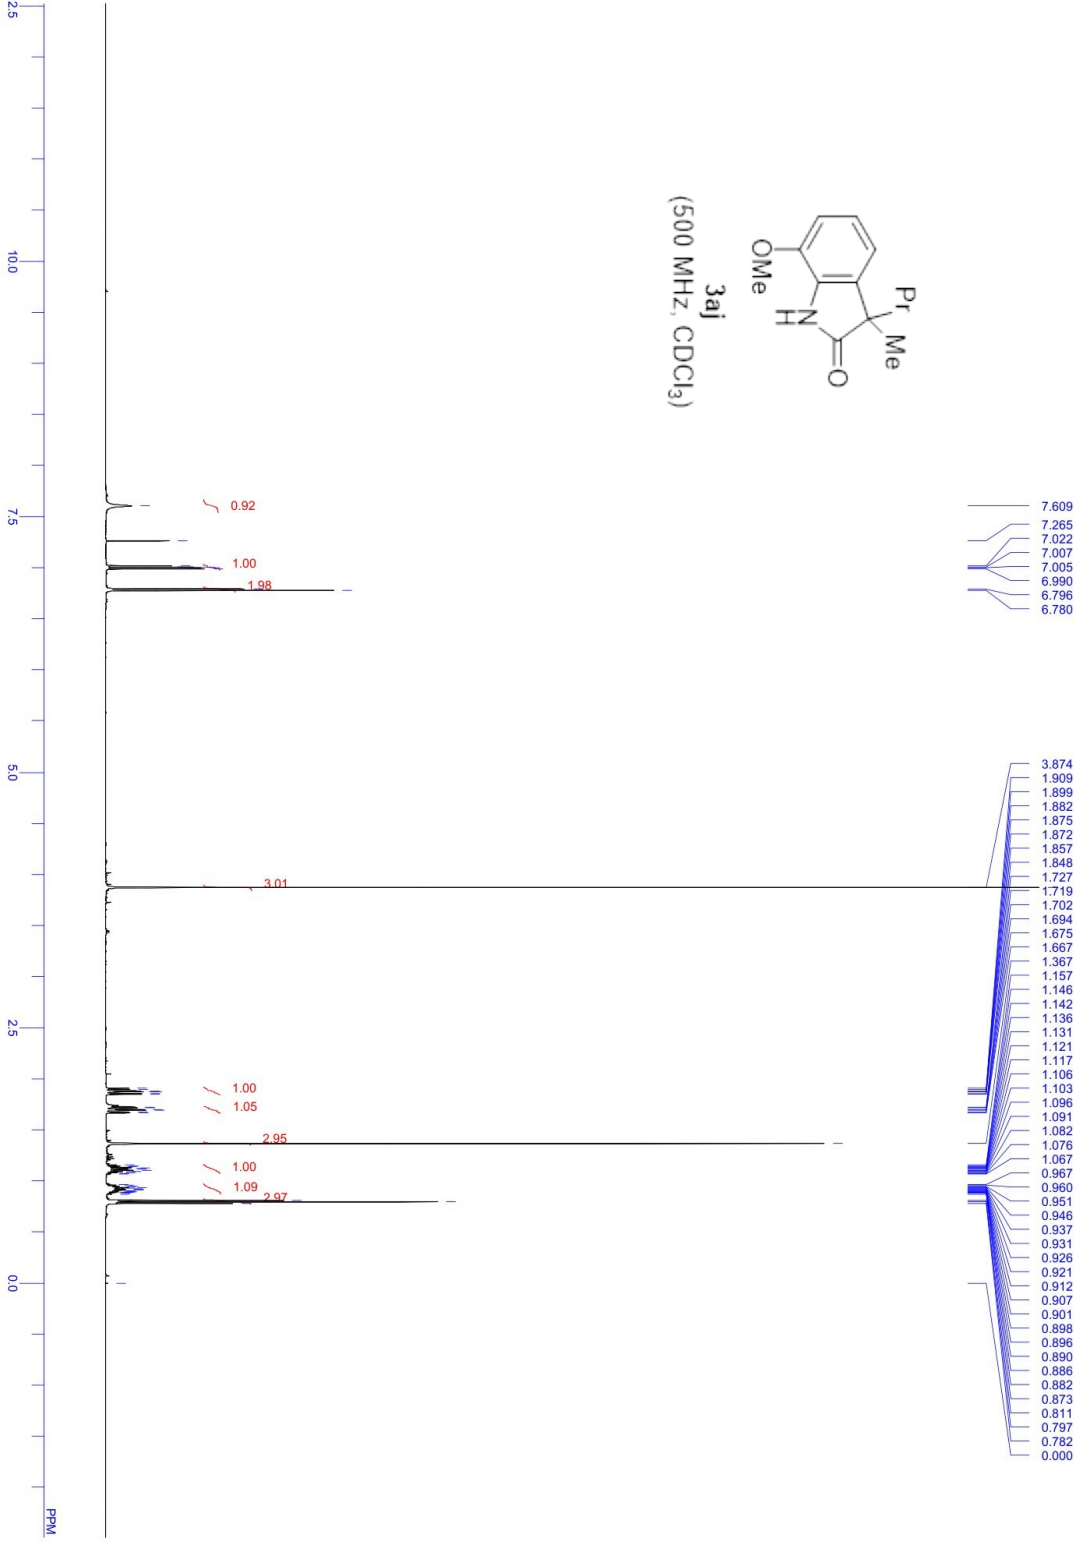

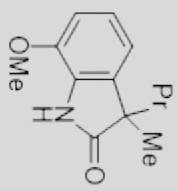

3aj  
(125 MHz, CDCl<sub>3</sub>)

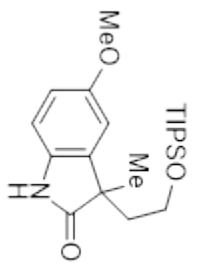

(500 MHz, CDCl<sub>3</sub>)

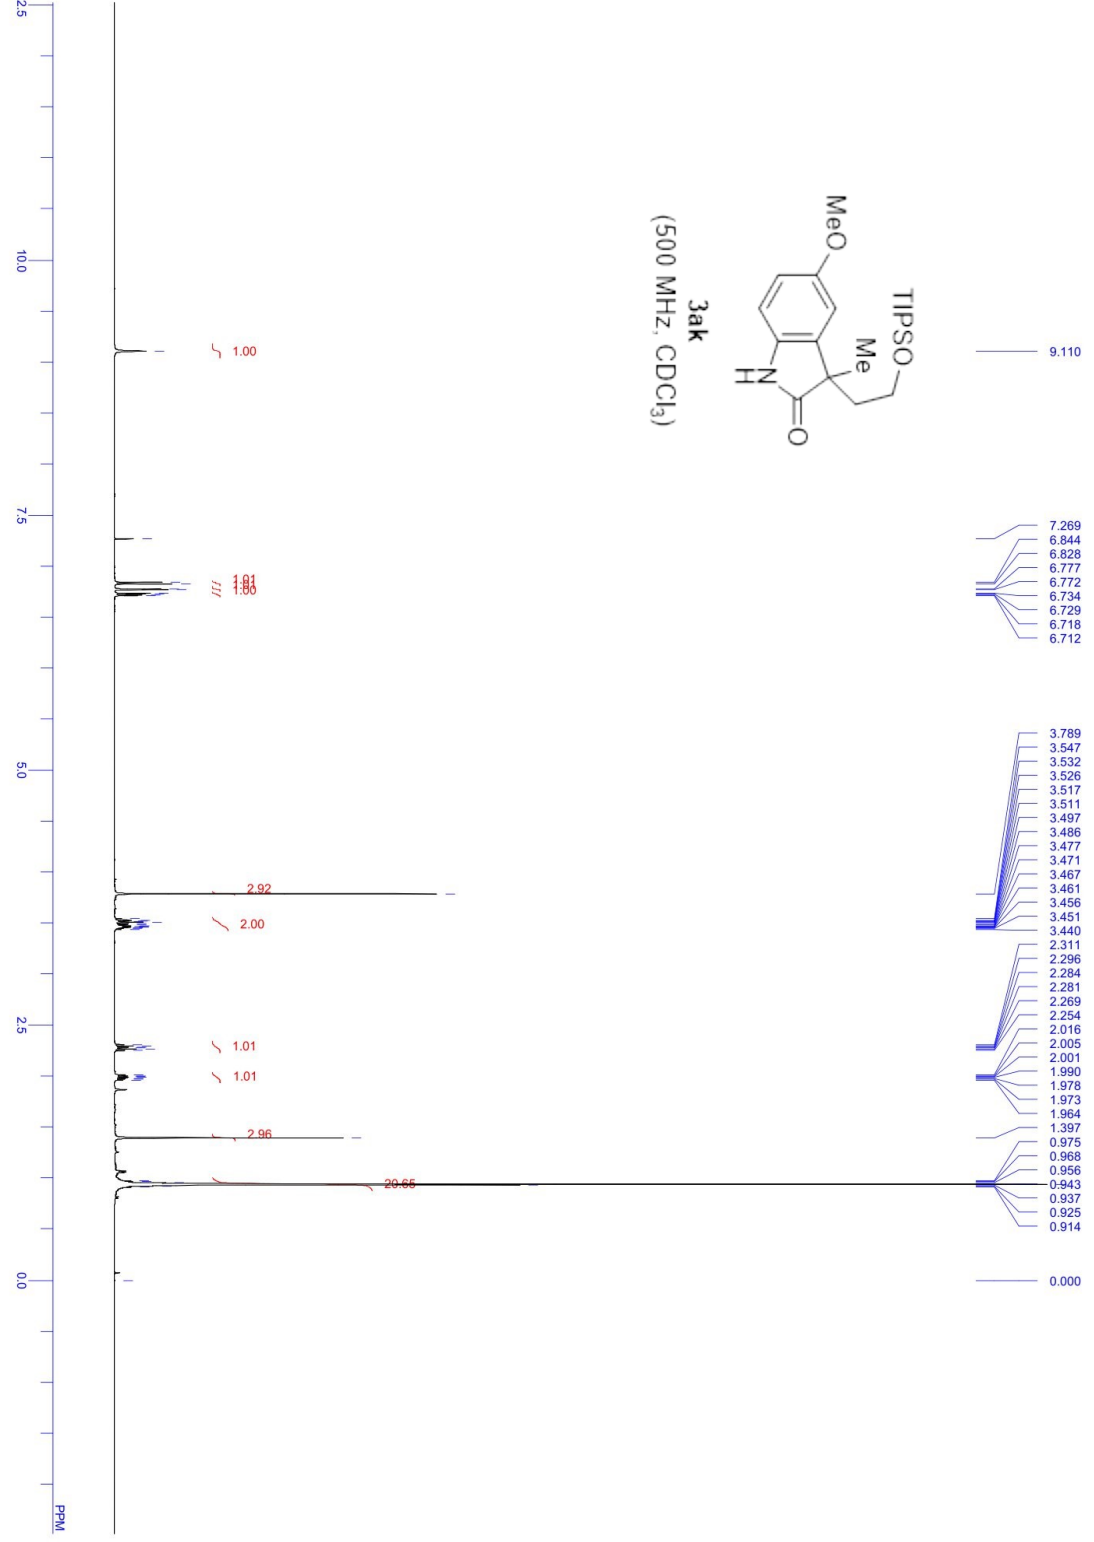

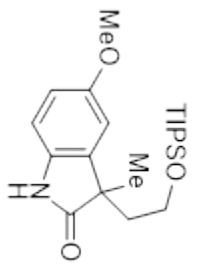

**3ak**  
(125 MHz, CDCl<sub>3</sub>)

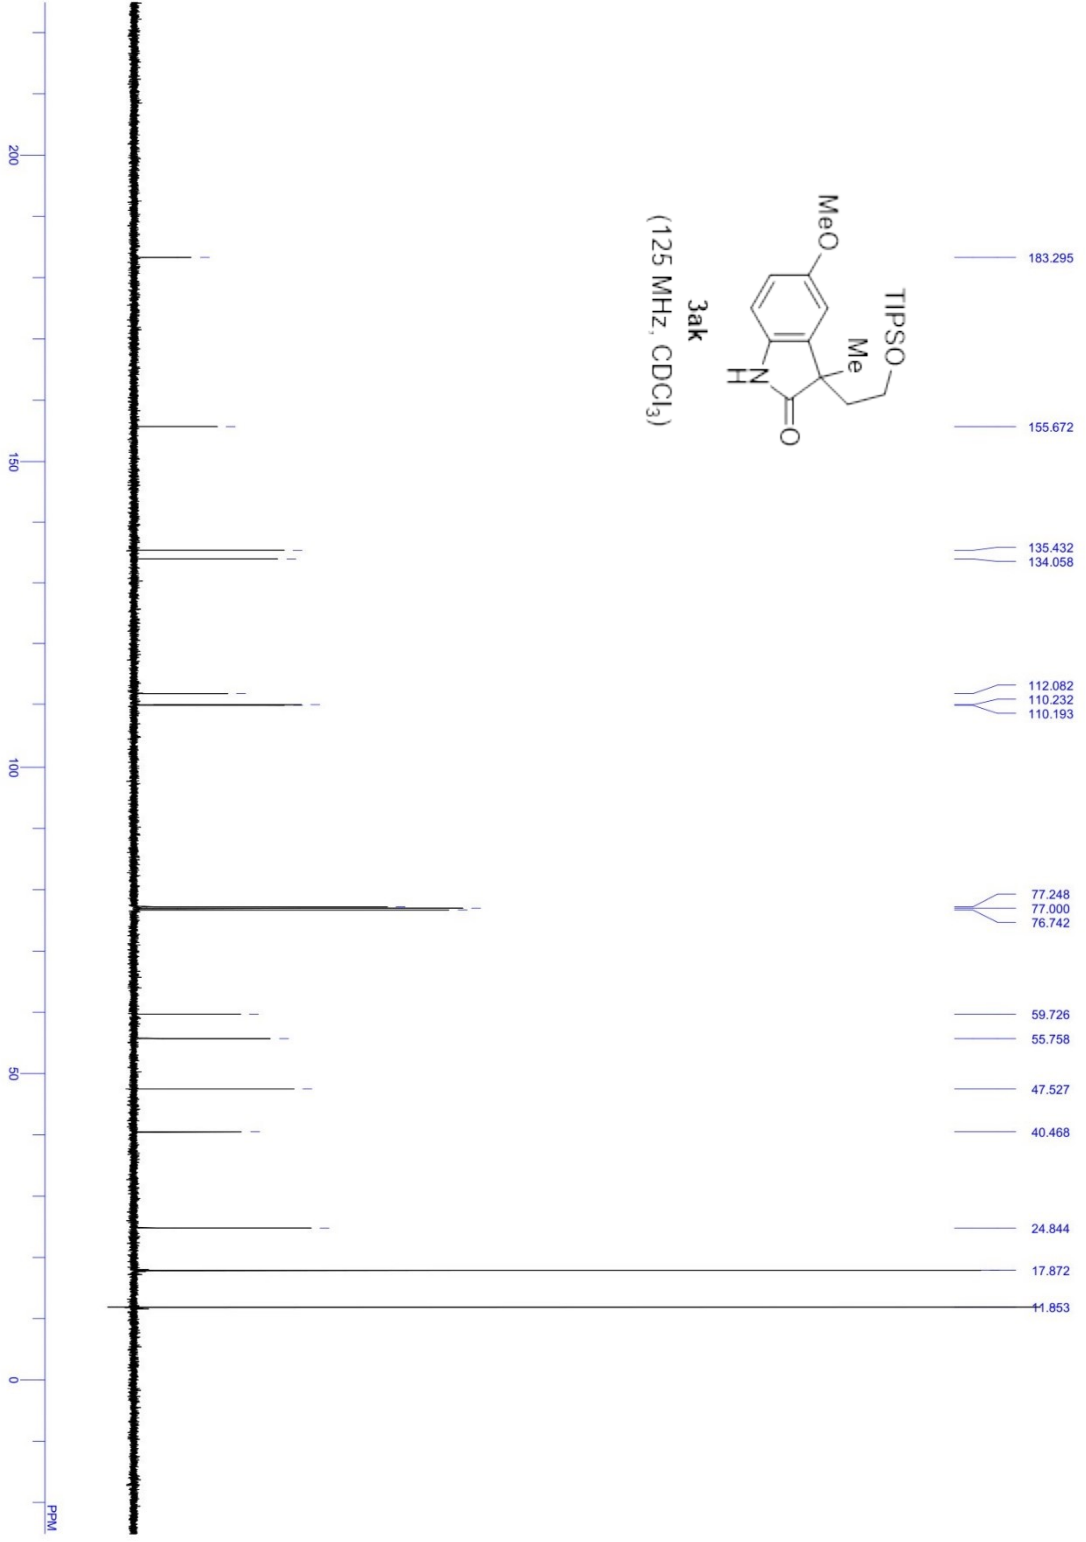



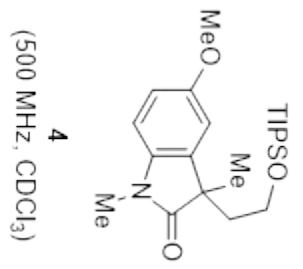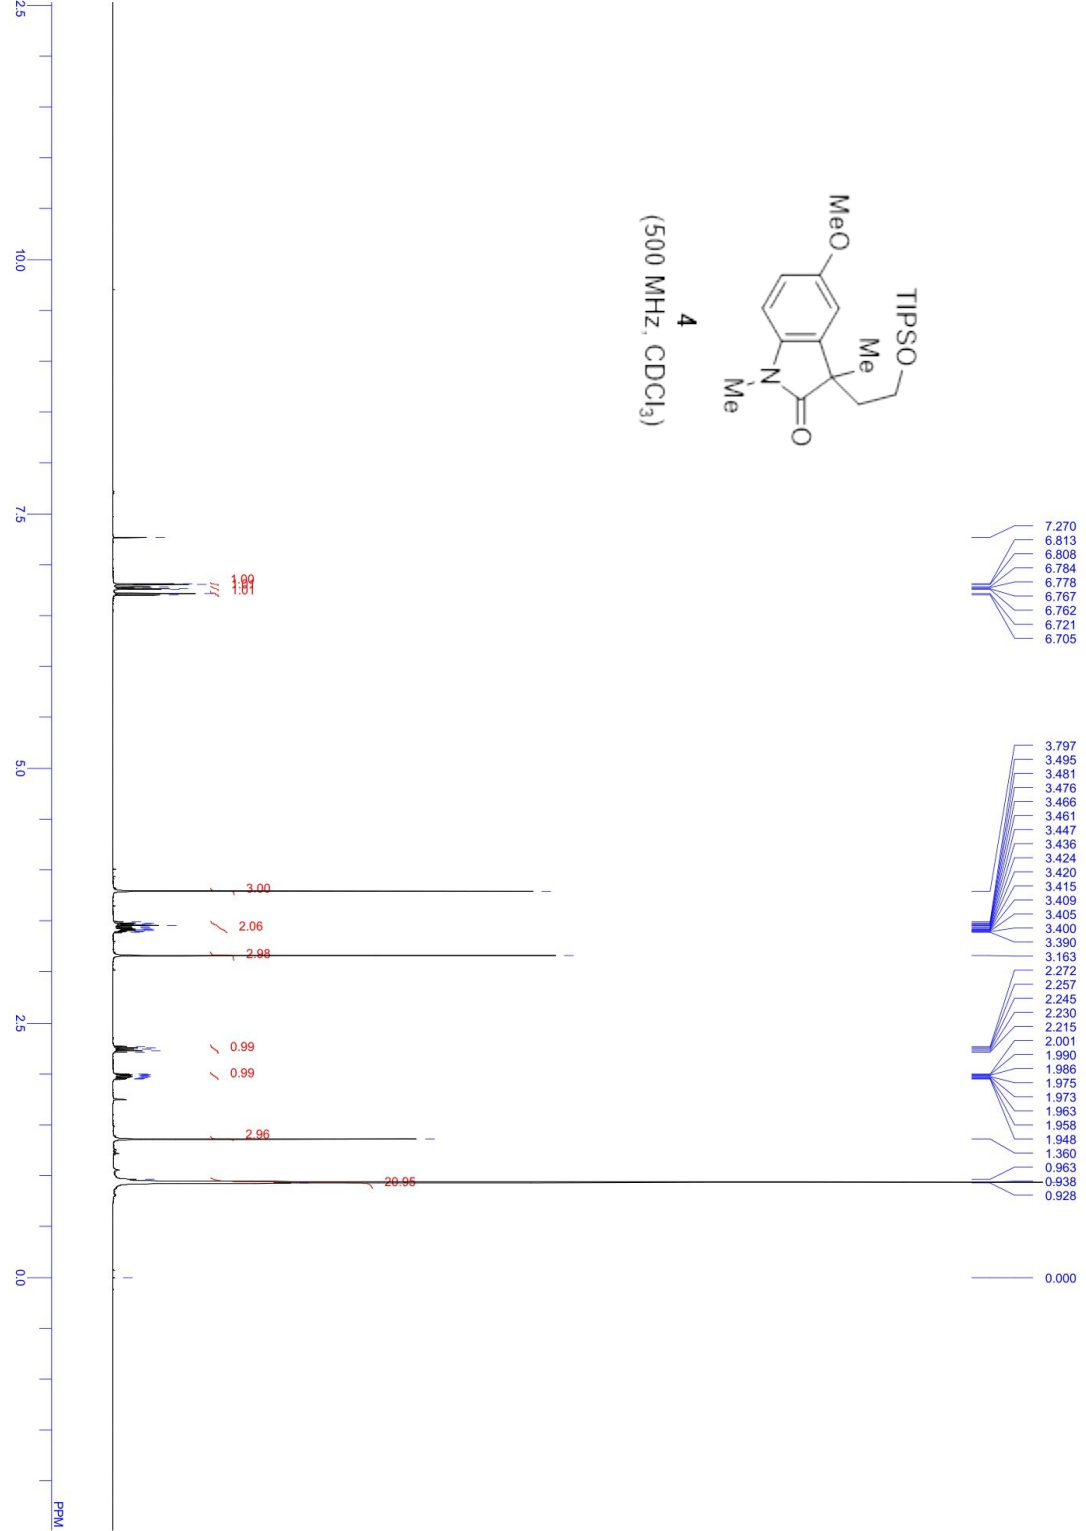

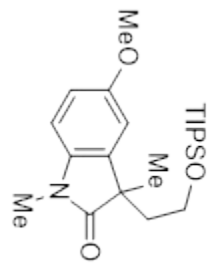

4  
(125 MHz, CDCl<sub>3</sub>)

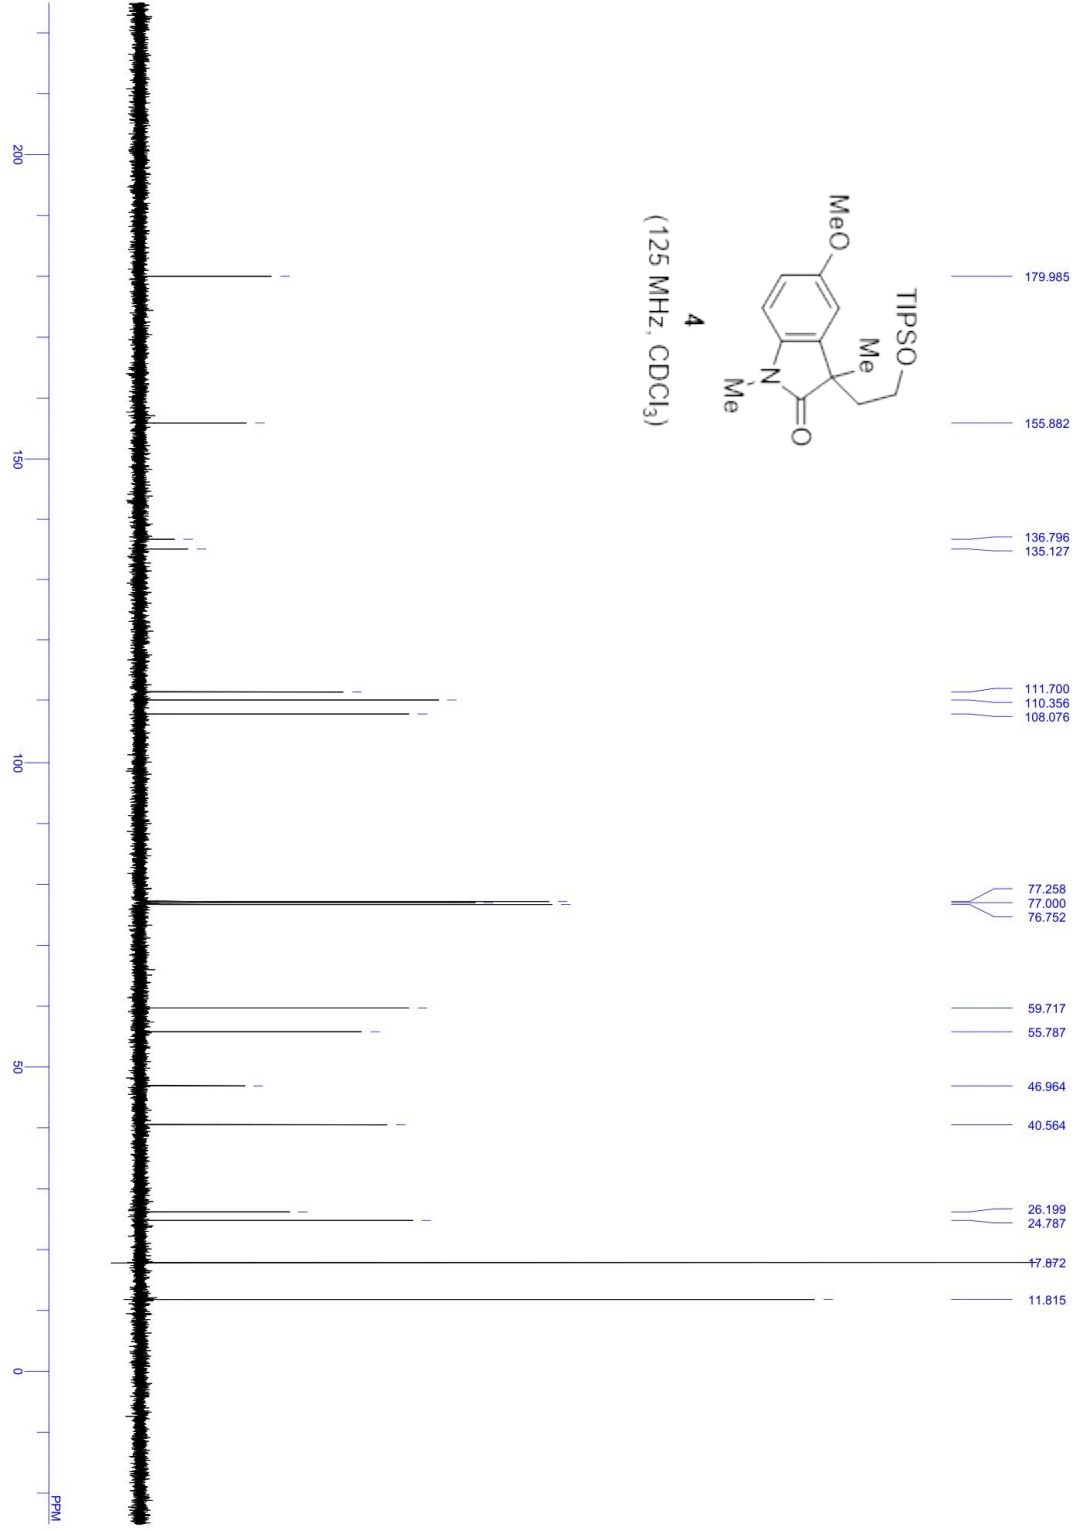

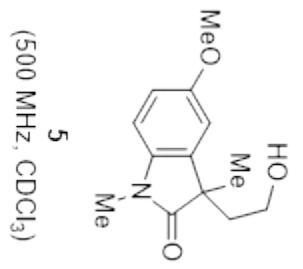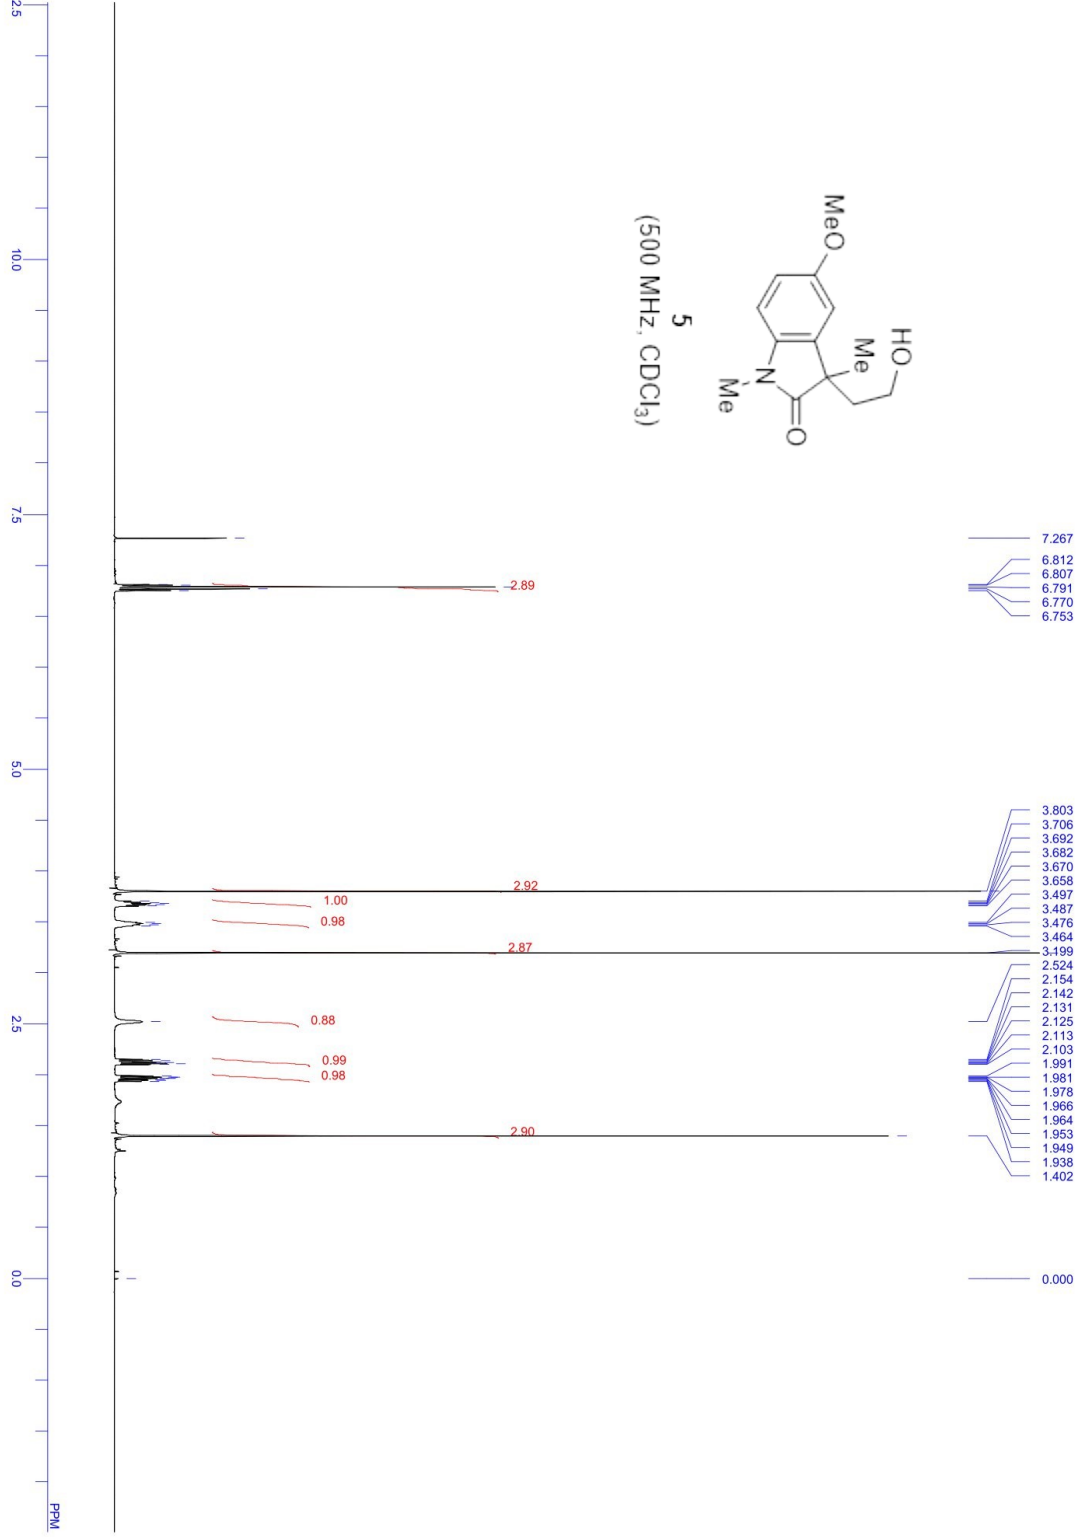

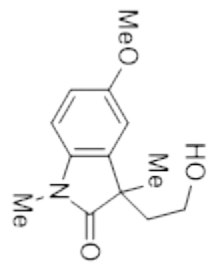

5  
(125 MHz, CDCl<sub>3</sub>)

- 181.159
- 156.225
- 136.328
- 135.594
- 111.853
- 110.184
- 108.553
- 77.258
- 77.000
- 76.752
- 59.325
- 55.787
- 47.384
- 40.087
- 26.418
- 23.490

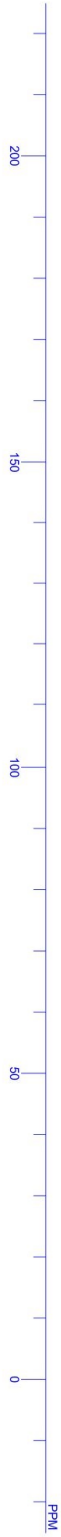

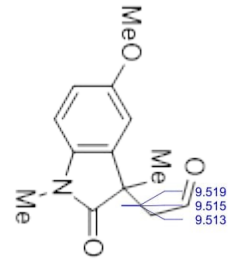

6  
(500 MHz, CDCl<sub>3</sub>)

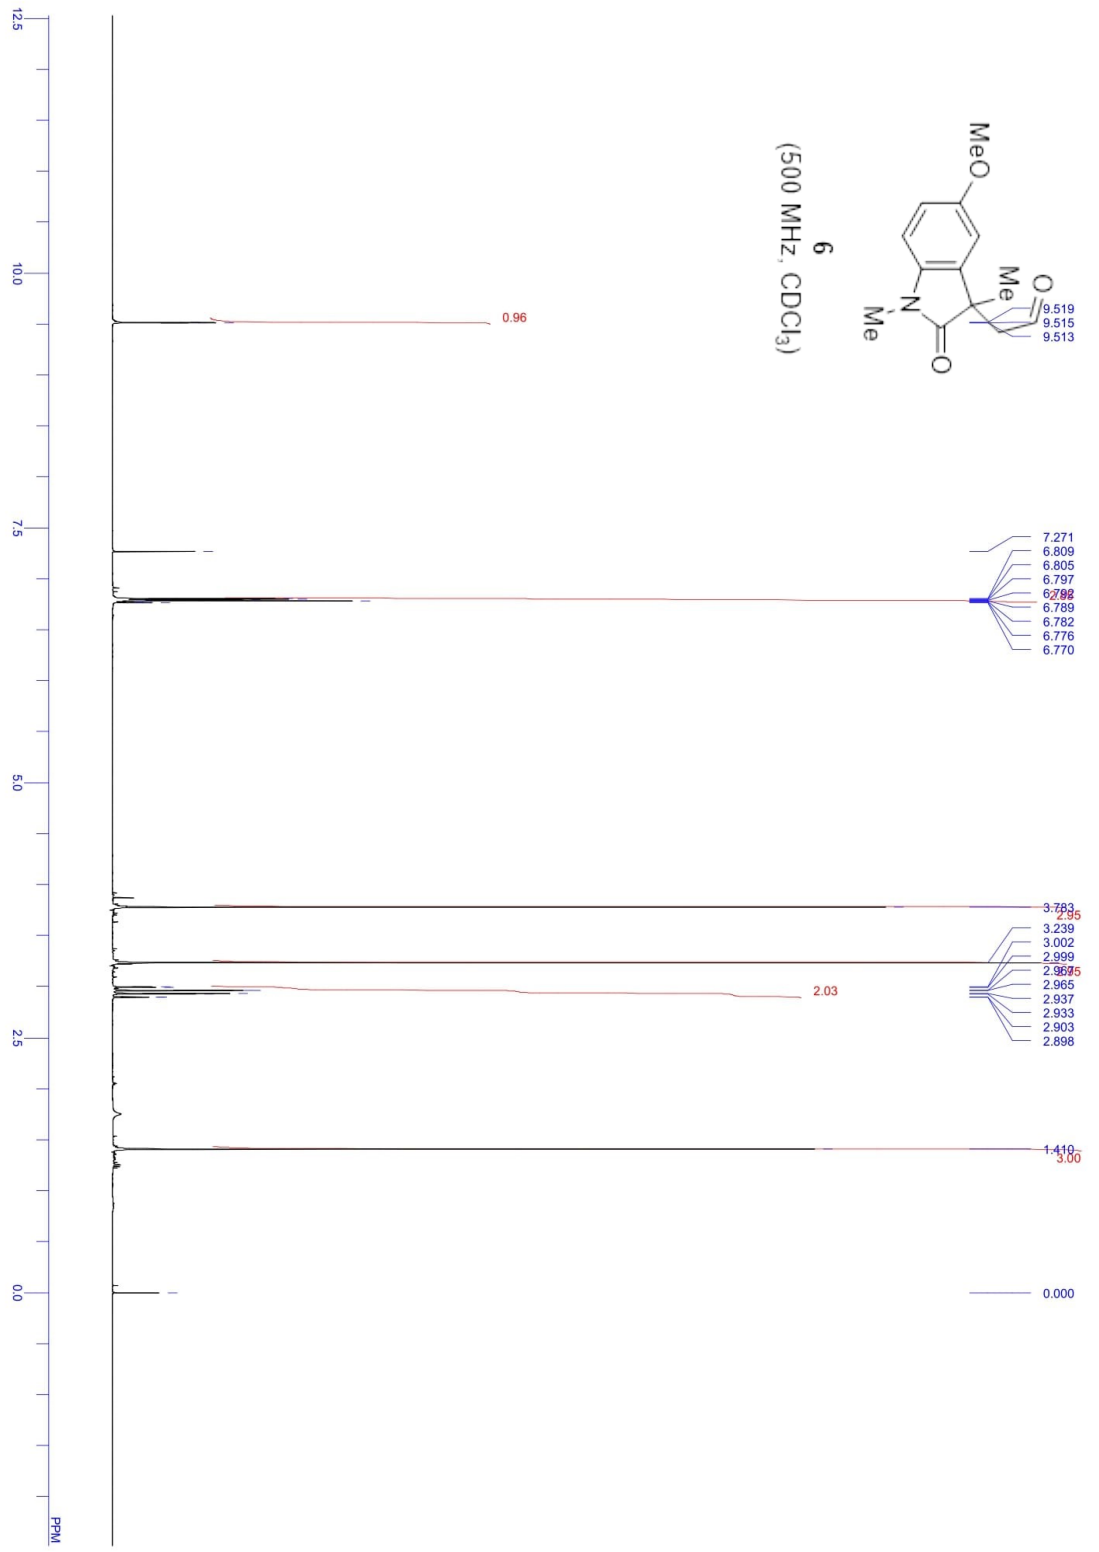

**6**  
(125 MHz, CDCl<sub>3</sub>)

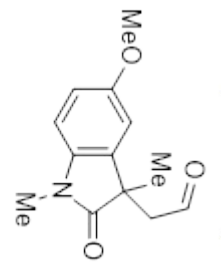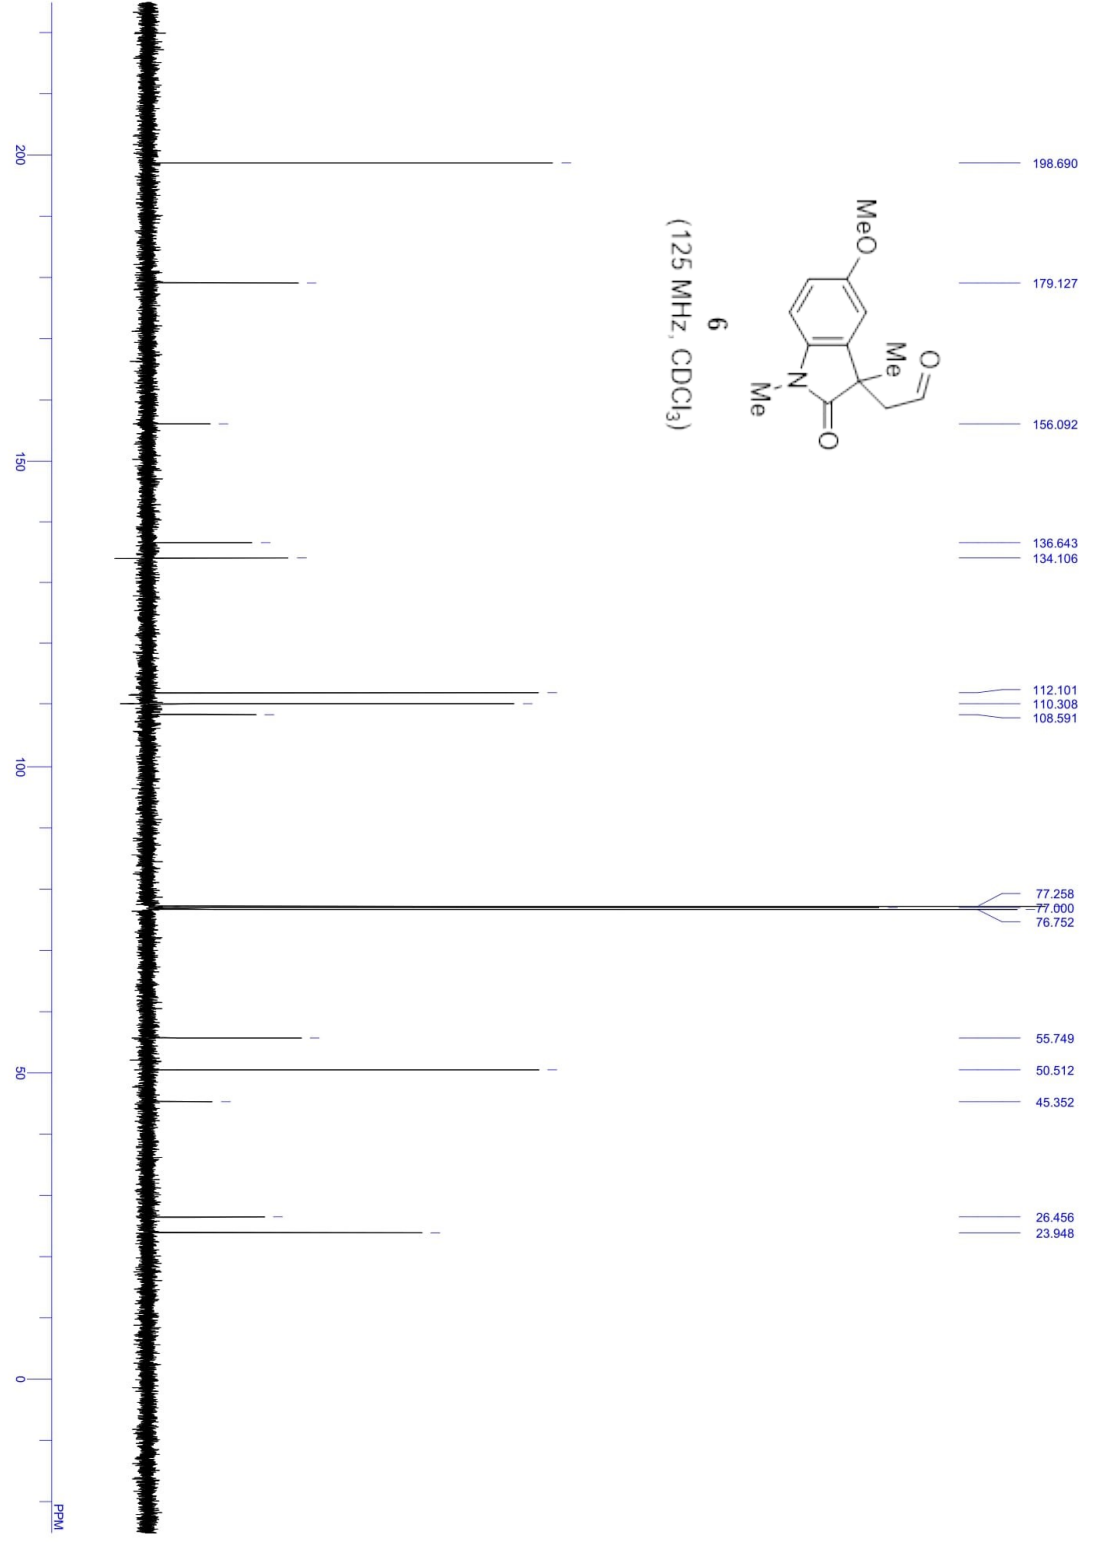

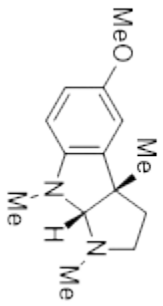

7: Esmermethole  
(500 MHz, CDCl<sub>3</sub>)

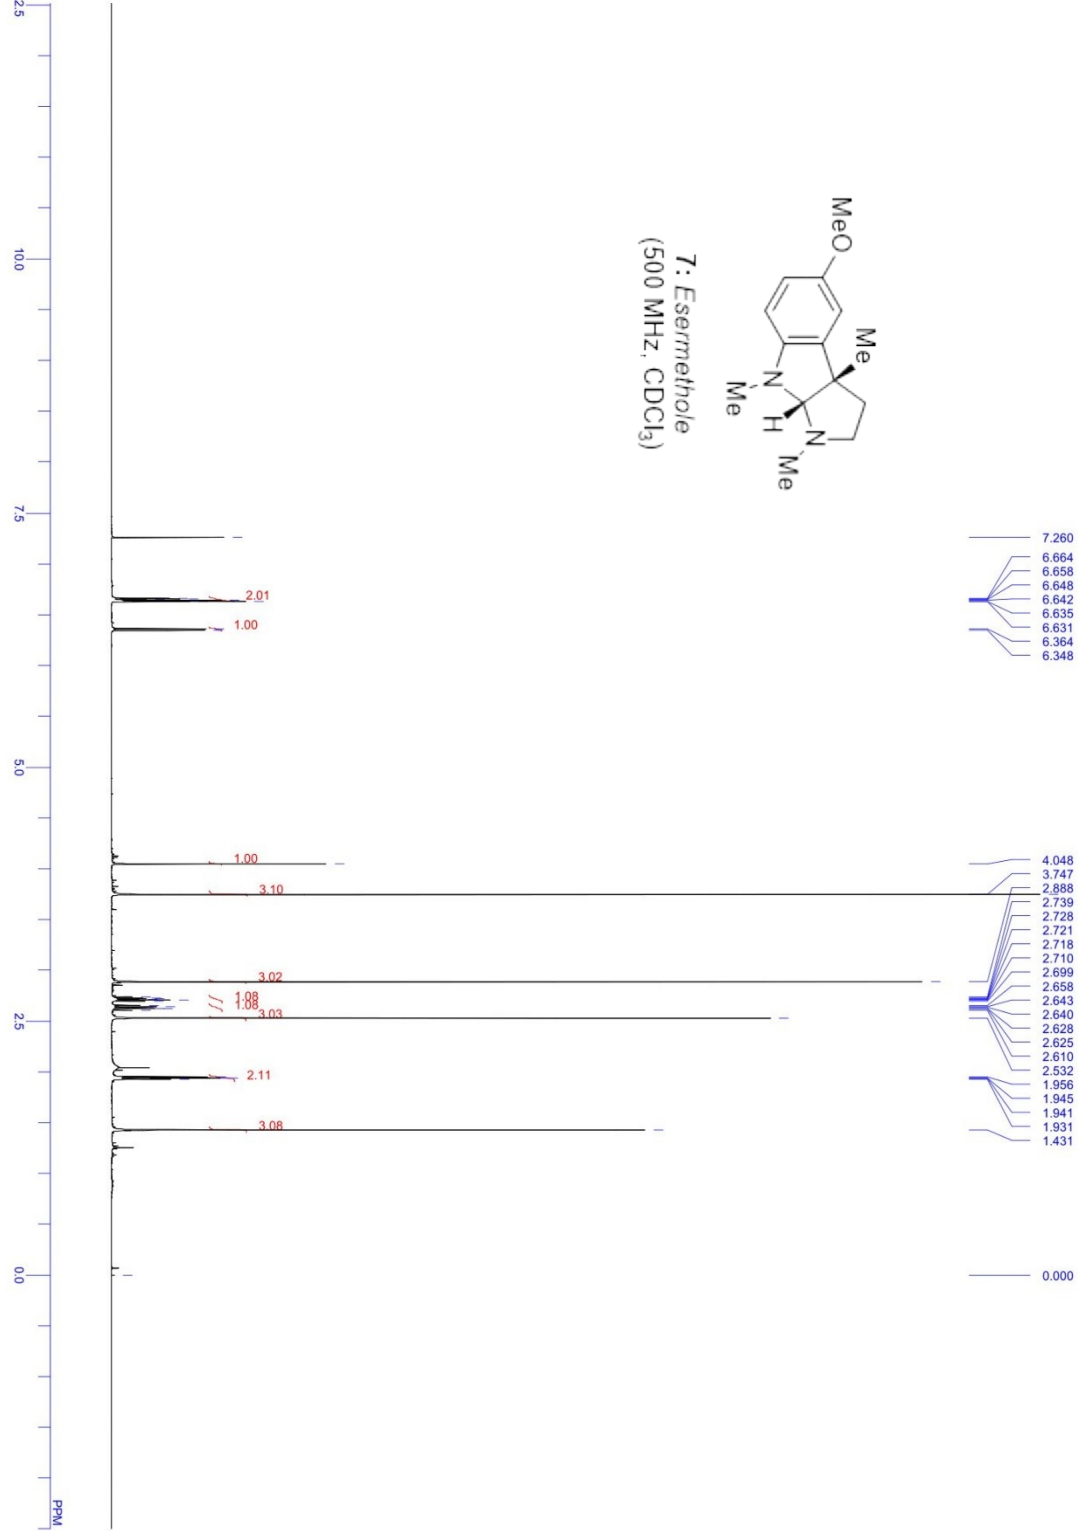

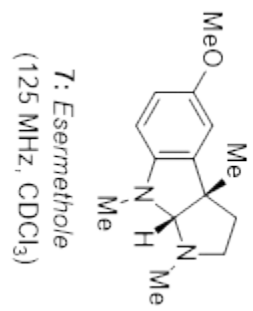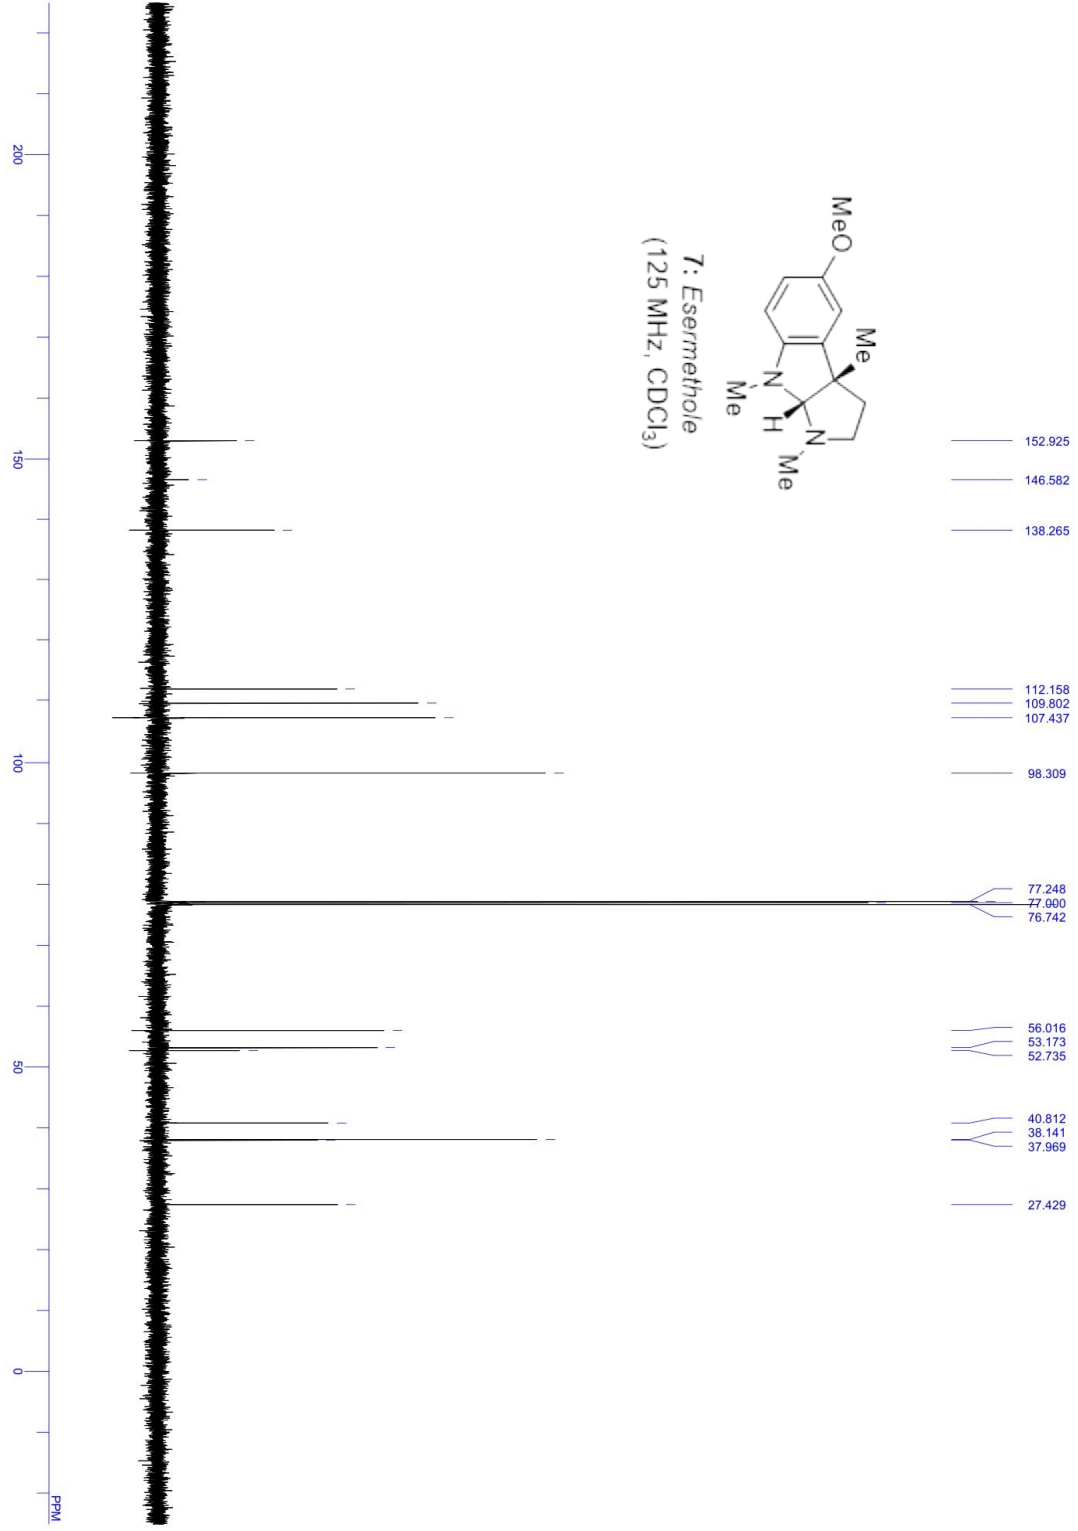

Supplement: d4ob00964a2.pdf [file d4ob00964a2.pdf]
